# Supplementary material
Source: PubMed Central journal article supplement (PMC1502557)
Supplement: pnas_0509809103_1.pdf [file pnas_0509809103_1.pdf]

-----  
¶11510 ¶11520 ¶11530 ¶11540 ¶11550 ¶11560 ¶11570  
GGATTTGCTCCAACATTTTTTATGTTTTTATCATTTGGAAAACCGAGTCCCACAATAAAATCTTA

-----  
¶11580 ¶11590 ¶11600 ¶11610 ¶11620 ¶11630 ¶11640  
ATCTATGAGGTAAGCAGCATCCGATTTGAAGCACCTTTGGCGATAGAATCTATACCGCTTGACT

-----  
¶11650 ¶11660 ¶11670 ¶11680 ¶11690 ¶11700 ¶11710  
TGACTGATCAAGGCATGACAAGGATGGGGCAAGGAGTAGACGAATATTGCGGGCTCCCGCTCGCAG

-----  
¶11720 ¶11730 ¶11740 ¶11750 ¶11760 ¶11770 ¶11780  
**ATTTGCGGTAGTCTCGAACGGGCGAAGGGTCCAGCACCTCAGCAAGTTGTGGAAGGTACACATRAATC**

-----  
¶11790 ¶11800 ¶11810 ¶11820 ¶11830 ¶11840 ¶11850  
**ATTTTGTCTCGAGGCACAAAAATTTGGAATTCCTTTTATAAAAGCAAAAGCGATGTCACTCTCTAC**

-----  
¶11860 ¶11870 ¶11880 ¶11890 ¶11900 ¶11910 ¶11920  
ATGAGCAATCCCTTGAGGACTTCTGAAAGTTTTTCATTTATTCAGTGGTAAAAAACCCAGCTGGATTTGT

-----  
¶11930 ¶11940 ¶11950 ¶11960 ¶11970 ¶11980 ¶11990  
CGAATTTGACCAGTCTCGATGCTTTGGCCGTTGCGAGTCTGCCGATTCCTGCTAGGCGTCCCACCCGC

-----  
¶12000 ¶12010 ¶12020 ¶12030 ¶12040 ¶12050 ¶12060  
CCAGGATTCCTCAACCCAGGGCAATGGGAGAGGATCCGTCGTAACAGAAATAGGTAACCTGATAAACT

-----  
¶12070 ¶12080 ¶12090 ¶12100 ¶12110 ¶12120 ¶12130  
CCTCGTTTCCCAGGAAATCTTTTATTAATAAAGTTTCTTCTACAGTATATACAGACGTTCTTACGAC

-----  
¶12140 ¶12150 ¶12160 ¶12170 ¶12180 ¶12190 ¶12200  
TCGGTTTTGGGATCTAGGAAGCCAGGATAAATGGCAGAAATGCTGCGGACTCTGAGCTTTGTCAATCATA

-----  
¶12210 ¶12220 ¶12230 ¶12240 ¶12250 ¶12260 ¶12270  
TTCATTTTGATAACATAAAGATACCCTAAATTCGTTTTATTTTTCTCGTTTTTCATGTTTACCTAGTA

-----  
¶12280 ¶12290 ¶12300 ¶12310 ¶12320 ¶12330 ¶12340  
TTAATTTAATATATATTTACATTTGAAACGTTGTTGTCAATCAAAATAATACCCCTCTCTGTGGGAGCCA

-----  
¶12350 ¶12360 ¶12370 ¶12380 ¶12390 ¶12400 ¶12410  
ATAATAATGCAAGTCCAATTTTTTATACCGTTACTCGTAAGGGTAAGATTTCGTTGAAACTGGCAGAAG

-----  
¶12420 ¶12430 ¶12440 ¶12450 ¶12460 ¶12470 ¶12480  
GAAGCGTTTCCGACCATATAATCTATATATATATAATATTTCTTGATCAGGAGAAATAGCCGAGTCAATC

-----  
¶12490 ¶12500 ¶12510 ¶12520 ¶12530 ¶12540 ¶12550  
TGGTCATGTCGGTCTGTCGGTATGAACGTCGAGAACTATAAAAGCTAGAAGTTGAGAGTCCAAGTTGA

-----  
¶12560 ¶12570 ¶12580 ¶12590 ¶12600 ¶12610 ¶12620  
GATCCATGTTGCCACGCCACTCTAACGCCATAATACAGCCCCCAAGATTATCGCCGTGAGGTAAACGA

-----  
¶12630 ¶12640 ¶12650 ¶12660 ¶12670 ¶12680 ¶12690  
TGTAATCGAAGGATTACAGCGCCCGACATGGGCGCAACTTTGTGGTCCCGCGATGGCAGGCGACA

-----  
¶12700 ¶12710 ¶12720 ¶12730 ¶12740 ¶12750 ¶12760  
GGATCACAGATTCGCGCGGACAGCTGCGGGGATACCTTGGTCGGAATGCGTGGATTCTGTACGATTTCC

-----  
¶12770 ¶12780 ¶12790 ¶12800 ¶12810 ¶12820 ¶12830  
AGGACATTTGGTAGCATCCACAATGGGTTTTGTCCATAAAAAGTAACTGCGCAGGATGCGGTTTGT

-----  
¶12840 ¶12850 ¶12860 ¶12870 ¶12880 ¶12890 ¶12900  
GTAACGATCACCGATCAGAGGACATTTATGCAGCATCATTCGTGCGGATATCCTGTACATCCGCTG

-----  
¶12910 ¶12920 ¶12930 ¶12940 ¶12950 ¶12960 ¶12970  
CATGGCGTATAAATGATCCAGCCGATCAGATTCCCACAACGATTCAATGCGCATAAATGAAATCATC

-----  
¶12980 ¶12990 ¶13000 ¶13010 ¶13020 ¶13030 ¶13040  
ACAAAATATTATAAAGTATTTAAGAAAGAAATCTTTAGAAATCTCAATCTGATGAACTGCTGTGTGT

-----  
¶13050 ¶13060 ¶13070 ¶13080 ¶13090 ¶13100 ¶13110  
ATGTAGAGCTATAATATAAATTTAAATTTATATTTTAAATGCTAAGAAACTTTGCTATCTGTGAGTTT

-----  
¶13120 ¶13130 ¶13140 ¶13150 ¶13160 ¶13170 ¶13180  
CTAAATTTCTGATCAAGTGGGCATTGAAAAAACATTTTGTGTTTTGTGACTTCGTATCAGTAAAAAG

¶13190 ¶13200 ¶13210 ¶13220 ¶13230 ¶13240 ¶13250  
ACCGATTACATTGGCCAGCACCATGAAACAGCTCCGAAAACTTACCAAATAGACCGTTGAAAAAT

¶13260 ¶13270 ¶13280 ¶13290 ¶13300 ¶13310 ¶13320  
ATTTTACAAAAGTAAAGGGCAGGAAAATAGCCTTTTTCACGTTTATACATATTTGGTAAAAATTTCCA

¶13330 ¶13340 ¶13350 ¶13360 ¶13370 ¶13380 ¶13390  
AACCCAAAGTATTTGTATCCAGGAACAGAAAGTAAAGTTTCAAATTTAAACCACTTTTGTAGACACCAATCGC

¶13400 ¶13410 ¶13420 ¶13430 ¶13440 ¶13450 ¶13460  
GTGCTCACACAACCTCAATCACAATCAAATTTTCGGTTCCAAATAAAAAAAAAAAAAAAAAAAAAA

¶13470 ¶13480 ¶13490 ¶13500 ¶13510 ¶13520 ¶13530  
AAAATTTCCAACCTTCCCTGGGGAAAAGTAAAGCTTTGGGTAGATTATCGGACAACATTTTTTTCGTTTAG

¶13540 ¶13550 ¶13560 ¶13570 ¶13580 ¶13590 ¶13600  
CCCCATCCATTCATTTAGTTCATCGAAGGCAGTTGTATTTTCCAATTCGTTGTTTAGTTTCGACATTTTC

¶13610 ¶13620 ¶13630 ¶13640 ¶13650 ¶13660 ¶13670  
ATACATTTGGTTGATAAAAAATAAATAACTACACACAGTACAGTACTCGTACTCGTATTTTTCGAAATT  
ATAAATAACTA A A T GT GTAT AAT  
-----ATAAATAACTAAA-----AATAGT-----GTATA--ATA  
¶11510 ¶11520 ¶11530

¶13680 ¶13690 ¶13700 ¶13710 ¶13720 ¶13730 ¶13740  
GAAATTTGCCAACAAGAAAACTAATAAGAACATCTAAACATTCCTCGGCAGCTAGCAATCCAAG  
AA ATTTT AA AA TAAT AGAA AT ATT TCG AG  
AAATATTTT-----ATAAATTTCTTTTAATAGAA-AT-----ATT--TCGATAG-----  
¶11540 ¶11550 ¶11560 ¶11570

¶13750 ¶13760 ¶13770 ¶13780 ¶13790 ¶13800 ¶13810  
TGAAGTAATCATGTTTAAATGAAACGAGAGAGTAATCAGACGCAAGGCAGCCATATCAGGGCTTCA  
ATG T A AAT AAAC A T AGC TT T AG TTC  
-----ATGATAACAATAAAAC-----ATTTT-----AGCGCTTTTATAGCTTTTCG  
¶11580 ¶11590 ¶11600 ¶11610

¶13820 ¶13830 ¶13840 ¶13850 ¶13860 ¶13870 ¶13880  
AAGAGGGCCTTCCAGGAAAAGATTTCGCAACAGATGGAATCGTGTGGCGTGACTCAATGGGAAACGCGAT  
A A TTC AAA ATT G A AAT T  
TATA-----TTC-----AAATTAAT--GTA-----AATTTT-----  
¶11620 ¶11630

¶13890 ¶13900 ¶13910 ¶13920 ¶13930 ¶13940 ¶13950  
CAACGCAACAGTCGAATGTGCGGATGTGGATGCGGATATGGGACGCAAAATGTCGGAAGATGGAAAT

¶13960 ¶13970 ¶13980 ¶13990 ¶14000 ¶14010 ¶14020  
GACTGATACATCGAATACGTTCAAACAGCCATCTGTTTCCAAGGATCAAAGCAATTTGTCGCGAAAACAA

¶14030 ¶14040 ¶14050 ¶14060 ¶14070 ¶14080 ¶14090  
AAGCCATCCCATCCCTACAACCACAGGAGCAGATCGAACAAAGAGCAAAGCGAACCAAGATATGTA

¶14100 ¶14110 ¶14120 ¶14130 ¶14140 ¶14150 ¶14160  
AAAGGTGCAACAGAAAAGACGAATGCCATCATCGCTCTCCGATGATGGAATTCGGCGAGAAAGCCGCG

¶14170 ¶14180 ¶14190 ¶14200 ¶14210 ¶14220 ¶14230  
CAAAATTAATAAGTATAGCGAACTTAGCTACGGCAGCAATCCAGCATGCGCTTCAAAATGAAACAGCAG

¶14240 ¶14250 ¶14260 ¶14270 ¶14280 ¶14290 ¶14300  
AGCAATGACAAATCAGAATAACAATGACAATGCTGAGGGTAGTGGATTGATCGACAGGAGCGCCAACG

¶14310 ¶14320 ¶14330 ¶14340 ¶14350 ¶14360 ¶14370  
AGTATGTTATCGGTGGCTATCATCCGGTGGCCATTGGCGATGATATCGTAACCCGCTATCATGCTTCAA

¶14380 ¶14390 ¶14400 ¶14410 ¶14420 ¶14430 ¶14440  
AAAGTGGGCTGGGGTCACTTCTCCACCCTGGGCTATGCTATGATACCCAGATGGATCGCTACTGTGCC

¶14450 ¶14460 ¶14470 ¶14480 ¶14490 ¶14500 ¶14510  
GTCAAGGTGTCCAAGTCGGCGCAGCTCTACAGGAAACTGATGATGATGAGATTATGCTCTTTTCCCAAA

¶14520 ¶14530 ¶14540 ¶14550 ¶14560 ¶14570 ¶14580  
TGAGCCTACAGATCAGCATAAGTACAGAGCCACGTGGTGGTTTCTACGATTTCTTTGAAATACC

¶14590 ¶14600 ¶14610 ¶14620 ¶14630 ¶14640 ¶14650  
ACCGCACGGAAGGCACATTTGCCTGGTCTAGAGTTCTCGGTGACAATTTGCTAAAAGTCAATCGA

¶14660 ¶14670 ¶14680 ¶14690 ¶14700 ¶14710 ¶14720  
TGCCTTTTACAAAGGTATGCCCATTTCCAATATCAAGCAATTTGCCAGCAGGTGCTCACGGCCATAAGT

¶14730 ¶14740 ¶14750 ¶14760 ¶14770 ¶14780 ¶14790  
TTCTGACGAAGAGTGGGGATCATACACCCGATCTAAAGCCGGAGAATGTGCTCTCGCGTCCAACGA

¶14800 ¶14810 ¶14820 ¶14830 ¶14840 ¶14850 ¶14860  
GGTCTCCGTTTCGGACCGAGATCAAGACGGCAATTTGAAGTATATTTGAAGGCCAACGAGGGAACTAAGT

¶14870 ¶14880 ¶14890 ¶14900 ¶14910 ¶14920 ¶14930

CCTAGGTATGTTAGATATACTCGTATAATAGCACACATCTGAACACGTATAAACGTTATAGTCCAAAGT

¶14940 ¶14950 ¶14960 ¶14970 ¶14980 ¶14990 ¶15000  
GACCAAAACGGCCAAGAGACGGATGCAGGCAAGTCCAAGAAGGTGATATCGTTTTTCAAGAATCATGCG

¶15010 ¶15020 ¶15030 ¶15040 ¶15050 ¶15060 ¶15070  
CGCATGCTCCCGCAGGCAGGGCATCGAGGATCTGCTCTATCTGGCCGAACCTGGCCATCGAACCGATTAA

¶15080 ¶15090 ¶15100 ¶15110 ¶15120 ¶15130 ¶15140  
CCGCCGCCATGGCCGCTCCGATAACTTACCAATTCATTCCTTCGGCTTCGACGGGTTTATGATGATGAG

¶15150 ¶15160 ¶15170 ¶15180 ¶15190 ¶15200 ¶15210  
CGATGCCGATTGCGGTACGGTGCAGAATTCGAAGTTGCCCGAAATGGAAGGCATGGAATACAAATGCGAC

¶15220 ¶15230 ¶15240 ¶15250 ¶15260 ¶15270 ¶15280  
AGGATAAACCTGTGTTAAAGAGTCCAGAGCTCTCTTGCAGATATGTCCTGATATTAACAAGAAATTTGG

¶15290 ¶15300 ¶15310 ¶15320 ¶15330 ¶15340 ¶15350  
ATGAGAAGGAGCTTAGCACCTCAGGACAAGCGAGCGCCTTACGCGAGCCAGTGGACGTGGCCAGACCAA

¶15360 ¶15370 ¶15380 ¶15390 ¶15400 ¶15410 ¶15420  
AAAGAATGCCAGTCCCGATTGAGATTGGCATCGAATGCTGCATATACGGTATTTATTCACATTTCCAT

¶15430 ¶15440 ¶15450 ¶15460 ¶15470 ¶15480 ¶15490  
TCAAAATTTGAAAAGCTTAGTTTAAAGTATAGGATTAATGAATTCCTCTTGCATTTGAATATTTTGTAG

¶15500 ¶15510 ¶15520 ¶15530 ¶15540 ¶15550 ¶15560  
TCTACTTCTAGTCTGCTTTATGAACGATTTCAATTCCTGCTAATCAGAAATGTTAAATTCAAAAGCTGTGTC

¶15570 ¶15580 ¶15590 ¶15600 ¶15610 ¶15620 ¶15630  
GCATTTCTTATAGAAATAGCATTAGATGTTTTGTGCGTACTCATCAAAAATTCCTCAATTTGAATTAACCA

¶15640 ¶15650 ¶15660 ¶15670 ¶15680 ¶15690 ¶15700  
TTCTTTTTTCACTTCCAAAGACTGGAACCGGTTGGCGATCGAACAGAAAATCAATTTGAACGATATTT

¶15710 ¶15720 ¶15730 ¶15740 ¶15750 ¶15760 ¶15770  
ACCCCATCGATCCGGCCAAACGAATGCGATGTACGGGTGAAGATAGCCGACTTGGCCAAATGCGTGTTA

¶15780 ¶15790 ¶15800 ¶15810 ¶15820 ¶15830 ¶15840  
TTTCCATCATCACTTCACCGACGACATCCAGACCAAGGAGTACCGGGCCCTTGGAGGTGATATCGGTGGG

¶15850 ¶15860 ¶15870 ¶15880 ¶15890 ¶15900 ¶15910  
GGATATTGCGAGACCGCCGATATCTGGAGCTGGCCTGTCTGTTGTGGAGCTGGCCACCGGACCTATFC

¶15920 ¶15930 ¶15940 ¶15950 ¶15960 ¶15970 ¶15980  
TATTCGATACCCATTCGAAAAGGGGCAAAATACAATCTGGATGAGGTCATATAGCGAAAATTCATCGAAAC

¶15990 ¶16000 ¶16010 ¶16020 ¶16030 ¶16040 ¶16050  
CTGTGTCGATACCGTGGTATCTCATCCGCAAGGCAAAACACTCGAGGAAATTTCAATAGCGCCGCGC

¶16060 ¶16070 ¶16080 ¶16090 ¶16100 ¶16110 ¶16120  
AAACTATGCAACATAGAAACCTGAAGCCCTTAAACTGGCCAAATCTTAATCAGATGGTACGGATGGA

¶16130 ¶16140 ¶16150 ¶16160 ¶16170 ¶16180 ¶16190  
GGACTGCCAATCCACGGAATTCGTTAATTTCTCTGATGCCATGCTGCAGACCAATCTTTGTCTCCGAT

¶16200 ¶16210 ¶16220 ¶16230 ¶16240 ¶16250 ¶16260  
ATCCGCAAGCAAGCCTTGGAAAGCCACTACTTATGCAACATTTGCTCTTCTTCCGATTTGACATTTGACAGT

¶16270 ¶16280 ¶16290 ¶16300 ¶16310 ¶16320 ¶16330  
TACTACTATTATAGTGTACGTGAAATCAAGGACTGCACACATACCAAGAGTGAAGAAATAGCGATGAGG

¶16340 ¶16350 ¶16360 ¶16370 ¶16380 ¶16390 ¶16400  
ACAGCAGCAGCTGCAGTTCATAGACAGCAGCGAATTTCCAGCGACGAGGCTCTGATGAGGACGATGT

¶16410 ¶16420 ¶16430 ¶16440 ¶16450 ¶16460 ¶16470  
CAACGAAGAAGACATCAAGAAGTTATATTAACAGTGTATTTATTTAGCGAAAAGCAGCAGTAAACCAT

¶16480 ¶16490 ¶16500 ¶16510 ¶16520 ¶16530 ¶16540  
ATAAGTAATCATATAAACCATATTAGATATTTCAAGTTATAAATAAAGTCTCCGGAGCCATATATATA

¶16550 ¶16560 ¶16570 ¶16580 ¶16590 ¶16600 ¶16610  
CAAAATTTTTCATGTATGTTTATTTAAAACAAAGGTGAAAACAAATTTATGATGAGGTTATATTGTATCA

-----  
\*16620 \*16630 \*16640 \*16650 \*16660 \*16670 \*16680  
CTTTAAGCTGAAAGTCCATCTGTCCGATGAACGTGAAATCTCAGGAAGCTATAAAGCTAGAAGGTGGAG

-----  
\*16690 \*16700 \*16710 \*16720 \*16730 \*16740 \*16750  
ATTAAGCATAGAGATTCTAGAGACATAGACGCGATTTCTTGACACATGTTGCCACGCCCGCTCTAACGCC

-----  
\*16760 \*16770 \*16780 \*16790 \*16800 \*16810 \*16820  
CTCAATGTGTTGATATTTTTTCACAGTTTTATTAGTCTGTGFAAATTTCTATCAATTTGCCAAAAA

-----  
\*16830 \*16840 \*16850 \*16860 \*16870 \*16880 \*16890  
AAAAAAGCTGAAAGTCCATCTGTCCGATGAACGTGAAATCTCAGGAAGCTATAAAGCTAGAAGGTGGAG

-----  
\*16900 \*16910 \*16920 \*16930 \*16940 \*16950 \*16960  
ATCTTATTTCCCAATATCTATCGATATCCGAAAAATGATAACATTTFCGCGTTCGCATTCACACTAGTCTG

-----  
\*16970 \*16980 \*16990 \*17000 \*17010 \*17020 \*17030  
AGTAATGGGTATCTGATAGTCGGGAACTCTCAATATGTTTTATTGATCAATTTTTAAATTAATAATAGT

-----  
\*17040 \*17050 \*17060 \*17070 \*17080 \*17090 \*17100  
TAGATGGATAACTTTAAATAGTTTGGCAGCTTTAAGCTTTGGTATAATGAAATATGGTGAATTTTAA  
A  
-----A

-----  
\*17110 \*17120 \*17130 \*17140 \*17150 \*17160  
AGATAAACC-----AATATG--AAATAAACTACCAATCTTTTCAAGGTATATAATTTACTTTTT  
AGATAAACC AA A G AAATAAACT CAA T TTCAAG TATATAATTT CTTTT

-----  
\*17170 \*17180 \*17190 \*17200 \*17210 \*17220 \*17230  
ATAAATGTTTCATTTTATTCGGGTACACATGATGTCAGTAGTGAACCTTTTACATTTTCGAAACCTGGT  
AT AAAT TTTCAATTTTATTT G GTA A ATGATCTCACTAGTGAACCTTTTACATTTTCGAAACCTGGT  
AT-AAATTTTCATTTTATTTGTTGATATAATGATGTCAGTAGTGAACCTTTTACATTTTCGAAACCTGGT

-----  
\*17240 \*17250 \*17260 \*17270 \*17280 \*17290  
TTAAGGCCTAGTATATAAAGCATTTGGCGCAACACAGCCGAGTTGCCCTGCACA  
TTAAGGCCTA TATAAAGCATTTGGCGCAACACAGCCGAGTTGCCCTGCACA  
TTAAGGCCTAATATAAAGCATTTGGCGCAACACAGCCGAGTTGCCCTGCACAGGAAATTCGGCTAT

-----  
\*17300  
-----ATAGAATTCGGCTAT  
ATAGAATTCGG

-----  
\*17310 \*17320 \*17330 \*17340 \*17350 \*17360 \*17370  
GATTTACCGGATAAATATCGCCTTGTGTTGCTTTTCAATACAAATAGCAAGAGTCATAGAATTCGG---  
\*11850 \*11860 \*11870 \*11880 \*11890 \*11900 \*11910

-----  
\*17380 \*17390 \*17400 \*17410 \*17420 \*17430 \*17440  
CACTGTGCACACCTCGAAGCAAACTCGCACAGGAAGTGCAGGAAAAGTTCCCTTGAGCATTGATGAT  
CAC GTCA ACCTCGAAGCA AACTCGCACA GAAGTCAGGAA AGTTCC TTGAGCACTTGATGAT  
CACGGTGCATACCTCGAAGCAAACTCGCACAGGAAGTGCAGGAAAAGTTCCCTTGAGCATTGATGAT  
\*11920 \*11930 \*11940 \*11950 \*11960 \*11970 \*11980

-----  
\*17450 \*17460 \*17470 \*17480 \*17490 \*17500 \*17510  
ATGCTGGAGTTCAGTAGAGTCTTAGCCAGCTTCCATTCCTTTTCGTGGTCCCAACAATGTTGGTCT  
ATGCTGGAGTTCAGTAGAGTCTTAGCCAGCTTCCATTCCTTTTCGTGGTCCCAACAATGTTGGTCT  
\*11990 \*12000 \*12010 \*12020 \*12030 \*12040 \*12050

-----  
\*17520 \*17530 \*17540 \*17550 \*17560 \*17570 \*17580  
TCTTCAGTATTTCCGGTAAATGGTGAATCTTCGCCAGAGTTTCGTGCAATGAGCAAAATACGTGGTGA  
TCTTCAGTATTTCCGGTAAATGGTGAATCTTCGCCAGAGTTTCGTGCAATGAGCAAAATACGTGGTGA  
TCTTCAGTATTTCCGGTAAATGGTGAATCTTCGCCAGAGTTTCGTGCAATGAGCAAAATACGTGGTGA  
\*12060 \*12070 \*12080 \*12090 \*12100 \*12110 \*12120

-----  
\*17590 \*17600 \*17610 \*17620 \*17630 \*17640 \*17650  
GGTGTAAAGTAAGTACACCGCAGTGTTCGCCGATCCTCAAGCATCTTATCGAAGCAAAATATATAGTCTG  
GGTGA AGTAAGTACACCGCAGTGTTCGCCGATCCTC AGCATCTTATC AACGAAAATATATAGTCTG  
GGTGTAAAGTAAGTACACCGCAGTGTTCGCCGATCCTCAAGCATCTTATCGAAGCAAAATATATAGTCTG  
\*12130 \*12140 \*12150 \*12160 \*12170 \*12180 \*12190

-----  
\*17660 \*17670 \*17680 \*17690 \*17700 \*17710 \*17720  
CTGATCCGGTTGTGACATAAATCCGAATACTTAATGCATCCATATGCCAGCGACTTTGGGCGTCCCTTCA  
CTGAT CCGGTTGTGACATAAATCCGAATACTTAATGCATCCATATGCCAGCGACTTTGGGCGTCCCTTCA  
CTGATCCGGTTGTGACATAAATCCGAATACTTAATGCATCCATATGCCAGCGACTTTGGGCGTCCCTTCA  
\*12200 \*12210 \*12220 \*12230 \*12240 \*12250 \*12260

-----  
\*17730 \*17740 \*17750 \*17760 \*17770 \*17780 \*17790  
GTTCCGTGGGCGTGGAGACCTTATCGCGCCAGACTTCCAAATTCGTCGAGGATCGCTTCAATCCCTC  
GTTCCGTGGGCGTGGAGACCTTATCGCGCCAGACTTCCAAATTCGTCGAGGATCGCTTCAATCCCTC  
GTTCCGTGGGCGTGGAGACCTTATCGCGCCAGACTTCCAAATTCGTCGAGGATCGCTTCAATCCCTC  
\*12270 \*12280 \*12290 \*12300 \*12310 \*12320 \*12330

-----  
\*17800 \*17810 \*17820 \*17830 \*17840 \*17850 \*17860  
ATCCAGCAAAATCGGACAGCTTAACCGTATCACCCGATCGAGTCTTAACTTCTGCCATCCTCGCCGAGA  
TCCAGCAAAATCGGACAGCTTAACCGTATCACCCGATCGAGTCTTAACTTCTGCCATCCTCGCCGAGA  
GTTCCAGCAAAATCGGACAGCTTAACCGTATCACCCGATCGAGTCTTAACTTCTGCCATCCTCGCCGAGA  
\*12340 \*12350 \*12360 \*12370 \*12380 \*12390 \*12400

-----  
\*17870 \*17880 \*17890 \*17900 \*17910 \*17920 \*17930  
ACGAGCCAAACTGTACGTGGTCAACACAGTGGCTGAGTGGATTTAGGATAGCAGATGCTTCGGCACTT  
ACGAGCCAAACTGTACGTGGTCAACACAGTGGCTGAGTGGATTTAGGATAGCAGATGCTTCGGCACTT  
ACGAGCCAAACTGTACGTGGTCAACACAGTGGCTGAGTGGATTTAGGATAGCAGATGCTTCGGCTGCT  
\*12410 \*12420 \*12430 \*12440 \*12450 \*12460 \*12470

-----  
\*17940 \*17950 \*17960 \*17970 \*17980 \*17990 \*18000  
GATTTACCGGATAAATATCGCCTTGTGTTGCTTTTCAATACAAATAGCAAGAGTCATAGAATTCGG---  
\*11850 \*11860 \*11870 \*11880 \*11890 \*11900 \*11910

-----  
\*17310 \*17320 \*17330 \*17340 \*17350 \*17360 \*17370  
GATTTACCGGATAAATATCGCCTTGTGTTGCTTTTCAATACAAATAGCAAGAGTCATAGAATTCGGTGA  
T AA  
-----TAAA

5b)

CG32582: melanogaster (above), erecta (below)  
Martinez/Needleman-Wunsch DNA Alignment  
Minimum Match: 9; Gap Penalty: 1.10; Gap Length Penalty: 0.33

110 120 130 140 150 160 170  
 CAAGAGTCCGCAATCATCAGCAGTATCAACAGTATCAACAGCATCAGCAACACCCAGCAACATCGGCAAC  
 CAAGAGTCCGCAAG  
 -----  
 980 990  
 180 190 200 210 220  
 ATCAGCAACATCA-----GCAACATCGGCAGCAGCAATAGCAACACTATCGCACTAAAAATGTG  
 GCAACATCA GCA CATCG CAGCAGCAA AGCAA AC ATCGCACTAAAAATGTG  
 ---GCAACATCATCAGCAATATCAGCAGCATCGACAGCAGCAACAGCAATACCATCGCACTAAAAATGTG  
 100 110 120 130 140 150  
 1130 1140 1150 1160 1170 1180 1190  
 GCGAGCGCAATATGAAAACCGAGAACTATCCGTTGCTGGCGCCACAAATTAACAAGCAATCACTACCTC  
 CGAC GCA TAT AA A CAGGAAC ATCCGTTGCTGG GC ACAATATCAAGCAATCACTACCTC  
 ACAGCAGCATTATTAAGAACAGGAACCCATCCGTTGCTGGTGTACAAATTAACAAGCAATCACTACCTC  
 1160 1170 1180 1190 1200 1210 1220  
 1200 1210 1220 1230 1240 1250 1260  
 ACCGCAACATCAACGGATATCGATGCTTACAGCAGCACTCAAGTGGAGGAGGTTATTTATACACAGTCA  
 ACCGCA CATCATACGGA ATCGATGCTTAC GCACTCAAGTGGAGGAGGTTATTTATACACAGTCA  
 ACCGCAACATCAACGGAAATCGATGCTTACCGCACTCAAGTGGAGGAGGTTATTTATACACAGTCA  
 1230 1240 1250 1260 1270 1280 1290  
 1270 1280 1290 1300 1310 1320 1330  
 CAAGGGAATACCAAGTATCAATTAAGACCGGAACAAGCATTGGCTCCCAAGTCAAGAGCCAACTCC  
 CAAGG AATACCAAGT TA CAATTAAGAC CCGAA CAAGCATTGCTCCCAAGTCAAGAGCCAACTCC  
 CAAGGCAATACCAAGTATCAATTAAGACCGGAATCAAGCATTGGCTCCCAAGTCAAGAGCCAACTCC  
 1300 1310 1320 1330 1340 1350 1360  
 1340 1350 1360 1370 1380 1390 1400  
 AGCAGCAACATACCGCCTATGAGGATCGTACAGTGCAGCTCCTGCCACCGTATAATCTATGTATCGGCAA  
 AGCAGCAACATACCGCCTATGAGGATCGTACAGTGCAGCTCCTGCCACCGTATAATCTATGTATCGGCAA  
 AGCAGCAACATACCGCCTATGAGGATCGTACAGTGCAGCTCCTGCCACCGTATAATCTATGTATCGGCAA  
 1370 1380 1390 1400 1410 1420 1430  
 1410 1420 1430 1440 1450 1460 1470  
 CAAGCAACCAACCAATTCGAGGCTGAGCAACACGAAACAGCAACAGCAACAGCAACAGCAACAGCAAC  
 CAAGCAACCAACCAATTCGAGGCTGAG A G ACA GAACA GA CAGCAACAGCAACAGCAACAGCAAC  
 CAAGCAACCAACCAATTCGAGGCTGAGGCTGAGGCAACAGCAACAGCAACAGCAACAGCAACAGCAAC  
 1440 1450 1460 1470 1480 1490 1500  
 1480 1490 1500 1510 1520 1530 1540  
 GAATCGGATCAGGAACAGCAAGCAACTGGGGAACACGGGCTATGAGCAGTTCCTGAAATGTGCGGCTC  
 GAA CAGGAACAGCAGAGCAACTGGGGAACAC GCTATGAGCAGTTCCTGAAATGTGCGGCTC  
 GAA-----CAGGAACAGCAGAGCAACTGGGGAACACGAGCTATGAGCAGTTCCTGAAATGTGCGGCTC  
 1510 1520 1530 1540 1550 1560 1570  
 1550 1560 1570 1580 1590 1600 1610  
 ATGAATTCAGAAAATCAGCAGCGCTCCGGCTGCTCTAAATCTCAGCAGTATGGCGAAAAGAAC  
 ATGAATTC GAA CTCAGACA GCTCCGGCTGCTCTAAATCTCAGCAGTATGGCGAAAAGAAC  
 ATGAATTCAGAAAATCAGCAGCGCTCCGGCTGCTCTAAATCTCAGCAGTATGGCGAAAAGAAC  
 1580 1590 1600 1610 1620 1630 1640  
 1620 1630 1640 1650 1660 1670 1680  
 GGCATGCTGGCTCAATCCAGACGGATCTGAAGATCCGCAAGTTCGCAATCTCCGAGGCTCAAT  
 GGCATGCTGGCTCAATCCAGACGGATCTGAAGATCC CAGAGTTCGCAATCTCCGAGGCTCAAT  
 GGCATGCTGGCTCAATCCAGACGGATCTGAAGATCC CAGAGTTCGCAATCTCCGAGGCTCAAT  
 1650 1660 1670 1680 1690 1700 1710  
 1690 1700 1710 1720 1730 1740 1750  
 GCGACAGCGCGGAGGATCCACAGCAGGACCCACGCCGATGGAATCAGTAACAAGGCCCTGAGCCCT  
 GCGAC GCGCGAGGATCC CAGGACCCA GCGATGGAATCAGTAACAAGGCCCTGAGCCCT  
 GCGACAGCGCGGAGGATCC-----CAGGACCCACTCGCATGGAATCAGTAACAAGGCCCTGAGCCCT

9720 9730 9740 9750 9760 9770  
 1760 1770 1780 1790 1800 1810 1820  
 GAGCGCCATATAATACCACAGCCTTTAAGCAAGGTTGAGGCTATTTTTAAGGTTAGAAATACGATTGC  
 GAGCGCCATATAATACCACAGCCTTTAAGCAAGGTTGAGGCT ATTTTAAAGGTTAGAAATACGATTGC  
 GAGCGCCATATAATACCACAGCCTTTAAGCAAGGTTGAGGCTAATTTTTAAGGTTAGAAATACGATTAT  
 1780 1790 1800 1810 1820 1830 1840  
 1830 1840 1850 1860 1870 1880 1890  
 AAGGAACGACACAATCAGAGCTTTTGTGTTCCACCCAAAACAGAAAGAAAAAATGAAAAA  
 AAGGAACGACAC ATCAGAGCTTTTGTGTTCCACCCAAA GAGAA GAAAA  
 AAGGAACGACACCATCAGAGCTTTTGTGTTCCACCCAAA-GAGAAATGAAAA-----  
 1850 1860 1870 1880 1890 1900  
 1900 1910 1920 1930 1940 1950 1960  
 CACATGCGAGGGAACAATGGAAGAGCCTCAAACAAGAGATGATGATTGGTGTTCAGTATCGAAATCAG  
 CATGGCAGG GACA GGAAGAGCCTCAAACAAGAGATGATGATTGGTGTTCAGTATCGAAATCAG  
 ---CATGGCAGGTCACAACGGAAGCCTCAAACAAGAGATGATGATTGGTGTTCAGTATCGAAATCAG  
 1910 1920 1930 1940 1950 1960  
 1970 1980 1990 1000 1010 1020 1030  
 ATTTTTATTGTGCAAAAATAAAAATGATCATATTTTATGTTACAATCATTGAAAGACTCAAAAACA  
 ATTTTTATTGTGCAAAAATAAAA TGATCATATTTTATGTTACAATCATTGAAAGACTC AAACA  
 ATTTTTATTGTGCAAAAATAAAAAGTGTATCATATTTTATGTTACAATCATTGAAAGACTC----AAACA  
 9970 9980 9990 1000 1010 1020 1030  
 1040 1050 1060 1070 1080 1090 1100  
 ACCGACTTAGTTCAGCATAGAGTCTTCTGTAAAATTGTACTATA-ATACATAAAAACAAAAA  
 ACCGACTTAGTTCAGCATAGAGTCTTCTGTAAAATTGTACTATA ATACAT  
 ACCGACTTAGTTCAGCATAGAGTCTTCTGTAAAATTGTACTATAATACAT-----  
 1040 1050 1060 1070 1080 1090  
 1110 1120 1130 1140 1150 1160 1170  
 ACAAAAAATAAATACATTTAAATGATCTCAAGTCTACTTAAACATATTTTTTGTATATTTTTTTT  
 AAAAAAATACATTTAAATGATCTCAAGTCTTAAACATATTTTTTGTATATTTTTTTT  
 -----AAAAAATAAATACATTTAAATGATCTCAAGTCTTAAACATATTTTTTGTATATTTTTTTT  
 1100 1110 1120 1130 1140 1150  
 1180 1190 1200 1210 1220 1230 1240  
 ATGAAAACCTTACAAAATCCTAAAAACG AAAA AAAC AAA AATGAA G AGGAGTGCCTGCTC  
 ATGAAAACCTTACAAAATCCTAAAAACG AAAA AAAC AAA AATGAA G AGGAGTGCCTGCTC  
 ATGAAAACCTTACAAAATCCTAAAAACG-AAAAAAGCAAAA-----AATGAA-GAGGAGTGCCTGCTC  
 1160 1170 1180 1190 1200 1210  
 1250 1260 1270 1280 1290 1300 1310  
 GCTGATTTTAAAAAGTAGCAAACTAAGAGTATATATATTGAATATATGTTTGAACAAGAAACCGCGCA  
 GCTGATTTTAAAAAGTAGCAAACTAAGAGTATATAT TGA TAATATGTTTGAACAAGAAACCGCGC  
 GCTGATTTTAAAAAGTAGCAAACTAAGAGTATATAT--TGACTAATATGTTTGAACAAGAAACCGCGC  
 1220 1230 1240 1250 1260 1270 1280  
 1320 1330 1340 1350 1360 1370 1380  
 AAAGAAACAGATACAATATAGTTTTCCGAAATACCAATTTAGATATGCATGGTGCAGTAAAGATTAA  
 AAAGAAACAGATACAATATAGTTTTCCGAAATACCA TTAGATATGCATGGTGCAGTAAAGATTAA  
 1290 1300 1310 1320 1330 1340 1350  
 1390 1400 1410 1420 1430 1440 1450  
 AGCCATTTTTTTTTATATAACAGCCTTGGCTAAGGCTACAAAATGATAGAAAATAACGTTAGTTTTTA  
 AGCCATTTTTTTT ATATAACAGC TTGC TAAGGCTACA AATGATATAGAAAATA GTAGTT TA  
 AGCCATTTTTTTT-ATATAACAGCTTTGTCATAGGCTACACAATGATAGAAAATAATATGTTAGTTATA  
 1360 1370 1380 1390 1400 1410 1420  
 1460 1470 1480 1490 1500 1510  
 TTTTATTCAAGCTCTCAAGCTTAACTCTCATTTAGCAACTGTGCTGAGCAGTCAAAA-----  
 TTTTATTCAAGCTCTCAAGCTTAACTCTCATTTAGCAA GTGCTGAGCAGTCA  
 TTTTATTCAAGCTCTCAAGCTTAACTCTCATTTAGCAAGAGTCTGAGCAGTCAAGGCTAGAGCCAAATC  
 1430 1440 1450 1460 1470 1480 1490  
 1520 1530 1540 1550 1560 1570  
 -----GGGAAGGCCAAGTTGCCAACT---AGTTTATGATTGCTGGCTGAGTTAGCGGTATATGG  
 GGG A G CAGGTTG CAAC AGTTTATGATTGCTGGCTGAGT A GCTGATATGG  
 AGCAGACGCGGATCAGCAAGTTGACARCCATGCACTTTAGATTTGCTGGCTGAGTGAATCAGTATATGG  
 1500 1510 1520 1530 1540 1550 1560



TGTCGAGCTATTTTGTAAATTCCTTCAGTTTTAGTTACTCCAGAAACCATCGAGAAAATATCTTCC  
TGTCGAG TATTTTGTAAATTCCTTCA TTTA ACTCCA GAAC TCGAGAAAAT ATCTTCC  
TGTCGAGATATTTTGTAAATTCCTTCA--TTTA---ACTCCATGAACCTTTCGAGAAAATGATCTTCC  
\*3130 \*3140 \*3150 \*3160 \*3170 \*3180  
\*3230 \*3240 \*3250 \*3260 \*3270 \*3280 \*3290  
CMAAAGCCCTATGCT--CGGTCTTAAGCAAATTTAAATTTGGTTTTCAAAAAGGTCAAATATGAA  
CC ATGCCCTATGCTT C GCTCAAAGCAAATTT AATTTGGTTTTT AS T TAA  
CCTCATGCCCTATGCTTTTCAGTCTTAAGCAAATTTCAATTTGGTTTTTCG----AGTTATCTTACTAA  
\*3190 \*3200 \*3210 \*3220 \*3230 \*3240 \*3250  
\*3300 \*3310 \*3320 \*3330 \*3340 \*3350 \*3360  
AAATATAAAAAACCAACCTTTTCGACACCTCCGATACTTTAAACCGACTGCACAAATACATAGTAAATATG  
AA TAA AA AAACCAACCTTTTCA ACCCTC ATACTTTAAACCGACTGCACAAATACATAGTAAATATG  
AACTAA--AAGAAACCAACCTTTTCAACCTCAACTTTTAAACCGACTGCACAAATACATAGTAAATATG  
\*3260 \*3270 \*3280 \*3290 \*3300 \*3310 \*3320  
\*3370 \*3380 \*3390 \*3400 \*3410 \*3420 \*3430  
ATAAAAAGTAAATATCTGTTTATAATTTGAATAAAGAGTGTCTAAATATCAAAACATATAATCAATTT  
ATAAAAAGTAAATATCTGTTTATAATTTGAATAAAGAGTGTCTAAATATCAAAACATATAATCAATTT  
ATAAAAAGTAAATATCTGTTTATAATTTGAATAAAGAGTGTCTAAATATCAAAACATATAATCAATTT  
\*3330 \*3340 \*3350 \*3360 \*3370 \*3380 \*3390  
\*3440 \*3450 \*3460 \*3470 \*3480 \*3490 \*3500  
TAACCTGTCAAAACAAACAAAATTTGGATTGTAATTTGCAATGCTTTAAATATAATGATGTTCAAGATT  
TAACCTGTCAAA CAACCAAAA TT GATCTTAATTTCAATGCTTTAAAT TAATGATGTTTCAAGATT  
TAACCTGTCAAA--CAACCAAAAATTTGATTTTAATGCAATGCTTTAAATTAATGATGTTCAAGATT  
\*3400 \*3410 \*3420 \*3430 \*3440 \*3450 \*3460  
\*3510 \*3520 \*3530 \*3540 \*3550 \*3560  
ATGTTTACTG-----TGTGTTTCGTTTTGGTAATTTTGGCCACATGCAATTAATAGATTTAT  
AT TACTG TGTGTTTCGTTTTGGTAATTTTGGCCACATGCAATTAATAG TTTAT  
ATA--TACTGTTGTTGTTGTTGTTTCGTTTTGGTAATTTTGGCCACATGCAATTAATAGTATTAT  
\*3470 \*3480 \*3490 \*3500 \*3510 \*3520 \*3530  
\*3570 \*3580 \*3590 \*3600 \*3610 \*3620 \*3630  
TTCCTATTTATTGGTATTCCTTTAATGCTGATACATTTGTTTTAAAGTTGTTTATGATGATCAATTT  
TTCCTATTTATTGGTATTCCTTTAATGCTGATACATTTGTTTTAA TGTGTTTGGAT T TC T AT  
TTCCTATTTATTGGTATTCCTTTAATGCTGATACATTTGTTTTAAAGTTGTTTATGATGCTTCTCAT  
\*3540 \*3550 \*3560 \*3570 \*3580 \*3590 \*3600  
\*3640 \*3650 \*3660 \*3670 \*3680 \*3690 \*3700  
CGGGCAGCTTCCAAAGTAGGATAGCCCATGTTGCGTCTCTGCGCCGTTTACCGTTTCGTCACCA  
CGG GCA TCTCAAGTAGGATAGCCCATGTTGCGTCTCTGCGCC GTTTACCGTTTCGTCACCA  
CGGGTCAAATCTCAAGTAGGATAGCCCATGTTGCGTCTCTGCGCCGTTTACCGTTTCGTCACCA  
\*3610 \*3620 \*3630 \*3640 \*3650 \*3660 \*3670  
\*3710 \*3720 \*3730 \*3740 \*3750 \*3760 \*3770  
GTTGGATAATTTCTGTCATATTTGGAGGAATGCCAATGCTGGCCAGCGGTGATCATCAATGTTGGCT  
GTTGGATAATTTCTGTCATATTTGGAGG AT CCAATGCTGGCCAGCGGTGATCATCAATGTTGGCT  
GTTGGATAATTTCTGTCATATTTGGAGGATTTCCCAATGCTGGCCAGCGGTGATCATCAATGTTGGCT  
\*3680 \*3690 \*3700 \*3710 \*3720 \*3730 \*3740  
\*3780 \*3790 \*3800 \*3810 \*3820 \*3830 \*3840  
CCATCGAATAATGTTTTGTGCTCAGTGGAAATCTCTCTCTCTGCGCTGAGCTCTGTTCAACTTCAG  
CCATCGAATAATGTTTTGTGCTCAGT GA TCGTCTCTCTCTCTGCGCTGAGCTCTGTTCAACTTCAG  
CCATCGAATAATGTTTTGTGCTCAGTGGAAATCTCTCTCTCTGCGCTGAGCTCTGTTTAACTTCAG  
\*3750 \*3760 \*3770 \*3780 \*3790 \*3800 \*3810  
\*3850 \*3860 \*3870 \*3880 \*3890 \*3900 \*3910  
TTTTGCCACCTTTGTTGTTATTCGCGCAGAACCTGAAAACATACACCAAATTAATATGCCATCCAGTA  
TTTTGCCACCTTTGTTGTTATTCGCGCAGAACCT GAAAACATACACCAAATTAATATGCCATCCAGTA  
TTTTGCCACCTTTGTTGTTATTCGCGCAGAACCTGAAAACATACACCAAATTAATATGCCATCCAGTA  
\*3820 \*3830 \*3840 \*3850 \*3860 \*3870 \*3880  
\*3920 \*3930 \*3940 \*3950 \*3960 \*3970 \*3980  
GCTATGCTAAGAAATGGATGACTCGAATCAAAATAGGGCATGGCAAAATCAACGATTTTGTGTTCCAGG  
GCTATGCT AAGAAATGGATGACTCG AT AAATAGGGCATGGCAAAATCAACGATTTTGTGTTCCAGG  
GCTATGCTAAGAAATGGATGACTCGAATCAAAATAGGGCATGGCAAAATCAACGATTTTGTGTTCCAGG  
\*3890 \*3900 \*3910 \*3920 \*3930 \*3940 \*3950  
\*3990 \*4000 \*4010 \*4020 \*4030 \*4040 \*4050  
CCAATCCAGATAACATCAGGGCCGACGAGTCTTAACACTGGAAATTCATACATACATTTAATAAAA

CCAACTCCAA AT ACATCAGGGCCGAGCAAGTCGTA CACTG AAATTCATACA A ATATTAAT AAA  
CCAACTCCAAAATGACATCAGGGCCGAGCAAGTCGTAAGCACTGTAATTCATACAGATATATTAATAA  
\*3960 \*3970 \*3980 \*3990 \*4000 \*4010 \*4020  
\*4060 \*4070 \*4080  
-----ACAATTTAAATTTG-----TTTATTTACT-----TGTAGTACC  
A TT A ATTT TTTAT TC  
GAGTCTATCTTTACATTTTTTGGACACTGCTGTTGCTTTAATTTGAATTTATTCATTTATCTTCGACC  
\*4030 \*4040 \*4050 \*4060 \*4070 \*4080 \*4090  
\*4090 \*4100 \*4110 \*4120 \*4130 \*4140 \*4150  
CACCTGATAAAGACAAGCTGCAAAACAATCGTAAGCTCAGCTTCTAGGAACCAACCAACCTCTTCG  
CACCTGATAAAGACAAGCTGCAAAACAATCGTAAGCTCAGCTTCTAGGAACCAACCAACCTCTTCG  
CACCTGATAAAGACAAGCTGCAAAACAATCGTAAGCTCAGCTTCTAGGAACCAACCAACCTCTTCG  
\*4100 \*4110 \*4120 \*4130 \*4140 \*4150 \*4160  
\*4160 \*4170 \*4180 \*4190 \*4200 \*4210 \*4220  
GCAATATCTTGCCTGCAAGATTTCGGCGGGTACTCTCATAGCATCTTGTAGAGTTTATCCTTTTTGCGAGA  
GCAATATCTTGCCTGCAAGATTTCGGCGGGTACTCTCATAGCATCTTGTAGAGTTT TCCTTTTTGCGAGA  
GCAATATCTTGCCTGCAAGATTTCGGCGGGTACTCTCATAGCATCTTGTAGAGTTTTCCTTTTTGCGAGA  
\*4170 \*4180 \*4190 \*4200 \*4210 \*4220 \*4230  
\*4230 \*4240 \*4250 \*4260 \*4270 \*4280 \*4290  
GCTCAAGCTCTGTTTCCAGGATTTTCTCAAAATTTGCAATGCAAAAATTTGATAAGCTTAAAGTG  
GCTCAAGCTCTGTTTCCAGG TTTATTTCTTA AT AATG AA A T TGT TTA GGG  
GCTCAAGCTCTGTTTCCAGGATTTTCTCAAAATTTGCAATGCAAAAATTTGATAAGCTTAAAGTG  
\*4240 \*4250 \*4260 \*4270 \*4280 \*4290  
\*4300 \*4310 \*4320 \*4330 \*4340 \*4350 \*4360  
CATACATGACG--ATATGGCTCTCACTCACCTTGTACAAGTAGGGCGCACTCTACGGAATTCGGTAA  
CA A AT CA C ATATG TC ACTCACCTTGTACAAGTAGGGCGCACTCTACGGAATTCGGTAA  
CAAATATACCAAATATGG--TCA--ACTCACCTTGTACAAGTAGGGCGCACTCTACGGAATTCGGTAA  
\*4300 \*4310 \*4320 \*4330 \*4340 \*4350 \*4360  
\*4370 \*4380 \*4390 \*4400 \*4410 \*4420 \*4430  
GTTCCGCTTTTCGAGTTTCTGTCGCAACCGCAATGTTGCTCAAGTTATCAAAATCCATCGCAATTTGCGG  
GTTCCGCTTTTC AGTTTCTGTCGCAACCGCAATGTT TCAAGTT TCAAAATCCATCGA TGGG  
GTTCCGCTTTTCAAGTTTCTGTCGCAACCGCAATGTTATCAAGTTGTCAAATCCATCGCAATTTGCGG  
\*4370 \*4380 \*4390 \*4400 \*4410 \*4420 \*4430  
\*4440 \*4450 \*4460 \*4470 \*4480 \*4490 \*4500  
CAGACCTGCTGATCTCTCTGTCGATTAAGATCCGTTTCAGGCTTCGTTGATGCTTGTATTGAGA  
CAGACCTGCTGATCTCTCTGTC ATTAAGATCCGTTTCAGGCTTCGTT ATGCTTGTATTGAGA  
CAGACCTGCTGATCTCTCTGTCATTAAGATCCGTTTCAGGCTTCGTTGATGCTTGTATTGAGA  
\*4440 \*4450 \*4460 \*4470 \*4480 \*4490 \*4500  
\*4510 \*4520 \*4530 \*4540 \*4550 \*4560 \*4570  
GATTGGACTGAACGCAGATAAGCTTGCAGATGGCAAAATAGCGGTTTTGGAGAATACTAACAGCAC  
GATTGGACTGAACGCAGATAAGCTTGCAGAG GCAAAATAGCGGTTTGGAGAATACTAACAGCAC  
GATTGGACTGAACGCAGATAAGCTTGCAGAGGGGCAAAATAGCGGTTTTGGAGAATACTAACAGCAC  
\*4510 \*4520 \*4530 \*4540 \*4550 \*4560 \*4570  
\*4580 \*4590 \*4600 \*4610 \*4620 \*4630 \*4640  
GAGTGTGATCTCTGCTGTCGCAACCGCAATGTTGCTCAAGTTATCAAAATCCATCGCAATTTGCGG  
GAGTGTGATCTCT GCTGTCGCAACCGCAATGTTGCTCAAGTTATCAAAATCCATCGCAATTTGCGG  
GAGTGTGATCTCTGCTGTCGCAACCGCAATGTTGCTCAAGTTATCAAAATCCATCGCAATTTGCGG  
\*4580 \*4590 \*4600 \*4610 \*4620 \*4630 \*4640  
\*4650 \*4660 \*4670 \*4680 \*4690 \*4700 \*4710  
GAATTCGATGCTTGTAGTACAGCTCAATGTTGGCTACCTTGGTGATAATGCTCTTAAAGTCCCTCAG  
GAATTCGAT GCTTGTAGTACA CTCAATGTTGGC ACTTGGTGAT ATGCTCTT AAGT CCCT  
GAATTCGATGCTTGTAGTACAACCTCAATGTTGGCCACCTTGGTGATGATGCTCTTAAAGTCCCTCAG  
\*4650 \*4660 \*4670 \*4680 \*4690 \*4700 \*4710  
\*4720 \*4730 \*4740 \*4750 \*4760 \*4770 \*4780  
CGCCACGCTTCCGTTGGATGAGCCATATGGCCAGGACGGCTTATGCTACTCTCTGCTACTTATCGTACA  
CGCCACGCTTCCGTTGGATGAGCCATATGGCCAGGACGGCTTATGCTACTCTCTGCTACTTATCGTACA  
CGCCACGCTTCCGTTGGATGAGCCATATGGCCAGGACGGCTTATGCTACTCTCTGCTACTTATCGTACA  
CGCCACGCTTCCGTTGGATGAGCCATATGGCCAGGACGGCTTATGCTACTCTCTGCTACTTATCGTACA  
\*4720 \*4730 \*4740 \*4750 \*4760 \*4770 \*4780  
\*4790 \*4800 \*4810 \*4820 \*4830 \*4840 \*4850  
GGAAACACGCTCCGCAACCAAGTGGCGGATTCAGGCAACGCAAGCTTTTGGATGTTTAAACCGGAGA  
GGAA ACACGCTCCGCAACCAAGTGGCGGATTCAGGCAACGCAAGCTTTTGGATGTTTAAACCGGAGA



GGATAACAGCTCCGACCACAAGTAGCCGATTCAGCGGCACGAGAAGTTTGAATGTTAAACGGGAGA  
94790 94800 94810 94820 94830 94840 94850  
14860 14870 14880 14890 14900 14910 14920  
CCGAGACAGCTCCAAGTTCGGCCATTTTGAAGGTTTGAATTTTGAATAAAGTATAGCTAATTCGGTG  
CCGAGACAGCTCCAAGTTC C GCAATTTTGAAGGTTTGAATTTTGAATAAAGTATAGCTAATTCGGTG  
CCGAGACAGCTCCAAGTTCCTCCGCAATTTTGAAGGTTTGAATTTTGAATAAAGTATAGCTAATTCGGTG  
94860 94870 94880 94890 94900 94910 94920  
14930 14940 14950 14960 14970 14980 14990  
AACATTCCTCCATGTGGCCAGCTTCCAGCCCAAAGCCGACTCGATGAGCCCAATCAATTCATCGAATATC  
AACATTCCTCCATGTGGCCAGCTTCCAG CCAAAAGCCGACTCGATGAGCCCAATCAATTCATCGAA  
AACATTCCTCCATGTGGCCAGCTTCCAGTCCCAAAGCCGACTCGATGAGCCCAATCAATTCATCGAATATC  
94930 94940 94950 94960 94970 94980 94990  
15000 15010 15020 15030 15040 15050 15060  
CACGGTTTTGATAGTGTAAATCAGATCTCTAGCTCAATCGGCATGACCAACAATGTCCAGGGCCACAT  
C CGGTT TGATAGTA TTAATCAGATCTCT AGCTCAATCGGCATGACCAACAATGTCCAG CC CACAT  
CCCGCTTCTGATAGTAATAATCAGATCTCTAGCTCAATCGGCATGACCAACAATGTCCAGACACACAT  
95000 95010 95020 95030 95040 95050 95060  
15070 15080 15090 15100 15110 15120 15130  
CTGAGCTAGCCTAAACTCTTCGGCGTCCACGAGGCCAAGCACACTCTCCATGTGGCGTTGAGTGT  
CTGAGCTAGCCTAAACTCTTCGGCGTCCACGAGGCCA CACACTCTCCATGTGGCGTTGAGTGT  
CTGAGCTAGCCTAAACTCTTCGGCGTCCACGAGGCCAAGCACACTCTCCATGTGGCGTTGAGTGT  
95070 95080 95090 95100 95110 95120 95130  
15140 15150 15160 15170 15180 15190 15200  
GCTTTCGGCCGAGTCCACGGCCCTTGAAGTCTCTCAGGTAGACAAAGTATGGCCAGACGGCCAA  
GCTTTCGGCCGAGTCCACGGCCCTTGAAGTCTCTCAGGTAGACAAAGTATGGCCAGACGGCCAA  
GCTTTCGGCCGAGTCCACGGCCCTTGAAGTCTCTCAGGTAGACAAAGTATGGCCAGACGGCCAA  
95140 95150 95160 95170 95180 95190 95200  
15210 15220 15230 15240 15250 15260 15270  
AGTGTCTACATTTGTGTACAGTAGCTTCGTCTGATCGATCGATCGATCGATCGATCGATCGATCGAT  
AGTGTCTACATTTGTGTACAGTAGCTTCGTCTGATCGATCGATCGATCGATCGATCGATCGATCGAT  
AGTGTCTACATTTGTGTACAGTAGCTTCGTCTGATCGATCGATCGATCGATCGATCGATCGATCGAT  
95210 95220 95230 95240 95250 95260 95270  
15280 15290 15300 15310 15320 15330 15340  
CTTCTGGATATCGGCATGTTGGGACCCGAAATGAATCTCTCCAGATCGGCCAGACGTCCTCAAGTCCGCA  
CTTCTGGATATCGGCATGTTGGGACCCGAAATGAATCTCTCCAGATCGGCCAGACGTCCTCAAGTCCGCA  
95280 95290 95300 95310 95320 95330 95340  
15350 15360 15370 15380 15390 15400 15410  
TAGGCATAGATCAATTCGCTCGATGAAGATTCCGGCGCTTCTTGGCGCCATTTGCGATAGCGGAA  
TAGGCATA ATCAATTCGCTCGATGAAGATTCCGG GCCTTTCGCGCCATTTGCGATAGCGGAA  
TAGGCATAAATCAATTCGCTCGATGAAGATTCCGGCGCTTCTTGGCGCCATTTGCGATAGCGGAA  
95350 95360 95370 95380 95390 95400 95410  
15420 15430 15440 15450 15460 15470 15480  
CGAGTATCCCAAGACTCCACTTCGTGGCCACATCGAACATCGAGCTAAGCCCTCGGATCATCAGC  
CGAGTATCCCAAGACTTCGTGGCCACATCGAACATCGAGCTAAGCCCTCGGATCATCAGC  
CGAGTATCCCAAGACTCCACTTCGTGGCCACATCGAACATCGAGCTAAGCCCTCGGATCATCAGC  
95420 95430 95440 95450 95460 95470 95480  
15490 15500 15510 15520 15530 15540 15550  
CTTAGTACGATCGATAGCCTCTTGGACCAAGCCGCTGAGTGGGCTTGGCCAGCTGAGACCAA  
CTTAGTACGATCGATAGCCTCTTGGACCAAGCCGCTGAGTGGGCTTGGCCAGCTGAGACCAA  
CTTAGTACGATCGATAGCCTCTTGGACCAAGCCGCTGAGTGGGCTTGGCCAGCTGAGACCAA  
95490 95500 95510 95520 95530 95540 95550  
15560 15570 15580 15590 15600 15610 15620  
ACGGCCGCTCAATTCACCCGCTCGGCCAATCTGTAGCCCGCTCCAGGTTGTTCAATTCATCGATGAGCA  
ACGGCCGCTCAATTCACCCGCTCGGCCAATCTGTAGCCCGCTCCAGGTTGTTCAATTCATCGATGAGCA  
ACGGCCGCTCAATTCACCCGCTCGGCCAATCTGTAGCCCGCTCCAGGTTGTTCAATTCATCGATGAGCA  
95560 95570 95580 95590 95600 95610 95620  
15630 15640 15650 15660 15670 15680 15690  
CCTGAATGGCCGATGTGTTCCATCGAATCTTCTGAAGATGGCAAGGCTTCTTCGATCAACTGATTTACT  
CCTGAATGGCCGATGTGTTCCATCGAATCTTCTGAAGATGGCAAGGCTTCTTCGATCAACTGATTTACT  
CCTGAATGGCCGATGTGTTCCATCGAATCTTCTGAAGATGGCAAGGCTTCTTCGATCAACTGATTTACT  
CCTGAATGGCCGATGTGTTCCATCGAATCTTCTGAAGATGGCAAGGCTTCTTCGATCAACTGATTTACT

95630 95640 95650 95660 95670 95680 95690  
15700 15710 15720 15730 15740 15750 15760  
GATCGCAATGTTCCGGATGTCGGTGCATCGTAGTCTCCAGCCGGTAAATGATGCTGACTCGGGTG  
GATCGCAATGTTCCGGAT TCCG GCATCGTAGTCTCCAGCC GTT ATGATGTCAT ACTCGGGTG  
GATCGCAATGTTCCGGATATCCGGAGCATCGTAGTCTCCAGCCGTGATGATGATGCTCAATTCGAGTG  
95700 95710 95720 95730 95740 95750 95760  
15770 15780 15790 15800 15810 15820 15830  
CGATCGACTTGTAGTGGCTGTGAGAATGAGCAAGTTTTCAGATTGGGATGGTTCGTAAGACGGACGAT  
CGATCGACTTGTAGTGGCTGT AGAAT AGCAAGT TGCAGATTGGGATGGTTCGTAAGACGGACGAT  
CGATCGACTTGTAGTGGCTGTAGAATAAGCAAGTTTTCAGATTGGGATGGTTCGTAAGACGGACGAT  
95770 95780 95790 95800 95810 95820 95830  
15840 15850 15860 15870 15880 15890 15900  
CCAGAATAATCTTCGAGAAGTTCGATCAGCTATTGGGCAATCGGGGTCAAGATGCTTTGACCCCT  
CCAGAATAATCTTCCTC AGAAGTTCGAT AGCTCAATGGGCAATCGGGGTCAAGATGCTTTGACCCCT  
CCAGAATAATCTTCCTTAGAAGTTCGATGAGCTCAATGGGCAATCGGGGTCAAGATGCTTTGACCCCT  
95840 95850 95860 95870 95880 95890 95900  
15910 15920 15930 15940 15950 15960 15970  
TACAGAGATGTCATCGGATCCTGGGTCTCGGCAAAAGCCGCTGTACCACTGATGATCAACTGGCC  
TACAGAGATGTCATCGGATCCTGGGTCTCGGCAAAAGC GTCTG ACCACTGATGATCAACTGGCC  
TACAGAGATGTCATCGGATCCTGGGTCTCGGCAAAAGCCGCTGTACCACTGATGATCAACTGGCC  
95910 95920 95930 95940 95950 95960 95970  
15980 15990 16000 16010 16020 16030 16040  
TTGATGGATTGCTCTCCGAAAGGACTTCGGCCAGAGTTCCGGCTCGCGGGCAACCAAGTAGCGTG  
TTGTA GGATGCTCTCCGAAAGGACTC GCCACAGATTCCGGCTCGCG GACCAACCAAA TAGGCTG  
TTGATGGATTGCTCTCCGAAAGGACTCAGCCAGAGTTCCGGCTCGCGGGCAACCAAGTAGCGTG  
95980 95990 16000 16010 16020 16030 16040  
16050 16060 16070 16080 16090 16100 16110  
CTTCGCTTTGAACAGAGAAATTCGTTACAAACCGGATCAGCTCGCGATCGCAATCCAGCCGCTGTA  
CTTCGCTTTGAACAG GATTCGCTTTCAAAGGACTCGGATCGCAATCCAGCCGCTGTA  
CTTCGCTTTGAACAGGATTCGTTGTTCAAAGGACTCAGCTCGGATCGCAATCCAGCCGCTGTA  
96050 96060 96070 96080 96090 96100 96110  
16120 16130 16140 16150 16160 16170 16180  
GGCACAACAGCCAAATGGGGATCCCGCTTCTCGAGTAGGCCACCCACACAGGCTATCGTAGTACTGA  
GGC ACACAGCCAAATGGGGATCCCGCTTCTCGAGTAGGCCACCCACACAGGCTATCGTAGTACTGA  
GGCAACACAGCCAAATGGGGATCCCGCTTCTCGAGTAGGCCACCCACACAGGCTATCGTAGTACTGA  
96120 96130 96140 96150 96160 96170 96180  
16190 16200 16210 16220 16230 16240 16250  
TTCCTCTTAAGATATCTTCGGGATGTTGTTTCGAGTCAATGTAGATTTGGCCAAAGCGTTGTGGGTTG  
TTCCTCTTAAGATATCTTCGGGATGTTGTTTCGAGTCAATGTAGATTTGGCCAAAGCGTTGTGGGTTG  
TTCCTCTTAAGATATCTTCGGGATGTTGTTTCGAGTCAATGTAGATTTGGCCAAAGCGTTGTGGGTTG  
96190 96200 96210 96220 96230 96240 96250  
16260 16270 16280 16290 16300 16310 16320  
CTGGCTCGACGCGCCCTCGTGAATCGGGACTCCAGCCAGGGAAGGAGAGCTGAGACGGTTTGGCCTT  
CTGGCTC ACAGCCCTCGTGAATCGGGACTCCAGCCAGGGAAGGAG AGCTGAGACGGTTTGGCCTT  
CTGGCTCAGCAGCCCTCGTGAATCGGGACTCCAGCCAGGGAAGGAGAGCTGAGACGGTTTGGCCTT  
96260 96270 96280 96290 96300 96310 96320  
16330 16340 16350 16360 16370 16380 16390  
CTCGACTTCCTCGACAGCTTCGTCGGTTGAGAATTTGCCCTTGACACAGAAATGATTTTTTAAATATA  
CTCGACTTC TCGAC AG TCGTCGGTTGAGAATTTGCCCTTGAC AC AGAATGATTTTTT ATTATA  
CTCGACTTCCTCGACAGCTTCGTCGGTTGAGAATTTGCCCTTGACACAAAGAAATGATTTTTTAAATATA  
96330 96340 96350 96360 96370 96380 96390  
16400 16410 16420 16430 16440 16450 16460  
TCCACTGCAATCAACATCAAGAAGACCACCACTACCACTGGCAAGCGGGATGATTCATTTCTGCA  
TCCACTCAATCAACATCAAGAAGACCACCACTACCACTGGCAAGCGGGATGATTCATTTCTGCA  
TCCACTCAATCAACATCAAGAAGACCACCACTACCACTGGCAAGCGGGATGATTCATTTCTGCA  
96400 96410 96420 96430 96440 96450 96460  
16470 16480 16490 16500 16510 16520 16530  
CATAGATCTCAATGACTTCTCGAGATTGTTACGATACAGTAAAGCACCAGTTCGTCAGCAAAATCAAA  
CATATAATTCGATGACTTCTCGAGATTGTTACGATACAG TAAAGCAG AGTCGTCAC AATAC AA  
CATATAATTCGATGACTTCTCGAGATTGTTACGATACAGTAAAGCACCAGTTCGTCAGCAAAATCAAA  
96470 96480 96490 96500 96510 96520 96530

\*16540 \*16550 \*16560 \*16570 \*16580 \*16590 \*16600  
ACGATCACAAACAATAAATAATGAGTGTAGTCCCGTCCAGCTTGGCCCTCCTTCAAGAAGTCTTCCACCCGGT  
ACGATCACAAACAATAAATAA GGTG CTGATCCGTCAGCTTGGCCCTCCTTCAAGAAGTCTTCCACCCGGT  
ACGATCACAAACAATAAATAAAGTAACTGATCCCGTCCAGCTTGGCCCTCCTTCAAGAAGTCTTCCACCCGGT  
\*16540 \*16550 \*16560 \*16570 \*16580 \*16590 \*16600

\*16610 \*16620 \*16630 \*16640 \*16650 \*16660 \*16670  
TCGGGATGTAGCAGTGTGATTCACGCGCAATTCGCTCCACCTCCCTTAATCTGATAGTCTTGTGATCCGC  
TCGGGATGTAGCAGT GTTC GCGCAAAAT CGCTCCACCTCCCTTAATCTGATAGTCTTGA CA GCG  
TCGGGATGTAGCAGTGTGATTCGCGCGCAATTCGCTCCACCTCCCTTAATCTGATAGTCTTGTGAGCCGC  
\*16610 \*16620 \*16630 \*16640 \*16650 \*16660 \*16670

\*16680 \*16690 \*16700 \*16710 \*16720 \*16730 \*16740  
CCTGAATGTATTGAAAGTGCATTCGGGATCCTGTGAGAAGTTGACAACTGCTCGAGGAAGTGAAGACAG  
CCTGAATGTATTGAAAGTGCATTC GATCCTGTGAGAAGTTGACAACTGCTCGAGGAAGTGAAGACAG  
CCTGAATGTATTGAAAGTGCATTCGGATCCTGTGAGAAGTTGACAACTGCTCGAGGAAGTGAAGACAG  
\*16680 \*16690 \*16700 \*16710 \*16720 \*16730 \*16740

\*16750 \*16760 \*16770 \*16780 \*16790 \*16800 \*16810  
TCGGTGTAGCTCTTGAACCTTCGAAACAGATCAATCAGTGCCTTGTGGTCACTGTTCTGTGATCACTTG  
TCGGTGTAGCTCTTGAACCTTCGAAACAG TCAATCAGTGCCTTGTGGTCACTGTTCTGTGATCACTTG  
TCGGTGTAGCTCTTGAACCTTCGAAACAGGTCAATCAGTGCCTTGTGGTCACTGTTCTGTGATCACTTG  
\*16750 \*16760 \*16770 \*16780 \*16790 \*16800 \*16810

\*16820 \*16830 \*16840 \*16850 \*16860 \*16870 \*16880  
GTGGCAATTCGACACAGATTCGCAAGTTCGGCGCAAAATTCGCGCTAAGCATTGCCTTCAGCAATTCCTCA  
GTGGCAATTCGACACAGATTCGCAAGTTCG CCGAAATTCGCGCTAAGCATTGCCTTCAGCAATTCCTCA  
GTGGCAATTCGACACAGATTCGCAAGTTCGCGCAAAATTCGCGCTAAGCATTGCCTTCAGCAATTCCTCA  
\*16820 \*16830 \*16840 \*16850 \*16860 \*16870 \*16880

\*16890 \*16900 \*16910 \*16920 \*16930 \*16940 \*16950  
CGGATCCTCCACCGACAGCGTGCAGAAAGAACTGACCAGCCATTCGGCATTCAGCATGTGCGGTGTGCGAC  
G GAGTCTCCACCGACAG GTCGC AAGAACTGACCAGCCATTCGCG TTAGCAT TGCGTGTGCGAC  
GTGATCCTCCACCGACAGCGTGCAGAAAGAACTGACCAGCCATTCGGCATTCAGCATGTGCGGTGTGCGAC  
\*16890 \*16900 \*16910 \*16920 \*16930 \*16940 \*16950

\*16960 \*16970 \*16980 \*16990 \*17000 \*17010 \*17020  
AACCGCCGCTTAATGTATACAGATCCGCTGATGTGCTCGAGGGCGCGCTGGAGCAGTCCAGCCTTCTCG  
ACGCGCCGCTTAATGTATACAGATCCGCTGATGTGCTCGAGGGCGCGCTGGAGCAGTCC GCTTCTCTCG  
ACGCGCCGCTTAATGTATACAGATCCGCTGATGTGCTCGAGGGCGCGCTGGAGCAGTCCGCTTCTCTCG  
\*16960 \*16970 \*16980 \*16990 \*17000 \*17010 \*17020

\*17030 \*17040 \*17050 \*17060 \*17070 \*17080 \*17090  
CACAGCTGGCAATGTGGGCGCATCTGTAGTGGGTGAACATAGCATTCGCCAGGATGCGCTCGCGCACTT  
CACAGCTGGCAATGTG GCGCGATCTGTAGTGGGTGAACATAGC TTGCCAGGATGCGCTCGCGCACTT  
CACAGCTGGCAATGTGTTGCCGATCTGTAGTGGGTGAACATAGCCTTGGCCAGGATGCGCTCGCGCACTT  
\*17030 \*17040 \*17050 \*17060 \*17070 \*17080 \*17090

\*17100 \*17110 \*17120 \*17130 \*17140 \*17150 \*17160  
CGGAGCAGACATCAGATTCAATTCAGCAGCGCGCTTGGAGGGCACCTCGCGGGACGGTATTGCTT  
CGGAGCAGACATCAGATTCAATTCAGCAGCGCGCTTGGAGGGCACCTCGCGGGACGGTATTGCTT  
CGGAGCAGACATCAGATTCAATTCAGCAGCGCGCTTGGAGGGCACCTCGCGGGACGGTATTGCTT  
\*17100 \*17110 \*17120 \*17130 \*17140 \*17150 \*17160

\*17170 \*17180 \*17190 \*17200 \*17210 \*17220 \*17230  
GAGGGCGTCCAGCAGGAATGCAGTGCAGTGTGCACCATGGAGTGTCCATGAAGATGTCCACAACTGGA  
GAGGGCGTCCAGCAGGAATGCAGTGCAGTGTGCACCATGGAGTGTCCATGAAGATGTCCACAACTGGA  
GAGGGCGTCCAGCAGGAATGCAGTGCAGTGTGCACCATGGAGTGTCCATGAAGATGTCCACAACTGGA  
\*17170 \*17180 \*17190 \*17200 \*17210 \*17220 \*17230

\*17240 \*17250 \*17260 \*17270 \*17280 \*17290 \*17300  
TTGATGTCCGCGCAGTCTTCCCTCGCCACCAACTGAGAGGGCGCAACAGCTTCCCTCCGGGTTGC  
TTGATGTCCGCGCAG GCTCTTCCCTCGCCACCAACT GAGGGCAACCAAGCTTCCCTCCGGGTTGC  
TTGATGTCCGCGCAGGGCTCTTCCCTCGCCACCAACTGGAGGGCAACCAAGCTTCCCTCCGGGTTGC  
\*17240 \*17250 \*17260 \*17270 \*17280 \*17290 \*17300

\*17310 \*17320 \*17330 \*17340 \*17350 \*17360 \*17370  
TTCGCATCAGGAGCCGACGAGGAACACGTAATCGGGCGTATAGTGAACCTTCTGGCGTAGAGAACAAAT  
TTCGCATCAGGAGCCGACGAGGAACACGTAATCGGGCGTATAGTGAACCTTCTGGCGTAGAGAACAAAT  
TTCGCATCAGGAGCCGACGAGGAACACGTAATCGGGCGTATAGTGAACCTTCTGGCGTAGAGAACAAAT  
\*17310 \*17320 \*17330 \*17340 \*17350 \*17360 \*17370

\*17380 \*17390 \*17400 \*17410 \*17420 \*17430 \*17440  
CTTCTGGAATGCCAGCTCAGCAAAAGCATTTGGATAACCTTGTGGGACATTTGGCGGAGATAGATG  
CTTCTGGAATGCCAGCTCAGCAAAAGCATTTGGATAACCTTGTGGG AC TTGG CG AGATAGATG  
CTTCTGGAATGTCCGGTCTCAGCAAAACATTTGGATAACCTTGTGGGACATTTGCAGTGTAGATAGATG  
\*17380 \*17390 \*17400 \*17410 \*17420 \*17430 \*17440

\*17450 \*17460 \*17470 \*17480 \*17490 \*17500 \*17510  
GACAGGGCAAGTGTAGATCGGAGGCTTACACAGATCACCACCTCCCTCGCTGATCCCACTTCFRCCT  
GA AGGGCAAG GTAAGATCGGAGGCTT ACAGATC CCAACTTCCTCGCTCA TCCA CTFCFCT  
GACAGGGCAAGGTAAGATCGGAGGCTTACACAGATCACCACCTCCCTCGCTGATCCCACTTCFRCCT  
\*17450 \*17460 \*17470 \*17480 \*17490 \*17500 \*17510

\*17520 \*17530 \*17540 \*17550 \*17560 \*17570 \*17580  
CCTTCAGCCACTTTCGACAGCTGCTTCTTGGCTGACGCAAGCGGAGCGCACAGCTCGAGAGACT  
CCTTCAGCCACTTTCGACAGCTGCTTCTTGGCTGACGCAAGCGGAGCGCACAGCTCGAGAGACT  
CCTTCAGCCACTTTCGACAGCTGCTTCTTGGCTGACGCAAGCGGAGCGCACAGCTCGAGAGACT  
\*17520 \*17530 \*17540 \*17550 \*17560 \*17570 \*17580

\*17590 \*17600 \*17610 \*17620 \*17630 \*17640 \*17650  
GAACCTTGTGAGTTCGCTTGGCTGGTGGAGGAGATGCCAAAGTATTCGACAGCGCGGAGTCTGGAGCCA  
GAACTTGTGAGTTCGCTTGGCTGGTGGAGGAGATGCCAAAGTATTCGACAGCGCGGAGTCTGGAGCCA  
GAACTTGTGAGTTCGCTTGGCTGGTGGAGGAGATGCCAAAGTATTCGACAGCGCGGAGTCTGGAGCCA  
\*17590 \*17600 \*17610 \*17620 \*17630 \*17640 \*17650

\*17660 \*17670 \*17680 \*17690 \*17700 \*17710 \*17720  
GCTGGCTTCGACACTTGTGAAACCTGGATCCTCTGTGGCTGACCGAGATGGCTTGGGTGCCAGGG  
GCTGGCTTCGACACTTGTGAAACCTGGATCCTCTGTGGCTGACCGAGATGGCTTGGGTGCCAGGG  
GCTGGCTTCGACACTTGTGAAACCTGGATCCTCTGTGGCTGACCGAGATGGCTTGGGTGCCAGGG  
\*17660 \*17670 \*17680 \*17690 \*17700 \*17710 \*17720

\*17730 \*17740 \*17750 \*17760 \*17770 \*17780 \*17790  
CAGCAACTTTAGCCGCTTACGACATAGCGCGCTGTAAGAGCTTGTGAACTTTCGCAAAAGAGATC  
C GAACTTTAGCCGCT C GACATACTGGCCGCTGTAAGAGCTTGTGAACTTTCGCAAAAGAGATC  
CGCAACTTTAGCCGCTTACGACATAGCGCGCTGTAAGAGCTTGTGAACTTTCGCAAAAGAGATC  
\*17730 \*17740 \*17750 \*17760 \*17770 \*17780 \*17790

\*17800 \*17810 \*17820 \*17830 \*17840 \*17850 \*17860  
TTCGGCAGCCAAATTTGCGCAGCGGCTGCGAAGGGCCAAATCGGATTTCCGAGAACGGTGTG  
TTGCG CC GCGAAATTTGCGCAG CCGATCGAAGGGCCAAATCGGATTTCCGAGAAC GTGTTG  
TTCGGCAGCCAAATTTGCGCAGCGGCTGCGAAGGGCCAAATCGGATTTCCGAGAACGGTGTG  
\*17800 \*17810 \*17820 \*17830 \*17840 \*17850 \*17860

\*17870 \*17880 \*17890 \*17900 \*17910 \*17920 \*17930  
ATGTGGGAATGATCTGCTCTGCTGCGGCTCACGGAGAGACCTTCCCTTGGATTTGACGCCAATGA  
ATGTGGGAATGATCTGCTCTGCTGCGGCTCACGGAGAGACCTTCCCTTGGATTTGACGCCAATGA  
ATGTGGGAATGATCTGCTCTGCTGCGGCTCACGGAGAGACCTTCCCTTGGATTTGACGCCAATGA  
\*17870 \*17880 \*17890 \*17900 \*17910 \*17920 \*17930

\*17940 \*17950 \*17960 \*17970 \*17980 \*17990 \*18000  
TGCCACCACTTGCCCTCATGCGGTGCGGTAAACAAGATCGTATCGGCCGATATACGATTATGATATGCA  
TGCCACCACTTGCCCTCATGCGGTGCGGTAAACAAGATCGTATCGGCCGATATACGATTATGATATGCA  
TGCCACCACTTGCCCTCATGCGGTGCGGTAAACAAGATCGTATCGGCCGATATACGATTATGATATGCA  
\*17940 \*17950 \*17960 \*17970 \*17980 \*17990 \*18000

\*18010 \*18020 \*18030 \*18040 \*18050 \*18060 \*18070  
CGTGGCGCTTCCATGTCATACAGATGATGATCCATACTGGTATACAGTATGAGTGTGCTGACTCTG  
CGTGGCGCTTCCATGTCATACAGATGATGATCCATACTGGTATACAGTATGAGTGTGCTGACTCTG  
CGTGGCGCTTCCATGTCATACAGATGATGATCCATACTGGTATACAGTATGAGTGTGCTGACTCTG  
\*18010 \*18020 \*18030 \*18040 \*18050 \*18060 \*18070

\*18080 \*18090 \*18100 \*18110 \*18120 \*18130 \*18140  
GCAGAGCTTGCATAGCCACAGGAAATCATTTGTGCTTCCGCGGAAAGAGACATTCGACGCTTCT  
GCAGAGCTTGCAT GCGC GCGAATCATTTGTGCTTCCGCGGAAAGAGACATTCGACGCTTCT  
GCAGAGCTTGCATAGCCACAGGAAATCATTTGTGCTTCCGCGGAAAGAGACATTCGACGCTTCT  
\*18080 \*18090 \*18100 \*18110 \*18120 \*18130 \*18140

\*18150 \*18160 \*18170 \*18180 \*18190 \*18200 \*18210  
TGGCAACCGCTGATTGCGCTTCCGCGGAGCACCACCTTCGATAAATGAAAGCTTGGCCCAAGTGGCCCT  
TGGCAACCGCTGATTGCGCTTCCGCGGAGCACCACCTTCGATAAATGAAAGCTTGGCCCAAGTGGCCCT  
TGGCAACCGCTGATTGCGCTTCCGCGGAGCACCACCTTCGATAAATGAAAGCTTGGCCCAAGTGGCCCT  
\*18150 \*18160 \*18170 \*18180 \*18190 \*18200 \*18210

\*18220 \*18230 \*18240 \*18250 \*18260 \*18270 \*18280

ACGAACTGCAAAAGCAGAACAGCGTGGTGGCTCCTTGTGGCATCGATTTTAAACGTGGCAAAACTGGCC  
CG AC CAAAGCAGAACAG GTGGT GGCTC TTGTTGGCATCGATTTT AACGTGGCAA CTGGCC  
CGCCACAAGCAGAACAGAGTGGTGGCTCCTTGTGGCATCGATTTTGAACGTGGCAAAGCTGGCC  
98220 98230 98240 98250 98260 98270 98280

98290 98300 98310 98320 98330 98340 98350  
CGATGCTCCTGATTCCTGGGACACTTACGCTCCGAAATTCCTGCATGGCCCGGCAACGAGCAG  
GC TGCCCTCGAT GCCTG GA ACCTT CGTCCACCGAATACAACACTGACCCCGCAACGCGAC  
CGGTGCCCTCGATGGCCTGAGAGACCTTGGCTCCACCGAATACAACACTGACCCCGCAACGCGAC  
98290 98300 98310 98320 98330 98340 98350

98360 98370 98380 98390 98400 98410 98420  
TTGGCAGTGGCCGAAATGCCGACCAAGAGTACGACCTGCGGGAGGCATTGCAGCGGTAGTTGATGATTTG  
T GCAG GCCGAAATGCCGACCA GAG AGCCACTGCTGGGAGGCATTGCAGCGGTAGTTGATGATTTG  
TGGCAGAGCCGAAATGCCGACCAAGAGGACCACTGCGGGAGGCATTGCAGCGGTAGTTGATGATTTG  
98360 98370 98380 98390 98400 98410 98420

98430 98440 98450 98460 98470 98480 98490  
ACACCGTTTACGCGATGAATGCCGGTCAAACATCTTTTGGCGCATCGAATCGCCCTCCATGGACCAATGG  
ACA CGTTCAGCGATGAATGCCGGTCAAACATCTT TCGCGCATCGAATCGCC TCCATGGACCAATGG  
ACACCGTTTACGCGATGAATGCCGGTCAAACATCTTCTCGCGCATCGAATCGCCCTCCATGGACCAATGG  
98430 98440 98450 98460 98470 98480 98490

98500 98510 98520 98530 98540 98550 98560  
AACACACTCGTTTCTGTGACCAAGAGCTAGCGTATTGAGGGAGATCCACTTCCCAAGACACCAATCTCTCGT  
AACACACTCGTTTCTGTGACCAAGAGCTAGCGT TTGAGAGATCCACTTCCCAAGACCAATCTCTCTCGT  
AACACACTCGTTTCTGTGACCAAGAGCTAGCGTATTGAGGGAGATCCACTTCCCAAGACCAATCTCTCTCGT  
98500 98510 98520 98530 98540 98550 98560

98570 98580 98590 98600 98610 98620 98630  
TCATGGTATGCCCTTCATCTTGCACCTCATCTCAATGTTGAAGATTCGCAACGCTCTTTGGCGTAAAG  
TCATGGTATG GCCTTCAT TTGCACCTCATCTCAATGTTGAAGATTCGCAACGCTCTTTGGCGTAAAG  
TCATGGTATGAGCCTTCATTTGCACCTCATCTCAATGTTGAAGATTCGCAACGCTCTTTGGCGTAAAG  
98570 98580 98590 98600 98610 98620 98630

98640 98650 98660 98670 98680 98690 98700  
AAATATTTCAAAGTTTACATGTTCAAATAATGCAATATCCAGCTCGACCGGAA-----AAAAACTTT  
AAA ATTC AAAGTTA ACAT TTC AAAATGCATT TCCAG CGA CG AA AAA C TT  
AAACATTCGAAAGTTACACATATTCGAAATGCAATTCCTCCAGCGCATCGAAATCAAGTCAAATCCAT  
98640 98650 98660 98670 98680 98690 98700

98700 98710 98720 98730 98740 98750 98760 98770  
GATCTCTTCTCCTT--ACTATTTGATATTC--AAAGTTAAAGTTTAAAGTGAAGTTTAAAGTTTCTAGACA  
TCTCT C ACT GA ATTC AACT AGTTTGA GA GTTT AAG TTT TGA  
CTTCTTAAACAGGAAGCTCAAGA--ATTCAGAAATTTGGAGTTTAAACGACGTTTAAAGATTTTAAAG--  
98710 98720 98730 98740 98750 98760 98770

98780 98790 98800 98810 98820 98830 98840  
CGTT-----GTAATAACAGCGACCTGTTTAC-----TAAGCC--TACC-----  
CGTT GTA T ACAAGC GACCTGTTTAC TA CC TAC  
CGTTATCTTAGGACACGATGTCACAAGCAGACCTGTTTACAAGTCCATATATACCCCTTACTTTACTA  
98780 98790 98800 98810 98820 98830 98840

98850 98860 98870 98880 98890 98900 98910  
TTACTTTAAAGTAAATCTGATCCTTTCGACATTCGATCGACTGGACCATCGTTCACGTACCTTT  
TTACTTTAA CTAAATCTGATCC CTTCGG CAT TGATCGACTGGAC TCGG TT A TTACTTT  
TTACTTTAAATCTAAATCTGATCCTTTCGCGCATTTTGTATCGACTGGACCATTCGCGTTGATTTACTCTT  
98850 98860 98870 98880 98890 98900 98910

98880 98890 98900 98910 98920 98930 98940 98950  
GAGCGCAATGACCTTGTAGCTGGATTCATGATAGCCGAATCCGCTGAGATGGGACGCCCGCTGGGATG  
GAG GCAATGACCTTGTAGCTGGATTCATGATAGCCGAATCCGCTGAGATGGGACGCCCGCTGGGATG  
GAGCGCAATGACCTTGTAGCTGGATTCATGATAGCCGAATCCGCTGAGATGGGACGCCCGCTGGGATG  
98890 98900 98910 98920 98930 98940 98950

98960 98970 98980 98990 99000 99010  
GTGGCATGTTTATGTCATGTCATGACCACTTGGCGGATCATTCACCTTCTCCCGCACGCAAAATAACT  
GTGGC TCGTTTATGTCATGTCATGACCACTTGGCGGATCATTCACCTTCTCCCGCACGCAAAATAACT  
GTGGCGTCTGTTTATGTCATGTCATGACCACTTGGCGGATCATTCACCTTCTCCCGCACGCAAAATAACT  
98990 99000 99010 99020 99030 99040 99050

99020 99030 99040 99050 99060 99070 99080  
TATCCGATTCATCGTAGCGTGGTAAATGAAATGAAATGGCGTTGATCCCGACATTTTGGAGCTGTCC

TATCCGATTCATCGTAGCGTGGTAAATGAAATGAAATGGCGTTGATCCCGACATTTTGGAGCTGT C  
TATCCGATTCATCGTAGCGTGGTAAATGAAATGAAATGGCGTTGATCCCGACATTTTGGAGCTGTCC  
99060 99070 99080 99090 99100 99110 99120

99090 99100 99110 99120 99130 99140 99150  
GTAGTGGAGATGAAATGTTGTTTAAATGATAAATGAAATCATAGCATACGACCTATTACACAATA  
AGTGGAGATGAAATGTTGTTTAAATGATAAATGAAATCATAGCATACGACCTATTACACAATA  
AAAGTGGAGATGAAATGTTGTTTAAATGATAAATGAAATCATAGCATACGACCTATTACACAATA  
99130 99140 99150 99160 99170 99180 99190

99160 99170 99180 99190 99200 99210  
TAA-TC-----ATTCAATTAATAATTTGAACTGGCCTGGATTGACCCACATTTACTATAAATTCG  
TAA TC ATTCATTAAT GAA TG CCT GATTGACC ACATTTACTATTA A G  
TAAGTCTGATTTTACTTATT-----GAAGTGTCTAGATTGACCTACATTTACTATAAAGAAAGG  
99200 99210 99220 99230 99240 99250

99220 99230 99240 99250  
CAATACCTTGGCTTAAAGTTAGATGTAATTT-----GTATTATAAC  
ATAA TTT CT AGTTTAGAT AAATTT G ATTATAAC  
AAATATTTTACTTAGTTAGATAAATTTATCTAAATTTTATCTAGATAAACCTTGGAAATATAAC  
99260 99270 99280 99290 99300 99310 99320

99260 99270 99280 99290 99300 99310 99320  
TAGTCTATAGAAAATACACTG-----TATACAGACTTG--AATAGA  
TA TTCTAT GAAATATA TG T TA AGACTTG AATAGA  
TATTTCTATTAATAACACTGAGTTCGCAAAATGGAATTAAGGTATATAACTAGAGACTTGAATAGA  
99330 99340 99350 99360 99370 99380 99390

99300 99310 99320 99330 99340 99350 99360  
AGGTATAGCAAGTAGAAACTCGACCTAAGCCCCATTTTCTGTTTACACGTTGAAATAGAGCTGAA  
GGTAT GCA AGTAAACTCGACCTAAG CC AT T TT TGTTTACA GTT A TTAGAG TGGAA  
GGGTATGGCAAGTAGAAACTCGACCTAAGCTCAATTTCTTATGTTTACATGTTCAATTTAGAGCTGAA  
99400 99410 99420 99430 99440 99450 99460

99370 99380 99390 99400 99410 99420 99430  
ACCGTAAATTTTCTAAGAAA--GT--GGGAGCTTATGATTCGGATATAATCGGTAAATCGTGGCAT  
ACCGTAAATTT CA AAGAAA CT GGG AGCT A GAATCGAT TAT G AGTA TCGTGGCAT  
ACCGTAAATTTCCCAAGAAAATGATGGGAGCTCAGCAATCGGATGTAATGGGAGGATTTCTGGGCAT  
99470 99480 99490 99500 99510 99520 99530

99440 99450 99460 99470 99480 99490 99500  
ATTGGGGGTTGACGTATGTTGGATATGTAATGATGGTAGATCCAAAATATTAATATTTACTCACCCTGTA  
ATTGGGTG TTGACGTA GATAT TAATGAT FTAGAT CAAAATATTAATATTTACTCACCCTGTA  
ATTGGGTGATTTGACGTA---GATATTAATGATAGTATTTCAAATATTAATATTTACTCACCCTGTA  
99540 99550 99560 99570 99580 99590 99600

99510 99520 99530 99540 99550 99560 99570  
AATGCTCCTGAAAGCGGATGGGCACTGTTGCGTCACTTTACTACTACAGTGAAGTCTAGTTATTGACA  
AATGCTCCTGAAAGCGGATGGGCACTGTTGCGTCACTTT ACTACTACAGTGAAGTCTAGTTATT ACA  
AATGCTCCTGAAAGCGGATGGGCACTGTTGCGTCACTTTGACTACTACAGTGAAGTCTAGTTATTGACA  
99610 99620 99630 99640 99650 99660 99670

99580 99590 99600 99610 99620 99630 99640  
GACCTTTACACCTAAATGATATTTGGCAAAACAAATCCCAATGAGATGTTTCTGAATGACCACTTG  
GACCTTTACACCTAAAT TATCT TGGCAAAACAAATGCC ATAC ATGTTTCTGAATGACCACTTG  
GACCTTTACACCTAAATATATCTTGGCAAAACAAATGCCATATGTTTCTGAATGACCACTTT  
99680 99690 99700 99710 99720 99730 99740

99650 99660 99670 99680 99690 99700 99710  
GTAACAGTTTGTATTTGATTTGTTTCGAGGATTTATTTGTTTAAATGCGTTCAGTTTATGCGGGTTTC  
TTAACAGTTT TATTTGATTTGTTTCGAGG T TTGTTGTTTAAATG GTTACA T TCGGGTTTC  
GTAACAGTTTATTTGATTTGTTTCGAGGTT---TTGTTGTTTAAATGTTGTTGATTTTTCGGGGTTTC  
99750 99760 99770 99780 99790 99800 99810

99720 99730 99740 99750 99760 99770 99780  
TGGTTTAAAGTTCGGTTTCCATTGGAACGTTT--AGCTGCACGAAAGCAAAAGATTTGGAAAACATGT  
T GTT AAGATTCGGTTTCCATTGGAACGTTT AGCTGCACGAAA ACAAA A TGG A A A C A T G T  
TTGTTCAAGATTCGGTTTCCATTGGAACGTTTTAGCTGCACGAAAACAAATTAACATGAAACATGT  
99820 99830 99840 99850 99860 99870 99880

99790 99800 99810 99820 99830 99840  
ACTTATGAC-----AGCACTGATCGCCGCAAGATGCGAAAATCAAATTTGGCGCTATTTTATTC  
AGT ATG AC AGCACTGATCGCCGCAAGATGAGGAAAA TC AATTTGGCGCTATTTTATTC

AGTAATGAACACTAATGGAGCAGCTGATGCGGCAAGAATGAGGAAAAATCCAAATGTTGGGGCTTATTTTATGG  
9890 9900 9910 9920 9930 9940 9950

9850 9860 9870 9880 9890 9900  
TTGATGAAAGTGACAGCGTCCCGGATGAAAAAATGAAAGATAAAGGCCATATATGTA-----TGTA  
TTGATGAAAGTGACAGCGTCCCGGATGAAAAAATGAAAGATAA GCCTATATGTA TGTA  
TTGATGAAAGTGACAGCGTCCCGGATGAAAAAATGAAAGATAAAGCCTATATGTACATACATTTGTA  
9960 9970 9980 9990 10000 10010 10020

9910 9920 9930 9940 9950 9960 9970  
CATATGGATGTAACGCCCTAAAATAAAACACCGAGTCTCTTATGTATCCCAATCGCTTTTGGCA  
CATATGGATG AACCCTTAAAATAAAACACCGA T TCTTATGTAT CCAAT GCTTTTGGCA  
CATATGGATGTAACGCCCTAAAATAAAACACCGAATATCTTATGTATGCAATGCTTTTGGCA  
10030 10040 10050 10060 10070 10080 10090

9980 9990 10000 10010 10020 10030 10040  
GAAAATATAGAGAAATATTTCCACGATTAATCCCTTGTATCCGATTTTTPA-TCGTTTCTTCC  
AAAATATAGAGAA TATTTCCACGATTAATCCCTTGTATCCGATTTT T TCG TTCTCT C  
CAAAATATAGAGAACTATTTCCACGATTAATCCCTTGTATCCGATTTT TTTCTCGATTTCTTCT  
10100 10110 10120 10130 10140 10150 10160

10050 10060 10070 10080 10090 10100 10110  
GTTTGTGCACTTGGCCCTACGACGGAAAAATACCAGCCTTTATTTTATTTGAGGTGAGCGAGGAGAG  
GTTTGTGCACTTGGCCGT GACGGAAAAATACCAGCCTTTATTTTATTTGAGGTGAGCGAGGAGAG  
GTTTGTGCACTTGGCCGTGACGGAAAAATACCAGCCTTTATTTTATTTGAGGTGAGCGAGGAGAG  
10170 10180 10190 10200 10210 10220 10230

10120 10130 10140 10150 10160 10170  
AGAGAGAGAGT-----GAGAGCGAATCAAGA----GAGAGAAATTTGAAAGAAAAGAGGCGAG  
AGAGAGAGAG GAGAGCGAAT AGA GAGAGA TTTGAAAGAAAAGAGGCGAG  
AGAGAGAGAGCATTGGAGAGAGCGAGAGCGAATGAGACTCGCGAGAGAGTTGAAAGAAAAGAGGCGAG  
10240 10250 10260 10270 10280 10290 10300

10180 10190 10200 10210 10220 10230 10240  
CATTTATCATCAAAATCGCTGCTACACAGAAAATGAGTCAAGTCTGAGTCCGCTTTGAAACAAATG  
CATTTATCATCAAAATCGCTGCTACACAGAAAATGAGTCAAGTCTGAGTCCGCTTTGAAACAAATG  
CATTTATCATCAAAATCGCTGCTACACAGAAAATGAGTCAAGTCTGAGTCCGCTTTGAAACAAATG  
10310 10320 10330 10340 10350 10360 10370

10250 10260 10270 10280 10290 10300  
TCACTGACTAATACATGACAGCAATTTGCTCTTGTGTTT-----CCCTCCCC-----TGTGTGTCATGA  
TCACTGACTAATACATGACAGC ATTTTGTCT TGTGTTT CCCTCCCC TGT TGTGTCATGA  
TCACTGACTAATACATGACAGCGAATTTGCTTTTGTGTTTCCCTCCCCATGATGTGATGTCATGA  
10380 10390 10400 10410 10420 10430 10440

10310 10320 10330 10340 10350 10360 10370  
AAATCGAAATCGCAATTAATACACTGTTTGGCCCTGATAACAATGGGCAATGCCAATGAAATTCAG  
AAATCGAAATCGCAATTAATACACTGTTTGGCCCTGATAACAATGGGCAATGCCAATGAAATTCAG  
AAATCGAAATCGCAATTAATACACTGTTTGGCCCTGATAACAATGGGCAATGCCAATGAAATTCAG  
10450 10460 10470 10480 10490 10500 10510

10380 10390 10400 10410 10420 10430 10440  
GAAATCGGTATATACATCAAAATGAGTGGCGTAAATCCCAATTCACACGACACAGCAGCAGTCCGC  
GAAATCGGTATATACATCAAAATGAGTGGCGTAAATCCCAATTCACACGACACAGCAGCAGTCCGC  
GAAATCGGTATATACATCAAAATGAGTGGCGTAAATCCCAATTCACACACACCA-----CACACAC  
10520 10530 10540 10550 10560 10570

10450 10460 10470 10480 10490 10500 10510  
GCACACACACTCACAGATGAGCGGACACTTTGCAGTGGCCCAATGGCCACATAAACAAGAACAATAAT  
CACACACAC CAC ATGAGCGGACACTTTGCAGTGGCCCAATGGCCACATAAACAAGAACAATAAT  
ACACACACATGCAC--ATGAGCGGACACTTTGCAGTGGCCCAATGGCCACATAAACAAGAACAATAAT  
91580 91590 91600 91610 91620 91630 91640

10520 10530 10540 10550 10560 10570 10580  
AGATAAAGCGTAAATTAATCGGATGCTTTTACATCAAAATAAACAATTTGATGTATATATGCAATTTG  
AGATAAAGCGTAAATTA TCGGATGCTTTTACATCAAAATAAACA ATTTGATGTATATATGCAATTTG  
AGATAAAGCGTAAATTAATCGGATGCTTTTACATCAAAATAAACAAGATTTGATGTATATATGCAATTTG  
10650 10660 10670 10680 10690 10700 10710

10590 10600 10610 10620 10630 10640 10650  
CAAGCGACACACACAGCAGCTTTAGCACTTTACATTTTTTCCCAATGAAATCGAAGATATTTGGAGCCC  
CAAGCG CACACACAGCAGCTTT GCACTT ACATTTTTTCCCAATGAAAT GAAA A ATTTG GCCC  
CAAGCGCGCACACACAGCAGCTTTAGCACTTTACATTTTTTCCCAATGAAATGAAA-AGATTTGCTGCCC

910720 910730 910740 910750 910760 910770 910780

910660 910670 910680 910690 910700 910710 910720  
GTATGCTTACTGCAATTTAACAAAAATGACGCTAAGTACTATCATATCGAAAT-AATCACGTCGGTGT  
GTATGCTTACTGCAATTTAA AA AT TA GCTA GTA ATCATACTGAAA AA CACGTCG TTT  
GTATGCTTACTGCAATTTAAATGATTTATGCTATGTAATAATCATATCGAAAAAACACGTCGATTT  
910790 910800 910810 910820 910830 910840 910850

910730 910740 910750 910760 910770 910780 910790  
GTTGCTAGATGACGGGCACACACTGAAGACAACTGAGCTCTTATCAAGCTTACAAAATGTAGTTTA  
GTTGCT TGACGGGCACACACTGAAGACAA CTGAGCTCTTATCAAGCTTACAAAATGTAGTTTA  
GTTGCT--TGACGGGCACACACTGAAGACAACTGAGCTCTTATCAAGCTTACAAAATGTAGTTTA  
910860 910870 910880 910890 910900 910910 910920

910800 910810 910820 910830 910840 910850 910860  
TTTTTCTTTTGTGACTAAATGACTGACGACAGCAAGGTAGAGGCTGGAAGTTATACAAATTAATGCC  
TTTT TTTTGTGACTAAATGACTGACGACAGCAAGGTAGAGGCTGGAAGTTATACAAATTAATGCC  
TTTT--TTTTGTGACTAAATGACTGACGACAGCAAGGTAGAGGCTGGAAGTTATACAAATTAATGCC  
910930 910940 910950 910960 910970 910980

910870 910880 910890 910900 910910 910920 910930  
GATATATACGGCAAAATGCAATTCGCTGGAGTGAAGAAAACATCGATACCAATTCGAATTCGAATCGA  
GATATATACGGCAAAATGCAATTCGCTGGAGTGAAGAAAACATCGATACCAATTCGAATTCGAATCGA  
GATATATACGGCAAAATGCAATTCGCTGGAGTGAAGAAAACATCGATACCAATTCGAATTCGAATTCGA  
910990 911000 911010 911020 911030 911040 911050

910940 910950 910960 910970 910980 910990 110000  
TATTTGTATCGCACGCTTACTGTTACAGC-TATTTATCATAATATCGAATGAAATTAATTTAGG  
TATTT TATCGCACGATC ACT TTACAGC TATTT TTC TAAAT AAT TA TT T TT G  
TATTTACTCGCACGATCTACTTTTACAGCTTATTTGTTCTTAAATGTAATATGTAATTTGGGCTGAG  
911060 911070 911080 911090 911100 911110 911120

911010 911020 911030 911040 911050 911060  
TAAATGATGATAACTTTGTAGGAAACACAAATTT-ATTTTATTTTACGCTTCAATTTATTTTGGCC  
T A TGTG TA ACTTTGT A GACACAAATTT AT T T TATC CT TTTA ATTT C  
TACTGTAATAAGACTTTGTAAGAACACAAATACATATCTATATCT--CATCTTTA-ATTTTAC  
911130 911140 911150 911160 911170 911180 911190

911070 911080 911090 911100 911110 911120 911130  
GATAACA-AGTTTTAGATCATAATACATAGCTAAGGTTAACAGGTTTATCGAGTATCCCAATTTGGATA  
GATAA A TT AGATCATAATACATAGCT GG TAACAGGTT TATCGAGTATCCCAATTTGGATA  
GATAAGTAAATATGAGATCATAATACATAGCTGTTGGTTAACAGGTTTATCGAGTATCCCAATTTGGATA  
911200 911210 911220 911230 911240 911250 911260

911140 911150 911160 911170 911180 911190 911200  
TATTTCTTAATTTGGAATCTATTTTTTATAGCAATTTAATTTGGAATGGAATTTATACCGGTTACT  
T T TCT ATTTGA A AGC  
TGTGTTCTTATTTGA-----AAAGC-----  
911270 911280

911210 911220 911230 911240 911250 911260 911270  
CGTAGAGTACAGAACACACCCCGAAAAAATTTAAATTTACAGTTTGCAGCTCACACTATCGGATGA

911280 911290 911300 911310 911320 911330 911340  
CGGATATCGATAGTCGGAGACGGGACTTAAAGCATTCTCTTCCGTTAATTTTTAAAAATATATATACAT  
G TAT GAT TTTTAA AA  
-GTTATTCGAT-----TTTTAGAAC-----  
911290 911300

911350 911360 911370 911380 911390 911400 911410  
TAATATCTTGTCTAAGTCTGGATAAATGAGGCGATAATTTTAAACATTTGCTTACATCACTACTTAT

911420 911430 911440 911450 911460 911470 911480  
TTTAAAGTAGCGGATGATTTTAACTTTGTTCTTTTCAATACTATTTTGTACATTTACACTCAATGCTGCA

¶11490 ¶11500 ¶11510 ¶11520 ¶11530 ¶11540 ¶11550  
CAGAACAACAACCTTAGGATTTGCTCCAACATTTTTTTATTGTTTTATCATTTGGAAAACCGAATC

¶11560 ¶11570 ¶11580 ¶11590 ¶11600 ¶11610 ¶11620  
CCAACAATAAACTTTAATCTATGAGGTAAGCAGCAGTATCCGATTTGAAGCACCTTTTGGCGATAGAA

¶11630 ¶11640 ¶11650 ¶11660 ¶11670 ¶11680 ¶11690  
TCTATACCGCTCTTGACTTGACTGATCAAGGCATGACAAGGATGGGGCAAGGAGCTAGACGAATATTGC

¶11700 ¶11710 ¶11720 ¶11730 ¶11740 ¶11750 ¶11760  
GGGCGTCCCGCTCGCAGATTTGCGGTAGTCTTCGAACGGGCGAAGGCTCCAGCACCTCAGCAAGTTGTCG

¶11770 ¶11780 ¶11790 ¶11800 ¶11810 ¶11820 ¶11830  
AAAGGTACACATAATCAATTTTTGTCTCGAGGCACAAAATTTGGAATCTTTTTATFAAAGCAAAAAG

¶11840 ¶11850 ¶11860 ¶11870 ¶11880 ¶11890 ¶11900  
CGATGTCACCTCTTACCATGAGCAATCCCTTGAGGACTCTGAAAGTTTTTCATTATTGCAAGTGGFAAAA

¶11910 ¶11920 ¶11930 ¶11940 ¶11950 ¶11960 ¶11970  
AACCCAGCTGGATTGTCGGAATTTGACAGTGCTCGATGCTTTGGCCGTTTCGAGCTGCGCGAATCTCCTG

¶11980 ¶11990 ¶12000 ¶12010 ¶12020 ¶12030 ¶12040  
CTAGCGCTCCACCCGCCAGGATTCCTCAACCCAGGGCCATTTGGGAGAGGATCCGTCGCTAACAGAATA

¶12050 ¶12060 ¶12070 ¶12080 ¶12090 ¶12100 ¶12110  
AGGTAAACTGATAAATCTCTCGTTTTCCAGGGAATCTTTTTATTAAATAAAGTTCTTCTACAGTATAT

¶12120 ¶12130 ¶12140 ¶12150 ¶12160 ¶12170 ¶12180  
ACAGACGTTCTTACGACTCGGTTTTGGGATCTAGGAAGCCAGGATAAATGGCAGAATGCTGCGGACTCT

¶12190 ¶12200 ¶12210 ¶12220 ¶12230 ¶12240 ¶12250  
GAGCTTTGTCAATCATATTCAATTTGATAACATAAAGATACCACTAAATCTGTTTTTATTTTTCTTCGCT  
AATTCGTTTT A T CT T  
-----AATTCGTTTTGGA---TACTGAAT  
          ¶11310   ¶11320

¶12260 ¶12270 ¶12280 ¶12290 ¶12300 ¶12310 ¶12320  
TTTCATGTTTACCTAGATTATTTAATATATATTTACAT-TGAAACGTTGTTGTCATTCAAATAAATATAC  
TT AT TTT TTA TTTA AT T ACA TGA TT TT T ATTCAAA AA A AC  
TGTGATTTTT-----TTAATTTA--ATGCGATGACAGGTGA-----TTTTTATAATTCAAA-AACACAC  
¶11330           ¶11340   ¶11350   ¶11360           ¶11370   ¶11380

¶12330 ¶12340 ¶12350 ¶12360 ¶12370 ¶12380 ¶12390  
C-CCTTCTGTGGGACCAATAATAATGCAAGTTCCAATTTTTATACCCGTTACTCGTAAGGGTAAGAT  
CTT TC T A T ATA AG T A TTTT TACC  
TACTTTTCACTTAAATTTGCTGATAT---AGATAGACATTTTTTACCT-----  
          ¶11390   ¶11400   ¶11410           ¶11420   ¶11430

¶12400 ¶12410 ¶12420 ¶12430 ¶12440 ¶12450 ¶12460  
TCGTTGAACTGGCAGAGGAAGCGTTCCGACATATAATCTATATATATATATATTTCTGTATCAGG  
GTT A AC CAG G G GTT ATC ATA AT T PA A AT CT  
--GTCATAC---CAGTTG--GTGT-----ATCGATA-ATTTGTA-AGATCCT-----  
                  ¶11440                   ¶11450   ¶11460   ¶11470

¶12470 ¶12480 ¶12490 ¶12500 ¶12510 ¶12520 ¶12530  
AGAAATAGCCGAGTCGATCTGTCATGTCCTGTCGCGTATGAACGTCGAGAATATAAAAGCTAGAAG  
AAT G  
--AATGG-----

¶12540 ¶12550 ¶12560 ¶12570 ¶12580 ¶12590 ¶12600  
GTTGAGAGTCCCAAGTTGAGATCCATGTTGCCACGCCACTCTAACCGATAATACAGCCCGCAAGAT

¶12610 ¶12620 ¶12630 ¶12640 ¶12650 ¶12660 ¶12670  
TATCGCGTGAGGTAACGATGTAATCGAAGGATTACAGCGCCCGACATGGGCGGAACTTTGTTGTCG

¶12680 ¶12690 ¶12700 ¶12710 ¶12720 ¶12730 ¶12740  
CGCGGATGGCAGGGCGACAGGATCACACGATTCGCGGACAGCTGCGGGGATACCTTGGTCGGAATGG

¶12750 ¶12760 ¶12770 ¶12780 ¶12790 ¶12800 ¶12810  
TGGATTGCTTACGATTCCAGGACATTTGGTAGCATCCACAATGGGTTTTTGTCCCAATAAAGTAAC

¶12820 ¶12830 ¶12840 ¶12850 ¶12860 ¶12870 ¶12880  
TGCGGAGGATGCGGTTTTGTGTAACGATCACCGATCAGAGGACATTTATGCAAGCATCATATCGTCCGCA

¶12890 ¶12900 ¶12910 ¶12920 ¶12930 ¶12940 ¶12950  
TATCTGCTACATCCGCTGCATGGCGTGATAAATGATCCCAGCCGATCAGATTCCCACAACGATTAATG

¶12960 ¶12970 ¶12980 ¶12990 ¶13000 ¶13010 ¶13020  
CGCATAAATGAAAATCATCAAAAATTTATAAAGTATTTAAGAAGAAAATTTCTTTAGAATGTCATCT

¶13030 ¶13040 ¶13050 ¶13060 ¶13070 ¶13080 ¶13090  
GATTGAACTCTGGTGTGTATGATGAGCTATAAATAAAATTTAAATATATTTATTTAAAATGCTAAGAAA

¶13100 ¶13110 ¶13120 ¶13130 ¶13140 ¶13150 ¶13160  
CTTTGCTATCTGTGAGTTTCTAAAATTTCTGATCAAGTGGGCAATGAAAATAACATTTTGTGTTTTGTA

¶13170 ¶13180 ¶13190 ¶13200 ¶13210 ¶13220 ¶13230

CTTTCTGATCAGTAAACGACCCAGTTAACATTTGGCCAGCACCATGAAACAGCTCCGAAAAACTTACCA

-----

¶13240 ¶13250 ¶13260 ¶13270 ¶13280 ¶13290 ¶13300  
AAATAAGACCGTTGAAAATATTTTACAAAAGTAAAGGGCAGGAAAAATTAGCCTTTTCTACGTTTATAC

-----

¶13310 ¶13320 ¶13330 ¶13340 ¶13350 ¶13360 ¶13370  
ATATTTGGTAAAATTTCCAACCCCAAGTATTTGTATCCAGGAACAGAGGTAAGTTCAAATTTAAACCA

-----

¶13380 ¶13390 ¶13400 ¶13410 ¶13420 ¶13430 ¶13440  
TTTTGTAGACACCAATCGCGTCTCACACAACCTCAATCACAATCAAATTTTCGGTTCCAAAATAAAAA  
CAAATAAAAA  
-----CAAATAAAAA  
¶11480

-----

¶13450 ¶13460  
AA-----AAAAAAAAAAAAAAAA-----  
AA RRRR AA A R RR  
AATCATATTTTGAGAGCGAAAATATATATAAATTTTATAATATTTTATAATATAAATATTTATA

¶11490 ¶11500 ¶11510 ¶11520 ¶11530 ¶11540 ¶11550

-----

TAATAATAATATTTTATATAATAATAATAATAATAATTTTATAATTTTATAATAATAATAATAATA  
¶11560 ¶11570 ¶11580 ¶11590 ¶11600 ¶11610 ¶11620

-----

TATTTGATGAGGTAACAATAGTGTATAAATTTTAAATTTGTGTTAACTAATAATATATTTTAAATCG  
¶11630 ¶11640 ¶11650 ¶11660 ¶11670 ¶11680 ¶11690

-----

A  
AAATATTTGATAGATATCTTTTGGCGCTGTTAAGCTTTTCGTATAATAAATGAATAAATTTAAATATA  
¶11700 ¶11710 ¶11720 ¶11730 ¶11740 ¶11750 ¶11760

-----

AGACCAATTCAAAAAGCCAAAATAAACTTCCAATCATTTGAAGTTATAAAATGTATATTTTATAAAT  
¶11770 ¶11780 ¶11790 ¶11800 ¶11810 ¶11820 ¶11830

-----

TTTTCATTTTATTGGTATATATGATGTCAGTAGAAAACCTTTTACATTTTGGACACTGGTTAAGGCC  
¶11840 ¶11850 ¶11860 ¶11870 ¶11880 ¶11890 ¶11900

-----

TAGTATAAAAAGCATTTGGCGCAACAGCCGCGAGTTGCCTCGCACAGTAGAATGCGACTATGATTAC  
¶11910 ¶11920 ¶11930 ¶11940 ¶11950 ¶11960 ¶11970

-----

CGGATAATGTCGCCTTGTGTTCTTTCAATACAATAACAAGATCATAAAATTCGGTGAACACTGTGC  
¶11980 ¶11990 ¶12000 ¶12010 ¶12020 ¶12030 ¶12040

-----

ACACCTCGAAGCAGAATTCGCACAGGAAGTGCAGGAAGAGTTCCCTTTGAGCACTTGATGAGTATGTCG  
¶12050 ¶12060 ¶12070 ¶12080 ¶12090 ¶12100 ¶12110

-----

GAGTTTTCAAAGAGTCTTTGCTAGTTTCCATTCTTTTCGTGGGCAACACAATTTGGTCTTCTTCAGT  
¶12120 ¶12130 ¶12140 ¶12150 ¶12160 ¶12170 ¶12180

-----

ATTTGAGCAGATGGAGAAGTCTTCTCCACAGTTTCGTGCAATGGAGCAAAATACGTGTATAGGTGTA  
¶12190 ¶12200 ¶12210 ¶12220 ¶12230 ¶12240 ¶12250

-----

GCAAGTACTGCAATTTGCCGCGATCTCCAGCATCTTATCGAAGCAAAATATATAGTCGCTGATAGC  
¶12260 ¶12270 ¶12280 ¶12290 ¶12300 ¶12310 ¶12320

-----

GTGTGACATAAATCCGAATCTTAATGATCCGTATGCCAGGCACTTTGGGCGTCCCTCAGTCTTGT  
¶12330 ¶12340 ¶12350 ¶12360 ¶12370 ¶12380 ¶12390

-----

GGTGTGAGGACCTTATCGCGCCACGACTTTCCAATTGCAGCAGTGTGCTTCAATCCCTCGTCCAGCA  
¶12400 ¶12410 ¶12420 ¶12430 ¶12440 ¶12450 ¶12460

-----

AATCGGCCAGCTTAACCGTATCACCCGATCGAGTCTTAACTTCTTGCCATCTCACCGAAGCAGCGCC  
¶12470 ¶12480 ¶12490 ¶12500 ¶12510 ¶12520 ¶12530

-----

A  
AACTCTACGTGCTCAACAGATGAGTGAAGTGGATTGAGGATGATGCTTGGCAGCTTTGAAAAAG  
¶12540 ¶12550 ¶12560 ¶12570 ¶12580 ¶12590 ¶12600

-----

GTGTTGAAAATGCGTGCTTTTGGCGGCATCGACCAGTAGATGATCCAGTCCGAAAGTTCTCTCCAAGC  
¶12610 ¶12620 ¶12630 ¶12640 ¶12650 ¶12660 ¶12670

-----

GATAACGAAATGGCTGCCATATCAGAGGTGTCTAGGTAAGCCGCAATCCGATTTCAACAATTTGTCAAGG  
¶12680 ¶12690 ¶12700 ¶12710 ¶12720 ¶12730 ¶12740

-----

TATGCCAGTTTTCGTATCGTCTGGCCACATGATTTTGGGACCTTCATCTCTTCCAGCAGCCCTTTTCCT  
¶12750 ¶12760 ¶12770 ¶12780 ¶12790 ¶12800 ¶12810

-----

CGCAAGTATTCACAACAGACAGCATACTGATTTGATAGAAGATTCAACAGCTTCTTGTGCTAATAT  
¶12820 ¶12830 ¶12840 ¶12850 ¶12860 ¶12870 ¶12880

-----

CTAATCGTTCGTAGATCGTTTGGAACTCCTTTTCGCGACACATTGCAAAATAACTCCAGCGCTTTATGGA  
12890 12900 12910 12920 12930 12940 12950

GTTCCGGACACCTTTCTGCAATGAACCACTCGACTGTAGGCACGTTTTTGAACCTCATCTTCATCG  
12960 12970 12980 12990 13000 13010 13020

AATTCGACGGGAAGTATTATTACCTCGAGCACATCGTAATTAGTTCGTTTGTAAAAAGTCTTACCGTT  
13030 13040 13050 13060 13070 13080 13090

TCTTGACTCCTTTGTAGAACAATTGCAGATCACTTATTGGGGGGCTTTCATTAAAGTAGTGGGGAAGC  
13100 13110 13120 13130 13140 13150 13160

ATCTTCCAAATGGCAATCAGCATGCCAACTGTGTTCCCAATCACCAGGTGTTGGTGGCGGATCACA  
13170 13180 13190 13200 13210 13220 13230

TGCTGCTGCAGGAATCCAGTAGAGGCATAACGATTCCGCCAATGATGGTGGATCGCAAGTGACCGACAT  
13240 13250 13260 13270 13280 13290 13300

GCATCTGTTTGGCAATGTTGGGCGATGAAAAGTCAACAGGACTCGCCTTTTCTTCACTCTCGGGGGCTC  
13310 13320 13330 13340 13350 13360 13370

GACACCATAGCGCAAAAGATTGCTCAAGCTGAAGCTGCATAATCTCTGCAAAAAAAGATTTTAAAG  
13380 13390 13400 13410 13420 13430 13440

TTTGTAAATGGAATTCATGATCTAGTGTACCCACTTGCTAAGGAAAAGTTACGAAACAGCTCCAGCA  
13450 13460 13470 13480 13490 13500 13510

13470 13480 13490 13500 13510 13520 13530  
ATTTCCAACTT---CCTTG---GGGAAAAGTAAGCTTTG---CCTAGATTATCGGCACACATTTTTTTCGTT  
ATTTCCAACTT C TG GS A GT GC TG C T TCGG C A T T CGT  
ATTTCCAACTTTTCTATGAGTGGCGATGGTGGCAGTGCCTTTCACACTCGGTCCGAA---TATCACGTG  
13520 13530 13540 13550 13560 13570 13580

13540 13550 13560 13570 13580 13590 13600  
TAGCCCATCCATTCATTTTGAAGTTCATCGAAGCGAGTTGTATTTTCCAAAT---CGTGTATTAGTTTCGACA  
GC A AT C TTT TT AAG TTG A TCC AT C TTGT G GA A  
GTGCTTTACTAATGCCCTTTTCTTT---AAGTTTCTTGGACAATCCCATGGCATGTT---GCACATGATA  
13590 13600 13610 13620 13630 13640

13610 13620 13630 13640 13650 13660  
TTTCATACATTTGGTTGATAAAAAATAAATACTACACACACAGTACACTCGTATCGTA---CTC---GTATTT  
T ATTT G GA A AT A A T T CA A ACA G CGTA CTC G ATT  
GTCCCGCAATTTTCGACAGCTACTATTA---ACTGGTGCA---ATTATAACAGG---CGTATCTCTGAAATTC  
13650 13660 13670 13680 13690 13700 13710

13670 13680 13690 13700 13710 13720  
CG---AATTGAAAATTTTCGCCAAAACAGAAAACCTAATAAGAAC-----ATCTAA---ACCATTCTCGTC  
CG A TGA TCGG C A GA A A T A G C A ATC AA A ATTC T  
CGGAAAAGCTGATGCAATCGCTGACCAAGACACTTTCAGGTGCTCGGTGATCGAAGAGGATTCCTT-

13720 13730 13740 13750 13760 13770

13730 13740 13750 13760 13770 13780 13790  
GCAGCTAGCAATCCAAGTGAAGTAAATCATGTTTAAAATGAACGAAACGAGAGTAAATCAGACGCAAGCGAG  
G AGC TC G G G C TT A T G A GA T C GA AA A  
---G---AGCT---TCGGGGCGCCCGGGCGGCAATTTGATTTCCTCAGCAATAGACTCGCGAAAATAAATAA  
13780 13790 13800 13810 13820 13830 13840

13800 13810 13820 13830 13840 13850  
CC-ATTATCAGGG-CTTCAA-AGAGGGCCTTCCAGGAAA---AGATTC---GCAACACAGATG-GAACTCGT  
C A T TC CTT AA A A G T CA AA A TTC G A A A A G G TC T  
CTAAATTTCTTATACTTAAACACATTTGGGGT-CATAAATTACCTTCTTCAGGATAAAAAGCGGTCTT  
13850 13860 13870 13880 13890 13900 13910

13860 13870 13880 13890 13900 13910 13920  
---GTGGCGTGACTCAAAATGGGAAACGATCAACG-CAACAGTCGAA-TG-TGCCGATGGATGGATGGG  
G C T T ART GAA C A GAA C AC GTC AA TG T C ATG G T G  
AAGCTTCTTATTTCAATTTGAAGCTGAACAGATCGAC-GTCCAACGTGCTCACAATGTTGCGGAGTTTG  
13920 13930 13940 13950 13960 13970 13980

13930 13940 13950 13960 13970 13980 13990  
GATATGGGACGCAAAATGTCGGAAGATGGAATGACTGATACATCGAATACCGTCAACAGCCATCCGTT  
AT GG GCAA G TGG C G T C T AA CGG A G CAT T  
TATTTCCGGCGCAA-----GGCCTTGGGTCTTCAGTTCCTTTAAAGCCGGC---AATTGTCATG-----T  
13990 14000 14010 14020 14030

14000 14010 14020 14030 14040 14050 14060  
CCAAGGATCAAAGCAATGTC-GCGAAAACAAAGCCATCCCATCCCTACAACACCAGGACAGATCG  
C AA T A AA T TC GC A A C T CC C A C GAG CA AT  
CAAAATGTTGGAGTAAAGTATCAGCTATTTGCTTACCAGTTC---CTGATTTCTCAGTCCATATTT  
14040 14050 14060 14070 14080 14090 14100

14070 14080 14090 14100 14110 14120 14130  
AACAAGAGACAAAGCACAAGATATGTA AAAAAGTGCAAA-CAGAA-AGACGAATGCCATCATCG  
A C GA A G CCAA AT T T A G TGC C GA AA A AA CA CA GG  
AGCTCGGAC---ATGTTCCAA---AT-TTTGACTTTTGTGCTTCGCTGATTAAATACACAAACA---CAAGC  
14110 14120 14130 14140 14150 14160

14140 14150 14160 14170 14180 14190  
CTCTCCGAT-GATGG--AATGCGCGGCAAAA--GCCGGCCAAAATTAATAGTATA-GCGAACTTAGCT  
T C AT GATGG A T G GCA AAA GCC C A ATAA T A G GA T A  
ATGCCACATGGATGGCAAGTAGTGTGCACAATCGCCTATCGATGACGATAACTGCAAGTGTATGTCACGC  
14170 14180 14190 14200 14210 14220 14230

14200 14210 14220 14230 14240 14250  
ACGGCAG-CGAATCCAGCATGCCG---TTCGAATGAAACAGCAGCAATGACAA--TCAGAAAT-AACA  
A CAG C TC G ATGCCG TTC A TG G T A TCA A T AAC  
ATCACAGTCACTTCTTGGATGCCGTTTTCTACTGCTTATTTGGGTATTTCACTATTTCACAGTCAAGC  
14240 14250 14260 14270 14280 14290 14300

14260 14270 14280 14290 14300 14310 14320  
ATGACATGCTGAGGGTGTAGTGGATTGATCGACAGG---AGAGCGCAACAGGATGTTATCGGTGGCTA  
CAA C A TA T ATTT TC CAG A A C C A A TA GGT G TA  
TGCAGACACA---TA-TTTATTTTTCGAGCTTAAATCATCTTTAAAARAAGTAAAGTCCGTA  
14310 14320 14330 14340 14350 14360 14370

14330 14340 14350 14360 14370 14380  
TC-ATCCGGTGGCCATTTGGCGATGTAAT---CGTAAACCGTATCATGTCCTC-AAAAAGCTGGGCTGG  
T A T AT G G T T TT CG AA C A CAT CT AAA A T GGCTGG  
TAGAAAATATATGATGATGATGATGTTTTTATAGCGCAATACAACA-CATCGCTAAGAAATATGTTGGCTGG  
14380 14390 14400 14410 14420 14430 14440

14390 14400 14410 14420 14430 14440 14450  
GTGCTTCTCC-ACCCTGTGGCTATGATATACCAGATGGAATGCTACTGCTGCTCAAGGTCTCC  
G CA T A CG T G TGC A AC C AT GAT TA G TC A T TC  
GACCCATGGGAAAAGCGCATCGGG-TGC-ACCTAACACTTAT-GATTTTTATCGATGGATCGATTTTC-  
14450 14460 14470 14480 14490 14500

14460 14470 14480 14490 14500 14510 14520  
AAGTCGGCGAGGTCTACAAGGA---AACTGGTATCGA---TGAGATTATGCTCTTTTCCAAATGAGCCT  
G CA CTA A GA AA TG AT G T G T A G T T TC AAA T  
-----GACCACCATATATGATTAATGATGTTGCTTTTCGCTTAAGGTG-TCTCTAAAACCTTTT  
14510 14520 14530 14540 14550 14560 14570

¶14530 ¶14540 ¶14550 ¶14560 ¶14570 ¶14580  
ACACGA---TCAGCATAAGTACAGANGCCACGTGGTCGG-TTCTACAGATTCTTTGAAAT-TACCGGAC  
A G T G TAA TA A A T GTC TTCT AT C TTGA T TA GG  
ATGTGTATGTGTGTTAATTAATTTATAGATTTTGTCACTTTCTGTAAATAC-TTGATGTCTAGTGG-  
¶14580 ¶14590 ¶14600 ¶14610 ¶14620 ¶14630 ¶14640

¶14590 ¶14600 ¶14610 ¶14620 ¶14630 ¶14640  
CGCACGGAAGGCACA---TTGGCTGGT---CCTAGAGTTCCTCGTGACA---ATTTGCTAAAAGTCATC  
G CG AA A A TTTG C GT C A A TC C G A A AT TG AAA T  
-GGGCGCAACTAAAGTGTGACGTGTGGCCGATATATCCCCGCAAGATACATATGTAAAACATGAGA  
¶14650 ¶14660 ¶14670 ¶14680 ¶14690 ¶14700

¶14650 ¶14660 ¶14670 ¶14680 ¶14690 ¶14700 ¶14710  
GAAAGATGCTTTTACAAGGATGCCCCATTTCCAATATCAAGCAAATGCCAGCAGGTGCTCACGGGGC  
AAA A T T AA G CCGATT AA AT A AAA TGC GCAG ACGG  
AAACAGATGTCTTAACCGCCCTCCCATTT---AAATTA---AACTGCAATGCG---ACGGTTT  
¶14710 ¶14720 ¶14730 ¶14740 ¶14750 ¶14760

¶14720 ¶14730 ¶14740 ¶14750 ¶14760 ¶14770 ¶14780  
TAAATTTCTGCAAGAGAGTGGGATCATAACACCCGATCAAAGCCGAGAAATGCTCCTCGCTC  
T GTTT A A A T GG ATA A AC AT TA CCGG G  
TTTTGTTTTACAAATATAAATAGTGG---ATAAAAACATATTTA---CCGGGG  
¶14770 ¶14780 ¶14790 ¶14800 ¶14810

¶14790 ¶14800 ¶14810 ¶14820 ¶14830 ¶14840 ¶14850  
CAACGAGGTGTCGCTTCGGACCGAGATCAAGACCGCAATGAAGTATATTTGAAGGCCAACGAGGGGAAA  
GAAA  
-----TTGATGGACA-----GAAA  
¶14820

¶14860 ¶14870 ¶14880 ¶14890 ¶14900 ¶14910 ¶14920  
CTAAGTCCCTAGGTATGTTAGATATACTCGTATAATAGCACACATCTGAACAGTATAAACGTTATAGTCT  
CT TCCTA TAT AA AG A A T AAC GT T C TT A CT  
CT---TCCTATTTAT-----AACAGGAGA---TAACTAGTT---CCTTCGACT-  
¶14830 ¶14840 ¶14850 ¶14860 ¶14870

¶14930 ¶14940 ¶14950 ¶14960 ¶14970 ¶14980 ¶14990  
CAAGATGACCAAAACGGCCAAGAGACGGATGCAGGCAAAAGTCCAAGAGGTGATATCGTTTTTCAAGAA  
G CC AAA GCCAAG G C GATG GAA TG A GTT  
---GTGTCCCAAAATGCCAAGTGTG-GATGGG-----GAATTTGTAAGTTAC-----  
¶14880 ¶14890 ¶14900 ¶14910

¶15000 ¶15010 ¶15020 ¶15030 ¶15040 ¶15050 ¶15060  
CATCGCCGATGCTCCGACGGCAGGGCATCGAGGATCTGCTCTATCTGGCCGAACTGGCCCTCATCGAAC  
-----

¶15070 ¶15080 ¶15090 ¶15100 ¶15110 ¶15120 ¶15130  
CGATTACCAGCCGATGCGCGTCTCCGATAACTTACCATTCCTCCCTCGGCTTCGACGGGTTATGAT  
-----

¶15140 ¶15150 ¶15160 ¶15170 ¶15180 ¶15190 ¶15200  
GATGACGATGCCGATTGCCGTACGGTCAAGATTCGAATTCGCCGAAATGGAGGCAATGGAATACAAA  
-----

¶15210 ¶15220 ¶15230 ¶15240 ¶15250 ¶15260 ¶15270  
TSCGACAGGATAAACCTGTGTTTAAAGAGTCCAGAGCTCTTCTTGGGATATGTGCTCGCATATTTACAGA  
-----

¶15280 ¶15290 ¶15300 ¶15310 ¶15320 ¶15330 ¶15340  
ATTTGGATGAGAAGGAGCTTAGCACTCAGGACAAGCGAGGCGCTTCAACGAGGCGAGTGGACTGGCCCA  
-----

¶15350 ¶15360 ¶15370 ¶15380 ¶15390 ¶15400 ¶15410  
GACCAAAAAGAATGCCAGGTCCCGATTGAGATTGGCATCGAATGCTGCATATACGGTATTTATCCACAT  
-----

¶15420 ¶15430 ¶15440 ¶15450 ¶15460 ¶15470 ¶15480  
TTCATTCAAATTTGAAAGCTTAGTTTAAAGTTATAGGATTTTGAATTCCTCTTGCAATTTGAATTT  
-----

¶15490 ¶15500 ¶15510 ¶15520 ¶15530 ¶15540 ¶15550  
TGTGTACTACTTCTAGTCTCTTTATGAAAGATTCAATTCCTGCTAATCAGAATGTTAATTTCAAAG  
-----

¶15560 ¶15570 ¶15580 ¶15590 ¶15600 ¶15610 ¶15620  
CTTGTGCGATTTCTATTAGAATAGCATTAGATGTTTGTGCGTACTCATCAAAAATTTCCCAAATGAA  
-----

¶15630 ¶15640 ¶15650 ¶15660 ¶15670 ¶15680 ¶15690  
TAACATTTCTTTTACCTTCCAAGACTGGAACCGGTGGCGATCGAACAGAAAAATCAATTTGAACG  
-----

¶15700 ¶15710 ¶15720 ¶15730 ¶15740 ¶15750 ¶15760  
ATATTTACCCCATCGATCCGGCCAACAAGCATGCGATGACGGGTGAAGATAGCCGACTTGGCAATGC  
-----

¶15770 ¶15780 ¶15790 ¶15800 ¶15810 ¶15820 ¶15830  
GGTATTTTCCATCATCACTTCCACGACGACATCCAGCAAGGAGTACCGGCCCTTGGAGGTGATAC  
-----

¶15840 ¶15850 ¶15860 ¶15870 ¶15880 ¶15890 ¶15900  
GGTGGGGATTTGGGAGACCGCCGATATCTGGAGCGTGGCTGTCTGTGTGGGAGCTGGCCACCGGGA  
-----

¶15910 ¶15920 ¶15930 ¶15940 ¶15950 ¶15960 ¶15970  
CCTATCTATTGATACCCATTCGAAAAGGGCCAATAACAATCTGGATGAGGTCCATATAGCAAAAATC  
-----

¶15980 ¶15990 ¶16000 ¶16010 ¶16020 ¶16030 ¶16040  
CGAAACCTGTGGTCCGATACCGGTGATCTCATCCGCAAGGCAACACTCGAGAGATTTTCATCAATGAC  
-----

¶16050 ¶16060 ¶16070 ¶16080 ¶16090 ¶16100 ¶16110  
GCCGGCAACTATGCAACATAGAAACCTGAAGCCCTTAACTGGCCAATATCTTTAATCAGATGGTACG  
-----

¶16120 ¶16130 ¶16140 ¶16150 ¶16160 ¶16170 ¶16180  
GATGGAGGACTGCCAATCCACGGAAATTCGTTAATTTCTGATGCCATGCTGCAGACCAATCCTTGGC  
-----

¶16190 ¶16200 ¶16210 ¶16220 ¶16230 ¶16240 ¶16250  
-----



TCGCATATCCGCAAGCAAAGCCTTGGAAAGCCACTACTTATGCAACATTTGCTCTTCTGGCATTGACATT

¶16260 ¶16270 ¶16280 ¶16290 ¶16300 ¶16310 ¶16320  
GACGATTTACTACTATTATAGTGTACGTGAAATCAAGGACTGCACACATACCAGAGTGAAGAATAATGAGC

¶16330 ¶16340 ¶16350 ¶16360 ¶16370 ¶16380 ¶16390  
ATGAGGACAGCAGCAGCTGCAGTTCCATAGACAGCAGCGAATTTCCAGCGACGAGGCTCGCTATGAGGA

¶16400 ¶16410 ¶16420 ¶16430 ¶16440 ¶16450 ¶16460  
CGATGTCAACGAAGAAGACATCAAGAAGTTATATTAACAAGTGTATTTAGCCAAAGCAACGCGCAGTA

¶16470 ¶16480 ¶16490 ¶16500 ¶16510 ¶16520 ¶16530  
ACCCATATAAGTAACATCATATAACCCATATAGATATTTCAAGTTATAATAAAGTGTCCGGAGGCCATA

¶16540 ¶16550 ¶16560 ¶16570 ¶16580 ¶16590 ¶16600  
TATATACAAATTTATTTTCATGTATGTTTATTTAAAACAAAGGTGAAAACAAATATGATGAGGTTATATTT

¶16610 ¶16620 ¶16630 ¶16640 ¶16650 ¶16660 ¶16670  
GTATCACTTTAACTGAAAGTCCATCTGTGCGTATGAACGTCGAAATCTCAGGAACATATAAAGCTAGAAG

¶16680 ¶16690 ¶16700 ¶16710 ¶16720 ¶16730 ¶16740  
GTTGAGATTAAGCATAGAGATTCAGAGACATAGACGCAGTTTCTTGACACATGTTGCCACGCCCGCTCT

¶16750 ¶16760 ¶16770 ¶16780 ¶16790 ¶16800 ¶16810  
AACGCCCTCAATGTGTTGATATTTTTCACAGTTTATAGTCTTGTAAATTTCTATCAATTTGCAAAAA

¶16820 ¶16830 ¶16840 ¶16850 ¶16860 ¶16870 ¶16880  
AAAAAAAAAAAAAAAAAACTGCCACGGCAGGTTTGGCGCCACGCTTTTGAACAATTTTAAATTT  
AAAAAAAAAAAAAAAAAC  
-----  
¶14920 ¶14930

¶16890 ¶16900 ¶16910 ¶16920 ¶16930 ¶16940 ¶16950  
TTTCTCATCTTATTCCCAATATCTATCGATATCCAGAAAAATGATAACATTTGCGGTTGCGATTACAC

¶16960 ¶16970 ¶16980 ¶16990 ¶17000 ¶17010 ¶17020  
TAGCTGAGTAATGGGTATCTGATAGTCGGGAACCTCAATATGTTTATTTGATCAATTTTAAATATATA

¶17030 ¶17040 ¶17050 ¶17060 ¶17070 ¶17080 ¶17090  
AATAGTTAGATGGRTAACTTTAAAATAGTTTGGCACTGTTAAGCTTTTGGTATAAATAAATATGGTGA

¶17100 ¶17110 ¶17120 ¶17130 ¶17140 ¶17150 ¶17160  
TTTTAAAGATAAAAACCAATATGAAAATAAAACTACCAATTTCTTCAAGGTATATAATTTTACTTTTATA

¶17170 ¶17180 ¶17190 ¶17200 ¶17210 ¶17220 ¶17230  
AAATGTTTCATTTTATTCGCGTACACATGATGTCAGTAGAGAATTTTACATTTTCGAACTGGTTTA

¶17240 ¶17250 ¶17260 ¶17270 ¶17280 ¶17290 ¶17300  
AGGCCTAGTATATAAAGCATTTGGCGCAACACAGCCGAGTTGCCTCGCACAATAGAAATTCGGCTATGAT

¶17310 ¶17320 ¶17330 ¶17340 ¶17350 ¶17360 ¶17370  
TGACCCCAATAATATCGCCTTGTTTGTCTTTTCGATGCAATAACAAGAGTCATAGAATTCGGTGAACAC

¶17380 ¶17390 ¶17400 ¶17410 ¶17420 ¶17430 ¶17440  
TGTGCACACTCGAAGCAAACTCGCACAGGAAGTGCAGGAAAAGTTCTTTGAGCACTTGATGAGTATG

¶17450 ¶17460 ¶17470 ¶17480 ¶17490 ¶17500 ¶17510  
TCGTGGAGTTTCAGTAGAGTCTTAGCCAGCTTCCATCTCTTTCGTGGTCCAACAATGTTGGCTCTCT

¶17520 ¶17530 ¶17540 ¶17550 ¶17560 ¶17570 ¶17580  
TCAGTATTTTCGGGTAATTTGGTAAATCTTCCAGAGTTTCGTGCAATGGAGCAAAATACGTGTAGGT

¶17590 ¶17600 ¶17610 ¶17620 ¶17630 ¶17640 ¶17650  
GTAAGTAGTACACCGCAGTGTGCCGCGATCCTCAAGCATCTTATCGAACGAAAATATATAGTCGCTG

¶17660 ¶17670 ¶17680 ¶17690 ¶17700 ¶17710 ¶17720  
ATCCGGTGTGACATAAAATCCGAATCTTAAATGCATCCATATGCCAGCGACTCTTGGGCGTCCCTCAGTT

¶17730 ¶17740 ¶17750 ¶17760 ¶17770 ¶17780 ¶17790  
CCTGTGGCGTGAGGACCTTATCGCGGCCACGACTCTCCAATGTGTGAGGATCGCTTCAATCCCTCATC

¶17800 ¶17810 ¶17820 ¶17830 ¶17840 ¶17850 ¶17860  
CAGCAATCGGACAGCTTAAACCCTACCCGATCGAGTCTTAACTTCTTGCATCTTCGCCAGACTC

¶17870 ¶17880 ¶17890 ¶17900 ¶17910 ¶17920 ¶17930  
ACGCCAAACTGTACGTGGTCAACACGATGGCTGAGTGGATTTAGGATAGCAGATCGTTCCGACGCTTTGA

-----  
¶17940 ¶17950 ¶17960 ¶17970 ¶17980 ¶17990 ¶18000  
ATATGGTATTAAAATGCGTGCCTTTGGCCGGAGTCGACCACATAGATGATCCAATCGAAAGCTCCTCCTC

-----  
¶18010 ¶18020 ¶18030 ¶18040 ¶18050 ¶18060 ¶18070  
CAAGCGATGGCGAATGGTGCATGTCAGAGGTATCATAGTAAAGCCGCCATCCGATTTCCAGATTGTCT

-----  
¶18080 ¶18090 ¶18100 ¶18110 ¶18120 ¶18130 ¶18140  
AGAGGTATGCCAGTTTTCGTATCGTCTGGCCACATGATCTCGCGTCCCTTCCACTTCCAGCAGACCTT

-----  
¶18150 ¶18160 ¶18170 ¶18180 ¶18190 ¶18200 ¶18210  
TGCCTCGCAAGTATCCACAACGGACAGCATACGTGATGGTAGAACGATTCCCCCGTTCCTTGACGCTG

-----  
¶18220 ¶18230 ¶18240 ¶18250 ¶18260 ¶18270 ¶18280  
AATATCTAATCGTTCGTAGATCGTTGGAACCTCTTCGCGACACATTTGCAAATAGCTCCACGCGCTTA

-----  
¶18290 ¶18300 ¶18310 ¶18320 ¶18330 ¶18340 ¶18350  
ATGGAGTTCGGCACACCTTTCTGCAATGAAACCACCTCGACTGTAGGACACGTTTTTTGAACTCCTCATCTT

-----  
¶18360 ¶18370 ¶18380 ¶18390 ¶18400 ¶18410 ¶18420  
CATCGAATCGCAAGGAAGTATTATTTACCTCGAGCACATCGTAATTACTTCGTAATGTTACAAGCTTTA

-----  
¶18430 ¶18440 ¶18450 ¶18460 ¶18470 ¶18480 ¶18490  
CCGCTTCTTGGATTCCCTTGTAGAACAAATTGCAGATCACTGATCGGAGGGCTTTCATTTAGGTAGTGTGGG

-----  
¶18500 ¶18510 ¶18520 ¶18530 ¶18540 ¶18550 ¶18560  
AAACGATCTTCCAAATGGGCAATCAGCATGCCAAACTGTGTTCCTCCAGTCAACCCAGGTGGTTGATCGCGA

-----  
¶18570 ¶18580 ¶18590 ¶18600 ¶18610 ¶18620 ¶18630  
TCACATCGTGTGCGAGGAACCTCAGCAAGCGGCATAACGACTCGCCAAATGATCGTGGACCGCAAGTGACC

-----  
¶18640 ¶18650 ¶18660 ¶18670 ¶18680 ¶18690 ¶18700  
GACATGCATCTGTTTGGCAATGTTGGCGATGAAAAGTGCACAGGACTCGCTTTTTGATCACCTCTCGGC

-----  
¶18710 ¶18720 ¶18730 ¶18740 ¶18750 ¶18760 ¶18770  
GGCTTGACACCGTTACGCAATAGATTGCTTAAGGCTAAAGATGCATAATCTCTGCAAAAATTAACATTTT

-----  
¶18780 ¶18790 ¶18800 ¶18810 ¶18820 ¶18830 ¶18840  
TAATGTTTATAATGGACTTTGTGTACTTATGCCACTCACTTGTCAAGGAACACGTTTACGAAGCCAGCTC

-----  
¶18850 ¶18860 ¶18870 ¶18880 ¶18890 ¶18900 ¶18910  
CGGCAATTTCCAGCTTTTCAATGATGGTGTGATGCTGGGACGTGCTTCAACTCGGTTGCAATATCAGC

-----  
¶18920 ¶18930 ¶18940 ¶18950 ¶18960 ¶18970 ¶18980  
TGGTGTCTTATAATGCCCTTCTCTTTTCAGCTTCTGGACAATCCCATGGCAATGTTGCACTGATAGTGG

-----  
¶18990 ¶19000 ¶19010 ¶19020 ¶19030 ¶19040 ¶19050  
CCGAATTTCCGACAGCTACTATAACTGGTGAATATAACAGGCGTATCTCTGAATTCGGGAAAGCTG

-----  
¶19060 ¶19070 ¶19080 ¶19090 ¶19100 ¶19110 ¶19120  
ATGCAATCGCTGGCGAAGACCGCTTCCAGGTGTTCCGTTGATCGAAGAGGATTCCTTGGCCTTCGAAAC

-----  
¶19130 ¶19140 ¶19150 ¶19160 ¶19170 ¶19180 ¶19190  
GTCGCGCGCGCGGAGTTGATTCCTCAGCAATGGACTAACAGGAAATAAAGACATGAAATTCCTTAAG

-----  
¶19200 ¶19210 ¶19220 ¶19230 ¶19240 ¶19250 ¶19260  
CTTAAACACATTTGGGGTCATAAACTCACCTTCTTTAGGATAAACAGGCGGTTCTCAGCTTCTATTTT

-----  
¶19270 ¶19280 ¶19290 ¶19300 ¶19310 ¶19320 ¶19330  
CAATTTGAGCTGAACAAGATCGACTCCAACCTGTTCCCGCTTTTGGCAGTTTGTATTTCTTGGCGCAAG

-----  
¶19340 ¶19350 ¶19360 ¶19370 ¶19380 ¶19390 ¶19400  
GCCTTGGCTTTCAGTTCTTTAAAGCGGCATGTCATGCAAAATGTTGGCGTAAAGTAAACAGCTATTC

-----  
¶19410 ¶19420 ¶19430 ¶19440 ¶19450 ¶19460 ¶19470  
GCTTACCAGCTCCCTGAGTTTTTTCAGCTCCATATTTAGCTCGGACATGTTTCCAAATTTGACTTCTGT

-----  
¶19480 ¶19490 ¶19500 ¶19510 ¶19520 ¶19530 ¶19540  
TGCCTCGCTGATTAATAACAACAACAACAGTCCACATGGATGGCAAGTAGTGTGCACCTCGCCTA

-----  
¶19550 ¶19560 ¶19570 ¶19580 ¶19590 ¶19600 ¶19610  
TCGATAACGATAACAGCTGGTGTGATGTCACGCTCACAGTCACTTCTAGGATGTCGTTTTTCCCACTGGCA

¶19620 ¶19630 ¶19640 ¶19650 ¶19660 ¶19670 ¶19680  
TTTAAAGATTTTCTCATTGACAGTTAAACTATGCAACAGACAAATTTGATTTGTGTGCATTTAAAA

-----  
GGACATTCCAAATGTTTACTAAGAAAGAGAGTATCATCGAGTTGGATACCTGAAAAGCAGCAGCTAGAAA  
¶15130 ¶15140 ¶15150 ¶15160 ¶15170 ¶15180 ¶15190  
-----

¶19690 ¶19700 ¶19710 ¶19720 ¶19730 ¶19740 ¶19750  
TCACCTCTAAAATGTAGATGTCGGTATGTATGGCAGGCTTTTATGGCACATTTGAGAGCATGTCTTAG

-----  
TGCTTTCACFAGAATCTGTAACATATATTTGTTTATAAGTACGGCTGGCTGCACAGGACTTTCTCTTGC  
¶15200 ¶15210 ¶15220 ¶15230 ¶15240 ¶15250 ¶15260  
-----

¶19760 ¶19770 ¶19780 ¶19790 ¶19800 ¶19810 ¶19820  
ATAAATGTCAGCTGTGTGCGGTGAAAAATCGCATCGGGTTACATAGCAGCTTATGATTTTATCGATAG

-----  
AATTGATGTTTGTAGATTTAATCGCTAAAATATCCTTGATATTACTTTGATTGGGTGCAACATATAGG  
¶15270 ¶15280 ¶15290 ¶15300 ¶15310 ¶15320 ¶15330  
-----

¶19830 ¶19840 ¶19850 ¶19860 ¶19870 ¶19880 ¶19890  
ATCGACTTATCGACCACCTCTATTATGATTAATTGTGATTGTCTTTTCGCTTAAGGTCTCTTAAAACT

-----  
ATTAATTTTAAAAATTTGAACATATATTTTATGAATTTTTTGTAGACTTTAAATTAACAAGTTGCTCTTIT  
¶15340 ¶15350 ¶15360 ¶15370 ¶15380 ¶15390 ¶15400  
-----

¶19900 ¶19910 ¶19920 ¶19930 ¶19940 ¶19950 ¶19960  
TTTTATGTGTATGTGTGTTAAATTAATTTATAGATTTTGTACCTTTGTGTAATACCTATAGTCTAGTG

-----  
TTAGCGTGCATCGCTGCGATTAAATATATAAAATATAGTTAAATTAAGCACAGATTCAAATGGAAGATAT  
¶15410 ¶15420 ¶15430 ¶15440 ¶15450 ¶15460 ¶15470  
-----

¶19970 ¶19980 ¶19990 ¶20000 ¶20010 ¶20020 ¶20030  
GGCCCGCAACCTAAACTCTTTGATGTGTGCTACACACAGTCCCGAAAGATACGTGCGTGAAAACCTGGG

-----  
CAGCACCACCGGTGCGGACGGAAACAACATGCGAATCAATGCCGAAGACAATGCGCTGGATCAAATTACA  
¶15480 ¶15490 ¶15500 ¶15510 ¶15520 ¶15530 ¶15540  
-----

¶20040 ¶20050 ¶20060 ¶20070 ¶20080 ¶20090 ¶20100  
AAAACAGATGTGTGTAACGCCGCTCCCAATTAATAAATAAACTGCAATGCAGACGGTTTTTTTTGTGTTTTA

-----  
AAAGAGGTATGTATTTTACATCCTGAAACATATCATTGCCTTTATGGTGTGTTTATAAAACCTGGGAT  
¶15550 ¶15560 ¶15570 ¶15580 ¶15590 ¶15600 ¶15610  
-----

¶20110 ¶20120 ¶20130 ¶20140 ¶20150 ¶20160 ¶20170  
CAAATATAAATAGTGGATAAAAAATATTCACCGGGAACGACGGGATACATCCTATTTTATAAACAGG

-----  
-----CTTGCTGGTGAC  
CTTGCTGGTGA  
TATAGCACAACTAAAAGTAATTCAAATTTAAATGGTTAGAATCAATTGCATTTACTTTGGTGA-  
¶15620 ¶15630 ¶15640 ¶15650 ¶15660 ¶15670 ¶15680  
-----

¶20180 ¶20190 ¶20200 ¶20210 ¶20220 ¶20230 ¶20240  
AGATAAATAGTTTCTTGCATCTGTGCCACCAATTGCCAAGTGTGATGGGAATTTGATAAAGTTAA

-----  
¶20350 ¶20360 ¶20370 ¶20380 ¶20390 ¶20400 ¶20410  
AATGGGACTATATATTCACCGTTTTTATATAAGTGAATGAGTCACTCTGCTAGATAACAAGTGGTCCGA  
AT  
-AT-  
-----  
¶15690  
-----

¶20250 ¶20260 ¶20270 ¶20280 ¶20290 ¶20300 ¶20310  
AAAAGAAAAAACCATATGACGCGCAATGCAAAAAAAGTTTACTTTATTTTCATCATCTGATACGGAT  
CATTATGCAG GCAATGC AAAAAAAGTTTACTTTATTTTCATC TCTGATACGGAT  
-----CATTATGCAGGCAATGC-AAAAAAGTTTACTTTATTTTCATCCTCTGATACGGAT  
¶14940 ¶14950 ¶14960 ¶14970 ¶14980  
-----

-----  
¶20420 ¶20430 ¶20440 ¶20450 ¶20460 ¶20470 ¶20480  
TGATAAGGTATCCATTTATACACACACAGATCATCAATTAGGACATCCAAAATGTTTACCAATATAG  
ACACAC  
-----ACACAC-----  
-----

¶20320 ¶20330  
TTTACTGCAATTTCC  
TTT TCTGCAATTTCC  
TTTGTCTGATGTTCTGTGCTGGTGGTGAACAATGGTACTATATATATACACCGGCTTTATATAAGTGAAT  
¶14990 ¶15000 ¶15010 ¶15020 ¶15030 ¶15040 ¶15050  
-----

-----  
¶20490 ¶20500 ¶20510 ¶20520 ¶20530 ¶20540 ¶20550  
GAGGTTTCAACGAGCTGGACACCGAAAGAGCAGCACCAGAAATGCTGTCTCTGCAATTTATATTTTATT  
ARG ARG A C G AATG  
-----AAGTATAGGAGCCGGAATC-----  
¶15700 ¶15710  
-----

CGGCTCTGCTAGATAACAGTGTATCCGATGATAAGTTATCCATATCATACCACACAGCATTAATTA  
¶15060 ¶15070 ¶15080 ¶15090 ¶15100 ¶15110 ¶15120  
-----

-----  
¶20560 ¶20570 ¶20580 ¶20590 ¶20600 ¶20610 ¶20620  
TATAAGTTAGTGGCTGAATTCATGGACTTTTCTTTGGAATTATCGCAATATGATCCTTGTATCACTTT  
GG C  
-----GGTCC-----  
¶15720  
-----

¶20630 ¶20640 ¶20650 ¶20660 ¶20670 ¶20680 ¶20690

CAATGGGTTCAAATCGAAACTGAATTCCTAGTGCATCTTATAGACTTGAACAATAACAAGTTGCTCTCTTT

-----

¶20700 ¶20710 ¶20720 ¶20730 ¶20740 ¶20750 ¶20760  
TTAGCGTGCAGTCCGCTTCGGATTAAATATATAAAAATAGTTAAATTTAGGACACAGATTCAATGGAAAGTAT

-----

¶20770 ¶20780 ¶20790 ¶20800 ¶20810 ¶20820 ¶20830  
CAGCACCCAGGTCGGCGACGGAAACAACATGCGAATCAATGCCGAAGCAATGCGCTGGATCAAATTACG

-----

¶20840 ¶20850 ¶20860 ¶20870 ¶20880 ¶20890 ¶20900  
AAGAGGTTGTATTTTACATCCCAAAACATAGCATTCAATGTAATAATTTAAATTTGTTACTATCAACTG

-----

¶20910 ¶20920 ¶20930 ¶20940 ¶20950 ¶20960 ¶20970  
CGATTTGTACGTGCTCGTTAAACAAGAGAATTACAGCCGCAAAAGGTCGCATAATTGAAACTCTATCA

-----  
CATAATTGAAACTTATATCA  
¶15730

¶20980 ¶20990 ¶21000 ¶21010 ¶21020 ¶21030 ¶21040  
ATTAGTTGATTTAAATGAAACTGAT---TCCCTCTTTTCAGGCGGAAGCGCGACTTGTGCGCGTGCAC  
A TA TTGA TT ATGAAA TGA T CCTTCTTTT AGCGGAAAGCGCGACTTGTGCGCGTGCAC  
ACTACTTGAATTCATGAAATGAAATGTTCTCTTTAAAGCGGAAGCGCGACTTGTGCGCGTGCAC  
¶15740 ¶15750 ¶15760 ¶15770 ¶15780 ¶15790 ¶15800

¶21050 ¶21060 ¶21070 ¶21080 ¶21090 ¶21100 ¶21110  
AGGCGCGCCCGAAGCCCGGAGATTTCGCATGAGGGAGCTGGAGCGCGCAGAAAGCAGGAGATCAC  
AGGCGCG CCAGGAGCCCGGAGATTTCGCATGAGGGAGCTGGAGCGCGCAGAA GAGCAGGAGATCAC  
AGGCGCGTCCGGAAGCCCGGAGATTTCGCATGAGGGAGCTGGAGCGCGCAGAAAGCAGGAGATCAC  
¶15810 ¶15820 ¶15830 ¶15840 ¶15850 ¶15860 ¶15870

¶21120 ¶21130 ¶21140 ¶21150 ¶21160 ¶21170 ¶21180  
CGCCGACCGGGTCTTCGACATGCAAAACTCCAGCGAGTGGCGCAGCGAAACTCTGTGCGCGCATCCCGTGC  
GCGCAGCGGT TTCGACATGCA AACTCCAGCG GTGGCGCAGAAAC CTGTGCG GCATCCCGTGC  
AGCCGACCGGGTTCGACATGCAAGAACTCCAGCGCTGTGGCGCAGCGAAACTCTGTGCGTCAATCCCGTGC  
¶15880 ¶15890 ¶15900 ¶15910 ¶15920 ¶15930 ¶15940

¶21190 ¶21200 ¶21210 ¶21220 ¶21230 ¶21240 ¶21250  
CGCCTGCGCTACGGCGGACTGTTAAACGTGACCCGTGCATCAGCATCCCGCGCAGCAGTGAAGGACTCCG  
CGCCTGCGCTACGGCGGACTGTTAAACGTGACCCGTGCATCAGCATCCCGCGCAGCAGTGAAGGACTCCG  
CGCCTGCGCTACGGCGGACTGTTAAACGTGACCCGTGCATCAGCATCCCGCGCAGCAGTGAAGGACTCCG  
¶15950 ¶15960 ¶15970 ¶15980 ¶15990 ¶16000 ¶16010

¶21260 ¶21270 ¶21280 ¶21290 ¶21300 ¶21310 ¶21320  
TGGAGGAGGAGGGCAGAAGTTTTCGCACTTCAAGCACGAGCTTAAGTGGGTGCTGACATCGCAGCCAT  
TGGAGGAGGAGGGCAGAAGTTTTCG GACTTCAAGCACGAGCTTAAGTGGG GCTGA ATC A C AT  
TGGAGGAGGAGGGCAGAAGTTTTCGCGACTTCAAGCACGAGCTTAAGTGGGCGTGTATCCAACTTAT  
¶16020 ¶16030 ¶16040 ¶16050 ¶16060 ¶16070 ¶16080

¶21330 ¶21340 ¶21350 ¶21360 ¶21370 ¶21380 ¶21390  
CACCTCGATGTGATTTAAGTGGTTCGCTTTCAGGATGTTGAGGAGCGGTTTCGCAAAAGCCATGATAACG  
CACCTC ATGTGATT A G GTT TGCCTTCAGGATGTTGAGGAGCGGTTTCG AAAGCCATGATAACG  
CACCTCAATGTGATTCATGGTGTTCGCTTTCAGGATGTTGAGGAGCGGTTTCGAAAGCCATGATAACG  
¶16090 ¶16100 ¶16110 ¶16120 ¶16130 ¶16140 ¶16150

¶21400 ¶21410 ¶21420 ¶21430 ¶21440 ¶21450 ¶21460  
AACGCCAGTTGGACAACGATCGCGCTCGCAGGCTACGAAGTCAAGCTACTGAAGGACAAATGGCGAAA  
AACGCCAGTTGGACAACGATCGCGCTCGCAGGCTACGAAGTCAAGCT CTGAAGGACAAATG GAAA  
AACGCCAGTTGGACAACGATCGCGCTCGCAGGCTACGAAGTCAAGCTACTGAAGGACAAATGGCGAAA  
¶16160 ¶16170 ¶16180 ¶16190 ¶16200 ¶16210 ¶16220

¶21470 ¶21480 ¶21490 ¶21500 ¶21510 ¶21520 ¶21530  
TAATGGAAGAGTCGATGCACAACATACAGCGGAGTTCAAGGAGAAGTGCCTGACTGCAATGCCCTCAA

TAATGGAAGAGTCGATGCACAACATACAGCGGAGTTCAAGGAGAAGTGCCTGACTGCAATGC CTCAA  
TAATGGAAGAGTCGATGCACAACATACAGCGGAGTTCAAGGAGAAGTGCCTGACTGCAATGCACATA  
¶16230 ¶16240 ¶16250 ¶16260 ¶16270 ¶16280 ¶16290

¶21540 ¶21550 ¶21560 ¶21570 ¶21580 ¶21590 ¶21600  
ACGCAACTGGATCGGCCAATCTCGAGCTTAAGCTAGTACAAAGGGCAGTTAAACGAGCGCGACTCCGTTG  
ACGCAACTGGATCGGCCAATCTCGAGCTTAA CTAGTACAAAGGGCAGTTAAACGAGCGCGACTCCGTTG  
ACGCAACTGGATCGGCCAATCTCGAGCTTAAACTAGTACAAAGGGCAGTTAAACGAGCGCGACTCCGTTG  
¶16300 ¶16310 ¶16320 ¶16330 ¶16340 ¶16350 ¶16360

¶21610 ¶21620 ¶21630 ¶21640 ¶21650 ¶21660 ¶21670  
ATCGCGAACAGGGCTTCTAATTTAGCAGTTGAAAATGCCGATGGCAGCGATGCCAAGCGAGCTCATG  
ATCGCGCA CAGGGCTTCTAAT GTAGCAGTTGAAAATGC GATGGCAGCG  
ATCGCGAACAGGGCTTCTAATCTAGCAGTTGAAAATGCTGATGGCAGCG-----  
¶16370 ¶16380 ¶16390 ¶16400 ¶16410 ¶16420

¶21680 ¶21690 ¶21700 ¶21710 ¶21720 ¶21730 ¶21740  
TGAGTGTGAGAATGCCAAGGTGCTGGCCCTCCGTCAGGGTTCCTTTAGTGTATATCCCCATTGACCC

-----

¶21750 ¶21760 ¶21770 ¶21780 ¶21790 ¶21800 ¶21810  
TGGATGAGATCATTAAACAAGTTCGAGTCTTTTCGACAGCTTAGACTTAAAAAGTTCAAGTGCAGGAAA

-----

¶21820 ¶21830 ¶21840 ¶21850 ¶21860 ¶21870 ¶21880  
GCAGCGGCTCGCGGAGTGCAGAAGCTTACGAACAACCTGACGAGTAAAAAGTGAAGGATTTCC

-----

¶21890 ¶21900 ¶21910 ¶21920 ¶21930 ¶21940 ¶21950  
GGACCGCCAGTCTTTCGCAAGTTCCTTCGCGGATGAGATGATACGAGGCGCCACGCTACGTGTACCA

-----

¶21960 ¶21970 ¶21980 ¶21990 ¶22000 ¶22010 ¶22020  
TACTTACTTAAATGCCAACAATAACTTTCAGCATGTAAGTGCACCCAGTGAATATCTTTTTTATAACTAG

-----

¶22030 ¶22040 ¶22050 ¶22060 ¶22070 ¶22080 ¶22090  
CAGCCCTTTTGGCAGCACAAATAACTAACCGAGTCTTGTCAAATTTGAACATATTTCAAAATCGTATT

-----

¶22100 ¶22110 ¶22120 ¶22130 ¶22140 ¶22150 ¶22160  
ATTTGTAGTTTTTATATTTGATAACATGGCTTCAAGCAATATATATATATATATATATATATATATAT

-----

¶22170 ¶22180 ¶22190 ¶22200 ¶22210 ¶22220 ¶22230  
CCGATCGATGATCGGCCACATCTCTCGCACTTTTGTGTATCTCCATATATATCTTCAAGTTTAAAAAC

-----

¶22240 ¶22250 ¶22260 ¶22270 ¶22280 ¶22290 ¶22300  
AATAAATTTGATATAACTATTGCAGTTTGGCAGTATAGGACTGCAACATATTTGTACTATATTACGAGCC

-----

¶22310 ¶22320 ¶22330 ¶22340 ¶22350 ¶22360 ¶22370  
CTTCTTTTTTCTTATACTATCCGACAGGGGAAACAAACAAATCATTTTCAGACCAATAAATAAGCTGCA



¶23210 ¶23220 ¶23230 ¶23240 ¶23250 ¶23260 ¶23270  
TAAATGCCACATTTAAGAACAATAAATCATCGTGTAAATAAAATACATTTATTTAATTTTATTT  
TAAA GCCACATTTAA AACA TFAAA CA C TGTAAATAAAATACATTTATTTAATTTTATTT  
TAAAGCCACATTTAAAAACATTTAAAGCCACCTGTAAATAAAATACATTTATTTAATTTTATT-AT  
¶17930 ¶17940 ¶17950 ¶17960 ¶17970 ¶17980 ¶17990

¶23280 ¶23290 ¶23300 ¶23310 ¶23320 ¶23330 ¶23340  
TTTTCATGATTTTACAACATTCGACCTTCGGCGGATCTAGTGTGTGCGAATCATCTCGAGTGGCCACT  
TTTT ATGATTTTACAACATTCGACG T GCGGATCTTAGTGTGTGC AATCATCTCGAG GGCACCT  
TTTGTATGATTTTACAACATTCGACGATTCGGCGGATCTAGTGTGTGCTAATCATCTCGAGGGGGCACT  
¶18000 ¶18010 ¶18020 ¶18030 ¶18040 ¶18050 ¶18060

¶23350 ¶23360 ¶23370  
GAAAAGCATCTAGGATTCGGATTGGGTTT  
GAAAAGCATCTAGGATTCGGATTGGGTTT  
GAAAAGCATCTAGGATTCGGATTGGGTTT  
¶18070 ¶18080 ¶18090

5c)

CG32582: melanogaster (above), ananassae (below)  
Martinez/Needleman-Wunsch DNA Alignment  
Minimum Match: 9; Gap Penalty: 1.10; Gap Length Penalty: 0.33

¶4570 ¶4580 ¶4590 ¶4600 ¶4610 ¶4620 ¶4630 ¶4640  
TAACTAACGACAGAGTGTATCCATCCTGGGTGCCAGCAGCAGCATGTCGTTCAACAGCAGCGGTTGAGTCCAA  
TAACTAACGACAGCAG GT TGATCCAT CT GGTGCCAG AC AG AG AT TC TTCAACA CA GGCTT A TC A  
TAACTAACGACAGCGGTATGATCCATCTTAGTGTGCCATACAAGAAGGATATCATTCAACAACAATGGCTTATATTCAG  
¶15520 ¶15530 ¶15540 ¶15550 ¶15560 ¶15570 ¶15580 ¶15590

¶4650 ¶4660 ¶4670 ¶4680 ¶4690 ¶4700 ¶4710 ¶4720  
ATAGAATTCGATAGCCTTGTAGTACAGCTCAATGTTGGCTACCCTGGTGTATATGTCCTTAAAGTGCCTTCGGCCACG  
ATA AATTC AT GC TTGTAGTACA CTCAT TT GC AC TT GFGATATGTCCCTTAAA TG CC TC CGCCA G  
ATAAAATCAATGGCTTTGTAGTACAACCTAATATTTGCCACTTTAGTGTATAATGTCCTTAAATGACCTTCACGCCAAG  
¶15600 ¶15610 ¶15620 ¶15630 ¶15640 ¶15650 ¶15660 ¶15670

¶4730 ¶4740 ¶4750 ¶4760 ¶4770 ¶4780 ¶4790 ¶4800  
CCTCCGTGGGATGAGCCATCATGGCCAGGACGGCTTATCGTACTCTTCGTACTTATCGTACAGGAACACAGCTCCGAC  
CCTC GTGGGATGAGCCATCAT GC A AC GC TT TC TACT TCGTA TTATC TA AG AA AC A TC GAC  
CCTCAGTGGGATGAGCCATCATAGCTAAAACAGCATTGTCTACTCTTCGTATTTATCATAAAGAAAAAATTAATTCAGAC  
¶15680 ¶15690 ¶15700 ¶15710 ¶15720 ¶15730 ¶15740 ¶15750

¶4810 ¶4820 ¶4830 ¶4840 ¶4850 ¶4860 ¶4870 ¶4880  
CACAAAGTGACCGATTTCAGCGCAGCAGAACTTTTGAATGTTAACGGGACCAAGCAGCTCCAATGTTCCGGCAT  
CACAA TGAGC GATTC GC C CAGAACTTTTGG AT TTAACGGG GACCA AACG TCCA TGTT C CAT  
CACAAATGAGCTGATTCGAGCCCTCAGAACTTTTGGTATATTAACGGGTGACCAAAACAGTTCCAAATGTTCTCTCAT  
¶15760 ¶15770 ¶15780 ¶15790 ¶15800 ¶15810 ¶15820 ¶15830

¶4890 ¶4900 ¶4910 ¶4920 ¶4930 ¶4940 ¶4950 ¶4960  
TTTGGAGGTTTGAATTTTGAATAAAGATATAGCTAATTCGGTGAACATTCCTCATGTGCGCACGTTCCAGCCCCAAGCCG  
TTT GA GCTTGAATTT GAATA ATAGAG A TC GT AACTTCCTCCATGTG GCACCTTC A CCCC GC G  
TTTTGAGGTTTGAATTTTGAATAAATATAGCAAGCTTCGTAAACATTCCTCATGTGAGCACCTTCACACCCAGGGCAG  
¶15840 ¶15850 ¶15860 ¶15870 ¶15880 ¶15890 ¶15900 ¶15910

¶4970 ¶4980 ¶4990 ¶5000 ¶5010 ¶5020 ¶5030 ¶5040  
ACTCGATGAGCACAATCAATTCATCGAATATCCACGGTTTGTATAGTAGTTAATCAGATCCTCTAGCTCATCGGATGC  
A TCGAGTA CG ATCAATTCATCGAA TATCC CG TT TGATA TA TT AT A ATCCTC AGCTCATC GC TG  
ATTCGATGAGCCTATCAATTCATCGAATATCCTCGATTCGTATAAATTTATTTAAATCCTCAAGCTCATCGGCGTG  
¶15920 ¶15930 ¶15940 ¶15950 ¶15960 ¶15970 ¶15980 ¶15990

¶5050 ¶5060 ¶5070 ¶5080 ¶5090 ¶5100 ¶5110 ¶5120  
ACCACAATGTCAGCGCCGCACATCTGAGCTAGCCTAACTCCTCGGCTCCACGCGGCAAGCAGCACCTCTTCANGT  
AC AC ATGTG A CC CACAT TG GCTAGCC AAA TCCTC GC T CAC CA GC AA CA AC TC TTCA CT  
ACGATATGTGTTAACCACACATTTGGGCTAGCCGAAATTCCTCTGCATTCACACAAGCAAAACATACTTTCTCCAGT  
¶16000 ¶16010 ¶16020 ¶16030 ¶16040 ¶16050 ¶16060 ¶16070

¶5130 ¶5140 ¶5150 ¶5160 ¶5170 ¶5180 ¶5190 ¶5200  
GCGGTTGAGTTGGCTTTCCGCGCAGTCCACGGCCCTTGGAACTCCTTCAGTGTAGACCAAGTGTAGCCAGACGG  
CG GT GAGTT GCTTT CG GC GA TC ACGGCCCTTG AACTCCTT AG TA AC A GT AT GC A CG G  
TCGATGAGGTTTGGCTTTCCGACAGATTCGACGGCCCTGAACTCCTTAGATATCTACGCTAATGCTAATCCGCG  
¶16080 ¶16090 ¶16100 ¶16110 ¶16120 ¶16130 ¶16140 ¶16150

¶5210 ¶5220 ¶5230 ¶5240 ¶5250 ¶5260 ¶5270 ¶5280  
CAAAGTTGCTCACATTTGTACAGTAGTCTCGTGCATCGTACATGCGCTCGTGAAGCAACGGTTGCCAATCTCTGG  
CAAAGTTGCT AC TT TT TA AG AG TT GC GCATC TACAT CC TC T AA CAACGGT CCAAT TT TG  
CAAAGTTGCTGACGTTATTAAGCAGTTTTCAGCATCATACTTCATTAATAACAACGGTCAACAAATTTTTTGA  
¶16160 ¶16170 ¶16180 ¶16190 ¶16200 ¶16210 ¶16220 ¶16230

¶5290 ¶5300 ¶5310 ¶5320 ¶5330 ¶5340 ¶5350 ¶5360  
ATATCGGCATGTTGGGACCCGAATGAATCCTCCAGATCGGCCAGACGCTCAATGCGCGCATATAGATCAATTC  
AT TC GC TG TT GG CC GA AT AACTCCTC AGATCGGC AG C TCC GT CGCGCATA GCATA AT AATC  
ATGCTCGGTGATTTAGGCGCTGATATAAACTCCTCGAGATCGGCTAGCCTTCTGTTCCGCGCATATGCATATATTAATTC  
¶16240 ¶16250 ¶16260 ¶16270 ¶16280 ¶16290 ¶16300 ¶16310

¶5370 ¶5380 ¶5390 ¶5400 ¶5410 ¶5420 ¶5430 ¶5440  
GCTCTGATGTAGATTCGCGGCCCTTTGCGTGCATTTGAGATAGCGAAGGATCATCCCAAGACTCCACTTGC  
CT TCGAT TAAGATTC CG GCCTT TT CG GCCATTTG A TAGCGAAC AGTTC TCCA GA TCCAC TT C

ACTTTGATATAAAGATTACAGTGCCTTTTACGCGCATTGTAAGTAGCGAACAAGGTCGTCCCATGATTCACATTTAC  
16320 16330 16340 16350 16360 16370 16380 16390  
15450 15460 15470 15480 15490 15500 15510 15520  
TGCCCAATCGACGACATCGACGTAAGCGTCCGGATCATCAGCCTTGTATGACGATCGATAGCCTTTCAGCAGACCC  
TGCC AC TC AC ACATCGAC TA GC CTCGGATCATC GC TT AT TA GA TC ATAG CTC TT ACCG GC  
TGCTCATCTCACTACATCGACATATCGCACTCGGATCATCGGCTTATATATGATCAATAGACTCTTTACAGCCCT  
16400 16410 16420 16430 16440 16450 16460 16470  
15530 15540 15550 15560 15570 15580 15590 15600  
TGTCCAGTGGCCCTTGGCCAGCTGGCCAAACGGCCGGCTCAATGCACCGCTGGCGAACCTGTGTAGCCCTCCAG  
TG TGAG TG GC TT GCCA TG GACCA AC GC G TC TT CA CG TC GC AA TCGTT GCCC CTCCA  
TGTGACAGCTGAGCTTACGCAATGGGACCACTGCTGCTTGTACAACTGTCAGCAAACTCGTTGGCCCTCCAAA  
16480 16490 16500 16510 16520 16530 16540 16550  
15610 15620 15630 15640 15650 15660 15670 15680  
GTTCCTACCTGATCGATGACGACCTGATGGCCGATGCTTACATCGAACTTCTTGAAGATGGGGAAGGCTTCTTCT  
GTGTGT ACTTACG ATAG ACCTGAT GC GA GGTGT AC TC AACTTCT AA AT GC AA GCTTCTTCT  
GTGTGTACTTGAATCAAGTACCTGAATAGCGGAAGTGTTCAGTCAAACTCTTAAAAATGCAAAAGCTTCTTCT  
16560 16570 16580 16590 16600 16610 16620 16630  
15690 15700 15710 15720 15730 15740 15750 15760  
ACAACGATTAAGTACGCAATGTCGCGATGTCGCGTGCATCGATGTTCCAGCCGGTAAATGATCATGATCGG  
ACAA TG TACT AT GCAATGT GC ATGC GG GCAT TAGTT TCCA CG TT AT TA TCCATGAC GC  
ACAATGGTACTAAATGCAATGTTGCAATGTCGGGCATCATAGTTATCCAAACGATTATATATAATCCATGACCC  
16640 16650 16660 16670 16680 16690 16700 16710  
15770 15780 15790 15800 15810 15820 15830 15840  
GTCCGATCAGCTTGTAGGCTGTGAGATGAGCAAGTTTTCAGATTCGATGGTCGTAAGAGCGAGGAGTCCAGAA  
TG GCCA GC TGTAT GCTGT AGAAT AGCAA TTTTGC ATGT CGATGTC CTAAA AC GA GAGTCCA AAT  
GTACGATCTCTTGTATGCTGTAAAGATAAGCAAAATTTGTAGATACGATGGTCACTAAACACTGAGGAGTCCAAA  
16720 16730 16740 16750 16760 16770 16780 16790  
15850 15860 15870 15880 15890 15900 15910 15920  
AATCTTTCGAGAAGTTCAGCTCAGCTTGGGCAAAATGGCCGATGATGCTTTCGCTTCCAGGATGTCACCGG  
AATCTT TC AGAAGTTC AT AG TCAAT GG AAATC GC GTAT AATGTTTTCAC GT AC GA AT TCAATGG  
AATCTTTCAGAGAATCTATAAGTTCATAGTAAATCAGCAGTCAATAAGTCTTTCAGTCTCAGCAAAATATCCGG  
16800 16810 16820 16830 16840 16850 16860 16870  
15930 15940 15950 15960 15970 15980 15990 16000  
GATCTCGGCTTCGGCAAAAGCGTCTGTACCACCTGATCGATCACTGGCGCTTGTATGATTGCTCTCGAAAGAGCC  
G TC TG GT TC GACAAAGC GTCTC AC AC TGATC ATCAAC G CG TT TA GAAT T TC GAAG AC  
GGTCTGTAGTTTCAGACAAAGCCGCTCGCAACAATTTGATCAATCAACGGCAGTTTATAGGATTTGATTCGAAAGCACT  
16880 16890 16900 16910 16920 16930 16940 16950  
16010 16020 16030 16040 16050 16060 16070 16080  
TCGGCCAGAGTTCGGCCTCGGGGACCAACCAAGTAGCCTGCTTGCCTTGAACAGAGAATCTGTGTACAAAGCCG  
TC GCCA AGTTGGC TC CG CG CCAAC AA TA C GCTT CT TT AA AGAATA TCGTTTACAAAC GC  
CTCGCCACAGTTCGGCATCTGCTGCTCAACTAAATACCTGGCTTCACTTTAAATAGAGAATTTTGTGTACAACTGC  
16960 16970 16980 16990 17000 17010 17020 17030  
16090 16100 16110 16120 16130 16140 16150 16160  
GATCAGTTCGGATCGCAAAATCAGCTTCGTAGGCGACACAGCCAAATGGGGATCCCGCTTCTCGCATGAGCCGCA  
ATCAG TCGCG TC CA CC CG TC TA CGGACCA GCCA TGGGATC CG TTTCCGA TA CGACC A  
TATCAGTTCGGGTCATAAGTACCCGTTTATACCGGACCAAGCCAGTGGGATCCGCTTCTCGCAAAATCCGACCA  
17040 17050 17060 17070 17080 17090 17100 17110  
16170 16180 16190 16200 16210 16220 16230 16240  
CCACAGGCTATCGTACTGATTCCTTAAAGATATCTCCGGATGTTGTTGAGTCAATGAGATCTTGGCCAC  
CCACAG CT TCGTAGT TGAT TCCTTAAAG ATC CTC GAAATGT TT GA TCAATGTA ATCTTGGCCAA  
CCACAGCAGTCTGATGATTGTTTCTTAAAGAAATCGCTGGAATGTTATTTGAATCAATGAAATCTGGCCAA  
17120 17130 17140 17150 17160 17170 17180 17190  
16250 16260 16270 16280 16290 16300 16310 16320  
CGCTTGTGGTGGCTGGCTCGACGACCCCTGTAACCTGGGACTCCAGCCAGGGAAGGAGAAGTGTGAGCGGTGGC  
GGTTTGG GTGGC G CTC ACGCA CC TC TGAAC CG GA TC A CCA G A AGAAT TT AC CG TGGG  
CGCTTGTGGTGGCCCTCAACGCAACTTCAATGAACAGCTGATTCACCACTGCAAAAAGTTTTACGCGATTTGGC  
17200 17210 17220 17230 17240 17250 17260 17270  
16330 16340 16350 16360 16370 16380 16390 16400  
CTTCTGCACTTCTCGACCAAGTTCGTGGTGGAGAAATGCTCCCTGACACAGAGAATAGATTTTAAATATATCTTAC  
TT TC AC TC AC AGTTC TC GT GAGAAATGTC TT AC AC A AT AGATTTTAA ATATC TC C  
TTTTTCACTTCTCCCAAGTCTCTGTAGAGAAATGCTCTTTTACAACTAAGATAAGATTTTAAATGATATCTTCC

17280 17290 17300 17310 17320 17330 17340 17350  
16410 16420 16430 16440 16450 16460 16470 16480  
TGCAATCAACATCAAGAGACCACCACTACCCTGGCAAGCGGGATGGATTCACCTTTCGCACATAGATCTCAATGTAC  
TGCA TCAACATCAAGAG CCACCACTAC ACTGG AA CG GA GAAAT ACTTT TGCACATA AT TCAAT TA  
TGAGTCAACATCAAGAGTCCACCACTACCCTGGTAAACAGAGAGGATTAACCTTTTGCACATATATTTCAATAT  
17360 17370 17380 17390 17400 17410 17420 17430  
16490 16500 16510 16520 16530 16540 16550 16560  
TTCGAGAGTGTACAGTAAAGCACCAGTCTGTCACGAAATCAAAACAGATCAAAACAATAAATTAATGGTAT  
TT TG AGATT TTAC TA A GTAAG ACCAA TCGTG ACGAA TCAA CGATCAAAACAATAAATAA GG AG  
TTTTGAGAGTATTAACGATAAGTAAAGTACCAATCTGTAACGAGCAATCAATGATCACAACAATAAATAAAGAG  
17440 17450 17460 17470 17480 17490 17500 17510  
16570 16580 16590 16600 16610 16620 16630 16640  
CTGATCGTCACTGGCCCTTCAAGAGTCTTCCACCGTTCGGGATGTAGAGTGTGATTCACCGCAATTCGCT  
TGAAT GT AG TT GC TC TT A GAA TT TT ACCCTTC GGAATGACGA TTGATTC CG CAAT CGCT  
TGTATCAGTAGTTTCTTCTTTAGGAAATTTTGGCCCTTCAGAGTGTGACAAATGATTCGCAACAATACCT  
17520 17530 17540 17550 17560 17570 17580 17590  
16650 16660 16670 16680 16690 16700 16710 16720  
CCACCTCTTAATCTGATAGTCTTGCATCGCCCTGAAATGATTTGAAGTCACTTCGGATTCCTGAGAGAGTGA  
C AC TCCTTAAT TGATTAGT TT CATCG GCTGAAATGATTT AAGT AC TC GG TC TG GA AA TT ACA  
CTACTCTCTTAATTTGATAGTTTTCATCGCAGCTGAAATGATTTAAAGTGAACCTCAGGCTTTCGCAAAAATTCACA  
17600 17610 17620 17630 17640 17650 17660 17670  
16730 16740 16750 16760 16770 16780 16790 16800  
ATGCTGCTCAGAAAGTAAACGCTGCTAGCTTCTGAAACCTTCAAGACAGATCAATCAAGTCTTGGTCACTG  
ATGCTGCT AG AAGTAGAA A CGCTGCTAGT TT AA C TCGAA AGATCAAT AG GC TT T GT AG TG  
ATGCTCTTAAAGATGAAATAAACCGCTGCTAGCTTTTAAAGCTTTTGAAGAGTCAATAAGAGCTTAAAGTGAATG  
17680 17690 17700 17710 17720 17730 17740 17750  
16810 16820 16830 16840 16850 16860 16870 16880  
TTCGATGATTTGGTGGCAATTCGACAGACTCGCAAGTCTTGGGCAAAATTCGCGTAAAGCTTTCAGACATTT  
TT TC TA TTGCT GCAATCTG AC CA AT TG A CTCTGGCC AATAT GC CTAGCAT TC TT AGAAT  
TTCATGGTATTTGGTTCGCAATCGCAAAATTTGGAGTCTTGGCGTAAATGGCTGTAGCATCGCTTTAGACAT  
17760 17770 17780 17790 17800 17810 17820 17830  
16890 16900 16910 16920 16930 16940 16950 16960  
CCAGCGATCTCCACCGCAGGCTGCAAAAGAACTGACAGCAATTCGCAATCAGCATGCTGGCTGTGCAAAAGCC  
C A GAGTCTC AC GA A GTGCCAAAGAACTGACCA CAATTCGCAAT AGCATGCTG GT TGCACAAAGCC  
CTATGGAGTCTTACAGATAAAGTGCACAAAGAACTGACCAACCAATTCGGCATTTAGCATGTGAGTATGCACAAAGCC  
17840 17850 17860 17870 17880 17890 17900 17910  
16970 16980 16990 17000 17010 17020 17030 17040  
CGCTTAATGCTACAGATCCGCTGAGTCTGAGGGCGCGCTGGAGAGTCCAGCTTCTTCCGACAGTGGGCAATG  
C TT AT TCAATA AGAT GTGA TGCTC AG GC CG TG AG A TCC GC TTCC CACA TGGGCAAT TG  
CTTTGATATATAAGATCTGTGTAATGCTCAAGAGCAGTTCAGATGATCTGCTTTTCAACAAATTTGGGCAATG  
17920 17930 17940 17950 17960 17970 17980 17990  
17050 17060 17070 17080 17090 17100 17110 17120  
GGCCCGATCTGATGGGTGAACATAGCATTGCCAGGATGGCGTGGCCACACTGGGAGCAGACATGATTCATTTTCA  
GGC CGATGTA TG GT ACAT GC TT CCA AT GC TC GCCAC TG GG CGAGACAT AG TTTCTTTC A  
GGCAGATCTGATAGTAAACATGGCTTACCBAATAGCATCAGCACTGGGCGGACAGATAGGTTCTTCCAA  
18000 18010 18020 18030 18040 18050 18060 18070  
17130 17140 17150 17160 17170 17180 17190 17200  
GAGCGGCTCTGGAGGGCACCTCGCGGGAGCGTTATGCTTGGGGCTCAGCAGGAATGAGTGCATCTGCGCAC  
G A CGGCTCT AGGGCACC TC G G CG TTATG TT AG GCCTC A AG AA GC GT CACTGCTGACCC  
GTAAGCGCTGAGGGCACCTTCTGAAGCTGATTTGTTAAGAGCGCTTAAAGAAACGCTGTACACTGCTGACAC  
18080 18090 18100 18110 18120 18130 18140 18150  
17210 17220 17230 17240 17250 17260 17270 17280  
ATGAGTGTCTCATGAAGATTCACAAATGATGATGCTCCGAGTGGCTTCTTCTCGCCACCAATAGAGGCCAA  
AT GA TG TCAAT AA AT TCCAACTCTG TGAAT TCCGCA GGCCTCTC TCACCA CAT G GGC AA  
ATAGAATGTTCCATAATATATCCAACTTGGCTGATATCCGCAAAAGCTTCTTCTCGCAAAAGTGGGCAAA  
18160 18170 18180 18190 18200 18210 18220 18230  
17290 17300 17310 17320 17330 17340 17350 17360  
ACCAGCTCTGCTCGGGTTCCTTGCATCAGGAGCGCAGGAGCAAGTAACTGGGCGTATGTTGACATCTTCTGG  
CCAC CCCTG TC GC TTGCTTGGAT AC GA CGCA CAG A A TAAT GGGCT AGTT AC TT TT G  
CCACCGCTTGGTGGGATGCTTGCATACCGATCCGACAGATAAATAATAGATCAGGCTGAGATTTACTTTTGG  
18240 18250 18260 18270 18280 18290 18300 18310





GACTTGAATAGAAGGTATAGCAAAGTAGAACTCGACCTAAGCCCCCATATTTCTGTTTACACGTTGAATTAGAGCTGG

19370 19380 19390 19400 19410 19420 19430 19440  
AAACCGTGAATTTTCATAAGAAAAGTGGGAGCTTATGAATCGGATATAATCTAGTAACTCGTGCATATTGGTGGGT

19450 19460 19470 19480 19490 19500 19510 19520  
TGTACGTATGTGGATATGTAATGATGGTAGATCCAAAATATTTAATATTACTCACCTGTAATGCTCTCGAAAGCGGATG

19530 19540 19550 19560 19570 19580 19590 19600  
GGCAGTGGTTGCCGTCATCTTACTACTACAGTGAGGTCAGTTATTGACAGACCTTTACAACGTAATGTATCTTTGCGA

19610 19620 19630 19640 19650 19660 19670 19680  
AAACAATGCCAATACGATGTTTCTTGAATTGCACACTTGGTAACAGTTTGTATTGATTTGTTTCGAGGATTTATTTGTT

19690 19700 19710 19720 19730 19740 19750 19760  
GTTTAATTCGCGTTTCGAGTTTACTCGGTTTCTGGTTTAAGATTTCGGTTTCCATTGGAACGTTAGCTGCACGAAAGACAAA

19770 19780 19790 19800 19810 19820 19830 19840  
AGATTTTGGAAAACATCTAGTTATGGACAGCAGTGAATCGGCAAGAATGAGGAAAATCAAATGTGGCGTTATTTTFA

19850 19860 19870 19880 19890 19900 19910 19920  
TTGTTGATAGAAAAGTGACAGCGTCCACCGGATGAAAAAATGAAAGATAAAGGCCTATATGTATGACATATGGATGTAAC

19930 19940 19950 19960 19970 19980 19990 110000  
GCCCTTAAAATAAAACCCGAGTCTCTTATTTGTATCCCAATCGCTTTTGTGCAAGAAAATATATAGACGAAATATTTTC

110010 110020 110030 110040 110050 110060 110070 110080  
CTACGATTAATCCTTTGATGCGGTATTTTTATTCGTTTTCCTTGCCTTTTGGCACTTGGCCGTTACGACGGGAAAATACCA

110090 110100 110110 110120 110130 110140 110150 110160  
GCACTTTATTTTATTTAGGTTGAGCGAGGGAGAGAGAGAGAGAGTGAAGCGAATCAAGAGAGAGAAATTTGAAAAGAAA

110170 110180 110190 110200 110210 110220 110230 110240  
GAGCGAGCATTAATCATCAAAAATCGCTGCTCACCACAGAAAAGTACGCCATGTTGAGTTGCGCTTTGAAACAATTAGTCA

110250 110260 110270 110280 110290 110300 110310 110320  
CTGACTAATACATGTACAGCAATTTGCTCTTGTTCCTTCCCTGCTGTGTGCATGAAAATGAAAATCGCAATTTAAA

110330 110340 110350 110360 110370 110380 110390 110400  
TATCACTGTTTTGGCCCTGATAACAATGGGACAATGCCATGAAATTTGACGAAATTCGGTGTATATACATCAAAATGAGTA

110410 110420 110430 110440 110450 110460 110470 110480  
GGCGTAATTCCCAATTCACACGCACACAGCAGCAGCTCGCGCACACACTCACAGATGAGCGGCACACTGCGAGTCCGG

110490 110500 110510 110520 110530 110540 110550 110560  
CAATATGCCACATAAACAGAACATAATTAGATAAACGGTAAATTAATCGGATGCTTTTACATCAAATAAACAAAATTTG

110570 110580 110590 110600 110610 110620 110630 110640  
TATGTATATATTCGATTTGCAAGCGAACACACACAGCAGCTTTAGCAGCTTACATTTTTTCCCAATGAATCGAAAAGATAT

110650 110660 110670 110680 110690 110700 110710 110720  
TTGGAGCCCGTATGCTTACTGCAATTAACAAAAATGTACGCTAAGTACTATCATACTCGAAATAATCACCTCGGTTTGT

110730 110740 110750 110760 110770 110780 110790 110800  
TGCTAGATGACGGGCACACACTGAAGACAACTGAGCTCTTATCAAGCTCTAACAAATGTAGTTATTTTTCTTTTGT

110810 110820 110830 110840 110850 110860 110870 110880  
TTGACTAAATACTGACTGCAAGACAAGGTAGAGGTGTGAAAGTTATACAATTAATGGCCGATATATACGGCAAAATGCAA

110890 110900 110910 110920 110930 110940 110950 110960  
TTGGCGTGAATGAAAAACATCGATACCACATCAACATTCGAATCGATATTTGTATCGCAGACTCTACTGTTACACGT

110970 110980 110990 111000 111010 111020 111030 111040  
ATTTATTCATAATATTCGAATGTAATTTATTTAGGTAATGTAGTATAACTTTGTAGGAACAACAATTTATTTTAT

111050 111060 111070 111080 111090 111100 111110 111120  
TTTATCAGCTTCAATTTATTTTGGCCGATAACAAGTTTTTAGATCATAATACATACGTAAGTTAAAGGTTATTCGAG

111130 111140 111150 111160 111170 111180 111190 111200  
TGATCCAATTTGATATATCTCTAATTTGGAATCTATTTTTTATAGCAATTTAATTTGGAATGTGAAGTTATTTATCCCG

111210 111220 111230 111240 111250 111260 111270 111280  
TTACTCGTAGAGTAACAGAACACACCCAGAAAAAATTTAAATTTACAGTTTGCACACACTATCTGGCTAACGGGT

-----  
¶11290 ¶11300 ¶11310 ¶11320 ¶11330 ¶11340 ¶11350 ¶11360  
ATCTGATAGTCGGAGAACGGGACTAAAGCATTCTCTTCGTTAAATTTTAAAAATATATATACATTAATTATCTTGCTCA

-----  
¶11370 ¶11380 ¶11390 ¶11400 ¶11410 ¶11420 ¶11430 ¶11440  
AGTGCCTGGATAAAGTAGGCGATAATTTTAACTTTGTCCTATGCAATACTATTTTAAAGTAGGCGATGATTTTAACTT

-----  
¶11450 ¶11460 ¶11470 ¶11480 ¶11490 ¶11500 ¶11510 ¶11520  
TCTTCTTTTCAATACTATTTTGGACATTTTCACTCAATGTCACAGAAACAACAACCTTAGGATTTGCTCCAAACATT

-----  
¶11530 ¶11540 ¶11550 ¶11560 ¶11570 ¶11580 ¶11590 ¶11600  
TTTTTTTATTGTTTTTATCATTGGAAAACCGAGTCCCAACAATAAAATCTTAACTATAGAGTAAAGCAGCATCCGAT

-----  
¶11610 ¶11620 ¶11630 ¶11640 ¶11650 ¶11660 ¶11670 ¶11680  
TTTGAACACCTTTTGGCGATAGAACTTATACCGTCTTGACTTGACTGATCAAGGCGATGACAAAGGATGGGGCAAGGAG

-----  
¶11690 ¶11700 ¶11710 ¶11720 ¶11730 ¶11740 ¶11750 ¶11760  
CTAGACGAATTTGCGGGCTCCCGCTCGCAGATTTGCGGTAGTCTTGAACGGGGCAAGGGTCCAGCACCTCAGCAAT

-----  
¶11770 ¶11780 ¶11790 ¶11800 ¶11810 ¶11820 ¶11830 ¶11840  
TGTGAAAAGGTACACATAATCATTTTTGTCTGCGAGGCACAAAAATTTGGAATCTTTTATTAAGCAAAGCGATG

-----  
¶11850 ¶11860 ¶11870 ¶11880 ¶11890 ¶11900 ¶11910 ¶11920  
TCACCTCTACCATGAGCAATCCCTTGAGGACTTCTGAAAGTTTTTTCATTATGTCAGTGGTAAAAAACCCAGCTGGATTTG

-----  
¶11930 ¶11940 ¶11950 ¶11960 ¶11970 ¶11980 ¶11990 ¶12000  
TCCGAATTTGACCGTGTCTGATGCTTTGGCCGTTTCGAGCTGCGCCGATTTCTGCTAGGCGTCCACCCGCCAGGATTT

-----  
¶12010 ¶12020 ¶12030 ¶12040 ¶12050 ¶12060 ¶12070 ¶12080  
CCTCAACCCAGGCCATTGGGAGAGGATCCGTCGTAACAGATAAGGTAACTGATAAACTCTCGTTTCCAGGGAAA

-----  
¶12090 ¶12100 ¶12110 ¶12120 ¶12130 ¶12140 ¶12150 ¶12160  
TCTCTTTTATTAATATAAGTTCTCTACAGTATATACAGACGTTCTTACGACTCGGTTTTGGGATCTAGGAAGCCGAGGA

-----  
¶12170 ¶12180 ¶12190 ¶12200 ¶12210 ¶12220 ¶12230 ¶12240  
TAAATGGCAGAATGCTGGGACTCTGAGCTTTTGCATCATATTTTATGATAACATAAAGATACCACCTAAATCTGTTT

-----  
¶12250 ¶12260 ¶12270 ¶12280 ¶12290 ¶12300 ¶12310 ¶12320  
TTTATTTTCTCGTTTTTCATGTTTACCTAGATTTTAAATATAATTTTACATTTGAACCGTGTGTCTCAATCAAT

-----  
¶12330 ¶12340 ¶12350 ¶12360 ¶12370 ¶12380 ¶12390 ¶12400  
ATACCCCTTCTCTGTTGGGAGCAATAAATGCAAGTTCCAATTTTATATACCGTTACTCGTAAGGGTAAGATTCTGTGA

-----  
¶12410 ¶12420 ¶12430 ¶12440 ¶12450 ¶12460 ¶12470 ¶12480  
AACTGGCAGAAAGGAGCGTTTCGACCATATAATCTATATATATATATATCTTGTGATCAGGAGAAATAGCCGAGTCTGA

-----  
¶12490 ¶12500 ¶12510 ¶12520 ¶12530 ¶12540 ¶12550 ¶12560  
TCTGGTATGTCCTGCTGTCGATGAACTGAGAACTATAAAAGCTAGAAGTTGAGAGTCCCAAGTTGAGATCCATG

-----  
¶12570 ¶12580 ¶12590 ¶12600 ¶12610 ¶12620 ¶12630 ¶12640  
TTGCCACGCCACTCTAACGCCATAATACAGCCCGCCAGATTTATCGCCGTGAGTAACTGATGTAATCGAAGGATTACA

-----  
¶12650 ¶12660 ¶12670 ¶12680 ¶12690 ¶12700 ¶12710 ¶12720  
GCGCCGCGACATGGGCGGAACTTTGTGGTCCCGCGATGGCAGGGCGACAGGATCACAGATTTCCGCGGACAGCTGC

-----  
¶12730 ¶12740 ¶12750 ¶12760 ¶12770 ¶12780 ¶12790 ¶12800  
GGGGATACCTTGGTGGAAATGCGTGGATTCGTTACGATTTCCAGGACATTTGGTAGCATCCACAATGGGGTTTGTCC

-----  
¶12810 ¶12820 ¶12830 ¶12840 ¶12850 ¶12860 ¶12870 ¶12880  
CATAAAAAGTAACTGCGCAGGATGCGGTTTGTGTAACGATCCAGGATCAGGAGACATTTTATGACGATCATATCGTCCG

-----  
¶12890 ¶12900 ¶12910 ¶12920 ¶12930 ¶12940 ¶12950 ¶12960  
GCATATCTCGTACATCCGCTGCATGGCGTGATAAATGATCCAGCCGATCAGATTTCCACAACGATTCAATGCGCATAA

-----  
¶12970 ¶12980 ¶12990 ¶13000 ¶13010 ¶13020 ¶13030 ¶13040  
ATGAAAATCATCACAAGTATTATAAAGTATTAAAGAAAGAAATCTTTAGAAAATGCAATCTGATGAACATCTGGTGT

-----  
¶13050 ¶13060 ¶13070 ¶13080 ¶13090 ¶13100 ¶13110 ¶13120  
GTATGTAGAGCTATAATATAAATTTAAATATATTTATTAATGCTAAGAACTTTGCTATCTGTGATTTCTAAATTT

-----  
¶13130 ¶13140 ¶13150 ¶13160 ¶13170 ¶13180 ¶13190 ¶13200  
TCTGATCAAGTGGCATTGAAAATAACATTTTGTGTTTTGTGACTTTCGTATCAGTAAAACAGCAGTTAAACATTTGCC



TCGACGGGTTTATGATGATGAGCGATGCCGATTGCCGTACGGTGCGAGAATTCCAAAGTTGCCGCAAAATGGAGGGCATGGAA

¶15210 ¶15220 ¶15230 ¶15240 ¶15250 ¶15260 ¶15270 ¶15280  
TACAAATGCGACAGGATAAACCTGTGTTTAAAGAGTCCAGAGCTCTTCTTGGGATATGTGCTCGAATATATCAAGAATT

¶15290 ¶15300 ¶15310 ¶15320 ¶15330 ¶15340 ¶15350 ¶15360  
GGATGAGAAGGAGCTTAGCACTCAGGACAAGCGGAGCGCTTCACCGAGGCCAGTGGACCTGGCCAGACAAAAGAATT

¶15370 ¶15380 ¶15390 ¶15400 ¶15410 ¶15420 ¶15430 ¶15440  
CCAGTCCCGATTGAGATTGGCATCGAATGCTGCATATACGGTATTTTATCCACATTTCCATTCAAAATTTGAAAAGCTTA

¶15450 ¶15460 ¶15470 ¶15480 ¶15490 ¶15500 ¶15510 ¶15520  
GTTTAAAAGTTATAGGATTATGAATTCCTCTTGCATTTGAATATTTTGTAGTCTACTTCTAGTCGCTTTATGAACGAT

¶15530 ¶15540 ¶15550 ¶15560 ¶15570 ¶15580 ¶15590 ¶15600  
TTCAAATCTCTGCTAATCAGAATGTTAATTTCTAAAGCTGTGCGCATTTCTTATAGAAATAGCATTAGATGTTTTTGTGCT

¶15610 ¶15620 ¶15630 ¶15640 ¶15650 ¶15660 ¶15670 ¶15680  
ACTCATCAAAAATTCCAAATGAATTAACCATTTCTTTTCCACCTTCCAAGACTGGAAACCGTTGGCGCATCGAACAGA

¶15690 ¶15700 ¶15710 ¶15720 ¶15730 ¶15740 ¶15750 ¶15760  
AAATCAATTTGAACGATATTTACCCCATCGATCCGGCCAACAACGAATGCGATGTACGGGTGAAGATAGCCGACTTGGG

¶15770 ¶15780 ¶15790 ¶15800 ¶15810 ¶15820 ¶15830 ¶15840  
CAATGCGGTTATTTCCATCATCACTTCACCGACGACATCCAGACCAAGGAGTACCGGGCTTGGAGGTGATACTCGGTG

¶15850 ¶15860 ¶15870 ¶15880 ¶15890 ¶15900 ¶15910 ¶15920  
CGGATATTCGAGACCCCGATATCTGGAGCTGGCCGTGCTGTTGTGGAGCTGGCCACCGGACCTATCTATTTCGAT

¶15930 ¶15940 ¶15950 ¶15960 ¶15970 ¶15980 ¶15990 ¶16000  
ACCCATTCGAAAAGGGCAAAATCAATCTGGATGAGGTCCATATAGCGAAAATCTCGAAAACCTGTGGTTCGATACCGGTG

¶16010 ¶16020 ¶16030 ¶16040 ¶16050 ¶16060 ¶16070 ¶16080  
GTATCTCATCCGCAAGGCAACACTCGAGGAATTTCAATCAATAGCCCGGCAAACTATGCAACATGAAAACCTTGAAGC

¶16090 ¶16100 ¶16110 ¶16120 ¶16130 ¶16140 ¶16150 ¶16160  
CCCTTAAACTGCGCAATATCTAATCAGATGGTACGGATGGAGGACTCGCCAATCCACGGAATTCGTTAATTTCTCGATG

¶16170 ¶16180 ¶16190 ¶16200 ¶16210 ¶16220 ¶16230 ¶16240  
CCCATGCTCGACAGCAATCCTTTGTCTCGCATATCCGCAAGCAAGCCCTTGGAAAAGCCACTACTTATGCAACATTTGCTCT

¶16250 ¶16260 ¶16270 ¶16280 ¶16290 ¶16300 ¶16310 ¶16320  
TCTTGGCATTGACATTGACAGTTACTACTATTATAGTGTACGTGAAATCAAGGACTGCACACATACCAAGATGAAAGAA

¶16330 ¶16340 ¶16350 ¶16360 ¶16370 ¶16380 ¶16390 ¶16400  
ATAGCGATGAGGACAGCAGCTGCAGTTCCATAGACAGCAGCAATTTCCAGCGACGAGTCTGCTATGAGGACGAT

¶16410 ¶16420 ¶16430 ¶16440 ¶16450 ¶16460 ¶16470 ¶16480  
GTCAACGAAGAAGACATCAAGAAGTTATATTAACAGTGATTTTATAGCCAAAAGCACAGCCAGTAACCATATAAGTAA

¶16490 ¶16500 ¶16510 ¶16520 ¶16530 ¶16540 ¶16550 ¶16560  
CFCATATAACCCATATTAGATATTTCAAGTTATAATAA--AGTGTCCGGAGCCATATATATACAAAATTTATTTTCATG-

AGATATTTCA G AT TAA AGT T C A A A T TA AAA TT CAT  
-----AGATATTTTCATGC-ATGGTAACTAGTCACTAATGTA-ACCTGTAAAAAGTTTCAACATAC  
                  ¶20120            ¶20130            ¶20140            ¶20150            ¶20160            ¶20170

¶16570 ¶16580 ¶16590 ¶16600 ¶16610 ¶16620 ¶16630  
TATGTTTATTTAAAACAAGGTTGAAAACAATTTATGATGAGG-TTATATTGTATC---ACTTTAACGAAAGTCCATCTG  
T T TTTA A A CAAAG T A G T GG TTA A TG T A TTTAA AA G AT TG  
TTTCTTAAAACACCAAGTTTCCGATCTCCCGGTTATGGATTAACGTAGTGCAAAAGTTTAAAAAAGGAGGATATG  
                  ¶20180            ¶20190            ¶20200            ¶20210            ¶20220            ¶20230            ¶20240            ¶20250

¶16640 ¶16650 ¶16660 ¶16670 ¶16680 ¶16690 ¶16700 ¶16710  
TCCGTA-TGAACGTCGAAATCTCAGGAACATAAAAAGCTAGAAGTTGAGATTAAGCATAGAGAT--CTAGAGACATAG  
T C T T AA GTC A A CT AA TA A A T G TTG G AAGCA A AGA CTA A TAG  
TGCATGTTTAAAGTCAATAGCTTAAAAATAGGAGCTT----GTTGGCTGAAGCAGACAGCGGACTAATCAACTAG  
                  ¶20260            ¶20270            ¶20280            ¶20290            ¶20300            ¶20310            ¶20320            ¶20330

¶16720 ¶16730 ¶16740 ¶16750 ¶16760  
ACGCGATTTCTTGACACATGTTGCCAGCCCGCTTAAACGCCCTCAATG  
G TC C C TG A C C C C AA T A G  
TACAGGAATCC---CTCGTGGATGGATTCTCTCACCAAAATT-TAAGCG  
                  ¶20340            ¶20350            ¶20360            ¶20370

5d)

CG32582: melanogaster (above), ananassae (below)  
Martinez/Needleman-Wunsch DNA Alignment  
Minimum Match: 9; Gap Penalty: 1.10; Gap Length Penalty: 0.33

¶10290 ¶10300 ¶10310 ¶10320 ¶10330 ¶10340 ¶10350 ¶10360  
CCCTCCCCCTGGTGTGATGAAAATCGAAAATCGCATTTAAATATCACTGTTTTGCCCTCGATAACAATGGGACAATCG  
CCTCCCCCTG  
GCCTCCCCCTG  
-----  
¶10

¶10370 ¶10380 ¶10390 ¶10400 ¶10410 ¶10420 ¶10430 ¶10440  
CATGAAATTTGACGAAATTCGGTGTATATACATCAAATGAGTAGCGGTAATTTCCCAATTCACACGCACACAGCAGCACTC  
CCC  
-----  
-CCC-

¶10450 ¶10460 ¶10470 ¶10480 ¶10490 ¶10500 ¶10510 ¶10520  
GCGCACACACTCACAGATGAGCGCGCACACTTGCAGTGCAGCAATATGCCACATAACAAGAACAATAATAGATAAAC  
A C GCAC CT AGT T C C T A AAG A T  
-----ACCTAGCACCT---AGT-----TTCGTCTTAGAAAGAGTT-----  
¶20 ¶30 ¶40

¶10530 ¶10540 ¶10550 ¶10560 ¶10570 ¶10580 ¶10590 ¶10600  
GGTAAATTAATCGGATGCTTTTACATCAAATAACAAAATTTGTATGTATATTTGCATTTGCAAGCCACACACACACG  
GGT A TT  
GGTCA---TTT-----  
¶50

¶10610 ¶10620 ¶10630 ¶10640 ¶10650 ¶10660 ¶10670 ¶10680  
CACTTTAGCACTTTACATTTTTTCCCAATGAATCGAAAGATATTTGGAGCCCGTATGCTTACTGCAATTTAACAATAATG  
-----

¶10690 ¶10700 ¶10710 ¶10720 ¶10730 ¶10740 ¶10750 ¶10760  
TACGCTAAGTACTATCATACTCGAAATAATCACTGCGGTTTGTGCTAGATGACGGGCACACACTGAAGACAACATGA  
-----

¶10770 ¶10780 ¶10790 ¶10800 ¶10810 ¶10820 ¶10830 ¶10840  
GCTCTTATCAAGCTCTACAAAATGTAGTTTTATTTTTCTTTGTTGACTAAATACTGACTGCAAGACAAGGTAGAGGTGT  
-----

¶10850 ¶10860 ¶10870 ¶10880 ¶10890 ¶10900 ¶10910 ¶10920  
GAAAGTTATACAATTAATGCGGATATATACGGCAAAATGCAATTCGCTGGAGTGAAAAACATCGATACCACATTTCAAC  
-----

¶10930 ¶10940 ¶10950 ¶10960 ¶10970 ¶10980 ¶10990 ¶11000  
ATTGCAATCGAATTTGTATCGCACGATCCTACTGTTACACGTAATTTATTCATAATATTCGAATGTAATATATTTAGG  
-----

¶11010 ¶11020 ¶11030 ¶11040 ¶11050 ¶11060 ¶11070 ¶11080  
TAAATGATGATAACTTTGTAAAGGAACAACAATTTATTTATTTATCAGCTTCATTTATATTTTGGCGATAACAAGTT  
-----

¶11090 ¶11100 ¶11110 ¶11120 ¶11130 ¶11140 ¶11150 ¶11160  
TTTAGATCATAATACATACGTAAGGTTAACAGGTGTTATCGAGTATCCAATTTGGATATATTTCTTAATTTGAAATCTAT  
-----

¶11170 ¶11180 ¶11190 ¶11200 ¶11210 ¶11220 ¶11230 ¶11240  
TTTTTATAGCAATTTAATTTGGAATGGAAGTTATATACCCGTTACTCGTAGAGTAAACAACAACACACCCAGAAAAAAT  
-----

¶11250 ¶11260 ¶11270 ¶11280 ¶11290 ¶11300 ¶11310 ¶11320  
TATTAATTTACAGTTTGCACCTCACACTATCTGCGTAACGGGTACTGTAGTCCGAGAACGGGACTAAAGCATTTCTCTT  
-----

¶11330 ¶11340 ¶11350 ¶11360 ¶11370 ¶11380 ¶11390 ¶11400  
TCGTTAATTTTTAAAAATATATATACATTAATTTATCTTGCTTAAGTGTGGATAAAGTAGGGATAATTTTAACATTG  
-----

¶11410 ¶11420 ¶11430 ¶11440 ¶11450 ¶11460 ¶11470 ¶11480  
TTCTATGCAACTACTATTTTTAAGTAGGCGATGATTTTAACTTGCTTTTTCAACTACTATTTTGACATTTACACTCA  
-----

¶11490 ¶11500 ¶11510 ¶11520 ¶11530 ¶11540 ¶11550 ¶11560  
ATGTGCTACAGAAACAACAACCTTTAGGATTTGCTCCAACAATTTTTTATTGTTTTTATCATTGTGAAAACCGAGTCCC  
-----

¶11570 ¶11580 ¶11590 ¶11600 ¶11610 ¶11620 ¶11630 ¶11640  
AACAATAAAATCTTAATCTATGAGGTAAGCAGCAGTATCCGATTTTGAAGCACCTTTTGGCGATAGAATCTATACCGTCT  
-----

¶11650 ¶11660 ¶11670 ¶11680 ¶11690 ¶11700 ¶11710 ¶11720  
TGACTTGACTGATCAAGGCGATGACAAAGATGGGGCAAGGAGCTAGACGAATATTGCGGGCCTCCCGCTCGCAGATTTG  
-----

¶11730 ¶11740 ¶11750 ¶11760 ¶11770 ¶11780 ¶11790 ¶11800  
CGGTAGTCTTCGAAGCGGGCAAGGCTCCAGCACCTCAGCAAGTTGTGGAAGAAGGTACACATAATCATTTTGCTCTGCAG  
-----

¶11810 ¶11820 ¶11830 ¶11840 ¶11850 ¶11860 ¶11870 ¶11880  
GCACAAAAATTTGGAATCTTTTTATTAAGCAAAAGCGATGTCACCTCTACCATGAGCAATCCCTTGAAGACTTCTG  
-----

¶11890 ¶11900 ¶11910 ¶11920 ¶11930 ¶11940 ¶11950 ¶11960  
AAAGTTTTCTATTTGCGATGGTAAAAACCCAGCTGGATGTCGCAATTTGACCGATGCTCGATGCTTTGGCGGTTCG  
-----

¶11970 ¶11980 ¶11990 ¶12000 ¶12010 ¶12020 ¶12030 ¶12040  
CAGCTGCGGCATTTCTGCTAGGCGTCCACCCCGCCAGGATTTCTCAACCCAGGGCCATTTGGAGAGAGATCCGTCGCTA  
-----

¶12050 ¶12060 ¶12070 ¶12080 ¶12090 ¶12100 ¶12110 ¶12120  
ACAGAATAAGTAAACTGATAAACTCTCGTTTCCCAGGAAATCTTTTTATTAATATAAGTTTCTTCTACAGTATATAC  
-----

¶12130 ¶12140 ¶12150 ¶12160 ¶12170 ¶12180 ¶12190 ¶12200  
AGACGTTCTTACGACTCGGTTTGGGATCTAGGAAGCCAGGATAAATGGCAGAATGCTGCGGACTCTGAGCTTTGTCAA

¶12210 ¶12220 ¶12230 ¶12240 ¶12250 ¶12260 ¶12270 ¶12280  
TCATATTCATTTGATAACATAAAGATACCCTAAATCTGTTTTATTTTTCTCGTTTTCATGTTTACCCTAGATTTATT

¶12290 ¶12300 ¶12310 ¶12320 ¶12330 ¶12340 ¶12350 ¶12360  
TTAATATATATTTACATGAAACGTTGTGTCATTCAAATAATATACCCTTCTCTGTGGAGCCAAATAAATGCAAGTT

¶12370 ¶12380 ¶12390 ¶12400 ¶12410 ¶12420 ¶12430 ¶12440  
CCAATTTTTATACCCTTACTCGTAAGGTAAGATTCGTTGAAACTGGCAGAAGGAGCGTTCCGACCATATAACTTA

¶12450 ¶12460 ¶12470 ¶12480 ¶12490 ¶12500 ¶12510 ¶12520  
TATATATATATATTTGATCAGGAGAATAGCCGATCGATCTGGTCAATGTCCTCTGTCGCTATGAACGCTCGAGAA

¶12530 ¶12540 ¶12550 ¶12560 ¶12570 ¶12580 ¶12590 ¶12600  
CTATAAAGCTAGAAGTTGAGAGTCCCAAGTTGAGATCCATGTTGCCACGCCACTCTAACGCATAATACAGCCCCC

¶12610 ¶12620 ¶12630 ¶12640 ¶12650 ¶12660 ¶12670 ¶12680  
CAAGATTATCGCGTGAAGTAAATCGAAGGATTACAGCGCCCGACATGGCGCGAACTTTGTGGTCCGCCG  
GATGTAATC AA TTT  
-GATGTAATC -AATTTTC-----  
960 970

¶12690 ¶12700 ¶12710 ¶12720 ¶12730 ¶12740 ¶12750 ¶12760  
GATGGCAGGCGACAGGATCACAGATTCGCGGACAGCTGCGGGGATACCTTGGTCGGAATGCGTGGATTGTTACGA

¶12770 ¶12780 ¶12790 ¶12800 ¶12810 ¶12820 ¶12830 ¶12840  
TTTCCAGGACATTTGGTAGCATCCACACAATGGGGTTTTGTCCATAAAAAGTAACCTGCCAGGATGCGGTTTTGTGTAAC

¶12850 ¶12860 ¶12870 ¶12880 ¶12890 ¶12900 ¶12910 ¶12920  
GATCACCGATCAGAGGACATTTATGCAGCATCATATCGTGGCGCATATCTGCTACATCCGCTGATGGCGTATAAAT

¶12930 ¶12940 ¶12950 ¶12960 ¶12970 ¶12980 ¶12990 ¶13000  
GATCCCGCATGATCAGATTCCCAACAGATTCAATGCGCATAAATGAAAATCATCAAAAGTATTATAAAGTATTTAAGA

¶13010 ¶13020 ¶13030 ¶13040 ¶13050 ¶13060 ¶13070 ¶13080  
AAGAAATCTTTAGAAATGCAATCTGATTGAACATCTGGTGTGTATCTAGAGCTATAATATAAAATTTAAATATATTTA

¶13090 ¶13100 ¶13110 ¶13120 ¶13130 ¶13140 ¶13150  
TTAAATGCTAAGAAGCTTTGCTAT--CTGTGAGTTTCTAAATTTCTGATCAAGTGGGCATTGAAAATAACATTTTGT  
AGAACTTTG T C TG TTT T A T T T AT GT G G A C T G  
-----AGAACTTTGCTGTGGCCAAATGGTTTTATGAGCTCTATAATGG-GTCAGACGAGTTACGGCCCTCTGCG  
980 990 1000 1010 1020 1030 1040

¶13160 ¶13170 ¶13180 ¶13190 ¶13200 ¶13210 ¶13220  
GTTTTG----TGACTTTCGTATCAGFAAAGCAGCAGTTAATTTGGCCAGCA--CCATGAAAACAG--CTCCGAAA  
TG CT CG A GT A G C T TT GG A A C A G A C A G C C G A  
CACACGACCATGCTCCCGGAGCGTTGCA-GTCGCGTCCGCTTGGGTACTATGCGACCCAGCAGTGGACGCGCAGC  
9150 9160 9170 9180 9190 9200 9210 9220

¶13230 ¶13240 ¶13250 ¶13260 ¶13270 ¶13280 ¶13290 ¶13300  
AATTTACCAA--ATAAGACCGTTGAAAATATTTTACAAAAGTAAAAGGCGAGAAAATAGCCTTTTTCTACGTTTATA  
T CC AA ATA AC GA AA A A TA AA GCA AA AGCC C AC A A  
TCGTCGCCGAGGATAGCACCGAGGATAACAGCG---ACCACTACAA--GCAACAA---AGCCAACAACAACAACA  
9230 9240 9250 9260 9270 9280 9290

¶13310 ¶13320 ¶13330 ¶13340 ¶13350 ¶13360 ¶13370 ¶13380  
CATATTTGGTA--AAATTTCCAAAC--CCAAGTATTTGTATCCAGGAACAGAAGGTA--AGTTTCAAATTTAAACATTTT  
A A G A AA AAAC CCAA TT TA C ACA G TA A T T AAA AAC ATT T  
-ACAACGCAACGAGCAGGAAACGCCAACGCTTATTAAAC---ACAT--GCTAGCATTTATAAAGATAAATATTAT  
9300 9310 9320 9330 9340 9350 9360

¶13390 ¶13400 ¶13410 ¶13420 ¶13430 ¶13440 ¶13450 ¶13460  
GTAGACCAATCGGTCTCACCAACCTCAATCAATTTTGGTCCAAATTAATAAATAAATAAATAAATAAATAAATA  
TA GT T A A C T AA AC T A A TTT GT CA T A AA AAA A AA A  
-TA-----GTTTTAATGAGCTTTAA--ACCGTTTAGA-TTTATGTAGCACCTTACTGAATAAACAATACGTA  
9370 9380 9390 9400 9410 9420

¶13470 ¶13480 ¶13490 ¶13500 ¶13510 ¶13520 ¶13530 ¶13540  
AAAAAAAATTTCCAACCTCCTTGGGAAAAGTAAGCTTTGCGTAGATTATCGGACAAACATTTTTTTTTCGTTTACGCCCA  
AA ATCGGA A T CGT A  
TGAA-----ATCGGAGA-----TGCGTAAA-----  
9430 9440

¶13550 ¶13560 ¶13570 ¶13580 ¶13590 ¶13600 ¶13610 ¶13620  
TCCATTCAATTTAGTTTCACTGAAGGCAAGTGTATTTTCCAATTCGTTGTTAGTTTGCAGATTTTCAATCATTTGGTTGAT  
TA TC TCG A CCAA T TT TC  
-----TATCTCTCGGAAAA-----CCAATTTATAC-----TC-----  
9450 9460 9470

¶13630 ¶13640 ¶13650 ¶13660 ¶13670 ¶13680 ¶13690 ¶13700  
AAAAAATAAATACTACACACAGCTACAGTACTCGTATTTTCAATTTGAAAATTTCCGCAAAAACAGAAAAA

¶13710 ¶13720 ¶13730 ¶13740 ¶13750 ¶13760 ¶13770 ¶13780  
CTAATAAGAACATTAACCATTCTCGCGAGCTAGCAATCCAAGTGAAGTAATCATGTTTAAATGAAACGAACGAGAG

¶13790 ¶13800 ¶13810 ¶13820 ¶13830 ¶13840 ¶13850 ¶13860  
TAATCAGACGCAAGCAGCATTATCAGGCTTCAAGAGGCGCTCCAGGAAAAGATTCCGAAACAGATGGAATCGTGT

¶13870 ¶13880 ¶13890 ¶13900 ¶13910 ¶13920 ¶13930 ¶13940  
GGCGTACTCAATGGGAAACGCATCAACGCAACAGTGAATGTGCCGATGGATGTGGATGCGGATATGGGAGCGAAAAT

¶13950 ¶13960 ¶13970 ¶13980 ¶13990 ¶14000 ¶14010 ¶14020  
GTCGGAAGATGGAATGACTGATACATCGAATACGGTCAACAGCCATCTTGTCCAAAGGATCAAAAGCAATTTGTCGCGAA

¶14030 ¶14040 ¶14050 ¶14060 ¶14070 ¶14080 ¶14090 ¶14100

ACA AAAAGCCATCCCATCCTACAACCACCAGGAGCAGATCGAAACAAAGAGCAAAGCGACCAAGATATGTAAAAAAGG

¶14110 ¶14120 ¶14130 ¶14140 ¶14150 ¶14160 ¶14170 ¶14180  
TCGCAACAGAAAAGCAATGCCTATCGCTCTCCGATGATGGAATTGCCGGCAGAAAACCGCCAAAATTTAATAAGTA

¶14190 ¶14200 ¶14210 ¶14220 ¶14230 ¶14240 ¶14250 ¶14260  
TAGCGAATCTAGCTACGGCAGCGAATCCAGCATGCCGTTGCAAAATGAACAGCAGAGCAATGACAACTCAGAATAACAATG

¶14270 ¶14280 ¶14290 ¶14300 ¶14310 ¶14320 ¶14330  
ACAATGCTGAGGGTATGGATTTGATCGACAGGAGAGCGCCCAACGAGTATGTTA--TCGGTG-GCTATCATCCGGTGGCC  
ACGAGTATGT T TG GC T T CG T  
-----ACGAGTATGTGTTAAATGAGCATTTCACGCTT-----  
          ¶480       ¶490       ¶500       ¶510

¶14340 ¶14350 ¶14360 ¶14370 ¶14380 ¶14390 ¶14400 ¶14410  
ATTGCGGAT-GTATTCGTAAACCGCTATCATGTCPTCAAAAAGCTGGGCTGGGTCACCTCTCCACCGTGGCTATGCT  
A TGG GAT G A T GT   TAT AT   A A C   T GGT A CT A T TA C  
AGTGG-GATAGCACTAGTTGTTTATATAATAAAGAAAGCAACAACCT--GGTTAAACTAAA AAAACTAA-TAAACA  
          ¶520       ¶530       ¶540       ¶550       ¶560       ¶570       ¶580

¶14420 ¶14430 ¶14440 ¶14450 ¶14460 ¶14470 ¶14480 ¶14490  
ATGATACCAGATGGATCGCTACTG--TGCCGTCAAGGTGTCCAAGTCGGCGCAGGCTACAAGGAAACTGGTATCGATGA  
ATGA C AGA G T G T CTG T C CAAG T CA T C TC A AAG A CT T A  
ATGAAGCAGAGACAGCT--GTTGCTGCTATCTACAAGATTAACA--TAAACTA---TCGATAAAGAATGCTACTTAACAGCG  
          ¶590       ¶600       ¶610       ¶620       ¶630       ¶640       ¶650       ¶660

¶14500 ¶14510 ¶14520 ¶14530 ¶14540 ¶14550 ¶14560 ¶14570  
GATATGCTCTTTTCCAAATGAGCCTACAGCATCAGCATAAGTACAGAGCCACCTGGTGGTCTTCTACGATTTCTTTG  
GAT A CT TT CAA GAG TA A A ATA A AG AG A T G CT  
GATAACAGACTGTTAACAACAGAGGTTAGA--AGGATTATAGCAATAGCAGTTA--TTTATAGCACT-----  
          ¶670       ¶680       ¶690       ¶700       ¶710       ¶720

¶14580 ¶14590 ¶14600 ¶14610 ¶14620 ¶14630 ¶14640 ¶14650  
AAAATTACCGGACCGCACGGAAGGCACATTTGCCTGGTCTTAGAGGTTCTCGGTGACAATTTGCTAAAAGTCATCGAAAGA

¶14660 ¶14670 ¶14680 ¶14690 ¶14700 ¶14710 ¶14720 ¶14730  
TGCTTTTCAAAAGGATGCCCATTTCCAATATCAAGCAAAATGCCAGCAGGTGCTCACGGGCTAAAAGTTTCTGCACGA

¶14740 ¶14750 ¶14760 ¶14770 ¶14780 ¶14790 ¶14800 ¶14810  
AGAGTCCGGGATCATACACACCGATCTAAAGCCGGAGAAATGTGCTCTCCGCTCCAAGAGTGTCCGTTCCGGACCGAGA

¶14820 ¶14830 ¶14840 ¶14850 ¶14860 ¶14870 ¶14880 ¶14890  
TCAGACGGCAATGAAGTATATTTGAAGGCCAACAGGGGAAACTAAGTCTTAGGTATGTTAGATATACTCGTATAATA

¶14900 ¶14910 ¶14920 ¶14930 ¶14940 ¶14950 ¶14960 ¶14970  
GCACACATCTGAACAGGTATAAACGTTATAGCTCCAAGATGACCAAAAACGGCCAAGAGACGGATGTCAGGCAAAAGTCCAAG

¶14980 ¶14990 ¶15000 ¶15010 ¶15020 ¶15030 ¶15040 ¶15050  
AAGGTGATATCGTTTTTCAAGAAATCATCCGCCATGCTCCGACGGCAGGGCATCGAGGATCTGCTATCTGCGCCGAAG

¶15060 ¶15070 ¶15080 ¶15090 ¶15100 ¶15110 ¶15120 ¶15130  
TGGCCTCATCGAACCGATTACCGCCGGCCATGGCCGCTCCGATAAATTACCAATTCATCCCTTCGGCTTCGACGGGTTTA

¶15140 ¶15150 ¶15160 ¶15170 ¶15180 ¶15190 ¶15200 ¶15210  
TGATGATGAGCGGATGCCGATGCCGTACGGTGCAGAAATCCAAGTTGCCGAAATGGAGGGCATGGAATAACAATGCGAC

¶15220 ¶15230 ¶15240 ¶15250 ¶15260 ¶15270 ¶15280 ¶15290  
AGATAAACTGTGTTTAAAGAGTCCAGAGCTCTTCTTGGATATGTGCTCGATATTATCAAGAAATTTGGATGAGAAGGA

¶15300 ¶15310 ¶15320 ¶15330 ¶15340 ¶15350 ¶15360 ¶15370  
GCTTAGCACTCAGGACAAGCGGAGGCGCTTCACGCAGGCCAGTGGACGTGGCCAGACAAAAAAGATGCCAGTCCCGAT

¶15380 ¶15390 ¶15400 ¶15410 ¶15420 ¶15430 ¶15440 ¶15450  
TGAGATTGGCATCGAATGCTGCATATACGGTATTTATCCACATTTCCAAATTTGAAAAGCTTAGTTTAAAGTTA

¶15460 ¶15470 ¶15480 ¶15490 ¶15500 ¶15510 ¶15520 ¶15530  
TAGGATTTGAATTCCTTCGATTTGAATTTTTGTAGTCTACTTCTAGTCTCTTTATGAACGATTTCAATCTCTG

¶15540 ¶15550 ¶15560 ¶15570 ¶15580 ¶15590 ¶15600 ¶15610  
CTAATCAGAATGTTAATTTCAAAGCTTGTGCGATTTCTTATTAGAATAGCATTAGATGTTTTGTGCGTACTCATCAAAA

¶15620 ¶15630 ¶15640 ¶15650 ¶15660 ¶15670 ¶15680 ¶15690  
TTCCCAAAATGAATTAACCAATTTCTTTTCACTTCCAAAGACTGGAACCGTGGCGATCGAACAGAAAAATCAATTTG

¶15700 ¶15710 ¶15720 ¶15730 ¶15740 ¶15750 ¶15760 ¶15770  
AACGATATTTACCCATCGATCCGGCCAAACGAATGCGATGTACGGGTGAAGATGCCGACTTGGGCAATGCGTGTTA

¶15780 ¶15790 ¶15800 ¶15810 ¶15820 ¶15830 ¶15840 ¶15850  
TTTCCATCATCACTCACCGACGACATCCAGCAAGGATACCGGGCTTGGAGGTGATACCTGGTGGGGATATTGGG

¶15860 ¶15870 ¶15880 ¶15890 ¶15900 ¶15910 ¶15920 ¶15930  
AGACCCCGGATATCTGGAGCGTGGCCGTGCTGTTGTGGGAGCTGGCCACCGGACCTATCTATTTCGATACCAATTCGAAA

¶15940 ¶15950 ¶15960 ¶15970 ¶15980 ¶15990 ¶16000 ¶16010  
AGGGGCAATAACAATCGGATGAGTCCATATAGCGAAAATCGTCAAACTGTGGTGCATACCGTGTATCTCATCCG

-----  
\*16020 \*16030 \*16040 \*16050 \*16060 \*16070 \*16080 \*16090  
CAAAGGCACAACTCGAGGAATTCATCAATAGCGCCGGCAAACTATGCAACATAGAAACCCCTGAAGCCCTTAAACTGG

-----  
\*16100 \*16110 \*16120 \*16130 \*16140 \*16150 \*16160 \*16170  
CCAATATCTTAATCAGATGGTACGGATGGAGGACTCGCCAATCCACGGAAATCGTAAATTCCTGATGCCATGCTGCAG

-----  
\*16180 \*16190 \*16200 \*16210 \*16220 \*16230 \*16240 \*16250  
ACCAATCTCTTGTCTCGCATATCCGCAAGCCCTTGGAAAGCCACTACTTATGCACACATGCTCTTCTCGCATGGA

-----  
\*16260 \*16270 \*16280 \*16290 \*16300 \*16310 \*16320 \*16330  
CATTGACAGTTACTACTATTATAGTGTACGTGAAATCAAGGACTGCACACATACCAGAGTGAAGAANTAGCAGTGGG

-----  
\*16340 \*16350 \*16360 \*16370 \*16380 \*16390 \*16400 \*16410  
ACAGCAGCAGCTGCAGTCCATAGACAGCAGCGAATTTCCAGCGACGAGGCTGTCTATGAGGACGATGTCAACGAAGAA

-----  
\*16420 \*16430 \*16440 \*16450 \*16460 \*16470 \*16480 \*16490  
GACATCAAGAAGTTATATTAACAGTGAATTTATTAGCCAAAGCACACAGCCAGTAACCCATATTAAGTAACTCATATAACCC

-----  
\*16500 \*16510 \*16520 \*16530 \*16540 \*16550 \*16560 \*16570  
ATATTAGATATTTCAAGTTATAATAAAGTGTCTCCGGAGGCCATATATACAAATTTATTTTCATGTATGTTATTTAAAAA

-----  
\*16580 \*16590 \*16600 \*16610 \*16620 \*16630 \*16640 \*16650  
CAAAGGTGAAACAAATATAGATGAGGTTATATTTGATCACTTTAACTGAAAGTCCCACTGTCCGATGAACCTCGAAT

-----  
\*16660 \*16670 \*16680 \*16690 \*16700 \*16710 \*16720 \*16730  
CTCAGGAACATAAAAGCTAGAAAGTTGAGATTAAAGCATAGAGATTTCTAGAGACATAGACCGAGTTCTTTCACACATGTT

-----  
\*16740 \*16750 \*16760 \*16770 \*16780 \*16790 \*16800 \*16810  
GCCACGCCCGCTCAACGCCCTCAATGTGTGATATTTTTCACAGTTTATTAGTCTTGTAAATTTCTATCAATTTGCA

-----  
\*16820 \*16830 \*16840 \*16850 \*16860 \*16870 \*16880 \*16890  
AAAAAAAAAAAAAAAAAAAAAAAAAATGCCACGGCAGGTTGGGCCACGCTTTTGAACAATTTTAAATTTTTCCTC

-----  
\*16900 \*16910 \*16920 \*16930 \*16940 \*16950 \*16960 \*16970  
ATCTTATTTCCCAATATCTATCGATATCCCGAAAAATGATAAATTTTCGCGTTGCGATCTCACACTAGCTAGGATATGGT

-----  
\*16980 \*16990 \*17000 \*17010 \*17020 \*17030 \*17040 \*17050  
ATCTGATAGTCGGGAACTCAATATGTTTATTGATCAATATTTTAAATATAAATAGTTAGATGGATAAATTTAAAT

-----  
\*17060 \*17070 \*17080 \*17090 \*17100 \*17110 \*17120 \*17130  
AGTTGGCAGCTTTAAGCTTTGGTATAATAAATATGTTGTAATTTAAAGATAAAACCAATATGAAATAAAACTACC

-----  
\*17140 \*17150 \*17160 \*17170 \*17180 \*17190 \*17200 \*17210  
AATTCCTTCAAGGTATATAAATTTTACTTTTATAAAAGTTTCATTTTATTCGCGTACACATGATGTCAGTAGTAAGACT

-----  
\*17220 \*17230 \*17240 \*17250 \*17260 \*17270 \*17280 \*17290  
TTTTACATTTTCGAACTGGTTAAGCCCTAGTATATAAAAGCATTGGCGCAACACAGCCGAGTTCCTCGCAATAG

-----  
\*17300 \*17310 \*17320 \*17330 \*17340 \*17350 \*17360 \*17370  
AATTCGGTATGATTGACCCCAATAATFCGCTTGTGTTCTTTTCGATGCAATAACAAGAGTCATAGAAATCGGTGA

-----  
\*17380 \*17390 \*17400 \*17410 \*17420 \*17430 \*17440 \*17450  
ACACTGACACACTCGAAGCAAATTCGCACAGGAAGTCCAGGAAAAGTCCCTTTGAGCACTTGAAGATGTCGTFGG

-----  
\*17460 \*17470 \*17480 \*17490 \*17500 \*17510 \*17520 \*17530  
AGTTTCAGTAGATCTTAGCCAGCTTCCATCTCTTTCGTTGTCACCAACATGTTGGCTTCTTCAGATTTTCGGGTA

-----  
\*17540 \*17550 \*17560 \*17570 \*17580 \*17590 \*17600 \*17610  
ATTGGTGAATCTTCGCCAGAGTTTCGTCATGGAGCAAACTACGTGTGTAGGTGTAAGTAAAGTAAAGTAAAGTAAAGT

-----  
\*17620 \*17630 \*17640 \*17650 \*17660 \*17670 \*17680 \*17690  
CGCGATCTCAAGATCTTATCGAACGAAATATATAGTTCGCTGATCCGGTTTGGACATAAATCCGAACTACTTAATGACT

-----  
\*17700 \*17710 \*17720 \*17730 \*17740 \*17750 \*17760 \*17770  
CCATATGCGACGACTTTGGGCCCTCAGTTCTGTGGCGTGGAGACTTTATCGCGGCCACGACTCTCAATTTGCTG

-----  
\*17780 \*17790 \*17800 \*17810 \*17820 \*17830 \*17840 \*17850  
CAGGATCCCTCATTTCCCTCATCCAGCAAACTCGACAGCTTAACCGTATACCCGATCGAGTCTTAACCTTTCCACT

-----  
\*17860 \*17870 \*17880 \*17890 \*17900 \*17910 \*17920 \*17930  
CCTCGCCAGAACGACCCAACTGTACGTGTCACACGATGGCTGAGTGGATTTAGATAGCAGATCGTTCGGCAGCT

-----  
\*17940 \*17950 \*17960 \*17970 \*17980 \*17990 \*18000 \*18010  
CCTCGCCAGAACCCCAAACTGAACGTGATCTACAGCATGAACGCCGATCTAGGATGCCGACAGCTTCGCCCC



¶17940 ¶17950 ¶17960 ¶17970 ¶17980 ¶17990 ¶18000 ¶18010  
TTGAAATGGTATTAAAATCGGTGCTTTGGCCGGAGTCGACCACATAGATGCCAATCGCAAAGCTCTCCCTCAAGCG  
TGAA ATGGTATT AAATG GTGCT TG CC G GTC ACCACATA AT ATCCA GCA TCCTCCGCCAA CG  
TTGAAAATGGTATTAAAATGTGTGCTTCTGTCAGCGTCCACCACATAAATAATCCAGGACGACTTTTCTCCCAATCG  
¶1610 ¶1620 ¶1630 ¶1640 ¶1650 ¶1660 ¶1670 ¶1680

¶18020 ¶18030 ¶18040 ¶18050 ¶18060 ¶18070 ¶18080 ¶18090  
ATGGCGAATGGTCCCAATGTCAGAGGTATCATAGTAAAGCCGCCATCCGATTCCAGCATGTCAGAGGTATGCCAATT  
TG CGAATGG CCAAT TCAGAGGTATC TA GT AA CC CCAATC GA TTCAGAT GT AG GG ATCC GTTT  
GTGCAATGGCAGCCATATCAGAGGTATCGTACGTGAACCACCATCGGACTTCACGATCGTTAGGGGGATGCCTGTT  
¶1690 ¶1700 ¶1710 ¶1720 ¶1730 ¶1740 ¶1750 ¶1760

¶18100 ¶18110 ¶18120 ¶18130 ¶18140 ¶18150 ¶18160 ¶18170  
TCGTATCGTTCGGCCACATGATCGCGTCTTCATCCACTCCAGCAGACCTTTGCCTCGCAAGTATCCACACACGGAC  
T T TCGTCTGGCCACAT ATCTC GTCCT TCATCC TCACGA CTT TCGCAAG A TC AC AC GAC  
TGCCTCTGCTGGCCACATATCTCAGTCTCATCCGCTCCAGCAAGTCTTCTTCCCAAGAACTCAACCCAGAC  
¶1770 ¶1780 ¶1790 ¶1800 ¶1810 ¶1820 ¶1830 ¶1840

¶18180 ¶18190 ¶18200 ¶18210 ¶18220 ¶18230 ¶18240 ¶18250  
AGCATACTGATTGGTGAAGCATTCGCCCGTTCCTTGACGCTAATATCTAATCGTTCGTAGATCGTTTGAACCTCCTT  
AGCATAC GA TGGTAGAA GATTCC CC CG TC T GA A ATC A CG T GTAGAT GTTTTGAACCTCCTT  
AGCATAAGACTGGTGAAGGATTGCCACGCTCTGGATCGACACATCGAGGCGATTGTAGATGGTTTGAACCTCCTT  
¶1850 ¶1860 ¶1870 ¶1880 ¶1890 ¶1900 ¶1910 ¶1920

¶18260 ¶18270 ¶18280 ¶18290 ¶18300 ¶18310 ¶18320 ¶18330  
TCGGCACACATGGCAATAGTCCCAAGCTTAAATGGATTCGGCACACCTTCTGCAATGAAACCACTGCAGCTGAGG  
CGGCACACAT GCAAA T CT CCA GCCTTAATGGAGT GGC C CC TGTGA CAAACACTGCAGTGA  
CCGGCACACATGGCAATCAACTCCAGCCCTTAAATGGATTCGGCTCGCCCTCTGCAAGGAAACCACTGCAGCTGAGG  
¶1930 ¶1940 ¶1950 ¶1960 ¶1970 ¶1980 ¶1990 ¶2000

¶18340 ¶18350 ¶18360 ¶18370 ¶18380 ¶18390 ¶18400 ¶18410  
CAGCTTTTGAACCTCCTCATCTCATCGAATCGCAAGGAAGTATTATTACCTCGAGCACATCGTAATACTTCGTAA  
C C T T TGAATCCCTC TC TC TCGA  
CCCTCTTCTGAACTCTCGCTCGTCTCGA  
¶2010 ¶2020 ¶2030

¶18420 ¶18430 ¶18440 ¶18450 ¶18460 ¶18470 ¶18480 ¶18490  
TGTACAAAGCTTACCGCTCTTGGATTCTTGTAGAACAAATGACGATCACTGACGGAGGCTTTCATTTAGTAGATT  
ACCGCTCTTGGAA TCCTTTAGAAA A TG AGATC C GAT GGAG CTTC TT AGG A TT  
-----ACCGCTCTTGGACTCTTGTAGAACACCTGTAGATCGCCGATGGGAGGACTTCTGCTCAGCAAAAT  
¶2040 ¶2050 ¶2060 ¶2070 ¶2080 ¶2090 ¶2100

¶18500 ¶18510 ¶18520 ¶18530 ¶18540 ¶18550 ¶18560 ¶18570  
GGGAAACGATCTTCCAAATGGGCAATCAGCATGCCAAACTGTGTCCCACTCACCAGTGGTGTAGCGGCATCAGAT  
GGGAA CGATCTTCCA TGGGC ATCAGCATGCCAAACTGTGT CCGCA TC CC AGTGTGT AGG CCGGATC A C T  
GGGAAACGATCTTCCAGTGGGCGATCAGCATGCCAAACTGTGTGCCCAATCGCCGAGTGGTAAATGGCAAGCAGCT  
¶2110 ¶2120 ¶2130 ¶2140 ¶2150 ¶2160 ¶2170 ¶2180

¶18580 ¶18590 ¶18600 ¶18610 ¶18620 ¶18630 ¶18640 ¶18650  
CGTCTCAGGAACTCCAGCAAGCGGCATAACGACTCGCCAAATGATCGTGGACCGCAAGTGCAGCAGATGATCTGTTT  
CGTCTG AG AACTCCAG A CGGCA A GA TC CAAATGAT GTGGACCGCA GTGACC AC TGCATCTG TTG  
CGTCTGAAAGAACTCCAGTAGCCGGCAAAATGATCTCCTCAATGATGTGGACCGCAGTGCAGCAGCTGATCTGCTG  
¶2190 ¶2200 ¶2210 ¶2220 ¶2230 ¶2240 ¶2250 ¶2260

¶18660 ¶18670 ¶18680 ¶18690 ¶18700 ¶18710 ¶18720 ¶18730  
GCAATGTGGGCGATGAAAAGTGCAGCAGGACTCGCTTTTGTACACTCTGGCGGCTTGACACCGTTACGCAAGATG  
GCAATGTGGGCGATGAAAAGTGCAGCAGGACTCGCTTTTGTACACTCTGGCGGCTTGACACCGTTACGCAAGATG  
GCAATGTGGGCGATGAAAAGTGCAGCAGGACTCGCTTTTGTGGAAACCGGGGTTGTTTACCGCGCTTTTAGAAGGCC  
¶2270 ¶2280 ¶2290 ¶2300 ¶2310 ¶2320 ¶2330 ¶2340

¶18740 ¶18750 ¶18760 ¶18770 ¶18780 ¶18790 ¶18800  
GCTTAGCTTAAAGCAATGATCTCCAAAATTA-ACATTTTAAAT---GTTT---AAATGGACTTTGATCTTAT  
GC ACT ACTTGT AG AA AC TT AC AA CC GCTCCGCG A TTC AGCTTTTCAAT A TGG GA CTGGG  
GCTTAA GCT GATGCATA T TCTG AAT A A TT T AT G TT ATAT AC T T TA T A  
GCTTAAAGCTTGTGATGATGTTCTGCGGGAATGAGATTCTGTGATCAGATCAATAA-ACCGTTTCTAATFAG  
¶2350 ¶2360 ¶2370 ¶2380 ¶2390 ¶2400 ¶2410

¶18810 ¶18820 ¶18830 ¶18840 ¶18850 ¶18860 ¶18870 ¶18880  
---GCCACTCACTTGCATGAAGCAACGTTTACGAAGCCAGCTCCGGCAATTTCCAGCTTTTCAATGATTTGGATGCTGGG  
GC ACT ACTTGT AG AA AC TT AC AA CC GCTCCGCG A TTC AGCTTTTCAAT A TGG GA CTGGG  
CGCAACTTACTTGTCTGAAAAGACATTAACAACCCGGCTCCGGCCACTTACTGCTTTTCAATAAGTGGCGAAACTGGG  
¶2420 ¶2430 ¶2440 ¶2450 ¶2460 ¶2470 ¶2480 ¶2490

¶18890 ¶18900 ¶18910 ¶18920 ¶18930 ¶18940 ¶18950 ¶18960  
CAGTGTCTTCACTCGGTGCAATACACGTTGGTCTTTAATAGCCCTTCTCTTCAGCTTCTTGGACATCCCAT  
T GAA TT C TC T T T T T C A G T  
CAGT---TT---CTC-----TGATTTTCAG-----T  
¶2500 ¶2510

¶18970 ¶18980 ¶18990 ¶19000 ¶19010 ¶19020 ¶19030 ¶19040  
GGCATTCTGTCATGATGTCGCGGAATTCGAGAGCTACTATTAACTGGTGAATATAACAGCGCTATCTCTGAAT  
GCAT TG  
GGCAATG-----CTT-----  
¶2520

¶19050 ¶19060 ¶19070 ¶19080 ¶19090 ¶19100 ¶19110 ¶19120  
CCGGAAAGCTGATGCAATCGCCTGGCGAAAGACGCTTTCAGGTGTTTCGGTGTATCGAAGAGGATCTCTGGGCTTCGAA  
TCGCCTGGCGA CTT  
-----CTT-----  
TCGCCTGGCGA ¶2530 ¶2540

¶19130 ¶19140 ¶19150 ¶19160 ¶19170 ¶19180 ¶19190 ¶19200  
ACGTCGCCCGCGGCGAGTTGATTCCTCAGCAATGACTAACAGGGAATAAAGACATGAAATCTTAAGCT---TAAA  
GTTGATTC T GA T C GG AA CAT ATT TT CT TA  
---GTTGATTTCTTCTGATGTTGCTGGCC---AATTTCAATCGCATTTGACAGCTGATG  
¶2550 ¶2560 ¶2570 ¶2580 ¶2590

¶19210 ¶19220 ¶19230 ¶19240 ¶19250 ¶19260 ¶19270  
CAGATTTGGGGCTAATAACTCACCTT-CTTAGGAT---AAACAGGGG-GTCTTCAGCTTCTTATTTTCAATTTGAG-  
C C C A A C C T C A G A A A A C G G T C T T C A C A T A A  
CCCAACTTTGCCAAGCGCTGTGACAGGAGCAATTGAAACGGGAGTGTCTTGTATTCCGAAAAGCTAAATGCAAT  
¶2600 ¶2610 ¶2620 ¶2630 ¶2640 ¶2650 ¶2660 ¶2670

¶19360 ¶19290 ¶19300 ¶19310 ¶19320 ¶19330 ¶19340 ¶19350  
---CTGAACAAGATCGACCTCAACTGTTACCGCTTTTGGCAGTTTGTATTCGCG-CGGCAAG---GCCTTGGGCTTCA  
CTG C A C GA T C A TG C CCG T G AG T T T CTG C C AA GCC GG TTC  
GCCTGGGCAACACGAAATGCAAGT---CTCGGTAGAT---AGCTGTTCTCTCGGACCTCAATGCTCCAGCCGGCTTTG  
¶2680 ¶2690 ¶2700 ¶2710 ¶2720 ¶2730 ¶2740 ¶2750

¶19360 ¶19370 ¶19380 ¶19390 ¶19400  
GTTCCCTTAAAGCCGGCATGATCTCAAATGTTGGCCTAAGTAACAGCTA-----  
T C C T G C T A T A A A C G T A A A T A A  
ACTCCTCGCATGGACTTTGAAT---AGAAGAGAACTGTAATAAACA---AATTTATACAGGGCTGGCATTAAACATA  
¶2760 ¶2770 ¶2780 ¶2790 ¶2800 ¶2810 ¶2820

-----TTC-----  
TTC  
CTTGTCTGAGGATGACCGCGTGTCTGAGCTTTGTGTTTTCCACTGCAAGTTTAAAGCAGTCTCATCAGTTTGGTCC  
¶2830 ¶2840 ¶2850 ¶2860 ¶2870 ¶2880 ¶2890 ¶2900

-----  
GCAGAGCCATGTTGCGCTTGTCTTGTAAATGGGCTGCAAGTCTCTGCGTTCAAGTTCTCGAAAGGCGATTTATG  
¶2910 ¶2920 ¶2930 ¶2940 ¶2950 ¶2960 ¶2970 ¶2980

-----GCTTACCAGCTCCCTGAGTTTTCAGCTCCATATTTAGCTGGACAT  
GCTTACCAGCTC GAGTTT TT AGCTC A ATT AG C CAT  
AAGATATTGGCGGAGCAAAATTCATCAAGGCTTACCAGCTCTCGAGTTTCTTACCTCAACATTCAGACC---CAT  
¶2990 ¶3000 ¶3010 ¶3020 ¶3030 ¶3040 ¶3050 ¶3060

¶19460 ¶19470 ¶19480 ¶19490 ¶19500 ¶19510 ¶19520 ¶19530  
GTTTCCAAATTTGATCTCTGTTGCTCGCTGATTAATAACAACAACACAGATGCCACATGGATGGCAAGTAGTGTGC  
TT CCA  
CTTCCCAA-----  
¶3070

¶19540 ¶19550 ¶19560 ¶19570 ¶19580 ¶19590 ¶19600 ¶19610  
ACACGCTCCATCAGATAACGATAACAGCTGTGATGTCACGCTCACAGTCTTACGATGTCGTTTTTCCAGCTGG  
TTC  
-----TTC-----  
¶19620 ¶19630 ¶19640 ¶19650 ¶19660

CAITTTAAAGATTTTCTCATTGACAGTTAAACTATGCAACAG  
TTT A GAT CAACA  
--TTTACCAGT-----CAACAA  
93080 93090

5e)

CG32712:melanogaster (above), yakuba (below)  
Martinez/Needleman-Wunsch DNA Alignment  
Minimum Match: 9; Gap Penalty: 1.10; Gap Length Penalty: 0.33

110 120 130 140 150 160 170  
AAACCAATTTGGTTCGGTAGTTCCCTTAAGAAATGCTCCACAAGTTGACTAATTTTAAAGCCACATACATC  
A CC TTTGGT GGTAGTT CCTAAGA ATGCTCCACAAGTTGACTAATTTTAAAGCCACAT CAT  
AGCCGTTTGGTTCGGTAGTTTCCCTAAGAGATGCTCCACAAGTTGACTAATTTTAAAGCCACATCATT  
91830 91840 91850 91860 91870 91880 91890  
180 190 200 210 220 230 240 250 260 270  
CAGCCACAGT---ACACCAAATCCAGCATCGTCATTGTATGAATAAGCTGCATTTAAGTCACCAAAA  
CAGCCACAC ACACCAAATCCAGCATCGTCATTGTATGAATAAGCTGCATTTAAGTC CAAAAC  
CAGCCACACACGACACCAAAATCCAGCATCGTCATTGTATGAATAAGCTGCATTTAAGTCGCCAAAAC  
91900 91910 91920 91930 91940 91950 91960  
1140 1150 1160 1170 1180 1190 1200  
ATTGTAAATAAAACTGTTTACCGCCCGCTCCGAGCGAGAATCCAGCTGAAATACCTCCGATGG-ATG  
ATTGTAAATAAAACTGTTTACCGCCCGCTCCGAGCGA AATCCAGCTG AAT CCTC ATG A G  
ATTGTAAATAAAACTGTTTACCGCCCGCTCCGAGCGAAAATCCAGCTGCAATGCCTCCAATTGTATAG  
91970 91980 91990 92000 92010 92020 92030  
210 220 230 240 250 260 270  
-GTTAAAGTGGATCCAGGTGACAGACGCGCTGCATACCCCTGTTATACATATGTTATTTCAGTGATACATTTA  
GGT A GTGGATCCAGGTGACAGAC CGCTGCATACCCCT TTATACATATGTT T CAGTGATA AT T  
TGGGACGTGGATCCAGGTGACAGACACGCTGCATACCCCTTTATACATATGTTTCCAGTGATAAATATAG  
92040 92050 92060 92070 92080 92090 92100  
280 290 300 310 320 330 340  
GTACACACTCAAATAACACGCGCAAACTA---TACTAAATTTGAGAGTCAGACATGAACCTAGTATTAT  
GTACACACT A A CCACGCAAAA TA TACT AA T GAGA TCAGACATGAACCTAGTATTAT  
GTACACACTG---ACAGCCACGCAAAAATATGCTACTTAAGTCGAGAATCAGACATGAACCTAGTATTAT  
92110 92120 92130 92140 92150 92160 92170  
350 360 370 380 390 400 410  
TTATGACATTAAGACCTTGAAGGAGTTGGCTGTTTTCGTTTAAATCCACTAACTGTAATAACTAT  
T AT ACATTAAGACCATT TGT AAATC TACT AACT TA AACT T  
TCATACATTAAGACCATT-----TGTAAATCTTACTGAACATATACTACT-T  
92180 92190 92200 92210 92220  
420 430 440 450 460 470  
ATATTAGTTAATAATCTGAGATTA-TGATATAGACATGTACTCTTAATGTTTCGA-----TATTTT  
AT A T ATCTGAGATTA T GATATA CAT TACT TA TGTT A TA TT  
GAATGATAT-----ATCTGAGATTAATGGATATACCCATTACTCATACTGTTTAAAGAAGCAATTAATTA  
92230 92240 92250 92260 92270 92280  
480 490 500 510 520  
TCAAAACGAT-----AACAAAATATGCGAGA---TAGGGAATCAGTTAAATACT  
T AA AT AA A AT T CA A T GAATC GTTAAA TACT  
TTTAAATTAATTTTGGATTTTATATCTCAAGCAATCTTCAAAACCTTTTGAATCGGTAAATTTACT  
92290 92300 92310 92320 92330 92340 92350  
530 540 550 560 570 580 590  
TCAGTTTCCGACATACGACCAATGTTTTCCTCAGTAGTC-AACTTAAATAATGAAGTAGTATCCCCCA  
T A TT T C ACTA CGACCAAT GTT TTC GTGATG AA TAAAATTA AA TAGTATCC  
TTATTTATACCACATGCGCAACATCGTCTCCTCGCTGATGAAAGTTTAAAATTTAATTAGTATCTC---  
92360 92370 92380 92390 92400 92410 92420  
600 610 620 630 640 650 660  
TAGAAATGATTTTGTAAAATATGAACCTGAAATATGTGAAATATAGTGGTCAGATGCTGAGTAAAAA  
TGATTTTTGTAAA TT ACTCTGAATATGTGAAATATAGTGGTCAGATGCT AGTAAA A  
-----TGATTTTTGTAAACTT-----ACTCTGAATATGTGAAATATAGTGGTCAGATGCTAAGTAAAAA

92430 92440 92450 92460 92470 92480  
1670 1680 1690 1700 1710 1720  
ACGTGCGCGTAG----TCCATTATTAGCTATATAGGGTAGTATGGTAGAGCAAGAGTGGGCTGCC  
A GTGCG TAG TCC TT T AGCTATA AGG GTAT G GTA CAA AAGTGGG TGCC  
AAGTGCCATAGCCTGTTCCCTTCTCAAGCTATACAGG---GTATCG--GTAATCCAAAAGTGGGTTGCC  
92490 92500 92510 92520 92530 92540 92550  
1730 1740 1750 1760 1770 1780 1790  
CACTGCAAGTTAATCTTCAGCAGACGGGAGCTTTGGCTTCGACTCGGTGGAGCACAATGTGGAAAGC  
CACTG AAG TAATCT CAGCAGA CG CAGTCT TG CTT GACTC TGGA CA ATG GAA A  
CACTGAAAGGTAATCTCCAGCAGA-CGACAGTCTATGCCTTAGACTTTTGGAAACAGGATCGCGAAAA--  
92560 92570 92580 92590 92600 92610  
1800 1810 1820 1830 1840 1850 1860  
CTGGGACTCGGTTGGGCTACTTTTCTTTGGCGCCTTCGTGAGTTCCTAGCTTCTAGTTTCTATCTCG  
-----AGTT T  
-----AGTTGATG-----  
92620  
1870 1880 1890 1900 1910 1920 1930  
CCAAGCTTAGTTTGTCCGCCATTCGAACCCAAACACAGATCTCCCTGCTTTGTGGCGCTGCACTGCTCA  
TGCT T  
-----TGCTCT-----CTTT  
92630  
1940 1950 1960 1970 1980 1990 1000  
ACAGATTTTACATCGAACTGGACGCTCCGTTGACGTGACCAATGGAGGCCGCAAGATTT  
AC AGAT A  
ACTAGATAA-----  
92640  
1010 1020 1030 1040 1050 1060 1070  
GGACGTGCGTCCATGGCACCCCTGATCGTTGGCAATCCGGATGCAGCGCATCTTAGCCGGCAGGATTA  
-----  
1080 1090 1100 1110 1120 1130 1140  
TCGTATTTCGCTGGACGGTGGTGTTCACGTGCTCTACTCTTCGCGACACGCTCCTCATCCGGGCCA  
-----  
1150 1160 1170 1180 1190 1200 1210  
AGTACTTGGCAATTTGAGATTAGCTGGCCACCTCCAGTGGTATGATGTTATGGATTAAGAACTAT  
-----  
1220 1230 1240 1250 1260 1270 1280  
TACATACTAAAATCTCCCTTTGCCAGATGATGCTGATGGGATCCCTGCTATCGGTTCTTGGTTATAGG  
TGCTCTGG  
-----TGCTCTGG-----  
92650  
1290 1300 1310 1320 1330 1340 1350  
TCACCGTGTCTCCATCAGCATGAACCACTCCGGGATCGCGGTGCAACCACTGGTGTCTACCACCT  
GA  
-----GA-----  
1360 1370 1380 1390 1400 1410 1420  
GTACTACTGCCCCGAAACCCGCCATCTCAGTGGTCTTCTCCGTGTCATTTCAGGAGCTCGG  
TTCCCTGGT CA TCC CAGGA CTG  
-----TTCCCTGGTACTCCTGCGAGAA---CTG  
92660 92670 92680  
1430 1440 1450 1460 1470 1480 1490  
CTGCATCGTTTACGCGCAGATTGAAGTACTAAGTACCGAACCTCCATAATCAAGTTTTTAAAGCAAAA  
CTGCATCGTTTACAG ATTGAA ATA TCAA AA A AA  
CTGCATCGTTTACAG-----ATTGAAA-----ATATTCAAA-----AATAGTAAA  
92690 92700 92710 92720



5E)

CG32712:melanogaster (above), erecta (below)  
Martinez/Needleman-Wunsch DNA Alignment  
Minimum Match: 9; Gap Penalty: 1.10; Gap Length Penalty: 0.33

```

      *20  *30  *40  *50  *60  *70
GTTGCGGTAGTTCCCTAAGAATGC---TCCACAAGTTGACTAATTTAAAGCCACATACATCCAGCCAC
GTTGCGGTAGTTCCCTAAGAATGC  TCCA  TTGACTAATTTTAA  GCCACAT  CATCCAGCCAC
GTTGCGGTAGTTCCCTAAGAATGC90AAATCCAAATTGACTAATTTTAAAGCCACATGCATCCAGCCAC970

      *80  *90  *100  *110  *120  *130  *140
ACGTACACCAAAATCCACGCATCGTCATTGTATGAATAAGCTGCATTTAAGTCAACCAAAACATTTGTAAAA
AC  TACAC  AAATCCACGCATCGTCATTGTATGAATAAGCTGCATTTAAGTCAACCAAAACATTTGTAAAA
AC-TACACAAAATCCACGCATCGTCATTGTATGAATAAGCTGCATTTAAGTCAACCAAAACATTTGTAAAA
      *80  *90  *100  *110  *120  *130
      *150  *160  *170  *180  *190  *200  *210
TAAAATGTTTACCGCCGCTCCGAGCGAGAATCCAGCTGAAATACCTCCGATTGCATGGTAAAGTGGGA
TAAAATGTTTACCGC  TCCGAGCGA  AATCCAGCTG  AAT  CCTCC  ATTGCATGGGT  AAGTGGGA
TAAAATGTTTACCGC---TCCGAGCGAAAATCCAGCTGCAATGCCTCAATTGCATGGGTAAAGTGGGA
*140  *150  *160  *170  *180  *190  *200

      *220  *230  *240  *250  *260  *270  *280
TCCAGGTGACAGACGCGCTGCATACCTGTTAATACTATGTTATTTCAGTGATACATTTAGTACACACACT
TC  AGGTGACAGAC  CGCTGCATACCTGTTAATACTATGTT  TTCAGT  A  A  ACA  AC
TCTAGGTGACAGACAGCTGCATACCTGTTAATACTATGTTTTCAGTCA---AAACAGAC--
      *210  *220  *230  *240  *250  *260

      *290  *300  *310  *320  *330  *340  *350
AAATAACACGCACAACACT---ATACTAAATTTGAGAGTCAGACATGAACAGTATTTT-ATGACATTA
  A  CCAAGCACAAA  T  ATACT  AA  T  GAGA  TCAGACATGAACAGTATTTT  AT  ACATTA
---AGCCACGCACAATAAGTACTTAAGTCGAGAATCAGACATGAACAGTATTTTATATACATTA
      *270  *280  *290  *300  *310  *320

      *360  *370  *380  *390  *400  *410  *420
AGACCAATGAAAGGAGTTGGCTGTTTTGTTTAAATCCTACTAAACTGTAACATATATATAGTATTA
AGA  CATTG  AAGGAGTGG  CTGTTTTGTT  AAATC  T  CT  AA  TGTAAACT  T  AT  A  T
AGAGCAATGGAAGGAGTTGACTGTTTTGTTA---AAATCTTCTGAATGTAAACT-TGAATGATAT--
*330  *340  *350  *360  *370  *380  *390

      *430  *440  *450  *460  *470  *480
ATAATCTGAGATTATGATATAGACATGACTCTTAATCTTTCGATATTTTCAAAACGATACAA----
  ATCTGAGATTAT  GATAT  ATGACTC  TA  TGTTT  AT  TT  TT  AAAA  A  A  CAA
---ATCTGAGATTATGATAT---ATGTACTCATACTGTTTAAATGTTGTTTAAAACAAAGCACCTT
      *400  *410  *420  *430  *440  *450

      *490  *500  *510  *520  *530  *540  *550
--AAT----ATTGCAGATAGG--GAATCAGTTAAATACTTCAGTTTTCCGACTAACGACCAATGTTTTT
  A  T  A  A  AT  G  GAATCAGTTAAATACTT  TT  TCCGACTAACGACCAAT  GTT  T
TCAATGTCACCAAAACATTTGTCGAAATCAGTTAAATACTT---TTATCCGACTAACGACCAATCGTCTC
*460  *470  *480  *490  *500  *510  *520

      *560  *570  *580  *590  *600  *610  *620
TCCAGTGAATCTAAAAAATGAAGTAGTATCCCCCATAGAAATGATTTTTGTAAAAATATGAACCTCG
TC  AGTATGAATCT  AAAT  A  TAG  ATC  TGATTTTTGTAAA  CT  TG
TCGAGTGAATCTGAAATTTTATAGCATCTT-----TGATTTTTGTAAA-----CTTGG
      *530  *540  *550  *560  *570

      *630  *640  *650  *660  *670  *680  *690
AATATGTCGAATATAGTCTCAGATGCTGAGTAAAAAACCTGCCGTAGTCCATTA-TTTCGCTATATAG
AATATGTCGAATATAGTGGTCCAGATGC  AGTAAA  AA  GTCCGCTAG  CATTAT  AGCTATA  AG
AATATGTCGAATATAGTGGTCCAGATGCAAAAGTAAAGAAATGCCGTAGCCCACTTACCTCAGCTATAAAG
      *580  *590  *600  *610  *620  *630  *640

      *700  *710  *720  *730  *740  *750  *760

```

```

GGTAGTATGTTAGTAGAGCAAGAAGTGGGCTGCCACTGCAAGTTAATCTTTCAGCAGACCGGCAGCTTT
GGTA      AGTAGAGC  AGAAGTGGG
GGTATC-----AGTAGAGCGAGAAGTGGG-----
      *650      *660      *670

      *770  *780  *790  *800  *810  *820  *830
GGCTTGCAGCTCGGTGGAGCAAAATGTTGGAAGAGCTGGGACTCGGTTGGGGTCTACTTCTCTGGGGCC
      G  GCC
-----GTGCC
-----

      *840  *850  *860  *870  *880  *890  *900
TTCGTGAGTTCCTAGTCTTCTAGTTTCTATTCCTGCCAAGCTAGTTTGTCTCCGCCATTCGAACCAAAAC
TTCGTGA  TTC      CT  TTCTGCC  A      GCTC  GCC
TTCGTGAATTC-----CTGTCTCTGCCCA-----GCTCTGCCG-----
      *680      *690      *700

      *910  *920  *930  *940  *950  *960  *970
CAGATCTCTGCTTTGTGGCGCTGCACATGCTCAACAGATTATTCACATCGAATCGGACCTCCGTTG
AGAT      TCAA
-AGAT-----TCAA-----
      *970

      *980  *990  *1000  *1010  *1020  *1030  *1040
ACGTGACCATGCAATTTGAGGCCGACAAAAGTTTGGACGTACGCTGCCATGGCACCTGATCGTTGGCAA
      AAA  A  TTG
-----AATAGTTG-----AA
      *970

      *1050  *1060  *1070  *1080  *1090  *1100  *1110
TCCGGATCGACGCATCTTAGCCGGCAGGAGTTATCGTATTTGGCGTGGAGGGTGTTCAGCTGCTC
T
TA-----
      *730

      *1120  *1130  *1140  *1150  *1160  *1170  *1180
TACTCTCTCGCGACACGCTCCTCATCCGGCCAAAGTACTTGGCAATTTTGAGATTAGCTGGCCACT

      *1190  *1200  *1210  *1220  *1230  *1240  *1250
CCAATCGGTAGATGTTATGGATATGAAAAGCATTTTACATATAAAATCTCCCTTTGCCAGATGATCGG

-----

      *1260  *1270  *1280  *1290  *1300  *1310  *1320
ATGGGATCCCTGCTATCGGTCTCTGGTATGGTCAACCGTTGCTCTCCATCAGCATGAACCATCCCGG

-----

      *1330  *1340  *1350  *1360  *1370  *1380  *1390
ATCTGCGGTGCAACCAGTTGGTGTCTACCACTGTACTACATCGCCCTGAACCCGCCATCTCAGTGGT

-----

      *1400  *1410  *1420  *1430  *1440  *1450  *1460
GTTCTCTCGGTCCATTCCATTGAGGAGCTGCTGCTGATCGTTTACAGCCGACATTGAAGTACTAAATA

-----

      *1470  *1480  *1490  *1500  *1510  *1520  *1530
CGAACCTCCATAATCAAGTTTTAAGAACAACAAAAAACCACCAATCGATATATGACGCTCTCCCTC
CGAACCTCCA  AAT  AAGGTTT  AG      AA  AACCCA      TTC  T  C
-CGAACCTCCAAAATTAAGTTTTGGAG-----AAGAACCCAT-----TTCGT-C
      *740      *750      *770

      *1540  *1550  *1560  *1570  *1580  *1590  *1600
ACATCGAATCAATAAAAAAATGCCG-TAGAATTTTATGTAATTTTATTCAACAATTTGCTTT

```



5g)

CG3712:melanogaster (above), ananasae (below)  
Martinez/Needleman-Wunsch DNA Alignment  
Minimum Match: 9; Gap Penalty: 1.10; Gap Length Penalty: 0.33

```

1180 1190 11200 11210 11220 11230 11240
GCCGCGTGTCTTCTCTCTGTAACAGTGTGTATGCAATTTT-GT--TGTTTCATGTCTAAAAGTGA
CGCCGCGTGTCT C T A A C T TGTGTATGCAATTTT GT TGTTTTCA G C TAAAAGTGA
GCCGCGTGTCTCTC-----CTGAGACATTTGTATGCAATTTTGTGTGTTCAGGCGCTAAAAGTGA
          110          120          130          140          150          160

11250 11260 11270 11280 11290 11300 11310
AGTTCACCTAGATAAGAGGAGTGAAGTCTGAGACTCCGACGTAATAATTTATCCGTTGGACCCCGTTTCGT
AGTT CCACTGATAAG G A T AC GAG CCGA GT T A C T GT TT G
AGTTTCCACTGATAACAG--ACTCCACAGAG---CCGAGGTTG--TCGAGCTTTCGT-----TTGGGA
          170          180          190          200          210          220

11320 11330 11340 11350 11360 11370 11380
GTGAGCCAGGCGAGAGGCGAGGCGTTTGGACAGCGCCCAACT--GAAACAGCCGTTCTGCATCTGCATCT
GTCA C AG GA AG CAGC G A CAGC C ACT GAAA GCC A T TT
GTCA--CAAGCGGAGAGAGCAGCA---GCAGCAGCAACAGACTGAAAAGCGCCAAAGAAAAGTTGGTT
          130          140          150          160          170          180

11390 11400 11410 11420 11430 11440
CCAAAGGCGGCCGACACA--TGGAGCGCAG--GGTCAAAGC--CGCGCCGAGAAAAC--CAAACCAAGATA
AAA G CG G A A TGGAG GCA G TCAAAG C C CCAGAAA C A CA GA
GGAAGATCGAGGAAAACCTGGAGGGCATAAGTTCAAAGAAACACTCCGAAACCTGACGCACACATGAAT
          190          200          210          220          230          240          250

          11450 11460 11470 11480 11490
G-----CACCCCGATGAGCGGGCATCGAGGAG-----TGGCGCGGAGGT-
  CA CC TG C G AT G G AG TGG CG GG
GATTTTGAAGGCATTTGATTCATCCCGTTTGTCTCAGAGATAGCCGCAATGCTGGTCCGCTGGGCA
          260          270          280          290          300          310          320

-----CTAACCTCAA-----GCACAAGCACAATCCG--CAGCATC
          1500          1510          1520
CTAACCTCAA GCACAA CAATCCG CA T
CCCAACTGGGCATCATTCGGGAGGCGCTCAACTCAAACCGAAGCGACAATCCAATCCGGCACAAGTG
          330          340          350          360          370          380          390

11530 11540 11550 11560 11570 11580
AGCACACAAAGTAACTCTG--CTAATC-----ACRCAATCCCTATCTCATTCGAGATTTTC--ACAG-
A CA AAGC A C TT C ATTC AC CCAATCCC CG TCCG A C A AG
ATATCA--AAGCAACGFTCCCAATTCCTCACTCACTCCATCCCGCCCTCCGCTCCGCCACCACTAAAGT
          400          410          420          430          440          450          460

11590 11600 11610 11620 11630 11640 11650
GATCCAAAG--CGTAGTATCATAGCCCGAGGATGCAAGCGGCTCATCGCGGCTCTTGGAGCAGCGGGGG
G TCCAAG G G GT A CA CG AGGATGACGGC C ATGCG GC CTTGGA CAG GG GGC
GTTCCAAAGTGAAGTGACCA-----CGAAGGATGACGGCCTATATGCCCCCACTGGACCAAGTGGTC
          470          480          490          500          510          520          530

11660 11670 11680 11690 11700 11710 11720
AGCCTGCTCCGCTTTTCGCGTTTCCACACCACAAAGGTGAGCCTAGCTAATTAAGTACCCAGAACTTC
GCCT CTGCCCTTTCCG T TCCACACCACCAAAAGGT GCCTAG TA AC CA A C T
GGCCTCTCGCCCTTTTCGATCTCCACACCACAAAGGTAGGCGCTAGATAG-----ACTCATATCCTAG
          540          550          560          570          580          590

11730 11740 11750 11760 11770 11780 11790
ACGAACACCTCCAAATCCCAAC---CAGTGTGTCTTCTCACTAGCCCGCGGCTGGCTTCAATGA
AC A C C CTC AA CCOC C CAGTGTG TCTCTC CT ACCGC GG FTGGCCCT ATG
ACCTAGC--CACTCTAATCCCCCTCTTTCAGGTTGTCTTCTCTCCGCTAACCCGCTGGAFTGGCCCTGATG
          600          610          620          630          640          650          660

11800 11810 11820 11830 11840 11850 11860
GCCTACTCTCCCGATTTCTGCGAGCTGCAAGCCACCGCGTCCGCTCTGTCGAGCCAGGAAGTACACGGG
GGT CTCTC CG TT CTGG CGTG AAGC CCGCTCC CC CG CG CCGAGGAAGT A C
GGCTGCTCTCGGCTTCTCTGCGCGTGGGAAGCCGCGCGTCCACCGCGCGGGCCAGGAATATACAGG

```

```

          670          680          690          700          710          720          730

11870 11880 11890 11900 11910 11920 11930
TCGGCGCAACCGCAACAGCATGCGCAGTCCAAACGATCTAATCTCGATAGCCGGATCTAAGGCCCTGGCC
CG CGCA CCGCAACAGCATGCGCAGTCC AACGATCT AT TC ATAGCCGG TC AAGCCCTGGCC
ACGTGCAACCCGCAACAGCATGCGCAGTCCCAACGATCTGATATCCATAGCCGGTCCAAGGCCCTGGCC
          740          750          760          770          780          790          800

11940 11950 11960 11970 11980 11990 12000
AGATCGGGGAGTCTGTGGGCTCCACACTGGCCTACTCGGATCGCCTGTCCATGGCTCCGGCTCGATTG
AGATC GG AG CC GT GGCTCCAC T GCCT CTC GATCGCCTGTCCATGGCCTC GG TCGATTG
AGATCGGGCAGCCAGTCCGCTCCACGATAGCCTTCCGATCGCCTGTCCATGGCTCCGGTTCGATTG
          810          820          830          840          850          860          870

12010 12020 12030 12040 12050 12060 12070
CGGTTGGTGTATTGGGCGTACAAAATGCCGGTCTGGCAGCTCGGTAGTACACAACTGACGGCCCAACA
G G GGGT TG GT CA AATCG GG TGCA TC GT GT A CACTGAGGCCA CA
GAGCGGTGCTCTG---GTTCCAGATGCTGG---TGGCACGTCCTGGTGTATCCAATGACGGCCAGCA
          880          890          900          910          920          930

12080 12090 12100 12110 12120 12130 12140
GTTGGCATGATGGGCATGGAGGCACTGGACACAGTGAATCACTTCTGGGAGGATGCCCTGGCCGACAC
TGGC T ATGGGCATGGAGCACT GACAC GTGATCACTTCTGGGA GA GCCCTGGCGCACAC
ACTGGGCGTTATGGGCATGGAGGCACTGACACAGTGTATCACTTCTGGGAAGAGCCCTGGCGGACAC
          940          950          960          970          980          990          1000

12150 12160 12170 12180 12190 12200 12210
TACTGCCCGCGGTTTGGCCCGCTGTTGACACGGCGGAGGACTCCGAGTCTCTGTCGGAATCCAAA
TA TC CCGCGCG TGCCCGCCCTG TGACCAC GC GAGGACTC GAGTCTCT GCGCA ATCCA A
TATTCAACCGCGGAGTCCCGCCCTGCTGACCACTGCCGAGGACTGGAGTTTCCGCGGAAATCCAGA
          1010          1020          1030          1040          1050          1060          1070

12220 12230 12240 12250 12260 12270 12280
ACCTGCTGGAGATGGCCTACACCGCTGCAGGAGCAGAGCGAATGCTCTTCTGACCAACGATCGGTGCT
ACCTCTGGAGATGGCCTACACCGCTGCAGGAGGAGCGA CTGCT TTCTT GACACAGC TCGGTGCT
ACCTGCTGGAGATGGCCTACACCGCTGCAGGAGCAGAGCGAGTCTGCTTCTTCCGACCACTGCTGGTGT
          1080          1090          1100          1110          1120          1130          1140

12290 12300 12310 12320 12330 12340 12350
GTTCCGCGAGGAGCATTCATTGACGAGGCGGAGGAGGAGGCGGGCGAGGCGGATGACGATCGGGCGTCA
GTTCCGCGAGGAGCATTCATTGACGAGGCGGAGGAGGAGGCG G C A C GA GACGATCGGGCGTCA
GTTCCGCGAGGAGCATTCATTGACGAGGCGGAGGAGGAGGCGGCCAACACGAGCAGACGATCGGGCGTGG
          1150          1160          1170          1180          1190          1200          1210

12360 12370 12380 12390 12400 12410 12420
CGCAAACTGGCGAGCGTTCCTAGTCCGGTGGTTCCGATCCGAACCTTGAATCCGCGGAAAGCTTTGCTT
G AAATCGGCGAG GT T AG CG GCTGGTCCGAT AA AT GATTC GC GA AGCTT GC T
AGAAAATCGGCGAGTCTTGGCCGAGTGGTTCCGATCCAAATTTGATTCGCGCGAGAGCTTCGCTG
          1220          1230          1240          1250          1260          1270          1280

12430 12440 12450 12460 12470 12480 12490
CCGCTCTGACCAAGTGGCGGATCTGCGTGAAGTTCGATGGCTTTATTGAGACTCGTAGAAGAGATATCC
CCGC CT GACCAAGTGGC GATCTGCG GAGTTCGA GGCTT AT GAGAC TCGTAGCA GAGTATCC
CCGCTTGGACAGTGGCCGATCTGCGGAGTTCGAGGCTTCATGAGACTCGTAGAAGAGATATCC
          1290          1300          1310          1320          1330          1340          1350

12500 12510 12520 12530 12540 12550 12560
GCTATTCCAGATGCACTGAAGCATCAGATGATACACGGTCCGCTGCTGATCACTTCCGCGGAGTGG
GCT TTCCAGAG GC CT AAGCATCA GATGATACACGGTCCGCTG CG ACCAATCGGGCGA TTG
GCTCTTCCAGAGCCCTCAAGCATCATGATGATACACGGTCCGCTCCGCGCACCACTTCCGCGGAGCTTG
          1360          1370          1380          1390          1400          1410          1420

12570 12580 12590 12600 12610 12620 12630
ATGCACTGCAGCAGCAGTACCGAATACCTGGCCAGCTGCACTGCGTTCGGTTCGCTTTCAGTTCCTCT
ATGCACTGC CA GATAC GA TA CTGG AACGTGCATCCGCT CG TGGCCT CAFTT CT T
ATGCACTGCAGCAGCAGTACCGAATATCTGGCGAAGCTGCACTGCGTCCGACTGCGCTTCCAGTTCCTG
          1430          1440          1450          1460          1470          1480          1490

12640 12650 12660 12670 12680 12690 12700
TCAAGGATCCGCTGTGGCCAGTGGATCTGGATGCTGGTGGCGAGATTTCAACCGATCTGCTTTGCT
TCAAGG CCGCG GT GGCCAGTGGATTCGCGATGC GG GGA AT CTCAC GA CTGT T CT
TCAAGGACCCCGCTGGCCAGTGGATTCGCGATGCGGCGGCAAACTACTACGACCTGCTATGCT
          1500          1510          1520          1530          1540          1550          1560

```

\*2710 \*2720 \*2730 \*2740 \*2750 \*2760 \*2770  
GGCGATAAGGATACCAAGGAGTTCTTGGGGTACGAGGACATGGTGAACATCTGCACGATAGCAAC  
GGCGA AAGGA ACCAAGGAGTT CT GTGGGCTACGAGGACATGTGT AA TATCTGCACGA CAAC  
CGCGCAAAGGACACCAAGGAGTTCTTGGGGTACGAGGACATGGTGAACATCTGCACGATCCAC  
\*1570 \*1580 \*1590 \*1600 \*1610 \*1620 \*1630

\*2780 \*2790 \*2800 \*2810 \*2820 \*2830 \*2840  
AACTGCCCTGCATCCAAATGGAGCTGGAGCAGCGCAATGTCAAGGCGATGACCTTCTAGCATATCTGTT  
AACTGCCCTGCATCCA TGGAGCTGGAGCAGCGCAA GTCAAGGC ATGAC TTCTACGA ATCTGT  
AACTGCCCTGCATCCAGCTGGAGCTGGAGCAGCGCAACGTCAAGGCGATGACCTTCTAGCATATCTGTT  
\*1640 \*1650 \*1660 \*1670 \*1680 \*1690 \*1700

\*2850 \*2860 \*2870 \*2880 \*2890 \*2900 \*2910  
TGGACTTCATTATCTCGATTCCGTTCAAGGATCTTGTATGCTCCGCGCTGCCAGCGTAAACAGCGGTTGTCCA  
TGGACTT ATTATCTT GATTCGGTCAAGGATCT GATGCTCCGCG GCCAG GT AC GC GT CT CA  
TGGACTTATTATCTCGATTCCGTTCAAGGATCTGATGCTCCGCGCGCAATCTTACGGCGTGTCCA  
\*1710 \*1720 \*1730 \*1740 \*1750 \*1760 \*1770

\*2920 \*2930 \*2940 \*2950 \*2960  
AAATCGCTGGCTATCCAACGGATTCAAAGAGACGGTAGTGG---TAAACT--TAG-CTTTAG-----G  
AATCG TGGCT TCCAA GGATTCAA GAGACGGTAGT TA ACT TAG C T AG G  
GAATCGATGGCTGCCAATGGATTCAAGGAGACGGTAGTCTTATAGACTTCTAGACCTCAGACTTGTG  
\*1780 \*1790 \*1800 \*1810 \*1820 \*1830 \*1840

\*2970 \*2980 \*2990 \*3000  
TCTAGG---CAAATGTTAAG-----CCCTATGTT-----CTTTG-----  
TC GG CAA TGT AA C CT TGGT CTTTGG  
TCACGGTCGCCAGTTTGTATCAAATGTTGAACACCTGTCCCTCTCTGGTACTACTTTTGTATGAA  
\*1850 \*1860 \*1870 \*1880 \*1890 \*1900 \*1910

\*3010 \*3020 \*3030  
-----ATTCC-----AGGCATTAACAACAGCCGTGTGGTCGGTCT  
ATTTC AGGC T AC AC GC GTGTGGTCGGT CT  
ATTTATAATCTAACAGCTGATTGACTTTCATTCACATAGGCCCTGGACACCCCGGGTGGTGGTACT  
\*1920 \*1930 \*1940 \*1950 \*1960 \*1970 \*1980

\*3040 \*3050 \*3060 \*3070 \*3080 \*3090 \*3100  
GAAGCAAGAAACGGATGCTTAAGTTCCCAACGGGTTTCATCTCCACTTTTACGTGATATCGAGCAG  
GAA GC AAGAA CGGATGT AAGTTCCCAACGG TCACTGTC CACTT TA GT ATATC GA GAC  
GAAGCCAAAGAGCGGATGCTCAAGTTCCCAACGGGTTTCATCTCCACTTCTATGTAATATCGGACAG  
\*1990 \*2000 \*2010 \*2020 \*2030 \*2040 \*2050

\*3110 \*3120 \*3130 \*3140 \*3150 \*3160 \*3170  
ATATCACCCTAATGGCCTGGGCTTCTTTGGACCAACGAGAACTTCCGCGACATCTGCCACTACTTCC  
ATATCACCCT ATGGCCTGGG TCTTTGGACC AACGAGAA TG G A AT TG CACTA TT  
ATATCACCCTGATGGCCTGGGACTTCTTTGGACCAACGAGAACTTGAAGGATATATGTCACTATTTTA  
\*2060 \*2070 \*2080 \*2090 \*2100 \*2110 \*2120

\*3180 \*3190 \*3200 \*3210 \*3220 \*3230 \*3240  
GAGAGAGCTGTGCTGGCTTTCTGGGCGACATCTTTAGCTTCCAAAGAGCCGCTTCCAGACCATCGAGGA  
G GAG A TGCT GCCTT CT GG GACAT TT AG TTCA AAGAGCCGCTTCC ACCATCGAGGA  
GGAGCAATTTGCTGGCTTCTTGGGACATATTCAGTTTCCAGAAAGCCGCTTCCACCACATCGAGGA  
\*2130 \*2140 \*2150 \*2160 \*2170 \*2180 \*2190

\*3250 \*3260 \*3270 \*3280 \*3290 \*3300 \*3310  
ATTCTGCAAGGATGTGTCGAGCACATGACAGCGCGTCAACAACATTTGGCGTGAATTTAGCCA----  
TTTCTC CAGGA GT CT CAGCACATGACAGCGG GTCAACA AATTGGCGT AAATTTAGCCA  
GTTCTCCAGACCTCTCCAGCACATGACAGCGGTCAACAATTTGGCGTGAATTTAGCCAATAG  
\*2200 \*2210 \*2220 \*2230 \*2240 \*2250 \*2260

\*3320 \*3330 \*3340 \*3350 \*3360  
-----GTAC-----TGGCTTCACTT-----TAGCTAGCTCTATCCATAC--TTCTTGGAC  
TAA T CG T ACT T CTAG C TC T AT TT TGG  
AGTTTATAAATACTATATTTTACGATTACTACGATCCCTCCAGACATCCGTATATGTTTAAATGTT  
\*2270 \*2280 \*2290 \*2300 \*2310 \*2320 \*2330

\*3370 \*3380 \*3390 \*3400 \*3410  
TCCCTCTCATAT-----ATTTTTCACAAAA-----CAATTTGGTTCGGTAGTTCCCTAAGAA  
T CC T C A T A TTTT CA A C ATTTG TT GAGTATTCCTCAAGA  
TACATCCCAACTAACCCACTTTTGTCACTATTAGACTGTCTAATTTGATTTGGTATTTCCCTAAGAG  
\*2340 \*2350 \*2360 \*2370 \*2380 \*2390 \*2400

\*3420 \*3430 \*3440 \*3450 \*3460 \*3470 \*3480  
ATGTCCTCAAGTTGACTAATTTTAAAGCCACATACATCCAGCCACAGCTACACAAATCCAGCGATCGT  
AT TCCACAAAGTTGACTAATT TAA CCA TACA CCA A CCA T T  
ATCTCTCAAGTTGACTAATCTTAAATACCAATTACAC-----CCACAACACTCGTT--T  
\*2410 \*2420 \*2430 \*2440 \*2450 \*2460

\*3490 \*3500 \*3510 \*3520 \*3530  
CATTTGT-ATGATAAGCTGCATTTAACTGACC-----AAAACTTTGTAATATAAAA  
CATTTGT ATGA TAAGCTGCATTAAG C CC AAAAACTTTGTAATATAAAA  
CATTTGTAATGATAAGCTGCATTTAAAGCCCAAAAAAGAAAAAAATGAAAAAATTTGTAATATAAAA  
\*2470 \*2480 \*2490 \*2500 \*2510 \*2520 \*2530

\*3540 \*3550 \*3560 \*3570 \*3580 \*3590 \*3600  
CTGTTTACCOCGCTCCGAGCGAGAATCCAGCTGAAATACCTCCGATTGCATGGTAAAGTGATCCAG  
CTGTTTACCG CG TCCGA C A AATCCAGCTG  
CTGTTTACCAGGATCCGATCTAAAATCAGCTG-----  
\*2540 \*2550 \*2560

\*3610 \*3620 \*3630 \*3640 \*3650 \*3660 \*3670  
GTGACAGACCGCTGCATACCCGTGTATACATGTTATTTCAGTGATACATTTAGTACACACACTCAAATA  
CTA G ATT AGT G AT CT AAA  
-----CTA-GAAATTTGAGTGGCA-AT-----CTGAAGC  
\*2570 \*2580 \*2590

\*3680 \*3690 \*3700 \*3710 \*3720 \*3730 \*3740  
ACCAGCACAACTATACTAAATTTGAGAGTACAGACTGAACTAGTATTTTATGACATTAAGACCATGTG  
AATT G AGTC GAC T  
-----AATGGGTAGTC-----GACGCATC  
\*2600 \*2610

\*3750 \*3760 \*3770 \*3780 \*3790 \*3800 \*3810  
AAAGGAGTTGGCTGTTTTGTTGTTTAAATCTACTAAACTGTAAAATATATATAGTTTAAATATCTGA  
AA A CCT CTA AC  
AA-----ATACCTTCTATAC-----  
\*2620 \*2630

\*3820 \*3830 \*3840 \*3850 \*3860 \*3870 \*3880  
GATTTATGATATGACATGTACTCTTAATGTTTCGATATTTTTCAAACGATAACAAAATATGACAGATA  
-----

\*3890 \*3900 \*3910 \*3920 \*3930 \*3940 \*3950  
GGGAATCAGTTAAATACCTTCA-----GTTTCCGACTAACGAC--CAATTTGTTTTTCCAGTGAAGTAA  
AAATACTTCA G TTT AC AA AC CA TTTT A T T AAT  
-----AAATACTTCAATGATTTAGTACAAAAACTACACAAGAAATTCAAATT--TTAATA  
\*2640 \*2650 \*2660 \*2670 \*2680

\*3960 \*3970 \*3980 \*3990 \*4000 \*4010  
TAAAAATGGA-AGTAG-TATCCCCATAGAAATGATTTTTGTAAAAATTA-----TGAACTCTGAAATATG  
T ATT A A T G TAT C CA A AT T TT G AAA T TGA A T ATTA  
TTTCTAATTAATTTTATGATTTCTCAAATTTAT-TGTTCCGAAAAAGTTTTGCGTAAAAAATTCATTAAT  
\*2690 \*2700 \*2710 \*2720 \*2730 \*2740 \*2750

\*4020 \*4030 \*4040 \*4050 \*4060 \*4070  
TGAATA---TAGTGGTCAGATGCTGAGTAAAAACGTCGCCGA-GTCCATTTATTAGC---TATATAGG  
TGA TA T T T TG T A T AAA C T TA GT CA T C T C T AT G  
GATTTATTTTATTTTTTTTTTTGTTCA-TGAATGCTTAAAAATGTCACAAAAAAGACATTTGATTTG  
\*2760 \*2770 \*2780 \*2790 \*2800 \*2810 \*2820

\*4080 \*4090 \*4100 \*4110 \*4120 \*4130 \*4140  
GTAGTATGGTAGAGCAAGAAGTGGGCTGCCACTGCAAG--TTAATCTTCCAGACCGCGAGTCTT  
T GTA TA T AGC A AA T G TG A TG TT AT T A CA A GG A T  
TTTGTAAACTATTTAGCGA-AAATAAGTTGAA-ATTGTTGCTTTTATGTAACAATAAGGAAATC  
\*2830 \*2840 \*2850 \*2860 \*2870 \*2880 \*2890

\*4150 \*4160 \*4170 \*4180 \*4190 \*4200  
TGGCTTCGACTCGGTGGAGCACAATGTTG--AAGAGCCTGGGACTCGGTTGCGGCTACTTT---CTCT  
AG A AATG AA A CTG GGT C T T T T CTCT  
-----AAG-AAAAATAAATAAATCTGACCAATGTTACTTTTTTAAATGAACTCT  
\*2900 \*2910 \*2920 \*2930 \*2940

\*4210 \*4220 \*4230 \*4240 \*4250 \*4260 \*4270

TGGC-GCCTTCGTGAGTTCCTAGCTTCTAGTTTCTATTCTCGCCAGCT-TAGTTTGTCCGCCATTGCA  
GGC G C TGAGTT C CTT A T T TAT T A T TAG T G C A C  
AGGCTGTAGACTTGAGTTTC---CTTGAATATATATATATATATATATATAGGTGATAATGACAAACCG  
92950 92960 92970 92980 92990 93000 93010

C GC  
GTGTACATGTACTTCATTGSCCTGACCACCGGAGTGGCGGTGGCCCTCTTCCTGAGCCACTCCTGCCACC  
93770 93780 93790 93800 93810 93820 93830

14280 14290 14300 14310 14320 14330 14340  
ACCCAAACACAG---ATCTCCCTGGTTTGGCGCTGCACACGCTCAACGAGAT-TATTGCACATCGAAGT  
A A G A CCTG TG C C G A G T A CAGA TA CA A  
AGTGGAGTTTGGAGTAATGCTGGCATGCCACCGTATAGGTT--ATCAGAGTAAACGAAATGGTT  
93020 93030 93040 93050 93060 93070 93080

14830  
-----CGACATGA-----A  
AGCATCGCTCCAGGTGAGCGGTGACGAGTGGGTATCGCAATTTAGCGCGGATAATTTAAAAACGATA  
93840 93850 93860 93870 93880 93890 93900

14350 14360 14370 14380 14390 14400 14410  
GACCGCTCCGTTGACCTGACCATGCAATGGAGCCGCAAAAGATTTGGACGCTACCGTGGCCATGGACCC  
AC C CCGT ACG A TG TGG GGC A GA GA G C G C TGG  
AACTTCCCGCTCAACGACAGT-TGTTTCTGGCGGCTCAGTG-GAGCAAGATGGCAAGGCGCTGGG----

14840 14850 14860 14870  
GACT-----AAGTACC-GA-ACCTCCATA-----TCAAGTTTTAAAGAA  
G ACT AAG ACC GA A CTC TAA TC A TTAA  
GCATTTTCCCAAGCGAAGGATATGCAAGGACCTGATAGCTCCCTAATTCCTTCCAAAATTTAAAT  
93910 93920 93930 93940 93950 93960 93970

14420  
-----TGAT-----CGT  
TGA C T  
CCTCAGCTGTGCAATCTTAGCACTCGGTGCCTTTGTGAGTAAGTCCGCCACCCATGGAGCCTAGATCTCT  
93150 93160 93170 93180 93190 93200 93210

14880 14890 14900 14910  
---CAAA-----AAAAAAAACC-----CAATCGATAT-ATGCMCTTCC-----  
CAAA AAAAAAAAAC CAA C A AT A C TT C  
CTTCAAATTTAAACCCCTATCTAAAAAAAACAATCTTCAACAAAATGAACCTAATACCAATTT  
93980 93990 94000 94010 94020 94030 94040

14430 14440 14450  
TGGCAATC-----CGGA-----TGCAGC-----GCAT-----CTTAGCG-----GC  
TGGC A C C G A TGC C GCAT CTTA CC GC  
TGGCTAACGAGTCTGTGACACACAGATAGCCTGCTTGGGGCCCTGCATCTCCTTAACAGATCGTGC  
93220 93230 93240 93250 93260 93270 93280

14920 14930  
-----TCCACA-----TCGAATCAATAAAAA-----  
TC A A T AAT AT AAA A  
ATTTCATAAAAAAGGTCATTAAGTAAATTTATCAAAATTAATTAATTTTATTTTGTATAT  
94050 94060 94070 94080 94090 94100 94110

14460 14470 14480  
AG--GAGTTATCGTA-TTT-----CGCTG---GACGG---T  
AG GAG AT G A TTTG CGCTG GA GG T  
AGTTGAGCGATGGCACTTTGAGGAATCACGAGACCCCTCCAAGGCGAGTGTGCTGTAAGAAGTCTCT  
93290 93300 93310 93320 93330 93340 93350

14940 14950  
-----AATGCG-----CTAGAATT---TTA  
AATGC CT AATT TTA  
CTATAGTTCCATTTTTAGATGAGACTAATTTTGATTTTATTTTAAATGCTAAAGTCTTAAATCAATTA  
94120 94130 94140 94150 94160 94170 94180

14490  
GGTGTTC-AC-----GCTGCTC-----  
GG G TC AC G TC C  
GGAGTGCACAGCAGGATGCCCTCATCTCAGCTGGCTGGAACGTATCATACGCTGGACAGTGTGCT  
93360 93370 93380 93390 93400 93410 93420

TGTAAT-----  
T TAAT  
TATAATATAAAAAATAATAATTTCAAAAAATCAAAACTCCGAAATTCACACTCGGCCAATCTTAT  
94190 94200 94210 94220 94230 94240 94250

14500 14510 14520 14530 14540 14550  
-----TACTCCTTCGGGACACGCTCCTCATCCGGGCCAAGTACTTGGGCAATTTTGAGATTA  
TACTCCTTCGC A GCTCCT T CGGCGAAGTACTTG CAAA TTTGAGAT A  
TTCCGCTCGCTGTACTCCTTCGCGGTGATGCTCCTGCTTCGGGCCAAGTACTTGGCAACTTTGAGATCA  
93430 93440 93450 93460 93470 93480 93490

14960  
-----TGA-----  
T  
CGGATTTTAAAGTGTATACCTTCTGAACTCAGCTCCTCAGTACTAATTTCCCAATCAAAAATCTGAC  
94260 94270 94280 94290 94300 94310 94320

14560 14570 14580 14590 14600 14610 14620  
CGCTGGCCACTCCAATCGGTAGATGTTATGGATA-TGAAAGCAATTTACATACTAAAACTCCCTTTG  
C TGGCCACCTCCA CGGT G GT TGGATA T AG T A T AA T TT  
ACTTGGCCACTCCAACACGGTT--GTATTGGATATTTCTAGTGATAATTTGTGTCTAAGAGTGGGTTAT  
93500 93510 93520 93530 93540 93550 93560

ACTGTAAAATTTGATCGATTTTTTCAAATTTTCAAAGGGGTAACATCAAAAAATGACAAAAAATTTGTT  
94330 94340 94350 94360 94370 94380 94390

14630 14640 14650 14660 14670 14680 14690  
CCAGATGATGCTGATGGATCCCTGCTATCGGTGCTTCGGTTATGGTACCCTTGCCTCCACAGCAT  
AG TG T C AT CC T C TC T R G T T G AC T CT TC AT A C T  
AAAG-TG-TACAATTACTCCCTTCCGTCCAAATCTATTGCTCT-GAAACTATCTATCTAT-ATCCT  
93570 93580 93590 93600 93610 93620

AAAATTTTAAATTAACAATTTCCCAATATTTTGTACAGATCGAATGGGGATTAAGTACTGATTA  
94400 94410 94420 94430 94440 94450 94460

14700 14710 14720 14730 14740 14750  
GAACATTCCCGGATCTCGGGTGCAC-CAGTTGGTTGTC-TACCATTGTACTA-CATC-GCCCTGAC  
A AT C A CT GT C C CAG TG T GT T TGT CT C C G CTG C  
ATAATTC-----ACCTCGTSTCCCCACAGATGATGGTCTTGTGGCTTGTGGCGGCTCTGTT  
93630 93640 93650 93660 93670 93680 93690

TTGGTATTCGTPTTCAAATGGATTGAGAAATGATCGAGATATAGTCTCAGAAAATTTGGATTTTCAGT  
94470 94480 94490 94500 94510 94520 94530

14760 14770 14780 14790 14800 14810 14820  
ACCGCATCTCAGTGGTGTCTCTCGTCCATTCATTCAGGAGCTGCTGTCGA-----TCGTTA-  
C G CA CT GTG TG TC CC G A CC TTC G C CTG TGCA TC T TA  
TCGGCA-CT--GTGATATCCACAGCGGGAG-CCGTCTGTGGCGCTGGTGAATGACTTCACTAC  
93700 93710 93720 93730 93740 93750 93760

ATTTGAAAATTTTAAAAACATGCCATAATGCCGTCTTCCACTTGCATAACTCGGCTAATATTCGTC  
94540 94550 94560 94570 94580 94590 94600

-----CAGC-----



CGATTGAGAAATGTTATACCTTCCGGATCTTAGATCTTCGAGTACTATAATTTCCCAATCAAAATCTGAGA  
94610 94620 94630 94640 94650 94660 94670

ATGTAATAATTGACCCATTTTTGAAAATTTCAAGGGGFAACATCGCAAAAATTCACAAAATTGGA  
94680 94690 94700 94710 94720 94730 94740

ACAAATTTTTTGCTCAAGTTTTAAATATCGTATGCAGATCGAAGGAGATTGGTTCCTGATTCCTTA  
94750 94760 94770 94780 94790 94800 94810

ATGGTATCCGATCGCCAAACGGTCAAAAATAGCAGAGATATTTATAAAAACCATTTCAAAAACCGTA  
94820 94830 94840 94850 94860 94870 94880

AATAAGACTTCTGATATTTAATATCAGTTTCAATAAATTTAATAAAAATAAAAATAGCAAAATGGA  
94890 94900 94910 94920 94930 94940 94950

AAACTTACCGCCACTTAATTCAGTGTATTTTATACATACACTTTTACATCAATCTTTACATA  
94960 94970 94980 94990 95000 95010 95020

TTTACATCAATCTTACATATTTACATCCATCTTTACATATTTACATCTTTACATATGTTATGGCTCG  
95030 95040 95050 95060 95070 95080 95090

TTAACAAGTCAACGGTCTTTGTGTGGGAGCCGAAGTCTCTCCACACACACATCGGGGAATGGAGCA  
95100 95110 95120 95130 95140 95150 95160

CCCTCTTGAATTTCCCAATATTTCAAGCTTTGTTTAACTTAGATATAGTTTTCATAGCCACAGCTT  
95170 95180 95190 95200 95210 95220 95230

CGAGGATTAAGTTTTTTGAGCATTTTAACAATTTCTCAAAAGAAACACTATGTTGAGAGAGTTTTA  
95240 95250 95260 95270 95280 95290 95300

AACTCAAAACACACGCACCTGCGCCCATTTATTTGTTTACATTTGCGAAGCCATTTTCTCTTTTT  
95310 95320 95330 95340 95350 95360 95370

GCACAATTTCTTTTGCTTTTAAGCAGAATTTATAGTTAGAAGACCTTTTTAATATATATTTAACAAA  
95380 95390 95400 95410 95420 95430 95440

AAAGTGAATTTAAATCACAGCTTTGCCACAACAGGATGAGAGAAGATCACGAAACCAAGGATCACA

95450 95460 95470 95480 95490 95500 95510

AAAGCGAAGAACAAAGTGTGAGAGAGAAGCTAAAGTTACATTTGCCCCGTTTACCAACACAGGTGTTT  
95520 95530 95540 95550 95560 95570 95580

CCCCAACACTCCTTAGTTTGGCGCGAAAAGGCAGAGAGCTTTGAATTTCTACTCTTTCCCCCTTTTAAAT  
95590 95600 95610 95620 95630 95640 95650

-----TTTATTCAAAACAATTTGCTTTTCATTGGTGGTGGTTTT

-----TTTTATTCAAAACAAT CTTTCATT TT GTG TT

TAAAAATGCAAAATTTTCAATACTTTGGTTTATTCAAAACAATC--CTTTCATT--TTTGTGGTT-

95660 95670 95680 95690 95700 95710

95010 95020 95030 95040 95050 95060 95070

CCTTTTTTCTTTCTCATTTTGGTTGGTTGTCGCTTATTTGAGTGTGACTGCAGTTCCAGAAAAGGC--

TTTT TT TTT AT T TTTG T TTTGAG TT ACTGCAGTTCAGG AAGC

-TTTTATGTTTT--ATGGTTTTTGT-----TACTTTGAGTTTTAACTGCAGTTCCAGGGAAGGCAG

95720 95730 95740 95750 95760 95770

-----ATTTTTA-----ACGTTCCCTC-----GAACTAGTGGTAAACGTAAACTAAAATACAT-

-----ATTTTT A GT TC GAACTAG G C TAAAC TAAACTAAAATACAT-

TTGCAAGTTATTTTTTTTTTGAAGTTTTCATTTGAAACTAGGGACTAAACTTTAACTAAAATACATA

95780 95790 95800 95810 95820 95830 95840

95130 95140 95150 95160 95170

-CAATGAGTTC-PTTCGTGT--GTATTTGTGTTGTTGGTGGTTTTTT-----TTTGATA--

CAATGAGTT TTT TGTG G ATT GT F T T T T TTT TTT GAT

TCAAATGAGTTGTTTTTGTGTAGCATTGGTAAATTTTCTCTCTTTTCCGATCAGGTTCCGATTTTC

95850 95860 95870 95880 95890 95900 95910

95180 95190 95200 95210 95220

-----AATATTG-AAAGACAAACGACGCTCGT-----GCTTGAAA--TCGCCAGTTCCTGGTTTTT

AA A TG AA GA A GA TC T GC GAAA T G CA TT TGG T TT

GCCCCAAAACGTAAATGAGATTTGAAA--TCTTTTATTTTTCAGCCCGAAAGTAGGCAATTTGGGATGTT

95920 95930 95940 95950 95960 95970 95980

95230 95240 95250 95260 95270 95280

T-----TTTTCAAAACTGACGTT-TTCAAAAACCGCACAGTTTTCGCTCGAG----ATGTGAAGCTGC

T T T C A C A G T T T A A A A T T T G A A G T G A G T C

TGACCTGTCCGATCCATAAGTAATGCTTGATATATAATA-TTATATAGAATAGTACGTGAAGATGC

95990 96000 96010 96020 96030 96040 96050

95290 95300 95310 95320 95330 95340

GGCAAAACAAT-----CTCAAAACCAAGTAACGCACATCTCTCTTACCGCCATTCACACTATT

GGCAAAACAAT CTCAAAACCA AC TC TC TT T A C ATT AT

GGCAAAACAATTCAAAATTTCAAAACCGA-----ACCTC--TCATTARA--CTATT-----ATG

96060 96070 96080 96090 96100

95350 95360 95370 95380 95390 95400 95410

CATATATCCCTCTTTGTGTATATAAACAATTTTAGTTCCTTTTTTTTTTTTTTCTTAGCGTTTGTCTT

ATATATCCCT TATA CTA C

TATATATCCCT-----TATAGCTAGC-----

96110 96120

95420 95430 95440 95450 95460 95470 95480

GCAACTTATGTACTAGAATGATTTCCAGGGATTAGGGGAAAACATAAAATCTTACTGGATATACGTGT

AAATCTTA G TATA

-----AAATCTTATCGTGATAA-----

96130 96140

95490 95500 95510 95520 95530 95540 95550

TTTGTAGCCAGTTTAGTTGGTAAATGATTTATCATACGATAGATAGTTTACTAATTACTCCGA---

-----GTTAGCC TTTAGTTGGTAAATGATTTATCATAC AT ATA GTT CTAATTA TCCGA

---GTTAGCCA---TTTAGTTGGTAAATGATTTATCATACTAGTATATAGTTTCTAATTAATCCGATTCA

96150 96160 96170 96180 96190 96200

¶5560 ¶5570 ¶5580 ¶5590 ¶5600  
-TTACTCGCCCTATTATGGA-CTTTTTCTTGAGACTCG--CCCTCGCGA-ATA-----  
TT CT G C TATT TG A C TTT CTT AG C CG CCCT C A ATA  
CTTCCTAGACTTATTTTGTATCTTTCCCTTACAGCCCCGCCCTAACTATATATATTTTATTTTATT  
¶6210 ¶6220 ¶6230 ¶6240 ¶6250 ¶6260 ¶6270  
  
-----  
¶5610 ¶5620 ¶5630  
-----ATCATTTGATT-----ACCACCATGGAGAT---AATGG----  
AT TTT TT A ATGGA AT AATGG  
TATTTTATTTTCTGGCTCTTGTATTTTTTTTTTTTTCTGAGGCGGATGGATATATAGAAATGGAGGGG  
¶6280 ¶6290 ¶6300 ¶6310 ¶6320 ¶6330 ¶6340  
  
-----  
¶5640 ¶5650  
-----TCGAG-----GGC-----TAGCACATT  
TGGATT TCGAG GGC TAGCACAT  
AAGATGATTGATTGATTGATTGATCGATCAATCGAGTGATTGAGGCTGGGAGGGGATAGTAGCACATA  
¶6350 ¶6360 ¶6370 ¶6380 ¶6390 ¶6400 ¶6410  
  
¶5660 ¶5670 ¶5680 ¶5690 ¶5700 ¶5710 ¶5720  
TTGGTAAGGTAATTTTCATCTGCTTTTCGTACTTGGATGCGGTACCTTGAAGGTCGCTCTGGCCTGACT  
TTGGTAAGGTAATTTTCAT TGCTTTTCGT TT A GC A CTGG G TC C GAC  
TTGGTAAGGTAATTTTCATTTGCTTTTCGT--TTTAGGCC--AACTG--GCTCTAC-----GACC  
¶6420 ¶6430 ¶6440 ¶6450 ¶6460 ¶6470  
  
¶5730 ¶5740 ¶5750 ¶5760 ¶5770 ¶5780 ¶5790  
TGATCCCGCTAGCAAACGTAGTCTTCACTTAGGACTAATAAATAAATGTTCTTGGTTTATTTTCC  
T TC GCT TC TA T CTTA AT TAATAAATAAATGTTTCTTG TTT A TT  
CAATTCGGCT-----TCCTAAG--TTGCTTA--ATTTAATAAATAAATGTTTCTTG-TTTCAGATTTA  
¶6480 ¶6490 ¶6500 ¶6510 ¶6520 ¶6530  
  
¶5800 ¶5810 ¶5820 ¶5830 ¶5840 ¶5850 ¶5860  
ATGGTTTGGCTTCTCTTTTTTTTTTGTGTTTCTTTTTTGTATGCTTGCTTTAAATGTTTATCCA  
AIG TTG TTTTTTTTTTGT T TT TTCT  
ATGTTTTG-----TTTTTTTTTTGTTTTTATTTCA-----  
¶6540 ¶6550 ¶6560  
  
¶5870 ¶5880 ¶5890 ¶5900 ¶5910 ¶5920 ¶5930  
TCCGTTTTGTTCTCAGCTTAGTGCAGCTTACTCGCCCCATTTATCAGTTAATTTATTTATGTTTG  
TT TTCTCAG T CC T TATCAGTTA TT TTAT AT TTG  
-----TTCTTCTCAGAT-----CCATTCATCAGTTATTTTATATGATTTTTG  
¶6570 ¶6580 ¶6590 ¶6600  
  
¶5940 ¶5950 ¶5960 ¶5970 ¶5980 ¶5990 ¶6000  
TATATAAATAAATTTGGTATAATCGAGTCTTTACGGCAAAACAAAACAGAAATATGCTATTTGATTTCT  
TATATAAATAAATTTGGTATAATCGAGTCTTTACGGCAAAACAAAACAGAAATATGCTATTTGATTTCT  
TATATAAATAAATTTGGTATAATCGAGTCTTTACGGCAAAACAAAACAGAAATATGCTATTTGATTTCT  
¶6610 ¶6620 ¶6630 ¶6640 ¶6650 ¶6660 ¶6670  
  
¶6010 ¶6020 ¶6030 ¶6040 ¶6050 ¶6060 ¶6070  
TCAATTTGTTTTCTACTTAGTATATCATGATCTTGCATCAT-----TATCATTAAATCGTT-----TCATTG  
TCAATTTGTTTT C TAGT T TC T TT T T TATCATT TC TT TCATT  
TCAATTTGTTTT-CATAGTTTTTCTTTGTTTTTTTTTTTTTTTATATCATTTTTCATTTGTTCTCAT-  
¶6680 ¶6690 ¶6700 ¶6710 ¶6720 ¶6730 ¶6740  
  
¶6080 ¶6090 ¶6100 ¶6110 ¶6120  
TTTCTATAAATACATAAATAATCAAAATATATCTGTATACTATATTA-TATTAAGT-----  
TTT T TAAATACATAAATAATCAAAATATATCTGTATACTATATTA TATT AGT  
TTTTTTTTTAAATACATAAATAATCAAAATATATCTGTATACTATATTAATATTAGTTTGTCTTTTT  
¶6750 ¶6760 ¶6770 ¶6780 ¶6790 ¶6800 ¶6810  
  
¶6130 ¶6140 ¶6150 ¶6160 ¶6170 ¶6180 ¶6190  
-----TTTGTCTTTTCAAGTCTTGAACCAAACTATTTAGGCTTTTCGATCTATTTGTCGGT  
TTTGTCTTTT AAAGTTC TGAACCAAACTATTTAGGCT TT TCTA  
TTTTTGTCTTTTTTAAAGTTCGTAACCAAACTATTTAGGCTTT-----TCTA-----  
¶6820 ¶6830 ¶6840 ¶6850 ¶6860 ¶6870  
  
¶6200 ¶6210 ¶6220 ¶6230 ¶6240 ¶6250 ¶6260  
GTCTCTCCGTTTTGTCGGCTTGTCCAGTTCTCCGCTCCGCTCTGTTAATTTGTTAATGTTAAT  
T TC GCTTGT GT T TTCT T TT ATT TT TGTAAAT  
-----TTTCTGCTTGTGGTATT-----TTCT-----TTTTTATT-TTGTGTTAAT  
¶6880 ¶6890 ¶6900 ¶6910

¶6270 ¶6280 ¶6290 ¶6300  
TGTGGTTCGCTTGTGTTGCTCTAACAAAAA  
T T TT TGT TT TT TAACAAAAA  
TTTTAAATTTATGTTTTTTTTT-----TAACAAAAA  
¶6920 ¶6930 ¶6940 ¶6950



12210 12220 12230 12240 12250 12260 12270 12280 12290 12300  
CCCCCCCCTTTTTTTTCAACATACTATCCATAAGTTCCTAGTGCCTTGCACTTTGGCTTAGGCTTCTGCTGCAATATGTGGCTCTTAGCACT

12310 12320 12330 12340 12350 12360 12370 12380 12390 12400  
CGCTATCGTAACATACTCGTTTCGCTAAAATAAATAACATTAATCGTTTGATTGATTCATTCGCTCGAAATGGATAATAGAAGACCTTATTATTGTTAT

12410 12420 12430 12440 12450 12460 12470 12480 12490 12500  
TATTTTATTTATGCGTCAAGACCATACATGATAATACATTGGTATTTTGGGAATAGGTTAATATACATTTCTTCGGCAAAATGATGCTTTCTCTATT

12510 12520 12530 12540 12550 12560 12570 12580 12590 12600  
CCACTGTGATTACATCCAGGAGCGCATCGAATAACAGCCTATTACATTCCTTCTCAITTCAGGCAATCAGATCTTTCAGGTCCTTATATGCTCTTA  
TCGAA

12610 12620 12630 12640 12650 12660 12670 12680 12690 12700  
GGCTCGGACACATCTTAAAGTATTCTTCTCGGACTCTGAAGACTCGCAACCTTCTCTCTCTGGTGGACGATTCACTTGGCTGCTCAGGAT  
CCTCG

12710 12720 12730 12740 12750 12760 12770 12780 12790 12800  
CTCGTCACTGTTGTTGTTTATAGTGCCTTCGCAATCCGCGTTCGACTTCTCTGCCATTTCTAAATTCAGTTGAGCTCTGGATATTGTTTCTTAGGCAA

12810 12820 12830 12840 12850 12860 12870 12880 12890 12900  
TTGGTGGAGACGAAAGTGAATTTATTTTCAGTCGCAAGCAATTCATGTTACAGTCTCAGCGACATGCCAACTTGATCGAAATTCAGTGGATTTTCA

12910 12920 12930 12940 12950 12960 12970 12980 12990 13000  
ATGGTTCCTTTGAAATAGGAATGCTCGAATATACAAAGTTTGAAGAAATTTGCCATATATATATCATTTGAGCAATATATCCAATCTCGAACTTGCT

13010 13020 13030 13040 13050 13060 13070 13080 13090 13100  
CTCACCTTAAAGACGGATTATTTATTTATATAGACAAAGATGATTATTTGTTGTTTATAGTATATAGAATGTGCTAATTAACGACCACTTAAGT

13110 13120 13130 13140 13150 13160 13170 13180 13190 13200  
AATGCCATAATATAAATTTATGCGTAAACATAAGTCCATTCGATAACATAGTGTGACCAATATAGCATTTGGTATATTTGGTATATGATCAGGACTGGT

13210 13220 13230 13240 13250 13260 13270 13280 13290 13300  
TATCAACGGAGGTGTGCAACTCTTTCGAATTTAAGCACCACAATTTGGCCTCGCCTCACACCATGAAAGATCACAGCTGGAGAAACGTTAATTTCTGAC

13310 13320 13330 13340 13350 13360 13370 13380 13390 13400  
TCATCATACATAGACGCTAGGAACGCTTCTGCTCTTCTGGCCAGGATCTTGGTAAATATGTTGTGCGCTTAACTACGCTACGCCACCGTATTACTGAGAA

13410 13420 13430 13440 13450 13460 13470 13480 13490 13500  
ACCGTTTCAGGAATCTTCAATTCATCGCGTCTGTGTTGATGGTGGATCTCAACTGCAGCTTCAACTTCAAGATGTCAGGAAGCTTTGAGACAGATGGTT

13510 13520 13530 13540 13550 13560 13570 13580 13590 13600  
CCTCAGTAAATACATTTCAATGGGATCTGGAACGCTTAACCTACGCAATAGCTCCAATATTATGAAAGCCAGCGCTTCTGCGATTGACACCCCTTCC

13610 13620 13630 13640 13650 13660 13670 13680 13690 13700  
ACCTGGAACATAACCCAAAACCTTATGCTCGCGGACCCAGAGTTTCGTAGTCTTCAACGCATTGATTTACTGATGGGCGCCAGTCCAGTCTCTTCTAGC

13710 13720 13730 13740 13750 13760 13770 13780 13790 13800  
AATCGTGTGCGTCCGTCAGTCAAGCTTCTGTCGGGTTTGGCCGCTAATGCAACGGACTCAGTTAGGCTGGATTGTTTCTGGATCTTGCAGTCCGCCAGA

13810 13820 13830 13840 13850 13860 13870 13880 13890 13900  
TGTCCAGGACTCCATAGCTACTGGGTCCACTACAACATAAATTTAGAAGAACCTCAAGGATCAGGACAGTCTAGCCAGCTAGCTCACGTGCTCGCTG

13910 13920 13930 13940 13950 13960 13970 13980 13990 14000  
CATCCAGATGGCTTCGTGAGTATATGTTAACTGGAGATGCTTTCATTGGATTCAAGTACCGCAACCAATATTCGACCGAAGAAATCATAAAGCAGAA

14010 14020 14030 14040 14050 14060 14070 14080 14090 14100  
TCATAAAGCAGAAATCGAGGCGAGAGTGAAGCTGCGCCCTTTAAGAAATCTGTTGAAATCTCTTTTCAATGCTAATCTTACCGCCAGACAATCCGCT

14110 14120 14130 14140 14150 14160 14170 14180 14190 14200  
TAAGCGTCAACAATTTCAACTTTTTAATTTTCAATGATCATGATATGTTAAAGTATTTTGACAATGGGACCAACCAAAAAAAGAAAGCAAGCCG

14210 14220 14230 14240 14250 14260 14270 14280 14290 14300  
TCTGCAATCTTAAAGCAATTCATGATATGATAGCGAAATATTAGAATTTTTTCTAAGCACTCCACCAGCTGAGAAAAGGATCTTTTATCGTACT

14310 14320 14330 14340 14350 14360 14370 14380 14390 14400  
TATTCGTTTCCAGCGTCTCTCTCTTTTCTTAATGAAACATCAGAGATCTCAATTTCAACTGCTGAAAAATAAATTCATGATAGGAAAGCGCT

14410 14420 14430 14440 14450 14460 14470 14480 14490 14500  
TCCCTTCGCTGTTACATACTTTTCAAGCAATCTAGCACTTATAGTTTACAAAATTAATCGCTTGTCAAATCGAATTCACGTCGAATCCACTTTGGCAAC

14510 14520 14530 14540 14550 14560 14570 14580  
CACCACCTAATCGATATTATATAAGTAA--ATTAATAGTAGCAG-----TATTATATAACAGTATA--TAACATAATCATATTATTATGT

ATATTATATAA GTAA AT AG GCAG TATTAT T A A TAT TA TAATCA AT ATATTGT  
-----ATATTATATAAAGTAAATCCATGCAAGCTGAGCTCAATCAAATGTTATTATGAGAAATATTGTTATGTAATCAATAATATTATGT  
\*2050 \*2060 \*2070 \*2080 \*2090 \*2100 \*2110 \*2120 \*2130 \*2140 \*2150 \*2160 \*2170 \*2180 \*2190

\*2040

14590 14600 14610 14620 14630 14640 14650 14660  
 AACATTTAATATGTAATATTTG-----TCA-----ATACATACGCCAAATTAATTTGAGTAGCTAATTTATACCTAATTTCCGG  
 A A TATT TTATGTAATATTTG T A A ACAT GCAA T ATTGT GT AAT CTAATTA TAC T ATTT CG  
 GAGAATATTTGTTATGTAATATTTGCTGCAGCTGATATATGTACCAACACACATGGGCAATTCGATTTGCGTAAACTAACTAACTACTTCATTGGCA  
 14670 14680 14690 14700 14710 14720 14730 14740  
 GCACCAACTATCAAGGATATTTTCACTCGCGCCCTCCCTTTCC-----ACCTC-----CAGTACAGAGTGGAAATTTTATTAATCTTTG  
 GC CCAACT TCAAGGATATTTTCACTCGC GCCTCCCT CC A CTC CAG AGCAGTG AATTTTAAATTAATCTTTG  
 GCGCCAATCTCAAGGATATTTTCACTCGCGCCCTCCCTCCCTCCCTTCGCGCTTTAATAATCTACAGCTCAGCAGCAGTGGAAATTTTATTAATCTTTG  
 14750 14760  
 CCACTTTTGGCGGCTGACTTT-----  
 CCACTTTTGGCGGCTGACTTT  
 CCACTTTTGGCGGCTGACTTTGCGGGTACGCTGCTNNNNNNNNNNNNNNNNNNNNNNNNNNNNNNNNNNNNNNNNNNNNNNNNNNNNNNNNNNNNNN  
 14770 14780 14790 14800  
 GCGGTAGCTGCTTAAATATCGCTCGCGGATCAAAGCC  
 GCGGTAGCTGCTTAAATATCGCTCGCGGATCAAAGCC  
 AATATCTCAGCTCAGCAGCAGTGGAAATTTAAATACTTTGCCACTTTTGGCGGCTGACTTCCGCGGTAGCTGCTTAAATATCGCTCGCGGATCAAAGCC  
 14810 14820 14830 14840 14850 14860 14870  
 CATTTTGCTCAGGCCACCGAAGCAATCACTCACTTGCAGGCACAAGCAGCTCACACGGACGCACACAGA-----  
 CATTTTGCTCAGGCCACCGAAGCAATCACTCACTTGCAGGCACAAGCAGCTCACACGGACGCACACAGA  
 CATTTTGCTCAGGCCACCGAAGCAATCACTCACTTGCAGGCACAAGCAGCTCACACGGACGCACAGAAAGCAAAACGACGCACACAGACGCACACAG  
 14880 14890 14900 14910 14920 14930 14940 14950 14960 14970  
 -CAGCAAAACCAAGTCCCGCAGAGTATGCCACACTTATTTGCAATAACTCTTTGCGGAAACCGAAGTAAAGCGGCTGGGAAACTCCCACTGCCACTCCAT  
 CA GCAAAACCAAGTCCCGCAGAGTATGC ACA TTAATTTGCAATAACTCTTTGCGGCA G GAAGT AGCGGCTGGGAAACTCCCA CGCACTCCAT  
 ACAGGCAAAACCAAGTCCCGCAGAGTATGCACATTTATTTGCAATAACTCTTTGCGGAGCTGAAGTGAAGCGGCTGGGAAACTCCCAACGCACCTCCAT  
 14980 14990 15000 15010 15020 15030 15040 15050 15060  
 CATCGCAATTACTATACCGCGATGTAGCAAAATATTTGCCCACTCAGCTCACATCCACAGTGGCCACACACACACACAC-----AAACAT  
 CATCGCAATTACTATACCGCGATGTAGCAAAATATTTGCCCACTCAGCTCACATCCACAGTGGCCACACACACACAC A ACAT  
 CATCGCAATTACTATACCGCGATGTAGCAAAATATTTGCCCACTCAGCTCACATCCACACAT--CTGACACACACACACAGCAACACACACACAT  
 15070 15080 15090 15100 15110 15120 15130 15140 15150 15160  
 GGGATTGCGAATGCCAAACAGGACCAAAACAGTGCCTGCTTTGCTGCTTTGGAAAGATACCGATACTTTAATGCCGGCTGTGTAGCACATCAAATTA  
 GGGATTGCGAATGCCAAACAG T GTCCTGCTT GGAAGATACCGAT C TTAATGCCGGCTGTGTAGCACATCAAATTA  
 GGGATTGCGAATGCCAAACAG-----TAGTCTGCTG-----GGAAGATACCGATTTCTTAATGCCGGCTGTGTAGCACATCAAATTA  
 15170 15180 15190 15200 15210 15220 15230  
 GCGCTCCCTGCTGCCGACAACAATTTGTTTGTCCAACACTCTCTTTT-----TCGGATCAGAATCAGAGTCAAG-----  
 GCGCT CCCT C GCGCAACAACAATTTGTTTGTCC ACACCTCTCTTT TCG A CAGA TCGAGA TCAAG  
 GCGCTGCCCTTCGCGCCACAACAATTTGTTTGTCCGACACTCTCTTTTCACTTTTTCGTAGCAGACTCGAGACTCAAGCAGTGGCCATTTCCCATTTT  
 15240  
 AAG  
 A G  
 GCTGGACTTGGCGAGCTGAGTTGGCCAAATGGAGCCAAAGAGGGCTCAGG  
 15250 15260 15270 15280 15290 15300 15310 15320 15330 15340 15350 15360 15370 15380 15390 15400 15410 15420 15430 15440 15450 15460 15470 15480 15490 15500 15510 15520 15530 15540 15550 15560 15570 15580 15590 15600 15610 15620 15630 15640 15650 15660 15670 15680 15690 15700 15710 15720 15730 15740 15750 15760 15770 15780 15790 15800 15810 15820 15830 15840 15850 15860 15870 15880 15890 15900 15910 15920 15930 15940 15950 15960 15970 15980 15990 16000 16010 16020 16030 16040 16050 16060 16070 16080 16090 16100 16110 16120 16130 16140 16150 16160 16170 16180 16190 16200 16210 16220 16230 16240 16250 16260 16270 16280 16290 16300 16310 16320 16330 16340 16350 16360 16370 16380 16390 16400 16410 16420 16430 16440 16450 16460 16470 16480 16490 16500 16510 16520 16530 16540 16550 16560 16570 16580 16590 16600 16610 16620 16630 16640 16650 16660 16670 16680 16690 16700 16710 16720 16730 16740 16750 16760 16770 16780 16790 16800 16810 16820 16830 16840 16850 16860 16870 16880 16890 16900 16910 16920 16930 16940 16950 16960 16970 16980 16990 17000 17010 17020 17030 17040 17050 17060 17070 17080 17090 17100 17110 17120 17130 17140 17150 17160 17170 17180 17190 17200 17210 17220 17230 17240 17250 17260 17270 17280 17290 17300 17310 17320 17330 17340 17350 17360 17370 17380 17390 17400 17410 17420 17430 17440 17450 17460 17470 17480 17490 17500 17510 17520 17530 17540 17550 17560 17570 17580 17590 17600 17610 17620 17630 17640 17650 17660 17670 17680 17690 17700 17710 17720 17730 17740 17750 17760 17770 17780 17790 17800 17810 17820 17830 17840 17850 17860 17870 17880 17890 17900 17910 17920 17930 17940 17950 17960 17970 17980 17990 18000 18010 18020 18030 18040 18050 18060 18070 18080 18090 18100 18110 18120 18130 18140 18150 18160 18170 18180 18190 18200 18210 18220 18230 18240 18250 18260 18270 18280 18290 18300 18310 18320 18330 18340 18350 18360 18370 18380 18390 18400 18410 18420 18430 18440 18450 18460 18470 18480 18490 18500 18510 18520 18530 18540 18550 18560 18570 18580 18590 18600 18610 18620 18630 18640 18650 18660 18670 18680 18690 18700 18710 18720 18730 18740 18750 18760 18770 18780 18790 18800 18810 18820 18830 18840 18850 18860 18870 18880 18890 18900 18910 18920 18930 18940 18950 18960 18970 18980 18990 19000 19010 19020 19030 19040 19050 19060 19070 19080 19090 19100 19110 19120 19130 19140 19150 19160 19170 19180 19190 19200 19210 19220 19230 19240 19250 19260 19270 19280 19290 19300 19310 19320 19330 19340 19350 19360 19370 19380 19390 19400 19410 19420 19430 19440 19450 19460 19470 19480 19490 19500 19510 19520 19530 19540 19550 19560 19570 19580 19590 19600 19610 19620 19630 19640 19650 19660 19670 19680 19690 19700 19710 19720 19730 19740 19750 19760 19770 19780 19790 19800 19810 19820 19830 19840 19850 19860 19870 19880 19890 19900 19910 19920 19930 19940 19950 19960 19970 19980 19990 20000

5i)

CG15323:melanogaster (above), erecta (below)  
 Martinez/Needleman-Wunsch DNA Alignment  
 Minimum Match: 9; Gap Penalty: 1.10; Gap Length Penalty: 0.33

1260 1270 1280 1290 1300 1310 1320  
 GCTCTTTAAGTGAAGACAGTACAGATAAACACAAATAGCATACCAGACCCGGGACACCCCAAAATTTT  
 GCTCTTTAAGTGAAGACAGTACAGATAAACACAAATAGCATACCAGACCCGGGACACCCCAAAATTTT  
 GCTCTTTAAGTGAAGACAGTACAGATAAACACAAATAGCATACCAGACCCGGGACACCCCAAAATTTT  
 1330 1340 1350 1360 1370 1380 1390  
 CAAACAGCCCACTTTTCGCATCGTGAACAACTTGTGGGTGTATTATTGATCCATCCTCGTAAGTGAAA  
 CAAACAGCCCA T TTC CATCGTAA TGTGGGTGTA TTATGATCCATCCTCGTAA TG AA  
 CAAACAGCCCACTATTCCTATCGTGAACCTGATGTGGGTGTATTATTGATCCATCCTCGTAAATGGAA  
 1400 1410 1420 1430 1440 1450 1460  
 ATTTCGTTTCCGAGTTGCTGACAGCAATATGAGTGTGGTGCCTACAGTCAATTCAGTTAGTCTAA  
 ATTTCGTTTCCGAG TTCTGACAGCAATATGAGTGTGGTGCCTACAGTCAATTCAGTTAGTCT A  
 ATTTCGTTTCCGAGTTGCTGACAGCAATATGAGTGTGGTGCCTACAGTCAATTCAGTTAGTCTGCA  
 1470 1480 1490 1500 1510 1520  
 GTTTTCAGATAGCTTCCACGAATGAATAGCTGGTATTTCCTCCCGCA-----  
 GTTTTCAGAT GCT TCCACGAATGAATAGCTGG TATTTCCTCC G A  
 GTTTTCAGATTTGCTATCCACGAATGAATAGCTGGTATTTCCTCCCGCAAGACAGGACAGAACAGGAA  
 1520 1530 1540 1550 1560  
 -----AAACCGAACAGAAACAGATACAGAACTGAAACTGAACTGAATCAAAGCCTGTA  
 AAACCGAACAA GAACTGAATCAAAGCCTG A  
 AGAACAGAAACAGAAACAGAACTGAAACTGAAACTGAACTGAATCAAAGCCTGCA  
 1570 1580 1590 1600 1610 1620 1630  
 GTTTTTGTGCTTTTGGTTTCTAGTTTCCAGCTCGGCACCTAAAGTGGAAATATCGTGCAGTCAAAG  
 TTTTGTG T GTTCT G TT CAGCT GGCCTAAA GG A GCA CG G AGTCAAAG  
 CTTTTTGTGCTTTTGGTTTCTAGTTTCCAGCTCGGCACCTAAAGTGGAAATATCGTGCAGTCAAAG  
 1640 1650 1660 1670 1680 1690 1700  
 TGAGGTCAGTACTCGCACTAATCTGCAACTCTGCTTTGTAAGTACATACATATATGTATACATAT  
 GAGGTCAG ACTCGACTA CTGCAACT TC CTTG AAGT A ATAT  
 GAGGTCAGGCACTCGCACTAGCTCTGCAACTTCTTCTTGAAGCT-----ATATAT  
 1710 1720 1730 1740 1750 1760 1770  
 TTCTAAATAG-TTTTGAAGATGAAAATCATATAAGCAATGGGAGTCAATTCGCTTGGCTCACAG  
 TTCTAAATAG TTTTGAAGATGAAAATCATATAAGCAATGGGAGTCAATTCGCTTGGCTCACAG  
 TTCTAAATAGTTTTTGAAGATGAAAATCATATAAGCAATGGGAGTCAATTCGCTTGGCTCACAG  
 1780 1790 1800 1810 1820 1830 1840  
 CTGGCTCCAGCAGTATTACTAAGCAAACTAATACGATTAGACGGCCCAAGTACACTCAGGA  
 CTGGCTCCAGC GCTGATTACTAAGCAAACTAATACGAT TAGACGCCCC A G TACACT GGA  
 CTGGCTCCAGCAGTATTACTAAGCAAACTAATACGATAGACGCCCC-ACGGGTACACTCAGGA  
 1850 1860 1870 1880 1890 1900 1910  
 CATCTAGATGGCGTTTTGCAATCTCGAAAGATTAGCTTTGTAAGTCCCAATTTCTTAATCAATTT  
 ATCTAGATGGCGCT TT G CTGGA C TC ATTT CT A CA  
 AATCTAGATGGCGCTATT-----GGCTTGACATCTTC-ATTTGCTGACCA-----  
 1920 1930 1940 1950 1960 1970 1980  
 GTTTCGTTTACACCGTTTCTGCTTAAAGGAAATGGTTGCAAAAAGATATATATGATGATTTAGT  
 ATTTAGT  
 -----ATTTAGT



12530 12540 12550 12560 12570 12580 12590  
AGGAGGCGATCGAATAACAGCCTATTACATTCCCTCTCATTAGGCGAATCAGATCTTTCAGGTCCTTTA

12600 12610 12620 12630 12640 12650 12660  
TGTCCTTATCGAAGCGCTCGGACACATTTCTAAAGTATTTCTCCCTCGGACTCTGAAGACTGCGAACCCTT

12670 12680 12690 12700 12710 12720 12730  
CTCCTCTCGGGTGGACGATTCACTTGGCTGCTCAGGATCCCGCTCGCATGTACTTGTGTTTTAGAT

12740 12750 12760 12770 12780 12790 12800  
GCCTTCGCATCCCGCTTCGACTTCTCTGCCATTTCTAAATTCAGTTGAGCTCTGGATATTGTTTCCTAGG

12810 12820 12830 12840 12850 12860 12870  
CAATTTGGTGAGCGAAAGTGAACTTTATTTTTCAGTCGCAACGAAACTTCATGTTACAGTGTCCAGCGACAT

12880 12890 12900 12910 12920 12930 12940  
GCCAACTTGATCGAAATTCAAATGTGGATTTCAATGGTTCCTTTGAAATTAGGAATGCTCGAATATACAA

12950 12960 12970 12980 12990 13000 13010  
AGTTTGAATAATTTTGGCATAATATATATCATTTGAGCAATATATCCAATTCGAACCTTGTCTCTCACTT

13020 13030 13040 13050 13060 13070 13080  
AAAAGACGGATTATTTATCTATATTTAGACAAGATGATTATTTTGTGTTTTATAGTATATAGAAATGT

13090 13100 13110 13120 13130 13140 13150  
GCTAATTAACGAACCATTTAAGTAAATGCCATAATATTAATTTATGCGTTAACACTAAGTCCATTGATA

13160 13170 13180 13190 13200 13210 13220  
ACATAGTGTGACCATAAATGCAATGGTATTTTGGTATATTTGATATCAGGACTGGTATCAACGAGGGTGTGC

13230 13240 13250 13260 13270 13280 13290  
AACTCTTTCGAATTTAAGCACCAAAATTTGGCCTCGCCTTCACCACATGAAAGATCACAGCCTGGAGAAAC

13300 13310 13320 13330 13340 13350 13360  
GTTTAACTTGACTCATCATACCATAGACGCTAGGAACGCTCTTCGCTCTTCTTGCCAGGATCTTGTA

13370 13380 13390 13400 13410 13420 13430

AATATGTTGTGGCCCTTAATCACTGCCACCGTATTACTGAGAAACCGTTTCAGGAATCTTCATTTTCATGCC

13440 13450 13460 13470 13480 13490 13500  
GTGCTCTGTTTGTATGGTGGATCTCAACTGCGAGCTTCAACTTCAAGATGTCAGGAAGCTTTGAGACAGATG

13510 13520 13530 13540 13550 13560 13570  
GTTCCGTCAGTAAATACATTTCAATGCGATCTGGAACGCTTAACACTGCAATAGCCTCAATATATTGA  
AGTAAATAC AATG ACTACT  
-AGTAAATACT--AATG--ACTACT--  
11810 11820

13580 13590 13600 13610 13620 13630 13640  
AAGCCAGCCGTGCTTCTGCATTGACACCCCTTGCACTGGAACATAACCCAAAACCTTATGCTCGCGGACC

13650 13660 13670 13680 13690 13700 13710  
CAGAGTTTCGTAGTCTCAACGCATTGATTTACTGATGGCGCCAGTGCAGTCTCTTCTACGAACGTCT  
CGCC AACCTG  
-CGCC--AACCTG--  
11830

13720 13730 13740 13750 13760 13770 13780  
GTGCGTGGTCAAGTCAAGCTTCTGTCCGGTTTGGCCGTAATGCAACGGACTCAGTATGCTGGATTGTT

13790 13800 13810 13820 13830 13840 13850  
TCTGGATCTTGCAGTCCCGCAGATGTCACGGACTCCATAGCTACTGGTCCACTACAACATAAATCTTAGA

13860 13870 13880 13890 13900 13910 13920  
AGAACTCAAGGATCAGGACAGTCTAGCAGCCTAGCTCACGTGCCTCGCTTGCATCCAGATGGCCTTCG

13930 13940 13950 13960 13970 13980 13990  
TCGAGTATATGGTAACTGGAGATGCTTTCATTTGGATTGAGTACCGCAACCAAACTTATCGACCGAAGAA

14000 14010 14020 14030 14040 14050 14060  
TCATAAAGCAGAATCATAAAGCAGAATCGACGAGCGAGAGTGAGTCCCGCCCTTAAAGATTTCTGTG

14070 14080 14090 14100 14110 14120 14130  
AAAATCTTCTTTTCATTGCTAATCTTACGCCGACAATCCGCCCTTAAGCCGTACAACCTTTACAACCTTTT

14140 14150 14160 14170 14180 14190 14200  
AATTTTCATGCATCATGATGCTAAAAGTATTTTGACAATGGCGACCAACCAAAAAAAAAAAACGAAAC

14210 14220 14230 14240 14250 14260 14270  
CCGCTCGCAATCTTAAAACATTCATTCGATATGATAGCGAAATATTAGAAATTTTTTCTAAGCACTCC

-----  
\*4280 \*4290 \*4300 \*4310 \*4320 \*4330 \*4340  
ACCAGCTGAGAAAAGGGTATCTTTTAATCGATTTATTCGTTTCACAGGTTCTCTCCTTTTTCCTAAATTGA

-----  
\*4350 \*4360 \*4370 \*4380 \*4390 \*4400 \*4410  
AACATCAGAGTCTCATTTCTAACGACTGAAAAATAAAATTCATGTAGGGAACGCTTCCTTCT

-----  
\*4420 \*4430 \*4440 \*4450 \*4460 \*4470 \*4480  
GCCTGTACATACTTTTCAACGAATCTAGCAACTTATAGTTACAAAATTAATCGCTTGTCAAATCGAAT

-----  
\*4490 \*4500 \*4510 \*4520 \*4530 \*4540 \*4550  
TCACGTCGAATCCACTTGGCAACCACCACCTAATCGATATTATATAATAGTAAATTAATAGTAGCAGTAT

-----  
\*4560 \*4570 \*4580 \*4590 \*4600 \*4610 \*4620  
TATATAACAGTATATAACTAATCATATATATTATGTAACATTAATATATGTAATATTGTCAATACATAC

-----  
\*4630 \*4640 \*4650 \*4660 \*4670 \*4680 \*4690  
GCAAAATTAATGTAGTGAATGCTAATTAATTAATTTTCGGGCACCACTATCAAGGATATTTTCACC  
-----TCAAGGATATTTTCACC  
\*1840

-----  
\*4700 \*4710 \*4720 \*4730 \*4740  
TGCTGCCCTCCCTTTCCACCTC-----CAGTAGCAGTGGAAATTTAATTACTTTGCCAC  
TG T C CCC TC CCTC CAG AGCAGTG AAATTT TAATTACTTTGCCAC  
TGTTTTCACCCCTCGCCCTCAATAATATCTCAGCTCAGCAGCAGTGAATAATGTAATTACTTTGCCAC  
\*1850 \*1860 \*1870 \*1880 \*1890 \*1900 \*1910

-----  
\*4750 \*4760 \*4770 \*4780 \*4790 \*4800 \*4810  
TTTTGGCGGCTGACTTTGGCGTTAGCTGCTTAATAATCGCTCGCGATTCAAAGCCATTGTCTCAGGCC  
TTTTGGCGGCTG CTTTGGCGTT GCTGCTTAATAATCGCTCGCGATTCAAAGCCATTGTCTCAGGCC  
TTTTGGCGGCTGCCTTTGGCGTTGGCTGCTTAATAATCGCTCGCGATTCAAAGCCATTGTCTCAGGCC  
\*1920 \*1930 \*1940 \*1950 \*1960 \*1970 \*1980

-----  
\*4820 \*4830 \*4840 \*4850 \*4860 \*4870 \*4880  
ACCGAAGCAATCACTCACTTTGCAGGCACACACAGCTCACACGGACGCCACACAGCAAGCAACACACAA  
CCGAAGCAATCACTCACAC AGGCACAAGCAGC CACACGGACGCCACACAGACA GCAA CCACAA  
GCCGAAGCAATCACTCACAC----AGGCACAAGCAGGCCACACGGACGCCACACAGACATGCAAGCCACAA  
\*1990 \*2000 \*2010 \*2020 \*2030 \*2040 \*2050

-----  
\*4890 \*4900 \*4910 \*4920 \*4930 \*4940 \*4950  
GTGCCGCAGAGTATGCCACACTTATTGCAATAACTCTTTGGGAAACCGAAGTAAGCGGCTGGGAAACT  
GTGCCGCAGAGTATGC ACACTTATTGCAATAACTCTTTGGGGA C GAAGTAAGCGGC GGGAAACT  
GTGCCGCAGAGTATGCTACACTTATTGCAATAACTCTTTGGGAGCTGAAGTAAGCGGCTGGGAAACT  
\*2060 \*2070 \*2080 \*2090 \*2100 \*2110 \*2120

-----  
\*4960 \*4970 \*4980 \*4990 \*5000 \*5010 \*5020  
CCCATCGCACTCCATCATCGCAATTAATCTATACGCCGCAATGACCAAAATTTGCCCACTCACGCTCACAC  
CCC TCGCAATTAATCAATACGCCGCAATGACCAAAATTTGCC ACTCACGCTCACAC  
CCCG-----TCGCAATTAATCAATACGCCGCAATGACCAAAATTTGCCCACTCACGCTCACAC  
\*2130 \*2140 \*2150 \*2160 \*2170 \*2180

-----  
\*5030 \*5040 \*5050 \*5060 \*5070 \*5080 \*5090  
TCCACAGTTGCCACACACACACACACAAACATGGGATTTGGGAATGCCAAACAGGACCACAAACAGCTC  
TCCACA T C CACACACACACA TGGG ACAACAGCTC

TCCACATT-----CGCACACACACACA----TGGG-----ACAAACAGTC  
\*2190 \*2200 \*2210

-----  
\*5100 \*5110 \*5120 \*5130 \*5140 \*5150 \*5160  
GTCCTGCTTTGCTGCTTTGGAAAGATACCGATACTTTAATGCCGGCTGTGTAGCACATCAAAATTAGCGCT  
GTCCTGCTT G AAAGATACCGATACTTTAATGCC TCAAAATTAGCGC  
GTCCTGCTT-----GAAAAGATACCGATACTTTAATGCC-----TCAAAATTAGCGC  
\*2220 \*2230 \*2240 \*2250 \*2260

-----  
\*5170 \*5180 \*5190 \*5200 \*5210 \*5220 \*5230  
CCCCCTGCTGCCGACAAACAATTTGTTGTCCAACTCTCTTTTTCGGATCAGAATCGAGA  
CCCT CTGCCGACAAACAATTT CTCTCTTTTTCGGA CAGA TCGAGA  
-----CCCT-CTGCCGACAAACAATTT-----CTCTCTTTTTCGGAGCAGACTCGAGA  
\*2270 \*2280 \*2290 \*2300 \*2310



5j)

CG15323:melanogaster (above), ananasae (below)  
Martinez/Needleman-Runsch DNA Alignment  
Minimum Match: 9; Gap Penalty: 1.10; Gap Length Penalty: 0.33

```

      110      120      130      140      150      160      170      180      190      100
CTTAAACAACAATTTCCTCCATTGSCAATAAATAACGCTTTAAATTTTTGGTGGCTTTTGTGCTTTTGGCTTTCTGTGCGCCATTTACACCAACAAGT
CTTAAACAACA   CCATT   AAAT  CGCTTTAAATTTTTGTT  G  TTTTTG  TTT  CTTTC  TT
CTTAAACAACA---CCATT-----AAATGCGCTTTAAATTTTTGTT--GTTTTTGGCTTTTAACTTTTCACTT-----
      910      920      930      940      950      960

```

```

      110      120      130      140      150      160      170      180      190      100
TGCATGTGTGCTGCT-----GTTGCC-----TGCCCCATTTTGGTATGCAATAAAT
TGTGTGCTGT   GTTGCC   TGCCCC  TTATGTATGCAATAAAT
---TGTGTGCTGTTTTTTCTCTTTTTTTCAGCAAGAGTTGCACGTTGCACGTTGCCGCGCATTTGGTGGTTGCCCCCATTTTGGTATGCAATAAAT
      970      980      990      100      110      120      130      140      150      160

```

```

      150      160      170      180      190      200      210
TGCGCCACTTGAGCAAAAGTAAATAAAGTACAATAAGTTTAAATATTTTACAGTTTTTTGGC-----TTGGCCAA
TGCGCCACTTGAGCAAAAGTAAATAAAGTACAATAAGTTTAAATATTTTACAGTTTTTTGGC-----TTGGCCAA
      170      180      190      200      210      220      230      240      250      260

```

```

      120      130      140      150      160      170      180      190      200      210
CAATTTGTGCAACGCTATT--CAGTTCATTGT--AGTTTGGCCACAGTTTGGCCGTTTGGCGGTTGTGCTGCGCAATTCGTACGTGACATGGCCAAC
CAATTTGTGCAACGCT  TT  CAGTTCATTGT  AGTT  CC  CAGT  GTTG  G  GCC  TGT  T  GTTGCTTACGTGACATGGCCAAC
CAATTTGTGCAACGCTGTTCCAGTTCATTGTGTAGTTGCCCGCAGTGGTTGCAG--GCCA-TGTTTT--GTTGCTTACGTGACATGGCCAAC
      9270      9280      9290      9300      9310      9320      9330      9340      9350

```

```

      130      140      150      160      170      180      190      200
AAGCCGCGAGTGGCGGAT-CGT---TGAGGGGAATGTGAAAGTGGATGTGGAC--GTGGAAGTGAAGCCCAAGCGCTGTGGTCTACCGCGCACAGGA
AAGCCGCGAGT  CG  GGA  CG  T  GG  A  G  G  AG  A  G  G  C  G  G  GG  AG  G  G  C  A  TTT  AG  A  AG  T
AAGCCGCGAGTCCGGGAGGGCGCCACCTCCCGCCA-GAGCGAGGGCAGGCAGCCCTGGGGAGGCGGGGAGGGCAGCGTGCATGGAATGTGGCAACGG
      9360      9370      9380      9390      9400      9410      9420      9430      9440

```

```

      140      150      160      170      180      190      200
TATACCCCTTCAG---AGGGCCATTACGGACTTAAACCCTGACTTTTCCCAATACAAT---TTGTGCTCTCAACAAGCGTTTGAAGCAATAGCTT
AT  TTTGAG  A  CCA  A  A  AAA  C  T  G  C  A  A  AA  T  T  TG  TC  A  TTT  AG  A  AG  T
ATTC---TTTCAGCCAAAACCAGCAAAAGCAGGGCAAGAGCAACATCCACACGAAAGTTCATCTGTTCCCTTTTATTCCTTTAAGGATAAAGG-T
      9450      9460      9470      9480      9490      9500      9510      9520      9530      9540

```

```

      150      160      170      180      190      200
TGAGGAGGCAC--ACATCCTTTCAGCCAAAGTAAACGCTATAGAAATCGGTTTAAATTTTAAAT--TTCAATTTTAA
T  A  C  G  A  ACA  TTTCA  G  AT  T  A  G  TA  GTTT  TTA  TTTAAAT  T  CA
TAACTCTGAAAAGCCAGCAG--TTTCATGACATTTTATGTTA-----GTTTTTAG--TTTAAATCCAGACACTCTGTTCTCTTAAAGTTTTTTAA
      9550      9560      9570      9580      9590      9600      9610      9620      9630

```

```

-----ACTC
A  TC
AATAAAGAAAAGGTTATAAAAATATTTCTTAAAGGATTCCTAAGATTCATAACCGGGACTTCCCTCTTATATATTTGATAAGTTTTTTATAAATAATTC
      9640      9650      9660      9670      9680      9690      9700      9710      9720      9730

```

```

-----TACAATGATT
TA  AA  T  ATT
TAGTATAGTATGCTAGTAATCTAGTATAGTACAATAAAAATAAACTACTCTCTTTTATTAATAAATTTAAAAACGGGTAATTTAAATTAAGTTCGA
      9740      9750      9760      9770      9780      9790      9800      9810      9820      9830

```

```

-----A-----TCTAAATACTG-AAGC--TCTGA
A
AATTTAAGAATTTAGCTGTAGCGACTACAGGCCCTTAAGCTAGTTATATACATCTTAATTAATACTAAGGATAAATCTAATAACTTCTCAATCAATCTT-
      9840      9850      9860      9870      9880      9890      9900      9910      9920      9930

```

```

      160      170      180      190      200
TTAAATTTGCGA-ATGCTTTGGGAGCCATTTAAGTCTGTGAGTTCGATTAAGTA--ATCTCAAAATTTAGTAAT--CCCACTCGCAACTCGAGC
TT  A  AT  G  A  T  T  A  G  C  T  T  A  G  TAG  T  AAAGT  AT  TACA  AA  TA  A  T  C  A  T  A  ACTC  A
TTCATATAGTACACATATTTAATAGACTCTTTGAAA---TAGAATATAAAAAGTTATATTTACAAAGATATTAATTAATTTAATTAAGACTCTAT-
      9940      9950      9960      9970      9980      9990      10000      1010      1020

```

```

1710 1720 1730 1740 1750 1760 1770 1780 1790 1800
AAAATCTCATAACGCCACTCAAAGCAACAACACT-----ACAACAAGACAACAAATTTGAGCTGCAAAATGAATTTAGCTGTTTC-ATTAGAGCTAAGAAT
A  A  T  T  T  C  TCAA  AA  AA  CT  A  AA  ACA  AA  TT  A  T  A  ATT  A  T  C  A  A  A  T  G  AT
ATATTTGTTTTTTTGTCTTGTCAACTAAAGAACCTTGTATGATGTTAAAACATAAAATTTATATTTACATATTTAGTCCAAATCTAGGATAATTTGGAT
      91030      91040      91050      91060      91070      91080      91090      91100      91110      91120

```

```

      1810      1820      1830      1840
TAAGTGGGGAG--TGCATCAGATGT--GATTTTAAATTTCAA-----
TAA  T  A  T  T  A  G  T  GA  AT  A  T  T  A
TAAATAGACATTTATAGCTTACAGTTCGGAATGAGCT-TTAGAAAAATTTAAAAAATTCGATATGAATATTCATCTAATCCTCCCTAGCTTAACC
      91130      91140      91150      91160      91170      91180      91190      91200      91210      91220

```

```

CACCAGGATACCCTGTAGCTGGAGCCTGCATTCGGGGCGCATACAAAAGCCCTACTGCGCACTGAGGCGAGCTGCTGTTCGAGCCAACTTAAAGT
      91230      91240      91250      91260      91270      91280      91290      91300      91310      91320
-----
CGTAAACAATTTCTTGGACAAGTGCATGCTCCGACACCCTCCGACATAGGCCACTACAGACATCTTGTATATATTTGAAATATACAGGATGAATA
      91330      91340      91350      91360      91370      91380      91390      91400      91410      91420

```

```

      1850      1860      1870      1880      1890      1900      1910      1920
-----CGCCACTGAGCTATGCTTGTAGCTAGCTATAATTTAAATTTAGCTTTCAAATTAATATTTATATATTTTTCGATGGCC
CGCCACTGT
TATATATCTGGAATTTGATGGCCACTTGA-----
      91430      91440      91450

```

```

      1930      1940      1950      1960      1970      1980      1990      1000      1010      1020
AGTGCAACGGAGTGGCAACTTACGCCAGTTCGATGGAGAACAACAACAGTATTTGCGCATATGTTATCCCTTGTGGAGCGAACTCAAAAAGCGTAGG
AGC  TCCCTTG  G  C  AAA  T  AAA  CG  AGG
AGC-----TCCCTTGTGAGGCCAAAAT-AAAATCCG-AGG
      91460      91470      91480      91490

```

```

      1030      1040      1050      1060      1070      1080      1090      1100      1110
GAATTTCTTGCACAATTTGCCATTTGCCCTTGGGGCCAGGAAGCCCTGCGAGAGGCTCTTACCCCTTTTATGACAGAC--CCCCCCCCCTGGAAA
T  TTCT  C  GGC  C  GG  CAG  A  AGAG  C  T  A  C  T  T  GACAG  C
---TGTTCG---CTGGGCTC---GACAGAA-----AGAGTCC--TGA--CATAATTAGACAGAAACCG-----
      91500      91510      91520      91530      91540

```

```

11120 11130 11140 11150 11160 11170 11180 11190 11200 11210
GGCTAAAATTAAGTTTTCAGTGTCTCATTTCGGAAGGAGGAGGATGAGCCAGGAGGAGGAGGAGGATGTAGTGGAGATGTCAGTGGCCCAAGGA

```

```

11220 11230 11240 11250 11260 11270 11280 11290
ATTCCGTAANTAGCCAGAAACATCAATTTCCATATGGCCAGAGCTTTTAAATAGTCTTTTCCATAACCAACATCAAAAGC-----GA-----
CATTCCATATGG  CAG  G  T  TT  A  T  GTC  T  C  ACATCAAAAGC  GA
-----ATTTCCATATGGTCAGGGGCTTAAAGTGGTGCCT-----CCACATCAAAAGCCTCTCGGCCAGACACACAC
      91580      91590      91600      91610

```

```

11300 11310 11320 11330 11340 11350 11360 11370 11380 11390
-----GTAATTTATGCTGCTCCTGAAACGGCCAAATCCCAACTCTCTTGGAGAAGGGTAGCTCACT--GATTTCCAGGGTGGATCACTCT
GCTAATTTATG  CCTCTG  A  CG  C  CC  AA  T  AGAA  GG  AGCT  AC  T  G  CCGA  G  T  A  T  AC  CT
ATCTGCTAATTTATG--CCTCTG-ACCSCA-----CACAAAATAAAAAAGGAAGCTAATCTCGGGCGAGCCCAAGTTTAAAT-ACCCT
      91620      91640      91650      91660      91670      91680      91690      91700

```

```

11400 11410 11420 11430 11440 11450 11460 11470
T-----TTAAACTGTATTAG-TACATTTAAATG-CACATATAAAAATTTAGAGGCTCTGAGTTACCTGATT-TTGGACATACCTTCTC-----TAGAGAG
T  TTA  G  A  T  G  T  A  C  ATC  TA  A  ATTAG  T  G  T  GC  AT  T  G  C  C  T  CAAT  T  G  A
TGCAGTTAAGTCAGCTCCGTATAGTGGGGCCACCACCTTATATTTATAGATATATAGCCGATCCGATATCTGAGCTCGCCGATTCATGAATTTGGCAA
      91710      91720      91730      91740      91750      91760      91770      91780      91790      91800

```

```

11490 11500 11510 11520 11530 11540 11550 11560 11570
AGAGAACGATTTTGAAAACCGAGGCGTAATGCTTACTGCAATC-TGAATATGCGCGATGCGCTTTTAAAGTGAAGAGACAGTA--GA-CG----ATAACAC
A  AA  TTTTG  A  A  G  T  C  A  T  C  ATC  T  A  T  A  C  A  C  AAGT  A  G  CA  T  GA  CG  AT  ACA
ATCAAAATTTCTTTGGCAAATAGAATCTGTACAAAATCCCATCTTCTTAACTTTAAAAACACCA--AAGTT-ATGCCAATTCGATCGTCTATGACAG
      91810      91820      91830      91840      91850      91860      91870      91880      91890

```



CTTTGCACTTT TT G A CAAT TT AC CGG T A CGG GG A  
CTTTGCACTTT---GTT-----GAAAAACAAT---TTAACCCGGT---ACCGG-----GGTATC  
94030 94040 94050 94060 94070  
-----  
13170 13180 13190 13200 13210 13220 13230 13240 13250 13260  
GCAGGCTCTTTATCGTACTTGCA--TTGTTGAGAGCAATCTTTGGCGAAATTAATAAATCGGCAACGGAAATTCGCAAGCCGTAAGAAGCAAGCGATG  
C C C T TCG A TTGC TTG GC TTC CAAGG A TTC G CA GC ATG  
TCCCCACAGGATTTGCG--ATTTGCTCTTC-----GCTTTC-----CAACCACTTC-----GCACGCAATG  
94080 94090 94100 94110 94120  
-----  
13270 13280 13290 13300 13310 13320 13330 13340 13350 13360  
CATAAGCTGTATAAAGCATATAAAGTATCCGAGGCTAAAATCCAGTACAGTCAATTTTTCATTAAGATCACACAACAATCCATTAATGCGATCATAT  
A T AT AGCA TGAT A G A A ACA CA T CA  
---AAATTAATTCAGCA---TGATGGTAAGACACAC---ACACACA---TACACAC---  
94130 94140 94150 94160 94170  
-----  
13370 13380 13390 13400 13410 13420 13430 13440 13450 13460  
GGTCATGCTTATCTGTAGAGGCAATTCACGTAAGGCACCAACAATTTGCAAACTGTCAACTTTGAAGACGCGATTCACCTGTGGCGCAATACGCTGT  
-----  
13470 13480 13490 13500 13510 13520 13530 13540 13550 13560  
GCAGCATGTATTTCAATTAAGCTACCCCGCCCCCCCCCTTTTTTTTTTCAACATACTATCCTAATAGTTTCTCTAGTGGTTGGCACTTTTGGCTTAGCGTT  
-----  
13570 13580 13590 13600 13610 13620 13630 13640 13650 13660  
CTGCTCTGCAATTTATGTGGCTCCTTAGCACTCGCTATCGTAACAATACTCGTTTCGTAATAAATAAACAATT--AATCGTTTGAATTTG--ATTCAATG-C  
ATAAATAACA AA C A A CA CA G C  
-----ATAAATAACACCCGAAACCCCAACCCCAACCCACACCCGAC  
94180 94190 94200 94210  
-----  
13670 13680 13690 13700 13710 13720 13730 13740 13750  
TCGAATGGATAA--TAGAAG--AGCTTATTTATTTGTTATT--ATTTATTTATTCGCTCAAGACCATAACA--TGATAATPACATTTGGTATTTTGGGAATGGTTA  
AAAT ATA T G G AG TAT A G ATT AT TA T TG G AG A CA T A ACA G AT TT  
ATAAATAAATAGCCCTTGTTCAGGTGATCAACGAAATTAATGATAAATCTGAGGACAGGGAACAATTCAGCAAAACCGCCGGAACGAAATCCCTTT  
94220 94230 94240 94250 94260 94270 94280 94290 94300 94310  
-----  
13760 13770 13780 13790 13800 13810 13820 13830 13840  
ATATATC--TATTCTTCGGCAAAATGAGCTTTTC--TCTATTCCACTC--TGATTACATCCAGGAGCGCA--TCG--AATAACAGCCTATTACATTCCTTC  
T T T TT TTC GCAA TAG T TTC T AT T A T TGA T T G CGA TCG AATAA A TAT CA TTC  
TTCCTGGGTTTTATTTCCGAAA--TAGTGTTCATGGGATATGGATTTATGAAATGGTTTTT--GCCATTTCGCAATAA--TATGGCACATATTC  
94320 94330 94340 94350 94360 94370 94380 94390 94400  
-----  
13850 13860 13870 13880 13890 13900  
-TCATTCAGGGCAATCAGATCTTTTCAGGTCTTTATGTCTC-----TATCGAAGCGCTCGGA-----  
T ATT AG G A CAGGT TTT C TATC G GCT GGA  
TTTTATTAAGTGAA-----CAGGTTTTTGGCTGGCATCGAAGCATCATTTTTTGTCAATTAATTCCTACCGGAGCTGGGAGAAGCCTTAAT  
94410 94420 94430 94440 94450 94460 94470 94480 94490  
-----  
13910 13920 13930 13940 13950 13960 13970 13980 13990  
-----CACATTTAAAGTATCTTCCCGGACTTGAAGACTCGGACCCCTTCCTCTCTGGGAGGACTTCACTTGGCTCTCAGAGTCTC  
C CA T CTTAAAGTATT TC TCG C T TCT CC TGT TCC  
TCTCTGATCCAGTCCATAAAGTATTTGTC-----ACCTGCTC-----TTTCTCTTCCCG--CATCTACTC  
94500 94510 94520 94530 94540 94550  
-----  
14000 14010 14020 14030 14040 14050 14060 14070 14080 14090  
GCCTGCAATGATCTTGTGTTTTAGATGCCCTCGCATCCGGCTTCGACTTCTGCCATTCTAAATTCAGTTGAGCTTGGATATTTGTTTCCCTAGGCA  
GCTC C TCG C T TCT CC TGT TCC  
GCTCTACGGC-----TCGCCCTGTCCCC-----TGCTCCCG-----  
94560 94570 94580  
-----  
14100 14110 14120 14130 14140 14150 14160 14170 14180 14190  
ATTGGTGAGACGAAAGTGAACTTTATTTTCAGTCGCAACGAAACTTCATGTTACAGTGTACGCGACATCCCACTTGTATCGAAATTCATGTGGATTTTC  
CAG GCAA GA  
-----CAGCGCAATGA-----  
94600  
-----  
14200 14210 14220 14230 14240 14250 14260 14270 14280 14290  
AATGGTTCCTTTGAAATAGGAATGCTCGAATATACAAGTTTGAATAATTTGCCATATATATATCATTTGAGCAATATATCCAATCTCGAACTTGTG

14300 14310 14320 14330 14340 14350 14360 14370 14380 14390  
TCTCACTTAAAAGACGGATTATTTATTTCTATATTAGACAAGATGATTATTTTGTGTTGTTTATAGTATATAGAATGTGCTAATTAACGAACCAATTAAG  
-----  
14400 14410 14420 14430 14440 14450 14460 14470 14480 14490  
TAATGCCATAATTAATTTATGCGTTAACAAGTCCATTCGATAAATAGTGTGACCAATAATGCTATGTTTGGTATATTTGATATTTGATCAGGACTGG  
-----  
14500 14510 14520 14530 14540 14550 14560 14570 14580 14590  
TTATCAACGGAGGTGTCAACTCTTTCGAATTTAAGCACCACAATTTGGCCTCGCCTCCACCACATGAAGATCACAGCTGGGAACGCTTTAATCTGTA  
-----  
14600 14610 14620 14630 14640 14650 14660 14670 14680 14690  
CTCATATCACATAGACGCTAGGAACGCTTCTGCTCTTCTTGGCCAGGATCTTGGTAAATATGTTGTGGCCCTTAATCACTGCCACCGTATTACTGAGA  
-----  
14700 14710 14720 14730 14740 14750 14760 14770 14780 14790  
AACCGTTCAGGAATCTTCAATTCATGCGCTCTCTGTTGATGGTGGATCTCACTGCAGCTTCAACTTCAAGATGTCAGGAAGCTTTGAGACAGATGGT  
-----  
14800 14810 14820 14830 14840 14850 14860 14870 14880 14890  
TCGTGATTAATACATTTCAATGCGATCTGGAAGCTCACTACTGCAATAGCCTCCATATTTATGAAAGCCAGCGGCTCTTGCATGACACCCCTG  
-----  
14900 14910 14920 14930 14940 14950 14960 14970 14980 14990  
CACCTGGACATAACCCAAAACCTTATGCTCGCGGACCCAGAGTTTCGTAGTCTCAACGCAATTTGATTTACTGATGGCGCCAGTCCGACTCTCTTCTAC  
-----  
15000 15010 15020 15030 15040 15050 15060 15070 15080 15090  
GAACTGCTGCGCTCGTCAAGTCAAGCTCTGCTGGGTTGCCGCTAATGCAACGGACTCAGTTAGGCTGGATTGTTTCTGGATCTGCACTGCCACG  
-----  
15100 15110 15120 15130 15140 15150 15160 15170 15180 15190  
ATGTCACGGACTCCATAGCTACTGGGCTACCTACAACATAAATAGAGAACAACACTCAGGATCAGGACGCTACGAGCTAGCTACGCTGCTCGCTT  
-----  
15200 15210 15220 15230 15240 15250 15260 15270 15280 15290  
GCATCCAGATGGCTTCTGCTGAGTATATGTTAACTGGAGATGCTTCTATTGGATTGAGTACGACCGAAACCAATTTATCGACCGAAGATATAAAGCAGA  
-----  
15300 15310 15320 15330 15340 15350 15360 15370 15380 15390  
ATCATAAAGCAGAAATCGACAGGCGAGGTGAGCTGCCCTTTAAGAAATTCGTGTGAAAATCTTCTTTTCAATGCTAATCTTACGCCGCAACATCCGCC  
-----  
15400 15410 15420 15430 15440 15450 15460 15470 15480 15490  
TTAAGCGTCAACAATTTCAACAATTTTAAATTTTTCATGCATCATGATGCTAAAAGTATTTTGACAATGGCGACCAACCAAAAAAAAAAAAAAGAACCC

-----  
          ¶5500  ¶5510  ¶5520  ¶5530  ¶5540  ¶5550  ¶5560  ¶5570  ¶5580  ¶5590  
GTCTGCAATCTTAAAAACATTCTATCGATATGATAGCGAAATATTAGAATTTTTTCTAAGCACTCCACCAGCTGAGAAAAGGGTATCTTTTAATCGAT  
-----  
          ¶5600  ¶5610  ¶5620  ¶5630  ¶5640  ¶5650  ¶5660  ¶5670  ¶5680  ¶5690  
TTATTTCGTTTCCACGCTTCTCCCTTTTCCCTAATTGAAACATPCACAGATCTCATTTCAATTTCTAAGCACTGAAAAATAAATTCATGTAGGAAAACGC  
-----  
          ¶5700  ¶5710  ¶5720  ¶5730  ¶5740  ¶5750  ¶5760  ¶5770  ¶5780  ¶5790  
TTCCCTTCGCGTGTTCATACTTTTCAACGAATCTAGCAACTTATAGTTTACAAAATTAATCGCTGTCAAATCGAATTCACGTCGAATCCACTTGGCAA  
-----  
          ¶5800  ¶5810  ¶5820  ¶5830  ¶5840  ¶5850  ¶5860  ¶5870  ¶5880  ¶5890  
CCACCACCTAATCGATATTATATAATAGTAAATAATAGTAGCAGTATTATATAACAGTATATAAATAAATAATCATATTATATGTAACATTATTATTATGTA  
-----  
          ¶5900  ¶5910  ¶5920  ¶5930  ¶5940  ¶5950  ¶5960  ¶5970  ¶5980  ¶5990  
ATATTTGTCATACATACGCAAATTAATTTAGTGTGAATGCTAATTAATTTACCTAATTTTCGGGCACCACTATCAAGGATATTTTCCACTGCTGCCCTCCC  
-----  
          ¶6000  ¶6010  ¶6020  ¶6030  ¶6040  ¶6050  ¶6060  ¶6070  ¶6080  ¶6090  
TTTCCACTCCAGTAGCAGTGGAAATTTAATTAATTTGTCACCTTTTGGCGGCTGACTTTGCGGTTAGCTGCTTAATAATCGCTCGGATTCAAAGCCCA  
          AAATTTAATTAATTTGTCACCTTTTGGCGGCTGACTTTGCGGTTAGCTGCTTAATAATCGCTC  CGA  TCAAAAGC  CA  
-----  
          AAATTTAATTAATTTGTCACCTTTTGGCGGCTGACTTTGCGGTTAGCTGCTTAATAATCGCTCAGCATCAAAGCTCA  
                          ¶4610  ¶4620  ¶4630  ¶4640  ¶4650  ¶4660  ¶4670  ¶4680  
-----  
          ¶6100  ¶6110  ¶6120  ¶6130  ¶6140  ¶6150  ¶6160  ¶6170  
TTTTGTTCTCAGGCCACGAAAGCAATCACTCACACTTGCAGGCACA---AGCAGCTCACACGGACGCACACAGACAAGCA-----AACCCAAG  
TTTTGTTCTCAGG  ACCG  AGC  CTC  CA  T  CA  ACA  A  CT  ACAC  GA  CACACA  ACA  CA  AACCCAAA  
TTTTGTTCTCAGGAAACCGCAGCGCTTCTCCAAATACATATACAAAATACGGACTAACACAGATACACACACACACACACACATACCGCTAACCCAAAA  
          ¶4690  ¶4700  ¶4710  ¶4720  ¶4730  ¶4740  ¶4750  ¶4760  ¶4770  ¶4780  
-----  
          ¶6180  ¶6190  ¶6200  ¶6210  ¶6220  ¶6230  ¶6240  ¶6250  
TGCAGCAGAGATATGCCACACTTATTGCAATAACTCTTTGGCGGAACCGAAGTAAGCGGCTGGGG---AAACTCCCATC-----  
          GCGCAG  GTATGC  ACACTT  TTGCAATAACTCTTT  CGG  AC  AA  AGCG  C  G  GG  AAA  TCC  T  
CGCCGACGGGTATGCTACACTTGTGCAATAACTCTTTACGGGACACAAAATAGCCCGGAGGAAAAGTCTGTGAAAAAGAAAAAGAAAAGGC  
          ¶4790  ¶4800  ¶4810  ¶4820  ¶4830  ¶4840  ¶4850  ¶4860  ¶4870  ¶4880  
-----  
          ¶6260  ¶6270  ¶6280  ¶6290  ¶6300  ¶6310  ¶6320  ¶6330  ¶6340  
-----GCATCCATCATCGCATTAATCATACCGCGCATGTGACCAAATATTTCGCCACTCAGCTCACATCCACAGTTGCGCCACACACACACA  
          GCATCCATCATCGCATTAATCATACCGCGCATGTGACCAAATATTTCGCCACTCAGCTC  
AGAAAGAGAGAGGCACTCATCATCGCATTAATCATACCGCGCATGTGACCAAATATTTCGCTCACTCACGCG-----  
          ¶4890  ¶4900  ¶4910  ¶4920  ¶4930  ¶4940  ¶4950  
-----  
          ¶6350  ¶6360  ¶6370  ¶6380  ¶6390  ¶6400  ¶6410  
CACACAACA-----TGGGAT-TGCGAATGC-----CAACAGGACCACAACAAGTC-GTCCGTCTTTGCTGCTTTGGAAGATACC--  
CACACAACA          GG  A  TG  A  GC  CAAACA  CC  CA  A  A  C  GC  GC  TGCTG  T  GAAAGATAC  
CACACAACAACAACAACACACGACACACAGCCACATGGCACGGCCCTCACAAACACATCCGCGATACACAGGCGGGC--TGCTGTATGCAAGATACTTT  
          ¶4960  ¶4970  ¶4980  ¶4990  ¶5000  ¶5010  ¶5020  ¶5030  ¶5040  ¶5050  
-----  
          ¶6420  ¶6430  ¶6440  ¶6450  ¶6460  ¶6470  ¶6480  ¶6490  ¶6500  
--GATACTTAAATGCGCGCTGTGTAGCACATCAAATAGCCGCTCCGCCCTGTGCCGACAACAACAAAT--TGTGTTGTC--AACACTCTCTT-----  
          GATACTT          TGTG  AGCACATCAAATAGCGC  CC  C  TGCC  AAAC  ATT  TGTGTT  CC  AACACTC  CTT  
CGGATACTT-----TGTGAAGCACATCAAATAGCGC--CTTCCAATGCCAAAACCAATCTGTGTTGGCCAACAAAACACTCACTTCTCACTT  
          ¶5060  ¶5070  ¶5080  ¶5090  ¶5100  ¶5110  ¶5120  ¶5130  ¶5140  
-----  
                          ¶6510  ¶6520  ¶6530  ¶6540  
-----TTTCGGATCAGAAAT--CGAGAGTCAAG--AGATTT--CCATCT-----GCCATC-  
          T  TC  AG  CAA  AA  TT  CC  GC  C  
TTCCAGGCTCGTGGTCCGATTTTACCTGGCTCTGCTCCATTCGAATGGCTGCAGCCAAATCCCTAACCTTTGACCCTCAAACAGAGCGAGCAAAAGGGG

          ¶5150  ¶5160  ¶5170  ¶5180  ¶5190  ¶5200  ¶5210  ¶5220  ¶5230  ¶5240  
          ¶6550  ¶6560          ¶6570  ¶6580  ¶6590  ¶6600  ¶6610  ¶6620  
TTCTGGACTTGCC---AGC-----TGC---AGTTAGA--CCAATGGCTCAGGATACGATGCTCAGCCAAAAGGCAACAATAACAATCCTATTG  
          T  GG  C  G  C  AGC          TGC  AG  AGA  CAA  C  G  ACGA  CTCAGCCAAAAGGCAACAATAACAATCCTATTG  
          TGAGGGGCAAGGCAAAAAGCAAAGCCAGTCCAGAGCCAGGCCAAGCCCACTGCCAACGACACTCAGCCAAAAGGCAACAATAACAATCCTATTG  
                          ¶5250  ¶5260  ¶5270  ¶5280  ¶5290  ¶5300  ¶5310  ¶5320  ¶5330  ¶5340  
-----  
          ¶6630  ¶6640  
ATTGTTGGCAACTATTG  
ATTGTTGGCAA  TATTG  
ATTGTTGGCAAGTATTG  
          ¶5350

5k)

CG32690:melanogaster (above), yakuba (below)  
Martinez/Needleman-Wunsch DNA Alignment  
Minimum Match: 9; Gap Penalty: 1.10; Gap Length Penalty: 0.33

110 120 130 140 150 160  
ATGTTTGGTGGTGAATATTCGTATCCCAAAA-----AAAAGGACAAAGCAATGTGGCC  
ATGTTGGTGGTGG G G TTCGATCCCAAAA AAAAGGACAAAGCAATGG GG C  
ATGTTTGGTGGTGGTGGTTCGTATCCCAAAAAGAAAAGAAAAGAAAAGGACAAAGTGGG--C  
110 120 130 140 150 160 170  
CCTCATTTCAGTTGGTGGGCGTGTGACAGATACAGTCATTTCAGCTATACAATCTCTTCAAATAAATGACCCAG  
CC CCT T CAGTTGGTGGGCGTGTGACAG TACAG CATTTCAGCT TACAATCTCTTCAAATAAATGACCCAG  
CGCCCTTCAGTTGGTGGGCGTGTGACAGTTCAGCCATTTCAGCTTACAATCTCTTCAAATAAATGACCCAG  
180 190 200 210 220 230 240 250  
1150 1160 1170 1180 1190 1200 1210  
TCAGAATTGGTTGAGGGAA---AAAAAATGAAGTTTTCAGTGGAGCAGGAGCGAGGTTTCCCGTACTGGCTGTCTTC  
TCAGAATTGGTTGAGGGAA AAAAATGAAGT TCAC GGAG AGGTTTCCC T GCCTGC TC  
TCAGAATTGGTTGAGGGAAACAAAATAATGAAGTTCAC-----GGAAGGTTTCCCTATGATGGCTGTCTTC  
260 270 280 290 300 310 320 330  
1220 1230 1240 1250 1260 1270 1280 1290  
CTG-----TTACATGTCAA---TTTCTTCCCTTTCGAGCGAAAATAAAGGAAACGACATAAAGGATTAGTGA-GCATTCTT  
CTG T ACATGTCAA TTCTTCCCTTTCGAG G AA AAGGAAACG ATAAGGATTAGT GCATT TT  
CTGCTCCCTACATGTCAATTTCTTCCCTTTCGAGTGGAAAATAAAGGAAACGGAATAAAGGATTAGTGGCGCATTTT  
340 350 360 370 380 390 400 410  
ATGCCCTCAATGGCTAGCATTGAATGCAATGAACATTGTGACTGGCGTCTTCTTTA--CGCAGTCATGCC---AAT  
AA AT CCCTC AATGCAATGAAC TTGTGAC GGCG CT CT TA CGCAGT AT C AAT  
ATACCTC-----AATGCAATGAACGTTGTGACAGCGCCCTCTATAATCGCAGTATTTCATAAATAA  
420 430 440 450 460 470  
1370 1380 1390 1400 1410 1420 1430  
AACATGGTGGTTGGG---TGACTACTTAA--AC-CTAAATGTAATCAATTTCAAAGTGACTAGATGAATTCACG  
AA AT T T T T TA AC CT ATGTA ATCCATT CAAAGTGTACTAGTAA  
AAAATAAATCCCAACTATATTTGTTAGTACTCTTCATGTAATATCAATTTGCAAAGTGTACTAGATGAA-----  
480 490 500 510 520 530 540 550  
1440 1450 1460 1470 1480 1490 1500 1510  
AAAAAAAACCCCAATATGAAAACACTACATCTAGTTGGCCGAGAAATAACTGTCAATTTTCTTTGGAACAAAAGT  
AA A CCGG AAT TGAARAAAC ACATC AGTTGGCCGAGAA TT CTGTCAAT TT TTT G A C A AA  
-----AATAGCCCAAAATCTGAAAACGACATCAAGTTGGCCGAGAACTTGGTGCATTAATTTTTTTCGACCAAAAAC  
560 570 580 590 600 610 620  
1520 1530 1540 1550 1560 1570 1580 1590  
TGATTTTGGACTTTAGGCTAGAGAAATTTTCATTTGCCCTCGACTCGAGCTACAAGCTA-GTGCATTTCTCGAACAAGT  
TGTA TTGA CT AG CTA AGAAATTTCAAT GCCTTCGAC CG C ACAAGCT GTC ATTT GAACAAGT  
TGTAATTTGAGCTACAGTCTACAGAAATTTTCATTTGCCCTCGACAGGCAACAAGCTGGGTCATATTTTGGAAACAAGT  
630 640 650 660 670 680 690 700  
1600 1610 1620 1630 1640 1650 1660 1670  
TCAGAAA-TGATCAAAAATTTTTGATTTAAAAGCTGACTAAACTAAAAGCTAAATAAAAGAACTACAGTCACTCCCTCA  
TACA AA TG ATC AATTT T GT AAAAAGTGAAGT T AAA TA A T A ANGTACA TCACC CAA  
TACAANAATGTAATCTAATTTCTCAATGTGAAAAGAACTGAGT---TGAANAATCAAT---AGAATACAAATCACCAAA  
710 720 730 740 750 760 770  
1680 1690 1700 1710 1720 1730 1740 1750  
AGCGCGTACACATCGTTACAGTACATTTCCCGACGAAATGTGGCCAGAAAGCTTGGTTCCTCGCCGAAATCCCGAGGAATC  
A GC TACAC TCGTTACAG TACA TG  
AAAGCATACCTCGTTACAGATACATGG-----  
780 790 800  
1760 1770 1780 1790 1800 1810 1820 1830

CAAACCGAGAAACAACGTTGATAATGATCGACAAAATCTACTACTCAATGAACACGATGCTCCATAACTGCGCGGACGA

1840 1850 1860 1870 1880 1890 1900 1910  
GCACCAATCGGGCAGCCAGTTCGCGAGGATCATCAAGCTGCAAAAACCCATGCACCTAGACTGTAAAAGTACACATGTGTTA  
A  
-----A-----  
9810  
1920 1930 1940 1950 1960 1970 1980 1990  
CAGCAGCATGCACAAAGCTTGAATTCCTCGCCGAAATCCGAGGAATCTAAGCCAGGAACCGCT--TGATCATGATTC  
CTTGATTCCTCGCC AATC GA GAATC AAGCCA AA A G T TGA A G TC  
-----CTTGATTCCTCGCCAAATCGGAAGAATCGAAGCCATCAATTCATGCTGTGACAGGCGTC  
9820 9830 9840 9850 9860 9870  
1000 1010 1020 1030 1040 1050  
G-----CCAGCTGGGAC-TAG-ATTTTCTACTCCTA-----TGAACAGATGCTT-----TCITATATACGAC  
G CCACG GGA TA AT T A AC A TG CGA G TT TC A CG C C  
GATTTCTCCAGGAGCGGAGATATCATATGAAACACTCATGGCTCGCCGCGACGTTTAAACGATGACACCAGCGCCCC  
9880 9890 9900 9910 9920 9930 9940 9950  
1060 1070 1080 1090 1100 1110  
-----TGAATGG-----TAAACAGCTGGTAAACA-CGAATTTGATCTG-----CGTGAATTTGG-----ATCGTTGACAGACT--  
TGG GG TA C AT CA C A TG A TG C T T TGG ATCGTT AA A GT  
AGTTTGGGGGCCATACATCCATCCATCCAGCTGCAATGAACACATCACTATGACTATCGTTCAA-ATGGTGC  
9960 9970 9980 9990 1000 1010 1020 1030  
1120 1130 1140 1150  
TA-CATAGCT--TACATTTTGCAGCT-----TTCT-AT-TGCCA-----  
TA CA A G T A T GCAC T TT CT AT TGC  
TACCACAAGAGTGAAGTAGCACCTCAACAGCTTGTGATATGCT--GCATACTGCGTACACACACACACACACAC  
1040 1050 1060 1070 1080 1090 1100 1110 1120 1130 1140 1150  
-----TTTAC  
TTTAC  
ACACACAACTTTAACAACGGCGTAATCGGCTGCCCAATTTGATTTGCTCGCATTAGACGCTTTTGTAAATGCGGTTTAC  
1120 1130 1140 1150 1160 1170 1180 1190  
1160 1170 1180 1190 1200 1210 1220 1230  
AATTAGTTTGGCAGTTCACACA-ATCTCTTTGATTATTGTAAGCCAATTAATCACTCTTACAGTGAACAATAAATAA  
AATTAGT TGCA TT ACACA AT TCCCT ATTATT T A C A AC A TTA AAT C A AAT  
AATTAGTACTGCCAATTTACACAAATTTCTT--ATTATTTTATCGT---AAACAATTA-----AATCAATAAT  
1200 1210 1220 1230 1240 1250  
1240 1250 1260 1270 1280 1290 1300 1310  
ACAGCTGTGATGAAGTGGACAATACAAAAC--CATACACTACAATAAACAACAAATCAGAATTTGAAGTGG  
CAG TGTA A ACA T CACA AAC CA CTA A AC A A CAGAATTTGAA TG  
GCAGAAATGACTACTC---ACACT--CACACAACAGAGCTAAT---ATACCTTATTGATGAGCAATTTGAATTTGA  
1260 1270 1280 1290 1300 1310 1320  
1320 1330 1340 1350 1360  
AC-----TGAAGTAACTTA-----TTACAC-----AGACACGAATGTTAATAAATAAATAAATAAATAA  
A T G GTA CTTA T ACAC A ACACGAATGTT TA CAATAACTCAAGTAA  
ATTTAACAACATCGGCTACTCTTATATCATTTCTTAACTGAAAACACGAATGTTGTAGCAAAATACAGTAATATC  
1330 1340 1350 1360 1370 1380 1390 1400  
1370 1380 1390 1400 1410 1420  
-AAC-----ACACAATAAATATTGTATAGCTCATCCC-AAAGAATAAATAAATAAATAAATAAATAA  
AAC ACACAATAAATAA A G CATCCC AAAGAA AAAA ATC TTA TTGA  
CACTCATTTCCCAATATGTACATACCAAATAAATAAAGGG---AGGCGATCCCAAAAGACAAAATAAATAAATAA  
1410 1420 1430 1440 1450 1460 1470 1480  
1430 1440 1450 1460 1470 1480 1490 1500  
GCTAAAATCGGCTTATTTGAATCTTGAATTTGAGATT--TAAATACATCTTAATCGGCTGCATCGGGTTCATGTCGCTG  
CTAAAATAAGCGCTTATTTGAATCTTGAATTTGAGATT TTAATACATCTTAATCGGCTGCATG TCGTGT  
GCTAAAATAAGCGCTTATTTGAATCTTGAATTTGAGATTGATTAATACATCTTAATCGGCTGCATG-----TCGCTG  
1490 1500 1510 1520 1530 1540 1550  
1510 1520 1530 1540 1550 1560 1570 1580  
ACTGT--TTGATGATGTTTGAATTTGTA--GTTTTTGTATTTTGTTTTTTTTTTTTTTAAATGAAAGGTGGTCTC

ACTG TTTGGATGTTT ATGTTTGA G TTTTGTATT TTTT TTTTAAATGAAAGGTGGTCTC  
ACTGTAATTTGGATGTTTAAATGTTTGTATGATTTTGTATTTC-----TTTCTTTTAAATGAAAGGTGGTCTC  
          \*1560          \*1570          \*1580          \*1590          \*1600          \*1610          \*1620  
  
          \*1590          \*1600          \*1610          \*1620          \*1630          \*1640  
GTTTTA---TGTATTTATGCAAGTATGTATAGTGGCATGATGATGTAATAACTAACATCAAGT-----  
GTTTA          TGTAT          TATGCAAGTATGTATAGTGGCATGATGTAATAACTAACATCAAGT  
GTTTGTAGTATGTAAGTATGTAAGTATGTATAGTGGCATGATGTAATAACTAACATCAAGTGGTTCGTTTTGTGA  
\*1630          \*1640          \*1650          \*1660          \*1670          \*1680          \*1690          \*1700  
  
          \*1650          \*1660          \*1670          \*1680          \*1690          \*1700          \*1710  
--AA--CG-TTTTCAAAAATTTGTGTTTCG-TTCATGGTGCATCACATGCATGGAGTACATAGTCAATGCTAAATGGT  
AA CG TTTTCAAAAATTTGTGTTTCG TCATGTTGCATCACATGCATGGAGTACA TAGTCAATGCTAAATGGT  
TGAATTCGTTTTTCAAAAATTTGTGTTTCGTTTCATGGTGCATCACATGCATGGAGTACAGTACATGCTAAATGGT  
\*1710          \*1720          \*1730          \*1740          \*1750          \*1760          \*1770          \*1780  
  
          \*1720          \*1730          \*1740          \*1750          \*1760          \*1770          \*1780          \*1790  
CGACAAGCTCAAAGCTTTGACAAAAGCTGGTTATATGTTGAAGATATATATACATATATATATATATATATATATAT  
CGACAAGCTCAAAGCTTTGACAAAAGCTTTGACAAAAGCTGGTTATATGTTGAAGATATATATATATATATATATATAT  
CGACAAGCTCAAAGCTTTGATAAAAGTGGTTTAAAGTTGAA-----ATATATA  
\*1790          \*1800          \*1810          \*1820          \*1830          \*1840  
  
          \*1800          \*1810          \*1820          \*1830          \*1840          \*1850          \*1860  
TATATATACATATATATA-----GATCGGGCTTAAGTACGGCCAATTTGCTTAAGAAGATGAAAATTAAGGAC  
TATATATACATATATATA          GA G G TTAAGTACGGCCAAT GCTTAA GATGAAT AGGAC  
TATATATACATATATATATATAGAGAGAGAGAGAGATTAAGTACGGCCAATAGCTTAAATGGATGAATGCAGGAC  
          \*1850          \*1860          \*1870          \*1880          \*1890          \*1900          \*1910          \*1920  
  
          \*1870          \*1880          \*1890          \*1900          \*1910          \*1920          \*1930          \*1940  
ACAATAAGT-TTACGGATTTCAATGTACTCGTTTTCGAAAAGGAAATTTGATTTCT-GAAATTTGTTTTATGAATTC  
ACAATAAGT TT ACC ATTTCAATGTACTCGTTTT GAA GAAATTTGATTTCT GAA TTG TTTATGAA TCT  
ACAATAAGTATTTCAAGCAATTTCAATGTACTCGTTTTGAAAGGAAATTTGATTTCTGAAATTTGTTTTATGAATTC  
          \*1930          \*1940          \*1950          \*1960          \*1970          \*1980          \*1990          \*2000  
  
          \*1950          \*1960          \*1970          \*1980          \*1990          \*2000          \*2010  
G----TTGTATTCGGTTTCTGTTTCTCCTTAAATAGTATGTTTAAATGCTAACCAAAAATATATCTCCAGATACA  
TT TATTC GTTT CTGTTCTC TTTTA T TAGTAA TTTTAAATGCTAACCAAAAATATATCTCCAGATACA  
GCTTTTATATCTGTTACTGTTTCTCCTTTTATTTAAGTAAATTTTAAATGCTAACCAAAAATATATCTCCAGATACA  
\*2010          \*2020          \*2030          \*2040          \*2050          \*2060          \*2070          \*2080  
  
          \*2020          \*2030          \*2040          \*2050          \*2060          \*2070          \*2080          \*2090  
TTAATATACTACTTAGAGAACATCAATTAACCTAAATAGTCTTGGCAGTATTTTTGTCATATTATATTTTCATAATC  
TT ATAACTACTTAGAGAACATCAATTAACCTAAATAGTCTTGGCAGTATTTTTGTCATATT ATAT TCATAATC  
TTTTAATTACTACTTAGAGAACATCAATTAACCTAAATAGTCTTGGCAGTATTTTTGTCATATTCAATATACATAATC  
\*2090          \*2100          \*2110          \*2120          \*2130          \*2140          \*2150          \*2160  
  
          \*2100          \*2110          \*2120          \*2130          \*2140          \*2150          \*2160  
CG10T          \*2110          \*2120          \*2130          \*2140          \*2150          \*2160          \*2170  
GTTTTGCTTTAAAATAATGCTCTTTTCTTTTTCGCGCGCTATACATATATTTTCTGGCTAGCTCAAGTCTTCC  
CGTTC GCTTTAAAATAATGCTCTT CTTTTCC CG TATACATATATTTATTT TTGCTAGCT CA TTT  
GTTTTGCTTTAAAATAATGCTCTT---CTTTTTCCATCGTTATACATATATTTATTTTTTGGCTAGCTCAAGTCTTCT  
\*2170          \*2180          \*2190          \*2200          \*2210          \*2220          \*2230  
  
          \*2180          \*2190          \*2200          \*2210          \*2220          \*2230          \*2240  
TTCGATTTGATATATACAGATATTTTTCGCATTAATACGCAATTTCTCCTATGATAAATATACATA-----  
TTCGATTTGATATATACAGATATTTTTCGCATTAATACGCAATTTCTCCTTA ATAATATACATA  
TTCGATTTGATATATACAGATATTTTTCGCATTAATACGCAATTTCTCCTTACATAAATATACATATATACATATA  
\*2240          \*2250          \*2260          \*2270          \*2280          \*2290          \*2300          \*2310  
  
          \*2250          \*2260          \*2270          \*2280          \*2290          \*2300          \*2310          \*2320  
--TATATATATATATGATATATATATATATATAGTATATTTATATTCATTTATTAAGTTAGGCATGTCATATC---TTGT  
TATATATATATATG TATATATAGTATATTTATATTC TT TAAAGTTAGGCAT TCATATGC TTGT  
CTTATATATATATATG-----TATATATAGTATATTTATATTC---TTTTAAAGTTAGGCATATCATATGCTTTTGT  
\*2320          \*2330          \*2340          \*2350          \*2360          \*2370          \*2380          \*2390  
  
          \*2330          \*2340          \*2350          \*2360  
ATTTCAATATAATTTCTTTCAATTTCCCAACCCCTTTTCCACCGC-----  
ATTTCAATATAATTTCTTTCAATTTCCCA CCCC TTTTCC CGC  
ATTTCAATATAATTTCTTTCAATTTCCCA---CCCCCTTTCCCGCGCACTTCGGTGCATCATTTCCCGAGTGCATCAAGTGGCATC  
\*2400          \*2410          \*2420          \*2430          \*2440          \*2450          \*2460          \*2470  
  
          \*2370  
-----ACA  
          AC  
ACCTGAACGCCACCTTGGCGGGGACACGCACCTTGGCGCTTCATATTTGGTGTGTTCTTACG

51)

CG32690:melanogaster (above), erecta (below)  
Martinez/Needleman-Wunsch DNA Alignment  
Minimum Match: 9; Gap Penalty: 1.10; Gap Length Penalty: 0.33  
  
          \*110          \*120          \*130          \*140          \*150          \*160          \*170  
ATGTTTCTGCTGGTGAATATCGTATCC-----AAAAAAAAAGGACAGACAAATGTTGGCCCGCCCTATTCAAGT  
ATGTTTCTGCTGGG GA ATCG ATCC AAAAAAAAAAGGACAGACAAAG CCCT CT T CAGT  
ATGTTTCTGCTGGGCA--ATCGCATCCCAAAAAAAAAAAAAAAAAAGGACAGACAAATGGGG--CCCTACTTCCAGT  
          \*180          \*190          \*200          \*210          \*220          \*230          \*240          \*250  
TGGTGGGCGGTGACAGTACAGTCATTTCAGCTATACAATCTCTCAAATAAATTAAGCCACGTCAGAATTTGGTTGA  
TGTTGGGCGGTGACAG TACG CATTTCAGC T CAATCTTCAAATAAATTAAGCCACGTCAGAATTTGGTTGA  
TGGTGGGCGGTGACAGTTACAGCAATTCAGCATTCGAATCTCTCAAATAAATTAAGCCACGTCAGAATTTGGTTGA  
          \*180          \*190          \*200          \*210          \*220          \*230          \*240          \*250  
  
          \*160          \*170          \*180          \*190          \*200          \*210          \*220  
GGGGAIAAAATAAAGGATTTCACTGGAGCAGGAGCAGGATTTCC--CGTACTGGCTGCTTCCCG---TTACATGT  
GGGGAIAAAAA TGAAGGT TCAC GGAGCAGGATT TCCC CGTA GGCTGTC TCCGT T ACATGT  
GGGGAIAAAAA--TGAAGGTTCCAC----GGAGCAGGTTCTCCCTACGTA--GGCTGCTCTCCGCTCCACATGT  
\*260          \*270          \*280          \*290          \*300          \*310          \*320  
  
          \*240          \*250          \*260          \*270          \*280          \*290          \*300  
CAATTTCTTCCCTTTGCGCGAAATAAAGGAAACACATAAAGGATTAGTGA-GCATTCTTAAGCCCTCAATGGCTAG  
CAATTTCTTCCCTTTGCGCGAAATAAAGGAAACACATAAAGGATTAGTGA GCATT T AT CCCTCAAT CCT G  
CAATTTCTTCCCTTTGCGCGAAATAAAGGAAACACATAAAGGATTAGTGGGCAATTTCAATCCCTCAATAGCTTG  
          \*330          \*340          \*350          \*360          \*370          \*380          \*390          \*400  
  
          \*310          \*320          \*330          \*340          \*350          \*360          \*370          \*380  
CATTGAATGCAATAAAGAACATTTGAGTGGGCTCTTCTTTACGAGCTCATGCGCAATAACATGGGTTTGGGTTGCTA  
CATTGAATGCAATA GAAC TTG T CTTT CGCAT AT C A A A A  
CATTGAATGCAATGAGAACGTT-----TCCTTTCCGAGTTATTTCAATCAAAA-----TATGC  
\*410          \*420          \*430          \*440          \*450          \*460  
  
          \*390          \*400          \*410          \*420          \*430          \*440          \*450          \*460  
TAAACTAAATGTAATCCATTTCAAAGTACTAGATGAAATTCACGAAAAAAACCAGCAATATGAATAACTAC  
A A CTAATGT AA ATCCATTTCAAAGTACTAGATGAAATTT AC AAAAA AACCC AAT TGA AAA TAC  
CACA-CTAAATGCAATATCCATTTCAAAGTACTAGATGAAATTTAAC--AAAAATAACCCCAATCTGATAAATC  
\*470          \*480          \*490          \*500          \*510          \*520          \*530          \*540  
  
          \*470          \*480          \*490          \*500          \*510          \*520          \*530          \*540  
ATCTAGTTGGCGGAGAAATTAACGTGATTTTTCTTTTGGAAACAAAAGTATTGTTGACCTTTAGGCTAGAGAAATTT  
ATC GTGGCGGAGAA TTA CTGTCATT TTT TTTGGAAACAAA TTGTA TT GACCT AGGC A AAAAA  
ATCAGGTTGGCGGAGAAATTAACGTGATTTTTCTTTTGGAAACAAAATTTGATTTAGGCTTACAGGCACGCAAAATTT  
\*550          \*560          \*570          \*580          \*590          \*600          \*610          \*620  
  
          \*550          \*560          \*570          \*580          \*590          \*600          \*610          \*620  
CATTGCTTCGACTGAGCTACAGTACTAGTGCATTTCTCGCAACAGTTACAGAAATGATCAAAATTTTTTCAGTAA  
CATTGCTTCGAC G GC ACAA C GTGC ATTTCT GAA AGTTCAA TCAAAATTTT GT AA  
CATTGCTTCGATGAGCAACAAACCGGTGATTTCTGGAATAAGTTACAAAAAAATTTCAAATTTTTTCACTGTGAA  
\*620          \*630          \*640          \*650          \*660          \*670          \*680          \*690  
  
          \*630          \*640          \*650          \*660          \*670          \*680          \*690          \*700  
AAAAGTACTGAACTAAAGTAACTAAAAAAAGTACAGTCACTCAAGGCGGCTACACATGTTACAGCTACATTCGCGG  
AAAAGTGAGTA T AA TA AC AAAAGTACAGTCAAC AA G GTAC C TCGTTACAGC TACA TGC G  
AAAAGTGAGTA---TGAATAACACC---AAAAGTACAGTCAACAAATGGGGGTAGCCTGTTACAGCTACAGTGTG  
\*700          \*710          \*720          \*730          \*740          \*750          \*760          \*770  
  
          \*710          \*720          \*730          \*740          \*750          \*760          \*770          \*780  
ACGAAATGTCGGCAAGGCTTGGTTCCTCGCCGGAATCCGAGGAATCCAAACAGGAAACACGTTGATATGATCGAC  
AC AAATGTCGGCAC GCTTTC TCTCCT CCC AATCCGAGGAATC AA CCAG A AC A GTTG AAG G C G  
ACAAAATGTCGGCAAGGCTTGGTTCCTCCACCAAATCCGAGGAATCAAGGAGCAAGCATGTTG---AAGCGGGT  
\*780          \*790          \*800          \*810          \*820          \*830          \*840          \*850  
  
          \*790          \*800          \*810          \*820          \*830          \*840          \*850          \*860  
AAAATTTACTACTACTCAT-GAACAGATGTCCATAACTCGCGGAGGAGCAACCAATCGGCGACCCAGTTCGGAGGATC  
A TC C CT AT GA CA GAT C C A AACT C G A CA CAAT GG C AG T



5m)

CG32690:melanogaster (above), ananassae (below)
Martinez/Needleman-Wunsch DNA Alignment
Minimum Match: 9; Gap Penalty: 1.10; Gap Length Penalty: 0.33

Genomic alignment for CG32690 showing coordinates from 970 to 1150. The alignment includes reference sequence lines and corresponding alignment lines with gap markers (---) and match markers (|). Key features include a 5' UTR, a start codon (ATG), and a 3' UTR.

Genomic alignment for CG32690 showing coordinates from 9710 to 11510. This section continues the alignment from the previous block, showing the continuation of the reference sequence and alignment lines with match and gap markers.



-----  
\*2570  
-----  
CCCGTACT  
C G TACT  
-----  
CCACCCAGACCCCTGGCATTTCGCTACTGCTCCTTCTTCCATTCTCGCAGAAAGGCAATCAGAGTAATGG  
\*1450 \*1460 \*1470 \*1480 \*1490 \*1500 \*1510 \*1520  
-----

-----  
CTTTAATGGACACTGATTGTCTGGCTGGGAGGCGACTCCAATTGGAATAGTTCAGCACCTGTCACTTTAATAACTGAGT  
\*1530 \*1540 \*1550 \*1560 \*1570 \*1580 \*1590 \*1600  
-----

-----  
TTTTGCCACTCTCGAAATGATCAAGTTGGCAGGCGCCAGCCTAGGAGCCTAGGGAGTTCGAGGAAAAGTTTCAAAAT  
\*1610 \*1620 \*1630 \*1640 \*1650 \*1660 \*1670 \*1680  
-----

-----  
CGTAGTAGGCAGCCCTCCCTACAAGCTATAAAATCGGAGCGCCGCTGAGAGCTTCATTTCGCTCCGGACAGGC  
\*1690 \*1700 \*1710 \*1720 \*1730 \*1740 \*1750 \*1760  
-----

-----  
CAGTTCGGACGGCAATCAGGAAAATAAATCTATAATCAAAATCAAAAAGTCTCGAAAACCTCGTAAGATTCAAAA  
\*1770 \*1780 \*1790 \*1800 \*1810 \*1820 \*1830 \*1840  
-----

-----  
GCAAAAAAAAAAGTAAAGCTAGGAAGTGAATTCGAAATTTGATGAAAAATTTGTCAAGTTATATTTCCCGCAGTGGCG  
\*1850 \*1860 \*1870 \*1880 \*1890 \*1900 \*1910 \*1920  
-----

-----  
CGCGCCAAAGATGTCTGCACCTCGGATGCTCCCGGTGCAAGACCGATGCATCTGGACTCTAGCGTGTGATGGTCTCG  
\*1930 \*1940 \*1950 \*1960 \*1970 \*1980 \*1990 \*2000  
-----

-----  
GCTTCGCCAGCGGCGACCGAGCCCGGATAATGAGCGGGACCGCGAGGTGGTCCGGCTACGGCATCAACGAGCCCGCCATC  
\*2010 \*2020 \*2030 \*2040 \*2050 \*2060 \*2070 \*2080  
-----

-----  
TACTTCGACAGCCAGGACTGCCCTTTCGGCCATCCGCTTCGGGGAGCTCACCCGGAGGTCTGGGCCATCCGGCGAGAA  
\*2090 \*2100 \*2110 \*2120 \*2130 \*2140 \*2150 \*2160  
-----

-----  
GGAGCTGGGCGACTGGAAGAAGCTGTCTGCTGTGCGAGAAGAAGATGCTGTACCGGCATAGCTTCTGCCAGACCTACGCAG  
\*2170 \*2180 \*2190 \*2200 \*2210 \*2220 \*2230 \*2240  
-----

-----  
AGTTCGAAGTTTCAACCCGGACTGGAAGCTCGTCTTGGGCCTCGGATTGTGGTCACTGGCGATCGGCTGCCCATCACC  
\*2250 \*2260 \*2270 \*2280 \*2290 \*2300 \*2310 \*2320  
-----

-----  
GTGATAAGCAAGCTGAACCTTGTACAACGATCCGCCGAGAGCGTTCGAGGAGGACCGCGCTCTGCCAGCTGGCCGGAAT  
\*2330 \*2340 \*2350 \*2360 \*2370 \*2380 \*2390 \*2400  
-----

-----  
\*2580 \*2590 \*2600 \*2610 \*2620  
-----  
GGCTGTCTTCCCTGTACATGTCAAATTTTCCCTTTCGAGGAAATAAAA  
GGCTGTCTTCC AA T T T CGAGCG AA A  
CATTTCAGTGCAAATGAACCCGATCACCGGGCTGTCTTCC-----AAGTGGTGC---TACGAGCCCAACCGAT  
\*2410 \*2420 \*2430 \*2440 \*2450 \*2460  
-----

-----  
\*2630 \*2640 \*2650 \*2660 \*2670 \*2680 \*2690 \*2700  
-----  
GGAAACGACATAAAGATTAGTGAGCAATCTTATGCCCTCAATGGCTAGCATTGAATGCAATA-AGAA-CATTGAGACTG  
GGA A A GG AGTG G A TC A GCC T C GCA ATGC A A A AA CATT AC  
GGA-----AGTAGGG---AGTG-GGAGTCGGAAGCCCG---TTCACGCGAC---ATGCCAGACACAGGATTTCCAAACA  
\*2470 \*2480 \*2490 \*2500 \*2510 \*2520 \*2530  
-----

-----  
\*2710 \*2720 \*2730 \*2740 \*2750 \*2760 \*2770 \*2780  
-----  
GCGTCTCTTTTACGCACTCATGCCAATAACATGGTGTGGGTGGTACTCTAAACCTAAATGTAATTCATTTTCAAA  
C TACG AG A G CAATA TG TG T G GG T A CCTA T AA T C TTTC  
CA--CAGGATACG-AGCGAGGACAATATGCTGATGATCCGAGGA--TGATAGCCTAT---TGAATGCGGTTTCG--  
\*2540 \*2550 \*2560 \*2570 \*2580 \*2590 \*2600  
-----

-----  
\*2790 \*2800 \*2810 \*2820 \*2830 \*2840 \*2850 \*2860  
-----  
GGTGACTAGATGAATTTACGAAAAAAGCCCAATATGAAAACTACATCTAGTTGGCCGAGAAATTAACGTGTCAT  
TTTC TAT A AA TACA  
-----  
TTTCG-----TATTGACAAGTACA-----  
\*2610 \*2620  
-----

-----  
\*2870 \*2880 \*2890 \*2900 \*2910 \*2920 \*2930 \*2940  
-----  
TTTTTCTTTTGGAAACAAAAGTTGTATTTTGACCTTTAGGCTAGAGAAATTTTCATTTGCTTCGACTCGAGCTACAGACTA  
-----

-----  
\*2950 \*2960 \*2970 \*2980 \*2990 \*3000 \*3010 \*3020  
-----  
GTCCGATTTCTCGAACAGTTACAGAAATGTATCAAAATTTTTTCAGTTAAAAAAGTGAATAACTAAAGTAAACTAAA  
-----

-----  
\*3030 \*3040 \*3050 \*3060 \*3070 \*3080 \*3090 \*3100  
-----  
AAAAGTACAGTCACTCAAAGCCGCTACACATCGTTACAGCTACATTCGCCAGCAAAATGTCGGCACAGGGTTGGTTCTCT  
-----

-----  
\*3110 \*3120 \*3130 \*3140 \*3150 \*3160 \*3170 \*3180  
-----  
CGCCCGAATCCGAGGAATCCAAACCGAGAAACAACGTTGATAATGATCGACAAAATTACTCACTACTCAATGAACAGATG  
-----

-----  
\*3190 \*3200 \*3210 \*3220 \*3230 \*3240 \*3250 \*3260  
-----  
CTCCATAACTGCCGCGAGCACCAATCGCGGACCCAGTTCGCGGAGGATCATCAAGCTGCAAAAACCCATGACACTAGACT  
CAAGCTGCAA CC T T G A  
-----  
CAAGCTGCAA-----CCGTTGTTTCGAT-----  
\*2630 \*2640  
-----

-----  
\*3270 \*3280 \*3290 \*3300 \*3310 \*3320 \*3330 \*3340  
-----  
GTAAAAGTACACATTTGTTACAGCAGCAGTGCACAAAGCTTGTATTCCTCGCCGGAATCCGAGGAATCAAGCCAGGAAAC  
AA A CA T C CA CA GC AA T A C CGA T C A G ATC G C  
---AACCCATCACTATCCCGCCATCAA--GCTAAACTATCAACAGCATATTCGATTTGCCAAGGATCGTTATATGTT--CT  
\*2650 \*2660 \*2670 \*2680 \*2690 \*2710 \*2720 \*2730 \*2740 \*2750 \*2760 \*2770 \*2780 \*2790 \*2800 \*2810 \*2820 \*2830 \*2840 \*2850 \*2860 \*2870 \*2880 \*2890 \*2900 \*2910 \*2920 \*2930 \*2940 \*2950 \*2960 \*2970 \*2980 \*2990 \*3000 \*3010 \*3020 \*3030 \*3040 \*3050 \*3060 \*3070 \*3080 \*3090 \*3100 \*3110 \*3120 \*3130 \*3140 \*3150 \*3160 \*3170 \*3180 \*3190 \*3200 \*3210 \*3220 \*3230 \*3240 \*3250 \*3260 \*3270 \*3280 \*3290 \*3300 \*3310 \*3320 \*3330 \*3340 \*3350 \*3360 \*3370 \*3380 \*3390 \*3400 \*3410 \*3420 \*3430 \*3440 \*3450 \*3460 \*3470 \*3480 \*3490 \*3500 \*3510 \*3520 \*3530 \*3540 \*3550 \*3560 \*3570 \*3580 \*3590 \*3600 \*3610 \*3620 \*3630 \*3640 \*3650 \*3660 \*3670 \*3680 \*3690 \*3700 \*3710 \*3720 \*3730 \*3740 \*3750 \*3760 \*3770 \*3780 \*3790 \*3800 \*3810 \*3820 \*3830 \*3840 \*3850 \*3860 \*3870 \*3880 \*3890 \*3900 \*3910 \*3920 \*3930 \*3940 \*3950 \*3960 \*3970 \*3980 \*3990 \*4000  
-----

-----  
\*3350 \*3360 \*3370 \*3380 \*3390 \*3400 \*3410 \*3420  
-----  
ACGTTTGTATGATGATTCGCCAGCTGTGGGAC--TAGATTTTTCACCTACCTATGAACACAGATGCTTCTTTATACGACACT  
A SFT AT A T CAC TGT AC FA A TTT CACT CC AC CGA G CT ATAGC A  
ATGTTCAATGTACACTGTACAC-TGTAC-ACCTTACACTTTACACTGGCCCCACAC-CGAGGACACTACATACGCTATG  
\*2730 \*2740 \*2750 \*2760 \*2770 \*2780 \*2790  
-----

-----  
\*3430 \*3440 \*3450 \*3460 \*3470 \*3480 \*3490  
-----  
GGATGGTA-----ACACGATGGTAACA--CGAATTGAT-ACTCGGTTGATTGGATCGTTGAACACAGCT--TACATAC  
GGA A ACAC TG A CA C A TGA ACTG TG T C T AACA A T T A C  
GGACACCACATGCAACTCTGTAAACCGCCAGCTGAGGACTGAC-TGCTCACAGCCCAATAAACAATTTGTTTACTC  
\*2800 \*2810 \*2820 \*2830 \*2840 \*2850 \*2860 \*2870  
-----

-----  
\*3500 \*3510 \*3520 \*3530 \*3540 \*3550 \*3560 \*3570  
-----

**GTTCACATTTGCGCGTTTCTCATTTGCGGATTTACAATAGTTTTGCCAGTTCACACAATCTCCCTTTGATATTGTAAGCCA**

TTACA T T C C A TG T AC A TT C CAC CA C TG TA A GCCA  
ATTACATTTGCGCCAAACAATG----TAACACCGCCCTTACA----CACCCAGGACACCCGCGTACACATGCCA  
\*2880 \*2890 \*2900 \*2910 \*2920 \*2930 \*2940

**ATTAATACACTTACAGTGACAATACT-AAAATACAGCTGTGTA--TGAAAGTGGACAATACACAAAACCATACACTACA**

TAA AC T CA A AATA T AA ATA A CT A T A T ACAATA ACA A CATA AC CA  
CGTAAGAC-ATTGGCCACGAGAATATTGAATATAATACTCGACACATTCAGTCTCTACAATAGACACATGCATATACCTCA  
\*2950 \*2960 \*2970 \*2980 \*2990 \*3000 \*3010 \*3020

\*3650 \*3660 \*3670 \*3680 \*3690 \*3700 \*3710 \*3720  
**ACTAAAACA--AAACAAATCAGAATTTGAAAGTGGACTAGAATAACACTTTATACACAGACAGCGAAATTTATA-AC**  
ACA A C A CA TT AA GGAC GAA T C T ACACA CACC A T A C A  
CTCCGACACAGTACGCCCAACATGTTTATAACCGGACATGAATTTGGCATCCACACACTCACCACACTTCGCACAC  
\*3030 \*3040 \*3050 \*3060 \*3070 \*3080 \*3090 \*3100

\*3730 \*3740 \*3750 \*3760 \*3770  
AAATACACTGAAACACACAATA--AAA-TATTGTATACG-----TCATCCCAA-----  
TAC C A A AA TA A TA T A C TCAT CAA  
TCTTACGCAATTTGTAATAATTAGGATAAATAACGACACTCGTACAACTCATCAAACTGTCTACTGTCACTGCACACTG  
\*3110 \*3120 \*3130 \*3140 \*3150 \*3160 \*3170 \*3180

-----AGATAAA-----  
-----AGATAAA-----  
TCACTGTCACTCGCAGGCAATTCGGTTCCTTCTCTGGATTTGAAGAAGCGTGAACCTGTGTCGGAATAAAGGGCAT  
\*3190 \*3200 \*3210 \*3220 \*3230 \*3240 \*3250 \*3260

\*3780 \*3790  
-----AAACATCGATT-----  
AA ATCGA T  
TATAAGATCGAATAAAGTGCCCTTACTTTGTATCTTATACTTTGATCTTTATGTGTATATACACCCCTCCCGAAAGAA  
\*3270 \*3280 \*3290 \*3300 \*3310 \*3320 \*3330 \*3340

\*3800 \*3810 \*3820 \*3830 \*3840  
-----AATGAGCTAAAAGCGCTTTATGCAACTTGAATGAGATTT--TAATAC-----  
AA TGAGCTAAAAGCGCTTTATGCAACTTGAATGAGATTT TAATAC  
CTCCCGCCAGAAAGTGAGCTAAAAGTGCCTTTATGCAACTTTGAATGAGATTTGTTAATACATAGAATGCATGTAC  
\*3350 \*3360 \*3370 \*3380 \*3390 \*3400 \*3410 \*3420

\*3850 \*3860 \*3870 \*3880  
-----ATCT-----TAATCGGCTGCATGCGGT--TCATGTGCG-----TGACTG-----TTTTGGATGTG  
AT T TAA T A C AT C T T AT TC TGACTG T T T GGATGTG  
GATGTACGATCTGTGTGTATACAATAAATATCAATATCAATATAATCTTCTGAGTGACTGTACTTGTCCGGATGTG  
\*3430 \*3440 \*3450 \*3460 \*3470 \*3480 \*3490 \*3500

\*3890 \*3900 \*3910 \*3920 \*3930 \*3940 \*3950  
TTTTGATTTTGTAGTTTTTGTATTTTGTTTTTTTTTTTTTTAATGAAAGGTGGTCTCGTTT-----T  
TTTTG ATGTAAGGTGGTCTCGTT T  
TTTTG-----ATGTAAGGTGGTCTCGTTCTAGGATGTAACAT  
\*3510 \*3520 \*3530 \*3540

\*3960 \*3970 \*3980 \*3990 \*4000  
ATGTATTT--TATGC-----AAGTATGTATAGT-----GCCATGTATGTATGTAATAC  
ATGTAT TATGC AAGTATGTATAGT GG ATGTATGTATGTAATAC  
ATGTATGTGTATGCGCATGAAAGTATGTATAGTATGACACATCGTGTGAAGTACATATGCGGTATGTATGTATGTAATAC  
\*3550 \*3560 \*3570 \*3580 \*3590 \*3600 \*3610 \*3620

\*4010 \*4020 \*4030  
TAACTACAGTTAACCGT-----TTTTCAAATTTTG  
TAACTAT GTT C TTTCAAATTTTG  
TAACTACCGTTCCGTTCAATATTTTTGTATGAATTCCTTCGTTTGGCTCTCGTTTGGTGGTTTGGTTTCAAATTTTG  
\*3630 \*3640 \*3650 \*3660 \*3670 \*3680 \*3690 \*3700

\*4040 \*4050 \*4060 \*4070 \*4080 \*4090 \*4100  
T-----GTTTCGTTCAAGTGCATACATGCATGGAGTACATTAAGTCAATGCCAATGGTGAACAAAGCTCAAAGCT  
T GTTTCGTT TGGTGCATACATGCATGGAGTACA TAGTCAATGCCAATG TCGAACAAGCTCAAAGCT  
TTTTCTTGTTCGTTCTGGTGCATACATGCATGGAGTACATTAAGTCAATGCCAATGGTGAACAAAGCTCAAAGCT  
\*3710 \*3720 \*3730 \*3740 \*3750 \*3760 \*3770 \*3780

\*4110 \*4120 \*4130 \*4140 \*4150 \*4160 \*4170 \*4180  
TGTACAAACTGGGTTA--TATGTTGAATGATATATACATATATAATATCTATATATATATATATATATACATATATAT

T CAAAC G T TA GT GGAA A ATACA A T T TC A T T C T T  
TCTCCAAAACACAGCTCTTAGTGGCGAA-----AGATACAGAG--TGTGTCGAG-TGT-----CGAGGTGCG  
\*3790 \*3800 \*3810 \*3820 \*3830 \*3840

\*4190 \*4200 \*4210 \*4220 \*4230 \*4240  
AGATCGGGCTTAAAGTACGCCCAATGCTTANGA-----AGAT-----GAAATTAAG-----GACACAATAAGTTTTAG  
AG TTAGATCGGCCAATG T AGA AGAT GAR TAAG G CAC A AA T AG  
AG-----TTAGTACGCCCAATGATAGAGATACTAGATACGAAACTGACACTGTACTGCACTGAAACTGAAG  
\*3850 \*3860 \*3870 \*3880 \*3890 \*3900 \*3910

\*4250 \*4260 \*4270 \*4280 \*4290 \*4300 \*4310  
CGATTTCAATGTT-----ACTCGTTTTGAAAGGGATTTGATTT-----CTGAAATGTTTTATGAAATTC  
C ATTT A T T T ACCTG TTIC A G TT TTT CT A T G TTTTATGAA TC  
CTATTTTACTATGTACTCCATAACTCGATTTCAATTATGTTATTTTTTAGCTTCGGGCTTATCGGCTTTATGAACTG  
\*3920 \*3930 \*3940 \*3950 \*3960 \*3970 \*3980 \*3990

\*4320 \*4330 \*4340 \*4350 \*4360 \*4370 \*4380  
TGTGTATTCGGTTTTCTTG--TTTCTCGTTTTAATCTAG--TTAGTTTAAATGCTACACAAAATAATCTCCAGATAC  
TGTTG ATTC T CTG T CT G TTA T T G TT TTTAATGCTACACAAAATAATCTCCAGATAC  
TGTTG-ATTCG--TACTTGTCTCGTGT--TTAGTTTCTGATTTAATTTAATGCTACACAAAATAATCTCCAGATAC  
\*4000 \*4010 \*4020 \*4030 \*4040 \*4050 \*4060 \*4070

\*4390 \*4400 \*4410 \*4420 \*4430 \*4440 \*4450 \*4460  
ATTAATATACTACTTAGAGAACATCAATTAACCTTAAATGTTCTTGGCAGTATTTTTTGCATATTTATATTTTCATAT  
ATTA ATACTACTTAGAGAACATCAATTAACCTT AATAGTCTTGGCAGTATTTTTTGCAT T AT TTTCAATAT  
ATTAC-ATACTACTTAGAGAACATCAATTAACCTTGTAGTGTCTTGGCAGTATTTTTTGCATATTTACTAT-TTTCAATAT  
\*4080 \*4090 \*4100 \*4110 \*4120 \*4130 \*4140 \*4150

\*4470 \*4480 \*4490 \*4500 \*4510 \*4520 \*4530 \*4540  
CGGTTTTGCTTTAAAATAATGCTCTTTCTTTCCCGC--CGTATACATATATTTTTCT----TGCTTAGCTTCA  
CGGTTT GCITTTAAAAT CTC T T TCCGC C T C T A T CT T CT T  
CGGTTT--GCTTTAAAATAATGCTCTCGTCTCGCTCGCTACTCGCTCTGTTAGGAGTCCCTAAGACTTTCCCGCCG  
\*4160 \*4170 \*4180 \*4190 \*4200 \*4210 \*4220 \*4230

\*4550 \*4560 \*4570 \*4580 \*4590 \*4600 \*4610  
AGCT-ATCC-----TTGATTTGATTAATGCTACATATTTGGCACAATAATAGCATTCTCTCTAGATAAATATACA  
CT TTCC TT GATTTGATTA STACGATA TTTGGCACAATAATAGCAT TTC C TA ATAAATATA  
TCCCTCTCAATGATTAGATTGGATTAACGTACGATA-TTTGGCACAATAATAGCATTCTCTCAATATAAATATACA  
\*4240 \*4250 \*4260 \*4270 \*4280 \*4290 \*4300

\*4620 \*4630 \*4640 \*4650 \*4660 \*4670 \*4680  
TATATA-----TATATATA-TGTATATATATATAGTGTATATTTATTTCAATTTAAAGTTAGGCATGTCTATGTC  
TATATA TA ATATA TGT T T T TATATA T T T TAT TT T T TAAAGTT GCA TC TGC  
TATATACTGTGATACATACATGCGT-TTTTGATATAAATCTTGGATTTTATTTCTTAAAGTTC--GCACCTGAGTGC  
\*4310 \*4320 \*4330 \*4340 \*4350 \*4360 \*4370 \*4380

\*4690 \*4700 \*4710 \*4720 \*4730 \*4740 \*4750 \*4760  
TGTATTTCAATAAATTTCTTTCATTCCCAACCCCTT-TTTCCACCGCACACCGGTGCATCATTTTTGAGTGTATG  
TGTATTT TATAATTTCTTTCAT TCCC CC CT T TCC CC C CCGG C CA GAG G G  
TGTATTTT-TATAATTTCTTCATATCCCGCCCGCTCATATCCCGCTCGT-----GAGGCGAGCG  
\*4390 \*4400 \*4410 \*4420 \*4430 \*4440 \*4450 \*4460

\*4770 \*4780 \*4790 \*4800 \*4810 \*4820 \*4830 \*4840  
T-CATTGGGATATACCTGAAGCCACCTGGCGGTGAGAGCGGCACCTTCCGCCCTTATTTTTTCTGCTTCTTATC  
CA T GGA C CC A C C G CGGT A G CC G C G C T TAT TTC GCT C T C  
ACCAGTGGAGCAGGCC--AGACTTTGGTGTGCTCATCGGGCCGAGAGCTCTTATTTGTCAGCTCCGCCAT--C  
\*4470 \*4480 \*4490 \*4500 \*4510 \*4520 \*4530

\*4850 \*4860 \*4870 \*4880 \*4890 \*4900 \*4910 \*4920  
GTTTGCAGTGCACAAATTTTGTAGTTTAAAGTTTATATCGCTTTTTCGTTGTGTT-TTTTGTTGTTTCAAGCAAAATG  
G ACATT A AA TTTGT TT AAGTTTAT TC CTTT CC G TG TTTGTTT TTTCAAG A G  
GACA--ACATT-AGAA--TTTGTATTAAGGTTATCTCTCTTTCCGGGCTTGTGTTTGTCTTCAAGCTACCCAG  
\*4540 \*4550 \*4560 \*4570 \*4580 \*4590 \*4600 \*4610

\*4930 \*4940 \*4950 \*4960 \*4970 \*4980 \*4990 \*5000  
CATTAATAATTAATTTAATAATTTTAAATAATAATCTACTACTAGTTAATAAAGTTTGAAGTGTATGTTGTTGAT  
CATTAATAATTAATTTTAAAT AT TATTAA ATA CTACTAC T A G T G GGTG GT TG G  
CATTAATAATTAATTTAATAATATAGATTAA--ATACTACTACAGTGAAGTGGTGTGGGGTGGAGTGGGGTG  
\*4620 \*4630 \*4640 \*4650 \*4660 \*4670 \*4680 \*4690

\*5010 \*5020 \*5030 \*5040 \*5050 \*5060 \*5070 \*5080  
ATCGGAGAGTGTATCAATTTGT--TTCCGATTTTTGATTTCCGATGCTTCAATATGGTCTGCTGTTGCTGCTAT--  
T GGTG GTG TA AAT GT T T GC T TG T G TGTGTTTC T G C TGC TG AT



-----  
TGCTTTTAGTCTGAACTTTGGTCAAATTCATAGAAAATCGATACTGATCTTGAACAGTATTTTCTGTTTTCTGTTTTCT  
\*6620 \*6630 \*6640 \*6650 \*6660 \*6670 \*6680 \*6690  
-----  
\*6360 \*6370 \*6380 \*6390 \*6400  
-----GCCAATTAATATATACTAATAATGTAATGTTAATGTTTAATGTTGG  
GCCAATTAAT G GA G T G G G  
AGTTGCCGAACAAGTTTTTCGATTATTTTGACGCCAATTAAT-----GCGA--GCTA-----GCCGA  
\*6700 \*6710 \*6720 \*6730 \*6740 \*6750  
-----  
\*6410 \*6420 \*6430 \*6440 \*6450 \*6460 \*6470 \*6480  
GTTTGGAAGAAATGTTTTATATACATACATATAGATAGTATTGTCAGTGTGATTGAAGCGGTTACTAGTGTTTACTCCTTAC  
G T GA T G T C TAC TAT AT G G CA CTTAC  
GTTTGACC--TCCGGCTCTGCTTACTTATTATTTAGG--GCCA-----CTTAC  
\*6760 \*6770 \*6780 \*6790  
-----  
\*6490 \*6500 \*6510 \*6520 \*6530 \*6540 \*6550 \*6560  
CTTTGTGACGACGACCACAACTAAATCTTTCAGTTTCGGTTGCTTTGGGGCTTTGTTAACTGTGCACTTTGGCTTTATCCG  
CT TGACCAGGACCACA C A TC TC T ACT C CT CG  
CT--TGACCAGGACCACAGCGGAGTCTGCTCC-----TCCACTCCTCCCTCG-----CG  
\*6800 \*6810 \*6820 \*6830 \*6840  
-----  
\*6570 \*6580 \*6590 \*6600 \*6610 \*6620 \*6630 \*6640  
AGGCATATGGGGTCCTCTTGGGGGCGGATTCGGAAGGGCGGTGACACAGCAGCAGATGCACTAGCAGCAACCGTAAATAACT  
G C TGGGTC TCT G A GG G GCCT CGT A ACT  
CGCC--TGGGTC--TCTCTGTTCTGTTAACTGGGGGCGGCT-----CGTGAAGACT  
\*6850 \*6860 \*6870 \*6880 \*6890  
-----  
\*6650 \*6660 \*6670 \*6680 \*6690 \*6700 \*6710 \*6720  
GCCGCACTGCTGTCAATGAACAATGATTTCTGCGTTTAAAGTCACTTGCCTCGCGGATTTTGTATCCGAATATATG  
G C CG CTGCTGTCAATGA AT ATT CTGCG AA TCA T G CTC C TCG TATA G  
GGCTCGGCTGCTGTCAATGAGTATAATGCTCCG--AATTCAGTGACTC--CTC-----TCCGGCTATA--G  
\*6900 \*6910 \*6920 \*6930 \*6940 \*6950  
-----  
\*6730 \*6740 \*6750 \*6760 \*6770 \*6780 \*6790 \*6800  
ATTTTAATTCGTTTCCAAATTCGATTTCCAATCCCGATTCGATCCCGGCTATATCTGAATCCA----GCCAAGAATA  
A TC TCTGATCCC GATTC GATCCCCGGTATATC GA TTCCA GCCAAGAA  
AA-----TCTGGTCTGATCCC--GATTCGATCCCGGCTATATCAGATTTCCAGGCTGCCAAGAA--  
\*6960 \*6970 \*6980 \*6990 \*7000 \*7010  
-----  
\*6810 \*6820 \*6830 \*6840 \*6850 \*6860 \*6870 \*6880  
ACTGCAAGTGGAAAACAAAGGGCGAAATTAATAATGCAATGTGTTTGTGTTTGTGTTTGTGTTTATATCTGTATGCAAAA  
ACTGCAAGTGG AAACAAAGGGCGAA TTA TAATGCAATG G A TCTGTTATGCAAAA  
ACTGCAAGTGG-AAACAAAGGGCGAA-TTATAATGCAATGG-----AGTCTGTATGCAAAA  
\*7020 \*7030 \*7040 \*7050 \*7060 \*7070  
-----  
\*6890 \*6900 \*6910 \*6920 \*6930 \*6940 \*6950 \*6960  
AAGCTGAATTCGACCAAGAAAACGAGAGCAGAGCAGAGCAGGCGACGAAGAGCAGAGAAAACAACAAACAGAACACA  
GAATTCGAGCCAAAGAAA CAG GC GC G CG AGAG  
CGAGGAATTCGACCAAGAAAACAGTGCC--GCT-----GGGGCGAGAG-----  
\*7080 \*7090 \*7100 \*7110  
-----  
\*6970 \*6980 \*6990 \*7000 \*7010 \*7020 \*7030 \*7040  
ACAAAGTAAAGAGATGGGCCATAAATATAGGCTATATGGCTTTGGCTATGGCTAGCAGATATGGCAGGGGCTTTCCATT  
G GT G G G GG A AA GCT AGATATGGC GGC TTCCATT  
---GGTG--GGTGGGGTGGAAAA--GCT-----AGATATGGCC--GGGCAATTCATT  
\*7120 \*7130 \*7140 \*7150 \*7160  
-----  
\*7050 \*7060 \*7070 \*7080 \*7090 \*7100 \*7110  
ATTGATTTCCATTTGCAATCTCTTGGCTCCGGCCGCTGTAATTCAGTGGCAACC--CACACACACA  
ATTGATTTCCATTTGCAATCT TC G CG TGGTAAATTCAGT GGCAACC CACACA ACA  
ATTGATTTCCATTTGCAATCTT-----TCTGCGTGGTAAATCCAGTGGCAACCAGCACAGACA  
\*7170 \*7180 \*7190 \*7200 \*7210 \*7220  
-----

5n)

CG31909:melanogaster(above), yakuba (below)  
Martinez/Needleman-Wunsch DNA Alignment  
Minimum Match: 9; Gap Penalty: 1.10; Gap Length Penalty: 0.33  
-----  
\*110 \*120 \*130 \*140 \*150 \*160 \*170 \*180  
GTCCATCATCTCGAGGAGACAGCTTCGATGCCGACCTGAAAAGAAAGTTTAATTAACACAGGATTCCTATAAAATATCT  
GTCCATCATCTCGAGGAGACAGCTTCGATGCCGACCTG AA GAAAGTT A TT AG TA CTATAAAATATCT  
GTCCATCATCTCGAGGAGACAGCTTCGATGCCGACCTGCAAGGAAAGTTAAGT-----AGTTA--CTATAAAATATCT  
\*1110 \*1120 \*1130 \*1140 \*1150 \*1160 \*1170 \*1180  
-----  
\*990 \*1000 \*1100 \*1120 \*1130 \*1140 \*1150  
CCTTCTGCT--CCTAAAATATATCT---CCTTACTCTGAGTCAATGTCCGAAATATCTCGCGACCTCGTCAACATCA  
CCTTCT CTT A TTA T C TACTCTGAGTCAATGTCCG A TACTCCGTCACCTCGTC CCACTC  
CCTTCTTAACTCTTCTTAAAGTAGACAATCTCTGAGTCAATGTCTAGTATCTCGCGACCTCGTCCCATCTCCG  
\*1810 \*1900 \*2000 \*2100 \*2200 \*2300 \*2400 \*2500  
-----  
\*1160 \*1170 \*1180 \*1190 \*1200 \*1210 \*1220 \*1230  
CCGCGCAAGTCAGGAAGCTGCGTGTACACCGCTTGCCTGCTTCAGATTGTCATTGACAGCCGCCCACTGGAAGTCTCTG  
CGCGCAAGTCAGGAAGCTGCGTGTACACCGCTTGCCTGCTTCAGATTGTCATTGACAGCCGCCCACTGGAAGTCTCTG  
CGCGCAAGTCAGGAAGCTGCGTGTACACCGCTTGCCTGCTTCAGATTGTCATTGACAGCCGCCCACTGGAAGTCTCTG  
\*2600 \*2700 \*2800 \*2900 \*3000 \*3100 \*3200 \*3300  
-----  
\*1240 \*1250 \*1260 \*1270 \*1280 \*1290 \*1300 \*1310  
CGCTCCCTGTTTGTGCTTTTTTGGCCCGCAGCTGCACCTTGGTCATAGCTCCCTCGCCACAGGCCCCTGGTATCGATGGGG  
CGCTCCCTGTTTGTGCT TT GG CGCAGCTGCACCTTGGTCACT CG CCTCGCCACAGGCCCCTGGTATCGATGGGG  
CGCTCCCTGTTTGTGCTTTTGGTCCGCACTGCACCTTGGTCACTCGCCCTCGCCACAGGCCCCTGGTATCGATGGGG  
\*1340 \*1350 \*1360 \*1370 \*1380 \*1390 \*1400 \*1410  
-----  
\*1320 \*1330 \*1340 \*1350 \*1360 \*1370 \*1380 \*1390  
TCATGGGGCCGCTGTGAGCGCGTGGACGAAGCACTGCTCCTTTGAGAGCTTCTGAAGATGTTCCCGCTTTCCGGCGGCTC  
TCATGGGG GC GTGGCCCGTGGAGCAAGGC GTCTCCTTGAAGATGTTCCCGCTTTCCGGCGGCTC  
TCATGGGGCCGCTGTGAGCGCGTGGACGAAGCCCTCTCCTTTGAGAGCTTCTGAAGATGTTCCCGCTTTCCGGCGGCTC  
\*1420 \*1430 \*1440 \*1450 \*1460 \*1470 \*1480 \*1490  
-----  
\*1400 \*1410 \*1420 \*1430 \*1440 \*1450 \*1460 \*1470  
TCGATCGACGAGTTCAGCGGCTGTAGCGGAACTGTTCTTCGCAATGGTGTGGCCAGAGCCGGGCTCGTAAAGGT  
TCGATCGACGAGTTCAGCGGCTGTAGCGGAACTG TCTTCGCAATGGTGTGGCCAG CGCGCGGCTCGTAAAGGT  
TCGATCGACGAGTTCAGCGGCTGTAGCGGAACTGCTTCGCAATGGTGTGGCCAGAGCCGGGCTCGTAAAGGT  
\*1500 \*1510 \*1520 \*1530 \*1540 \*1550 \*1560 \*1570  
-----  
\*1480 \*1490 \*1500 \*1510 \*1520 \*1530 \*1540 \*1550  
TCCCGCAATCCCGTCTCCTTGGCACTGGTGGTTCGACCGCGTGGCAGGCAATCTGCAAGGCTCCACCACT  
TCCCGCA TCCCGTCTTTCG CACTGGTGTCTG CGCGCGTGGC GGCATGATCTGCAAGGCTCCAC ACTT  
TCCCGCACTCCCGTCTCCTTGGCGCACTGGTGGTTCGTCGCGCGTGGCAGGCAATCTGCAAGGCTCCACCACT  
\*1580 \*1590 \*1600 \*1610 \*1620 \*1630 \*1640 \*1650  
-----  
\*1560 \*1570 \*1580 \*1590 \*1600 \*1610 \*1620 \*1630  
GGCCCTCGGAAGTGAACACCGCCATCACCGTGTGCTCCGAAATGAAGTGTTCGCTGAGACATAAAGTATTCGAAATTT  
GGCCCTCGGAAGTGAACACCGCCATCACCGTGTGCTCCGAAAT GAAGTGTTCGCT AG CAT AAGTATTCGAAAT  
GGCCCTCGGAAGTGAACACCGCCATCACCGTGTGCTCCGAAATAAGTGTTCGCTGAGACATCAAGTATTCGAAATA  
\*1660 \*1670 \*1680 \*1690 \*1700 \*1710 \*1720 \*1730  
-----  
\*1640 \*1650 \*1660 \*1670 \*1680 \*1690 \*1700 \*1710  
TTCATAGAAAAGTAAAGTATCTTAAAAGTCTTTTGTAGAGCTATACCACAAATAAATACGTTTTTATTATATAAAA  
TTCATAGAAA G  
TTCATAGAAAAGC  
\*1740  
-----  
\*1720 \*1730 \*1740 \*1750 \*1760 \*1770 \*1780 \*1790  
AGAGAGAATCTATAGTCCGAACTCCCGACTATTAGAAAGCCCTTACTCAGTGTGGGAACGGAAATCTTTCTAATC  
-----  
\*1800 \*1810 \*1820 \*1830 \*1840 \*1850 \*1860 \*1870  
TAGTAGTCACCTTTTACTCTACAGTAAGGGAAAATTCGAACGGAGGAGGAGTGTGAAGTGTCAAGTCCAAATAGAC  
-----



50)

CG31909:melanogaster(above), erecta (below)  
Martinez/Needleman-Wunsch DNA Alignment  
Minimum Match: 9; Gap Penalty: 1.10; Gap Length Penalty: 0.33

```

      110   120   130   140   150   160   170   180
GTCCATCATCTCGGAGGACAGCTTCGATGCCGACCTGAAAAGAAATTTAATTAGCACAGGTATCTTATAAAATATCT
GTCCATCATCTCGGAGGACAGCTTCGATGCCGACCTGAAAAGAAATTTAATTAGCACAGGTATCTTATAAAATATCT
GTCCATCATCTCGGAGGACAGCTTCGATGCCGACCTGAAAAGAAATTTAATTAGCACAGGTATCTTATAAAATATCT
      90    100    110    120    130    140    150    160
CCTTCTGCTCCTTAAAATATATCTTCTTACCTCTGAGTCATGTCGCAATATCTCGTGACCTCGTCACCATACCACCCG
CCTTCT C CT   A T C TTACCTC GAGTCATGTCGCAATATCTCGTGACCTCGTC CC TC CC CCGC
CCTTCTACATCTCCTCCCACTTAGC--TTACCTCCGAGTCATGTCGCAATATCTCGTGACCTCGTCCCGCTCCGCGCC
      90    980    990    1000    1100    1200    1300    1400
GCAAGTCCAGGAAGCTGCGTGTACACCGCTTGCCTGCTTCAGATTGTCATTCGACGCCGCCACTGGAAGTCTCTGGCC
GCA GTCACGAAAGCTGCG GTCACACCGCTTGCCTCTTCAGATTGTC GTCACGCCGCCACTGGAAGTCTCTGGCC
GCAGGTCACGAAAGCTGCGGCTACCCGCTTGCCTGCTTCAGATTGTC GTCACGCCGCCACTGGAAGTCTCTGGCC
      150    160    170    180    190    200    210    220
TCCTGTGTGGCTTTTTGGCCGCGAGCTGCACCTTGGTCATACGTCCTCGGCACAGGCCCTGGCTATGAGTGGTTCAT
TCCTGTGTGGCT TT GGCCGCGAGCTGCACCTTGGTCAT CG CCCTGGCACAGGCCCTGGCTATGAGTGGTTCAT
TCCTGTGTGGCTTCTTGGCCGCGAGCTGCACCTTGGTCATCGGCCCTCGGCACAGGCCCTGGCTATGAGTGGTTCAT
      230    240    250    260    270    280    290    300
GGCGCCGCGTGTAGCGCGTGGACGAAGCAGCTTCTCTGTAGAGCTTCTTGAAGATGTTCCGCTTCCGCGCGTCTCGA
GGCGCCGCG GTGAGCGCGTGGACGAAGC GTCCTCTGTAGAGCTTCTTGAAGATGTTCCGCTTCCGCGCGTCTCGA
GGCGCCGCGCGTGTAGCGCGTGGACGAAGCAGCTTCTCTGTAGAGCTTCTTGAAGATGTTCCGCTTCCGCGCGTCTCGA
      310    320    330    340    350    360    370    380
TCGACAGTTCACAGCGTCTGTAGCGGAACTGTCTCTCGCAGTGGTGGCCAGACGGCGGCCCTCGCTAAGGTTCCCT
TCGACAGTTCACAGCGTCTGTAGCGGAACTGTCTCTCGCAGTGG TGGTGGCCAG CGGCGGC TCCT AG GTTCCT
TCGACAGTTCACAGCGTCTGTAGCGGAACTGTCTCTCGCAGTGGTGGCCAGGCGCGGCTCTGTAGGTTCCCT
      390    400    410    420    430    440    450    460
GGCAATCCCGTCTCTTCGCGACACTGGTGGTTCGACGCGCGTGGCAGGCATGTATCTGCAGGTTCCACCACTTGGCC
GGCA TCCCGTCTCTTCG CACTGGTGGTTCG CGCCGCGTGG GGCATGTATCTGCAGGTTCCACCACTTGGCC
GGCAGTCCCGTCTCTTCGCGCACTGGTGGTTCGTGCGCGCTGGCCGCATGTATCTGCAGGTTCCACCACTTGGCC
      470    480    490    500    510    520    530    540
CTGCGAAGTGAACACCGCACTACCCTGTGCTCCGAAATGAAGTTCCTGGCAGACATAAAGTATTGGAATTTTTCA
CTGCGA GTAACACCGCACTAC GTGTGCTCCGAAATGAAGT TCGCTGG AGACATA AGT TTG CA A TTC
CTGCGAGTGAACACCGCACTACTGTGTGCTCCGAAATGAAGTTCCTGGCAGACATAGAGTTTTGCGAAGGATTC-
      550    560    570    580    590    600    610    620
TAGAAGAAAGTAAAGGATTTCTTAAAGTCCCTTTTTAGAGCTATACCACAAATAAATACGTTTTTATATAAAAGAAAG
-----
      730   740   750   760   770   780   790   800
AGAATTCATAGTCGAACTCCCGACTATTAGAAAGCCCTTACTCAGCTAGTGGGAACGCAAAATCTTCTTAATCTAGT
-----
      810   820   830   840   850   860   870   880
ATGCACTTTTACTCTACGACTAAGGAAATTTTCGACGGAGGACGATGTTGTTAACTGTCAAGTCAATAGACCCCTA
AT   TA GG AAAAT   CA TT TGTT T T TC T AG C CTA
AT-----TATGAAAATA-----CAATTTGTTTT--TCTGCTTC--TGG--CTA
      960    970    980    990
```

```

      1890   1900   1910   1920   1930   1940   1950   1960
CAGTCAGAAAACCTTATATAGTCGCGGTGAGTGAGGTGAGTGAGAAAAGTGGGTTTCGATCTTAACATAAAAAAATATTTTTC
CA T      TTA      AA GT GG T      AAT TTT C
CACT-----TTA-----AATGTTGGCT-----AATTTTGGC
      9700      9710      9720

      1970   1980   1990   1000   1010   1020   1030   1040
TGATTTTAAACAAATAGATTTCTTGGTACGTATGAACACAGAATGAACGACCATTTGTTATATCTAAGCTCATATAATT
TG TTA C AT A TCT
TGA--TTAGGCCCATCTAATCTC-----
      9730   9740

      1050   1060   1070   1080   1090   1100   1110   1120
GCCAGACACAAGGTGCTGTCCACCATCACCACAAAAAATGGAACCTCGTTTTCCAATACTAACAATCGGAACCTTC
-----

      1130   1140   1150   1160   1170   1180   1190   1200
AAGAACCACTACGAGTAGAGAGGCTCTGCAAGATAAATATTTAAAGAAATTTCTTCAATGGCGGATGAGCTAAATCAC
-----

      1210   1220   1230   1240   1250   1260   1270   1280
TTAATGTAGGCACTACTCCGACCATATGAGACTTATGAATATTTGGACACTGTCTGACACTGAAAGCGGCTGTTCTCT
-----

      1290   1300   1310   1320   1330   1340   1350   1360
CGAAGAAGAGAAAAGTTAACTAACTTTTCTATAAATTGAAGGCGGATCTACAGAAATATATAGAGAAATCGTAGAGA
-----

      1370   1380   1390   1400   1410   1420   1430   1440
ACCCAAAATATTTAAACGAAATCAGGATTCAACTATTTAAGGACAAATATAGATTACTGGATGAAGTAGACGCTTTT
-----

      1450   1460   1470   1480   1490   1500   1510   1520
GAAGGTTCGATGAATGCTTTGACGGACAGGTGGGATTTGAAAAATGTAAAAAATTCGGGTGTACTTTATTTTTTAT
-----

      1530   1540   1550   1560   1570   1580   1590   1600
GTTTAAAAAATAAATAAAGAAACAGGTAACCGGTTATTTCTTTACTCTACAGTATACAGGTATATTTGGATTCCGATTTT
-----

      1610   1620   1630   1640   1650   1660   1670
TATTAAGCGCACCTATCTTGGCTTGGAGA-----TGATTTTACACAGATTTTCAGCGCCGAGTGGCCACTCT
GCTTCGAGA TGA TTTTACACA A TTC GCGCCCA GGCACACT
-----GCTTCGAGAACTCTACATGAGTTTACACA--AATCTCGCCCAAGCCCACT
      9750   9760   9770   9780   9790   9800

      1680   1690   1700   1710   1720
AGCAGAACTTGATGAAGCTTTGTGTGGAGC--AATCGGTAAAAATACCGTTTCAAAAGAAATTTAAATTTTGTGGCCCT
AGC GA CT G TGAAGC GT CGAG AATCGGTAAAAATACCGTTTCA GAGAATT AAA TTG GCGCC
ACGGGATCTCGGTGGAAGC----GTCCGAGTTAATCGGTAAAAATACCGTTTCAACCGGAAATTCAAACCTTGGCCGCC
      9810   9820   9830   9840   9850   9860   9870

      1750   1760   1770   1780   1790   1800
ACTT---AGTTAAACAATA---TGCATTGACACTTAATAAATAATAATAAATAAAT---AAATTTAAATTT---
CTT A TAAA A A TGT T T AAC C AAT A TT A T AT TT A T TT
TCTTTACATTTAAATTTAGAACAGTGTCTGTAACCTCGGAATGCCGATTTGAAATTTTCAATGTTGGACTCTCGAATTTCT
      9880   9890   9900   9910   9920   9930   9940   9950
```



AAATAGACCCACAGTCAGAAAACCTTATATAGTCGGTGAGTGAAGTGAGAAAGTGAAGTTCGATCTTAAACATAAA  
TAAA  
-----TAAA

¶950 ¶960 ¶970  
AAATATT-----TTTCTGATTTAAAC-----AAAATA-----A  
AAATAT TTTCTGATTT AA AA ATA  
AAATATATATAGAAAATGGATAATATGTTTTAATTTATGATTTCTGATTTCCAAATTTGAAGATAGAAAAGCTTGA  
¶9610 ¶9620 ¶9630 ¶9640 ¶9650 ¶9660 ¶9670 ¶9680

¶980 ¶990 ¶1000 ¶1010 ¶1020 ¶1030  
GATTC-----TGGTACGTATG-----AACACAGAATGAA-CTGACCAT-----TGTATAT--CTAAGCTCAT  
GATTC T GT TATG A C GAAT AA CTGAC AT T TT TAT C AA C T  
GATTCATTAATAGTTTTTATGTTTTTTTATCTACGAATAAATCTGACAATTTGAAAATATTTTATGGCGAAAACCTT  
¶9690 ¶9700 ¶9710 ¶9720 ¶9730 ¶9740 ¶9750 ¶9760

¶1040 ¶1050 ¶1060 ¶1070 ¶1080 ¶1090 ¶1100  
-ATAATTGCC-AGACAACAAGT-----GCTGTACCATCACCAACAAA-AAAAATGAACCCCTGTTTCCA-----AT  
A AA TG A ACA AA G G T T AC A CA A AAA AA AA ACCCT T CA AT  
CAGAAATGAGAAAACATAAAAGCCCATAGTTTTTACAACCAATGATAAACAACAACACCCCTGATAGCAACCTTTAT  
¶9770 ¶9780 ¶9790 ¶9800 ¶9810 ¶9820 ¶9830 ¶9840

¶1110 ¶1120 ¶1130 ¶1140 ¶1150 ¶1160  
ACTAACAAATCGGAATTCAGAACCACTACGA--GTAGAGAGACTCTGCAAGAT--AAATATT-----  
A TA AT G AAC CA A C A TA A GTA CCT CAA T AA T T  
ATTACTTTATTCCACACCATATCAGAAATCAGAGTATGCTTTCTTATCAATTTCCAACCTGTGTGGCTTCGAGGAA  
¶9850 ¶9860 ¶9870 ¶9880 ¶9890 ¶9900 ¶9910 ¶9920

¶1170 ¶1180 ¶1190 ¶1200 ¶1210 ¶1220 ¶1230  
-----AAAAAATTTCTTCAATGGCCGATGAGCTAAATCACTTAATGATGGCACTACCCAGCATAATGAGACTTA  
AAAAAATTT CCA  
TCAGAAAAGAATTT-----CCA-----  
¶9930 ¶9940

¶1240 ¶1250 ¶1260 ¶1270 ¶1280 ¶1290 ¶1300 ¶1310  
TGAATTTGGCACTGTGACACTGAAAGCGGTCTTCTCGAAGAAGAGAAAAGTTAACTAACTTTTTCTATAAAT  
-----

¶1320 ¶1330 ¶1340 ¶1350 ¶1360 ¶1370 ¶1380 ¶1390  
TGAAGGCGATCTACAGAAATATATAGAGAAATCGTAGAGAACCCAAAATATTTAAACGAAATCAGGATTCACAACTT  
-----

¶1400 ¶1410 ¶1420 ¶1430 ¶1440 ¶1450 ¶1460 ¶1470  
ATAAGGCAATATAGATTTACTGGATGAAGTAGACCTTTGAAGGTTGATGAATGCTTTGACGGACAGTGGGAT  
-----

¶1480 ¶1490 ¶1500 ¶1510 ¶1520 ¶1530 ¶1540 ¶1550  
TGTAAAATGTAAAAAATTCGGGTGTACTTTATTTTTATGGTTAAAAAATAAATAAGAAACAGGTACCCGTTATTC  
-----

¶1560 ¶1570 ¶1580 ¶1590 ¶1600 ¶1610 ¶1620 ¶1630  
TTTACTCTACAAGTATAACAGGTATATGGATTTCGATTTCTATTAAGCGACACCTATCTTTGGCTGACAGATGATT  
-----

¶1640 ¶1650 ¶1660 ¶1670 ¶1680 ¶1690 ¶1700 ¶1710  
TTACACAGATTTACGCCCACTGCGCCATCTAGCAACCTGTATGAAGCTTTGTGTGGCAACATCGTAAAAATACC  
-----

¶1720 ¶1730 ¶1740 ¶1750 ¶1760 ¶1770 ¶1780 ¶1790

GTTTCAAAGAGAATTTAAATTTTGTGGCGCTACTTTAGTTAAACCAATATGTCAATTTGAACACTTAAATAATTAATTAATA  
-----

¶1800 ¶1810 ¶1820 ¶1830 ¶1840 ¶1850 ¶1860 ¶1870  
TAATAATTAATTAATTTAAATTTAAATTTAATTTAATTTAGCACACCCCAACCTTAGAGATGCAACATCGAAATTTCTGAACTAC  
-----

¶1880 ¶1890 ¶1900 ¶1910 ¶1920 ¶1930 ¶1940 ¶1950  
AAAGTTTTTACTGCTAATAATAAACCGGCACATGAGAACTTTTATTGATTTATCAAAAGTTACAACACACATGCTAGT  
-----

¶1960 ¶1970 ¶1980 ¶1990 ¶2000 ¶2010 ¶2020 ¶2030  
ATGGCCTTCTCTTATCAGTTTTCTAGAAAATAGCAGAAGGAATTCCTTGAATTTGGTTTTCT--CCATGCCATATCTGTTTT  
TGAATTTGGTT C C ATG TA GTT C  
-----TGAATTTGGTTCCCTCTATGCTTAAAGTTAC  
¶950 ¶960 ¶970

¶2040 ¶2050 ¶2060 ¶2070 ¶2080 ¶2090 ¶2100  
CAGTTATTTCGAAG--CTTATTGTGAGAAATGCAAGTATCTTTGAATTTATCAAAAAGGAAAGCCGCGC-----  
CAGTATT ARG CTT TGC G C ATT T AA AACCCCGC  
CAGTTATTGAAGCTTT-----TGCC-GCCCC-----ATTTGGTAAG-----AACGCCGCGCGCCGACGATG  
¶980 ¶990 ¶1000 ¶1010 ¶1020 ¶1030

¶2110 ¶2120 ¶2130 ¶2140 ¶2150 ¶2160  
CTG-----CACCTACCCGCTTCTGGCCAGCGTC-----GGTTATCATTTTGGGACCCACCTCCGCGCGGGGACT  
CTG CACT A CC TTCTG CCAGC TC GGTATCATTTTGGGACCCACT CC C  
CTGCAGAGTTCACCTCAGCCATTTCTGCTCCAGCTTGGTGGGTTATCATTTTGGGACCCACTCTCCCTCT-----  
¶1040 ¶1050 ¶1060 ¶1070 ¶1080 ¶1090 ¶1100 ¶1110

¶2170 ¶2180 ¶2190 ¶2200 ¶2210 ¶2220 ¶2230 ¶2240  
GTTGAGATGCTGATTTGCAGGAAATCTTAAATTTCTATAAACTTAAGTGCATGTAATTTGGCGTATGATTAACGAG  
AGTATCTGATTTGCAGGAAATCTTAAATTTCTATAAAA TTAAGTGCATGTAATTTGGCGTATGATTAACGAG  
-----AGTATCTGATTTGCAGGAAATCTTAAATTTCTATAAAATTTAAGTGCATGTAATTTGGCGTATGATTAACGAG  
¶1120 ¶1130 ¶1140 ¶1150 ¶1160 ¶1170 ¶1180

¶2250 ¶2260 ¶2270 ¶2280 ¶2290 ¶2300  
CTCAGCATATC--TGCGGCTATCGGGCTATCT-----GGCTATCCGACTATTTCCGCTCCCGCT  
CTCAGCAAT T G TATC GGC AACT G CTATC GATATTTCCGCTCCGT T  
CTCAGCATATATATGTATATCTGGCCATCTGAATCTGAATCTGAATCCCGCACTATCTGACTATTTCCGCTCCCGTTT  
¶1190 ¶1200 ¶1210 ¶1220 ¶1230 ¶1240 ¶1250 ¶1260

¶2310 ¶2320 ¶2330 ¶2340 ¶2350 ¶2360  
GGCCCTCGAGGACCGATTTCCCCACATTT-----CCCTTTT-----TTTCTCGATTCATTTGC  
CGC TCGAGCA GATTTT CC CATT C CC TC TTCTCCG TTAT TGC  
TCGCTTCGAGCAAGATTTTT--CTCATTTAAAAATTTTTTTTAAATGGCGGCCCTCTAAAATTTCTCCGGTTCTACTCG  
¶1270 ¶1280 ¶1290 ¶1300 ¶1310 ¶1320 ¶1330 ¶1340

¶2370 ¶2380 ¶2390 ¶2400  
CC-----CAACAGAC-----CCCCCCCATAATTTGATCAAACTTCGCGCACT-----CA  
CA A C CCCC CC AAT ATC AACTTTGCCACT CA  
TTTTCTGCTTTTAAATCAGAATTCATGAATTTCTGGTTTTCCCTCCGAAATCTATCTCAACTTCGCGCACTGAGCAACA  
¶1350 ¶1360 ¶1370 ¶1380 ¶1390 ¶1400 ¶1410 ¶1420

¶2410 ¶2420 ¶2430 ¶2440  
AAGTCTGTGATAATATTC--ATTGAGATTTGTCT-----TCA-----  
AAGTCTGT ATAAATTC ATG GATTTGTCT TCA  
AAGTCTGTATAAATTTCCATTCG--GATTTGTCTAGATTTGCTCCCGAAAGATCGGCATCGCTAGCTAGCTGCCA  
¶1430 ¶1440 ¶1450 ¶1460 ¶1470 ¶1480 ¶1490 ¶1500

¶2450 ¶2460 ¶2470 ¶2480 ¶2490  
-----TTTTCG-----TTT-----CTCATTTTTATGGAAATTAATTTGCCACATTTTC  
C T CCG T TG CTC CTTTTATG GAAATTAATTTGCCAATTTTC  
AGGTGCTGTCCCGCTGCTGTGCCGCTGCTGGAGCTGCTCTGCTTTTTTATGTGAATTAATTTGCCAATTTTC  
¶1510 ¶1520 ¶1530 ¶1540 ¶1550 ¶1560 ¶1570 ¶1580

¶2500 ¶2510 ¶2520 ¶2530  
GCAATTAATTAATTAATTTGAATTTTGAATTTTCAAGTAGTT



GCAATTAATTAATTAATTGAATGTTTGAAATGTTTACAAGT GTT  
GCAATTAATTAATTAATTGAATGTTTGAAATGTTTACAAGTTGTT
