# Supplementary material
Source: PubMed Central journal article supplement (PMC1502557)
Supplement: pnas_0509809103_2.pdf [file pnas_0509809103_2.pdf]

6a)

CG32582 focal and paralogous regions  
Martinez/Needleman-Wunsch DNA Alignment

Minimum Match: 9; Gap Penalty: 1.10; Gap Length Penalty: 0.33

D. mel region including coding sequence (above, X:15668213-15672184)

D. mel region including noncoding sequence (below, X:15778012-15782410)

v10 v20 v30 v40 v50 v60 v70 v80  
-----TTGATTTGATTGTTGGTTCGAGGATTTATT-GTTGTTAAATTCGCTTCGAGTTT--AGTCGGTTTCTGGTTTAAAGATTCGGTTTCC  
TT T A T G GAG A TT G AATTG CGAG T A T GG CTGG AA AT G  
ACTAGTTAACCTAAAATGGACGGAGTAAAAGTTAGCAACAATAAAG-CCAGATGGAATGGGAATCGG---AAAATGGGAA---

v90 v100 v110 v120 v130  
ATTGGAACGTTTGTAGTCGACGAAGACAAAAGATTTTGGAAAAACA-----TGTAG--TTAT-----GG  
A TGGAA T A AAA AAA GA T TGGAAAACA TGTA TTAT G  
AATGAAAATGGAAAATGGGAAAATGGAATGAAATGGAAAACAACCTTAAACAGCAACAATAATGTGTTATCTATGTGTGAGTGTG  
^520 ^530 ^540 ^550 ^560 ^570 ^580 ^590 ^600

v140 v150 v160 v170 v180 v190 v200 v210  
ACAGCACTG--ATGCGG---CAAGAATGAGGAAAAATCA--AATTGTGGG---CGTTATTT-TATTGTGATAG-AAAGTGACAGCGT  
A A A T AT C CA AT A AA AAT A AA TG G G C ATTT TATT T AT G A A TGA A CGT  
AAATAAATAGCCATCTTTTATTCATAGATTAATAACAATTTAATGAGTGCATCCCAATTTATATCATAATCGTATAATGATA-CGT  
^610 ^620 ^630 ^640 ^650 ^660 ^670 ^680 ^690

v220 v230  
CACCGGATGA-----AAAAATGAAAG-----AT  
GATGA AAAAAATGAAAG AT  
ATATATGATGAGAGACAACAAAACCGAAAAATGAAAGCAAAAGCTTAACAAAACAAAACCGAAAACAACAGCAACCGCATTAACGAAAT  
^700 ^710 ^720 ^730 ^740 ^750 ^760 ^770 ^780

v240 v250 v260 v270  
AAA-----GGCCTATATGTA-----TGTACAT-----ATGG-ATGTAACGGCCCT  
AAA GG ATAT TA T T CAT ATGG ATG AA G C  
AAATAATTA AAAATGGGAAATTTTACATATTTTTTGGCATACCTCGGACCAACAAATGGAATGCCAAATGTTGAGATAGAAAATCTTTTC  
^790 ^800 ^810 ^820 ^830 ^840 ^850 ^860 ^870

v280 v290 v300 v310 v320 v330 v340 v350  
-----TAAAAATAAACACCGAGTCTCTTATTGTATCCCCAATCGCTTTTGTGCAAGAAAATATATAGACGAAATTTATTCCTACGAT  
TAAAAATAAAA T CAA A AA A A A AAA A  
AAAAAAAATAAAAATA-----TACAAAACAAAACAAAACAAAACAAAAC-----  
^880 ^890 ^900 ^910

v360 v370 v380 v390 v400 v410 v420 v430 v440  
TAATCCTTTGATCGGATTTTATTTCGTTTTCTGCGTTTTTTCGCACTTCCCGTTACGACGGGAAAATACAGCACTTTATTTTATTGG  
CA T CCGT A AC G AAA  
-----CAATGACCGTAA--ACAGAAAA-----  
^920 ^930

v450 v460 v470 v480 v490 v500 v510 v520 v530  
AGGTGAGCGAGGAGAGAGAGAGAGAGTGAAGCGAATCAAGAGAGAGAAATTTGAAAAGAAAAGAGCGACATTTATCATCAAAAATCGCT  
C A AA AGA AAT AAAA AAA AG CA A TA  
-----CCACAAAAGAAATAAATAACAAAACCAAAAAGCAAAAATAA-----  
^940 ^950 ^960 ^970 ^980

v540 v550 v560 v570 v580 v590 v600 v610 v620  
GCTCACACAGAAAAGTAGCAGCATGTGAGTTCGCTTTGAACAATAGTCACTGACTAATACATGTACAGCAATTTTGTCTTGTGTTT  
-----AAATTT  
AAAT T  
TTCCAGCTTTTAAACATCCATTTGCTTTCATTAGGGTGACCAAGGGCTTCTCTATGCTGAGTTTAAAAATTTTTCGACCAATGATTC  
^1530 ^1540 ^1550 ^1560 ^1570 ^1580 ^1590 ^1600 ^1610

v630 v640 v650 v660 v670 v680 v690 v700 v710  
CCCTCCCCCTGRTGTCATGAAAATCGAAAATCGCATTTAAAATATCACTGTTTTGCGCCTGATAACAATGGGCAATGCCATGAAAATGG  
-----  
-----  
-----

v720 v730 v740 v750 v760 v770 v780 v790 v800

ACGAAAATTCGGTGTATATACATCAAATAGTGTAGCGGTAATTCCEAATTCACACGACACAGCAGCACTCGCGCACACACATCCAGAT

v810 v820 v830 v840 v850 v860 v870 v880 v890  
GAGCGCCACACTTCGAGTGCAGCAATATGCCACATAAACCAAGACATAATTTAGATAAACCGTAAATTAATTCGATGCTTTTTCATCAAAA  
-----  
-----AAA

v900 v910 v920 v930 v940 v950 v960 v970 v980  
TAAACAAAATTTGTA--TGTATATATTCGATTTGCAAGGAAACACACACAGCACTT-TAGCA--CTTTACATTTTTTCCCAATGATCG  
TAAACA AA G A TGTA ATAT A TT A A A A A T T TA A CTTT C T A A T G  
TAAACACAAAACGAGCTGTAATAATGAAAATTAATTTATGCTAGTAGTAATATATACGATCCTTTGCTGGAGGTTGAGAGAACTTG

v990 v1000 v1010 v1020 v1030 v1040 v1050 v1060 v1070  
AA-AGATATTTGGAGCCCG-TATGCTTACTGCAATTTAACAAAAATGTACGCTAAGTACTAT-CATACTCGAAATATCACGCTGGTGT  
AA A T TGG C G TA CG G AA AA A AA TGT C CT G C C CT AAA AA C C C T TG  
AACATTTTCGATGCTCAGCGGACGGCAGGAAA--AATACAATTTGCACTGGCGCCAGCCGGGCTTTAAAAAACCC--CTTATTG  
^1080 ^1090 ^1100 ^1110 ^1120 ^1130 ^1140 ^1150

v1080 v1090 v1100 v1110 v1120 v1130 v1140 v1150  
TTCGTAGATGACGGGACACACACTGA-AGACAAAC-TGAGCTCT-TATCAAGCTCTAACA-AATGAGTTTATTTTTCTTTTGTGGAC  
GC A T ACAC ACTGA AGA AA TG CCT T C AG TCT AAT TT A T  
GGGCACTT-----ACACGCACTGATGAAAATTTGGGCTATATTCGCACTTCTCTCAATAATCTTAAAAATGGGAAAACCA--  
^1160 ^1170 ^1180 ^1190 ^1200 ^1210 ^1220 ^1230 ^1240

v1160 v1170 v1180 v1190 v1200 v1210 v1220 v1230 v1240  
TAAAT--ACTGCTGCAAGCAAGGTAGAGGTGTGAAAGTTAT-ACAATTAATGCCGATATATACGGCAATATGCAATTCGCTGGAGT  
AAA A AC AA AC A A A AA G AT A A AA CG TATATAC AAA AT AATT A T  
AAAAACAAAACAAAACAAAACAAAACAAAACAAAATGGAATGAAATGAAACAAAACGGCTATATACATAAAAAT--AATTAAGTAAT  
^1250 ^1260 ^1270 ^1280 ^1290 ^1300 ^1310 ^1320 ^1330

v1250 v1260 v1270 v1280 v1290 v1300 v1310 v1320  
GAA-AAAACATCGATACCACTTCAACATTCGAATCGATATTGT--ATCGCACATCC-TACTGTACACGATTTAT-TCAT-AATA  
AA AAAAC T GA A ACAT AA GAA ATA T AT A ATC TA GTTA A GTAT AT T AT AA A  
CAAGAAAACGT-GAAA--ACATGAAAGCGGAGAAAATAAATCGGAATTAATATATCTGTATGTTA-AAGTATGAATATGATCAACA  
^1340 ^1350 ^1360 ^1370 ^1380 ^1390 ^1400 ^1410

v1330 v1340 v1350 v1360 v1370 v1380 v1390 v1400 v1410  
TTCGATGTAATTTATTTTATGATTAATGATTAATCTTTGTAAGGAAACAACA--AATTTATTTTATTTATCGCTTCAATTA-TATT  
T AA FAA A AT G TAA FA T TA C T T G AACA CA AAT FAT TATT TA C T ATT A  
TA--AAGTTAAGCAAT--GCTAATGTAATTTTTCGCTT-TTGAACATCACTAATATATCTGATTTGACCG--TAAATTAAG--  
^1420 ^1430 ^1440 ^1450 ^1460 ^1470 ^1480 ^1490

v1420 v1430 v1440 v1450 v1460 v1470 v1480 v1490 v1500  
TTCCGATATAACAGTTTTTATGATCAATAATACATAGTAAAGTTTAAACAGGTGTATTCGAGTATCCAATTTGATATATCTCTAATTTGGAA  
CC TTTAGA AT A C TACG AATT  
---CCA-----TTTGA--ATGAAACGTACG-----AATT-----  
^1500 ^1510

v1510 v1520 v1530 v1540 v1550 v1560 v1570 v1580 v1590  
ATCTATTTTTATAGCAATTTAATTTGGAATGTGAAGTTATTTATCCGGTACTCGTAGATTAACAGAACACACCCGAAAAAATTT  
-----  
-----  
-----  
^1520

v1600 v1610  
-----CACT--TTGCA-----CTCA  
CAGCT TT CA CTCA  
CAGAAATCGCAGTGCATTTCCAAACATTTTGGACCCTGCACTCGTCTTCTCATCTCTCGCTACTTGTCAAAATGCTCTGAAAACCGG  
^1620 ^1630 ^1640 ^1650 ^1660 ^1670 ^1680 ^1690 ^1700

v1620 v1630 v1640 v1650 v1660 v1670 v1680 v1690 v1700  
-----  
-----  
-----  
-----  
-----

v1620 v1630 v1640  
-----CACTATTCGCTAACGGGTATCTGATGCTGGAG



```

^3120 ^3130 ^3140 ^3150 ^3160 ^3170 ^3180 ^3190 ^3200
-----
AGTACACAAGGTAGTATCCAAATTTTATTTGTTCAATTTGTTCAATGTGCGTTCTGCCTGTAGCGCCAGTGCCTTCTCCGTTGTCGGCTT
^3210 ^3220 ^3230 ^3240 ^3250 ^3260 ^3270 ^3280 ^3290
-----
-----
CCAGGAGTTCGATGCTGTGTA AAAAGTTTTTCAGGATGTGTGCATGTTTTTCGTCCTCTCGCAGCCTTGTGTCCAGGTAAGCGTTGCAGG
^3300 ^3310 ^3320 ^3330 ^3340 ^3350 ^3360 ^3370 ^3380
-----
-----
GCAGTCCATTGTCGACAGCTTGATTTCTTGGAGCCATGTTCTTAAATGGAATTAAATCGCGTCCGAATGTTTATATCTGGGTTAGGCT
^3390 ^3400 ^3410 ^3420 ^3430 ^3440 ^3450 ^3460 ^3470
-----
-----
v3380 v3390 v3400 v3410 v3420 v3430 v3440 v3450
-----
-----
TACAGTGTGACCGTTGATTGACAT-----GAAAAG-----AAATAGA-TTCTATGAGAAGTATTCAAA-----AAGCGCC-----
^3480 ^3490 ^3500 ^3510 ^3520 ^3530
-----
-----
CTATCTGTGAGTTTCTAAATTTCTGATCAAGTGGGCATGAAAATAACATTTTGTTGTTGTGACTTTCGTATCAGTAAACGACCAGT
GTTT C A T AACATT TG
-----
-----
v3460 v3470 v3480 v3490 v3500 v3510 v3520 v3530 v3540
-----
-----
TAACATTTGGCCACACCCTGAAAACAGCTCCGAAAAAATTCACAAAATAAGCCGTTGAAAAATTTTTCAAAAGTAAAAGGGCAGGAA
GCC GCAC TG CT A C A AT AC TG TACAAA
-----
-----
v3640 v3650 v3660 v3670 v3680 v3690 v3700 v3710 v3720
-----
-----
AATTAGCCTTTTCTACGTTTATACATATTTGGTAAAAATTCCAAACCCAGTATTTGTATCCAGGAACAGAAGGTAAGTTTCAAATTTA
-----
-----
-----
v3730 v3740 v3750 v3760 v3770 v3780 v3790
-----
-----
AACCATTTTGTGACACCAATCGCGTGTCTCACACACCCTCAATCACAAATCAAATTTTCGGTCCAAATAAAAAA-----
ATAAAAAA
-----
-----
v3800 v3810 v3820 v3830 v3840
-----
-----
AACAGTACAAATTTCAAAATATAATTTAGCAAAAAAATAATTTGTTTACTTTGAAATGCAATTTAACTTTTATTCGCCAATCACTCTGT
^3620 ^3630 ^3640 ^3650 ^3660 ^3670 ^3680 ^3690 ^3700
-----
-----
A-----AGCTTTCGATAGATA-----TCGGACAACATT-----TTTTTCGTTA-GCCCCAT-----CCATTC
A A T TG T A TA T ACAAC T TT T T C TT A G C C AT CCA
ACACAGTACTTATGATTTAATACTTTCACAACGTAATTTATATTGGGATTTGCACTTTATGGCCAAATTTGTTATAATGACCAAAA
^3710 ^3720 ^3730 ^3740 ^3750 ^3760 ^3770 ^3780 ^3790
-----
-----
v3900 v3910 v3920 v3930 v3940 v3950
-----
-----
ATTTT-----AGTTCATCGAAGCAGTTGT-----ATTTTCCAAATTCGTTGT-----TACTTTCGACATT-
A T AGT T AAG AGT T ATTT C ATTC TTGT T GTTT A AT
AAATAAGCAACAACAACCAAGTAAATTTGAAAGCAATTTGAAGATTTGCGTATTC-TTGTAGAAAAGTACATGTTTAAATAATG
^3800 ^3810 ^3820 ^3830 ^3840 ^3850 ^3860 ^3870 ^3880
-----
-----
v3960
-----
-----
-TC-ATACATTTGGT---TGAT
TC AT ATTTG T AT
ATCGGATGATTTGACCAATAAT
^3890 ^3900

```

6b)

CG32690 focal and paralogous regions  
Martinez/Needleman/Wunsch DNA Alignment  
Minimum Match: 9; Gap Penalty: 1.10; Gap Length Penalty: 0.33  
D. mel region including coding sequence (above, X:10048490-10052044)  
D. mel region including noncoding sequence (below, X:9401077- 9404826)

```

v610 v620 v630 v640 v650 v660 v670 v680 v690
-----
-----
v700 v710 v720 v730 v740 v750 v760
-----
-----
v770 v780 v790 v800 v810 v820 v830 v840 v850
-----
-----
v860 v870 v880 v890 v900 v910 v920 v930 v940
-----
-----
v950 v960 v970 v980 v990 v1000 v1010 v1020 v1030
-----
-----
v1040 v1050 v1060 v1070 v1080 v1090 v1100 v1110 v1120
-----
-----
v1130 v1140 v1150 v1160 v1170 v1180 v1190 v1200 v1210
-----
-----
v1220 v1230 v1240 v1250 v1260 v1270 v1280 v1290 v1300
-----
-----
v1310 v1320 v1330 v1340 v1350 v1360 v1370 v1380 v1390
-----
-----
v1400 v1410 v1420 v1430 v1440 v1450 v1460 v1470 v1480
-----
-----
v1490 v1500 v1510 v1520 v1530 v1540 v1550

```



AAATTCGAGCTCAACGAGGTATGACATTCATATTCAGACAATTAATTTTAAAGTTATGGCCAAAAAAGTATTGATGACCGAAAT  
^2720 ^2730 ^2740 ^2750 ^2760 ^2770 ^2780 ^2790 ^2800

v3530 v3540 v3550  
--GAAAGTGGCG-----AAATCCTAGATGGCGCCAGCG  
GAAA CGG AAA T GAT C A CG  
TCGAAAAACGGATTTGCCAAAAAGTTGATATTTCAAACG  
^2810 ^2820 ^2830 ^2840

6c)

CG15323 focal and paralogous regions

Martinez/Needleman-Wunsch DNA Alignment

Minimum Match: 9; Gap Penalty: 1.10; Gap Length Penalty: 0.33

D. mel region including coding sequence (above, X:19942791-19945740)

D. mel region including noncoding sequence (below, X:19928993-19931847)

v10 v20 v30 v40 v50 v60 v70  
CGTAAGATT--AGCAATGAAAAGAAGATTTTCAACAGAATCTTAAAGGGCCGACGCTCACTCGGCCCTCGTGAATTCG  
T A TT AGCAATGAAAAGA GATTTTCA AGAATCTTAA GGGCCGACGCTCA TCTCGCTCGTCAATTCG  
--TCATTTTCGAGCAATGAAAAGACGATTTTCAATAAGAATCTTAAAGGGCCGACGCTCACTCGGCCCTCGTGAATTCG  
^870 ^880 ^890 ^900 ^910 ^920 ^930  
v80 v90 v100 v110 v120 v130 v140 v150  
CTTTATGATTCCTGCTTTATGATTCCTCGGTGATAAATGGGTTTCGGTCACTGAATCCAATGAAGACATCTCCAGTTTAC  
CT G TTTATGAT CTT G CGAATATGGGTTTCGGTCACTGAATCCAATGAAGACATCTCCAGTT AC  
CT-----GTTTTATGATCCTTAAGACGATAAATGGGTTTCGGTCACTGAATCCAATGAAGACATCTCCAGTTGAC  
^940 ^950 ^960 ^970 ^980 ^990 ^1000  
v160 v170 v180 v190 v200 v210 v220 v230  
CATATACTCGACGAAGGCCATCTGGATGCAAGCGAGGCACGTGAG--CTAGGCTGCTAGACTGTCCCTGATCCCTGAGTGT  
CATATACTCGACGAAGGCCATCTGGATGCAAGCGAGGCACGTGAG CTAG TGCTAGACTGTCCCTGATCCCT AGTGT  
CATATACTCGACGAAGGCCATCTGGATGCAAGCGAGGCACGTGAGTCTAGGGTGTAGACTGTCCCTGATCCCTGATGTTG  
^1010 ^1020 ^1030 ^1040 ^1050 ^1060 ^1070 ^1080  
v240 v250 v260 v270 v280 v290 v300 v310  
CTTCTAAGTTTATGTTGATGAGTACCCAGTATGAGTCCGTGACATCTGGCGACTGCAAGATCCGAGAACAAATCC  
CTTCTA GTT ATGTTGATGAGTACCCAG AGCTATGAGTCCGTGACATCTG GCGACTGCAAGATCCGAGAACAAATCC  
CTTCTAATGTTATGTTGATGAGTACCCAGTATGAGTCCGTGACATCTGAGCGACTGCAAGATCCGAGAACAAATCC  
^1090 ^1100 ^1110 ^1120 ^1130 ^1140 ^1150 ^1160  
v320 v330 v340 v350 v360 v370 v380 v390  
AGCTTAAGTGGTCCGTTGCATTTAGCGGCAAAACCCGACAGAAGCTTGAAGTGGACGACGACAGCAGTCCGTGAGAGAGA  
AGCTTAAGTGGTCCGTTGCATTTAGCGGCAAA CCGACGAGAAGCTTGAAGTGGACGACGACGACGAGTCCGTGAGAGAGA  
AGCTTAAGTGGTCCGTTGCATTTAGCGGCAATCCCGACAGAAGCTTGAAGTGGACGACGACGAGTCCGTGAGAGAGA  
^1170 ^1180 ^1190 ^1200 ^1210 ^1220 ^1230 ^1240  
v400 v410 v420 v430 v440 v450 v460 v470  
CTGGCACTGGCGCCCATCAGTAAATCAATGCGTTGAGAACTACGAAACTCTGGGTCCGCGAGCATAAAGTTTTGGGTTAT  
CTGGCACTGGCGCCCATCAGTAAATC ATGCGTTGAGAACTACGAAACTCTGGGTCCGCGAGCATAAAGTTTTGGGTTAT  
CTGGCACTGGCGCCCATCAGTAAATCTATGCGTTGAGAACTACGAAACTCTGGGTCCGCGAGCATAAAGTTTTGGGTTAT  
^1250 ^1260 ^1270 ^1280 ^1290 ^1300 ^1310 ^1320  
v480 v490 v500 v510 v520 v530 v540 v550  
GTTCCAGGTGCAAGGGTGTCAATGCAAGAAGCAGCGTGGCTTTCATATATTTGGAGGCTATTGAGTATGTTAGCGTTC  
GTTCCAGGTGCAAGGGTGTCAATGCA AAG ACGGCTGGCTTTCATATATTTGGAGGCTATTG AGTAGTATG GTTC  
GTTCCAGGTGCAAGGGTGTCAATGCAATAAGAAGCAGCGTGGCTTTCATATATTTGGAGGCTATTGAGTATGTTAGCGTTC  
^1330 ^1340 ^1350 ^1360 ^1370 ^1380 ^1390 ^1400  
v560 v570 v580 v590 v600 v610 v620 v630  
CAGATCGCATGAAATGTATTTACTGACGAACCATCTGTCTCAAAGCTTCTGACATCTTGAAGTTGAAGCTGCAATGGA  
AGATCGCATGAAATGTATTTA  
GAGATCGCATGAAATGTATTTA-----  
^1410 ^1420 ^1430  
v640 v650 v660 v670 v680 v690 v700 v710  
GATCCACCATCAACAGAGCAGCGCATGAAATGAAGATCTTCTGAACGGTTTCTCAGTAATACGGTGGCAGTATTAAGCC  
AATG  
-----AATGT-----  
v720 v730 v740 v750 v760 v770 v780 v790  
GCACAACATATTTACCAAGATCTGGCCAGAAGAGCAGAAGACGTTCTTAGCGTCTATGGTATGATGAGTCAGAAATTA

v800 v810 v820 v830 v840 v850 v860 v870

ACGTTTCTCCAGGCTGTGATCTTTTCATGTGGTGAAGCGGAGGCCAATTTGGTGTCTAAATTCGAAAAGAGTTGCACACCT  
A  
-----AT-----  
v880 v890 v900 v910 v920 v930 v940 v950  
CGGTTGATAACCACTCCTGATACAATATACCAAAATACCAATGCAATTTATGGTCACACTATGTTACTGAATGGACTTAGTG  
-----  
v960 v970 v980 v990 v1000 v1010 v1020 v1030  
TTAACGCATAAATTAATATTATGGGCATTACTTAAATGGTTCGTTAATTAGCACACTTATATACTATAAAAACAACAAA  
-----  
v1040 v1050 v1060 v1070 v1080 v1090 v1100 v1110  
ATAATCATCTTTGTCTAATATAGAAATAAATAATCCGCTCTTTAAAGTGAGAGACAAGTTTCGAGATTGGATATATTTGCTCA  
-----  
v1120 v1130 v1140 v1150 v1160 v1170 v1180 v1190  
AATGATATATATATGGCAAAATTTTCAAACCTTTGTATATTCGAGCATTCCCTAATTTCAAAGGAACCTTAAAAATCCAC  
-----  
v1200 v1210 v1220 v1230 v1240 v1250 v1260 v1270  
ATTGAATTCGATCAAGTTGGCATGTCTGCTGACACCTGAACATGAAGTTTCGTCGCACTGAAAATAAAGTTCACTTTCC  
-----  
v1280 v1290 v1300 v1310 v1320 v1330 v1340 v1350  
TCTCACCAAATGCCTAGGAACAATATCCAGAGCTCAACTGAATTTAGAAATGGCGAGAGAAGTCCGACCGGATCCCAAG  
GAAGTCAACGCG ATGC A  
GAAGTCAACCGAATGCATAT  
^1440 ^1450 ^1460  
-----  
v1360 v1370 v1380 v1390 v1400 v1410 v1420  
GCATCTAAAAACAAGTACATGACGCGAGGATCCTGAGCAGCCAACTGAATC-----GTCCACCCAGA-A  
CA CTA AATCAAC AGTA TGACGAG AGGATCCTGAGCAGCC ACTG ATC GT C CC A A  
TCAACTAGAAACACAGGATTTGACGAGGAAGGATCCTGAGCAGCCGAGTGTATCGAATATGATAGTTCCGCTACTTTA  
^1470 ^1480 ^1490 ^1500 ^1510 ^1520 ^1530 ^1540  
-----  
v1430 v1440 v1450 v1460 v1470 v1480 v1490  
GGAAGAGGGTTCGCAGTCTTCAGAG-----TCCGAGGAA-----GAA-----TACTTTAAGAAATGTCTCCGAGCGCTTCGA  
G AGGGT GCAGTC T A AG T C GA GAA T CTTT GAA G C AGCGC TCGA  
CACGAGGGTAAAGCAGTCCCTTACAGGCTTCTTCTGACAATTAAGCTTTTTCTTTTGAA-GAGATCCAGCGCATCGA  
^1550 ^1560 ^1570 ^1580 ^1590 ^1600 ^1610  
-----  
v1500 v1510 v1520 v1530 v1540 v1550 v1560 v1570  
TAAGGCATAAAGGACCTGAAAGATCTGATTGCCCTGAATGAGAAGAAATGTAATAGGCTGTTATTTCGATGCCCTCTGG  
T AGGA ATA AGGAC TG A CTGATTG CC AA GAGAAGGAATGT A A CTGT T TC CTC TG  
TGAGGAATACAGGACATGGAGAGGCTGATTTCCAAAGGAGGAAGGAATGTGAATACTGTACTTATTTTCAGTCAATCG  
^1620 ^1630 ^1640 ^1650 ^1660 ^1670 ^1680 ^1690  
-----  
v1580 v1590 v1600 v1610 v1620 v1630 v1640 v1650  
ATGTAATCAGAGTGGAAATAGAGAAAAGTCACTATTGCCGAAGAAATAGTATATTAACCTATTTCCCAAAATACCAATGT  
ATGTAATC GAG G A TA AAAA C A ATTTGC G A A TAGTATAT C AT TAC TG  
ATGTAATCCGAGACTAAGCCAAAATCAATATTGCGAGGACACTAGTATATG-----CGAT-----TAC--TG-  
^1700 ^1710 ^1720 ^1730 ^1740 ^1750 ^1760 ^1770  
-----  
v1660 v1670 v1680 v1690 v1700 v1710 v1720  
ATTATCATGTATGGCTTCAGGCATAAAATAAATAAACAATAAATAGCTCTT-----CTATTATCCA--TTTCGAGC  
TTA A TAT G C AAATAATAA AA AA AA TT CT T T C TTTCGAGC  
-TTA--ACTTATTCGC-----AAATAAATAAATAAATAAATAAATTAATTAATGCTTATTGCTTTTTTCGAGC  
^1770 ^1780 ^1790 ^1800 ^1810 ^1820  
-----  
v1730 v1740 v1750 v1760 v1770 v1780  
AATGAA-----TCAAATCAAACGATTAATGTTTATTTATTTAGCGAACGAGTTATGTTACGA

AATGAA T A TCAAACGATTAATGTTTATTTA TTTAGCGAACGA  
AATGAAAAGGCGATTGATTTTTATGTAGTGATTCAAACGATTAATGTTTATTTACTTTAGCGAACGA-----  
^1830 ^1840 ^1850 ^1860 ^1870 ^1880 ^1890  
-----  
v1790 v1800 v1810 v1820 v1830 v1840 v1850 v1860  
TAGCGAGTGTAAAGGACCCATAAATGCAGAGCAGAACGCTAAGCCAAAAGTGCAGCACTAGAGAACTATTAGGATAG  
T ATT TATT  
-----TTATT-----TATT-----  
^1900  
-----  
v1870 v1880 v1890 v1900 v1910 v1920 v1930 v1940  
TATGTTGAAAAAAGGGGGGGGGGTAGCTTAGTTAATGAATACAACTGCTCACAGCTGATTGGCCGACAGTTGA  
CTT T ATG T C ATGC TGA  
-----CTTCATCGATGCGT-CTATGC-----  
^1910 ^1920  
-----  
v1950 v1960 v1970 v1980 v1990 v2000 v2010 v2020  
ACTGCGTCTTCAAAGTTGACATGTTGCAAAATGTATGTGTCCTCAGTGAATTCCTCTACAGATAAGCATGACCATAT  
ACTGCGCTTCAAAGTTG CATGTTG  
ACTGCGTCTTCAAAGTTGCTATGTTG-----  
^1930 ^1940 ^1950  
-----  
v2030 v2040 v2050 v2060 v2070 v2080 v2090 v2100  
GATCGCATTAATGGAATGTTATGTGTGATCTTTAATGAAAAATGACTGTACTGGAATTTAGCTCCGATCACTTTATATG  
AAAA AC AATTTAG A AT  
AAAAAACA-----AATTTAGG-----AAATT  
^1960 ^1970  
-----  
v2110 v2120 v2130 v2140 v2150 v2160 v2170 v2180  
CTTTATAACAGTTATGATCGCTTGTCTTTACGGCTTTGCGAATTCGGTTCGCGATTTAATAAATTTGCGCAAAGAA  
CT AC GC G T AC C G GAAT CC TTGCGCA TT  
CTGGCAGCTGC-----GGTAGAC--CAAAGAGAAATGCCATTGCCGAGTTC-----  
^1980 ^1990 ^2000 ^2010 ^2020  
-----  
v2190 v2200 v2210 v2220 v2230 v2240 v2250 v2260  
GCTCTCAAACAATGCAAGTA--CGATAAAGAGCTTCGATTCGCTTTTATTTATGCGCCCTGACAGCATCGAGCCGAGTCA  
TGC A TA CG GA  
-TGCATATCG-----GAT-----  
^2030  
-----  
v2270 v2280 v2290 v2300 v2310 v2320 v2330 v2340  
ATATCATTTGCTAGCGGGATCGGTTGAAAAGCCAAAGGCAAAATCAAAGTGCAAAAGTGTGCAAAATTCGAAGTCCGCCGCA  
-----  
v2350 v2360 v2370 v2380 v2390 v2400 v2410 v2420  
AGGAGACGGCTAGAGTGGCAGAGAGAGAGAGAAATGGGGGCGATACGAATGGCTGGCGTGCAGTGGGGGAGCTTCG  
-----  
v2430 v2440 v2450 v2460 v2470 v2480 v2490 v2500  
GTTGGAAGTGAATCTCAAAGCCCGCTTGTAATCCGACGGGTGACATCATTTTATATGCTGGCCGACCGCTTCAAAG  
-----  
v2510 v2520 v2530 v2540 v2550 v2560 v2570 v2580  
CGTCCCGCTTCAAAGCTCCCTGCTCCCCCTTCAACCCTGTTTCGCGAGGATCAACGAACAAATGGTGGTGGGGTGGGG  
-----  
v2590 v2600 v2610 v2620 v2630 v2640 v2650 v2660  
AGGAGGAGGGGGGGTGGGGTTCAGGAACGTGGCGGAGCCGGGAGACGCACACATAAAGTATTGTTGAATTTGAGA  
-----  
v2670 v2680 v2690 v2700 v2710 v2720 v2730 v2740  
GCTCCGCGAGATTTTGTGCTATGCTCTGTAGTTGACATAATATATATGTAATAATCGTTGCACATCCCATATCTCAC

v2750 v2760 v2770 v2780 v2790 v2800 v2810 v2820  
AGCGGGCAAGTGCCCCACTCCGGCTCCTTCTCCCAACAAGCTGGTAATATATGATGCGGGGTGTCGCACTTTGTGT

v2830 v2840 v2850 v2860 v2870 v2880 v2890  
GTGTGTGTGTGTGGGTGTGCATGAAATGGTCACTCTGTCTCGCCTCCAGGACCTTTACT-----GCCA--  
ACCCTTACT G CA  
ACCCTTACTCAGATAAAGTCAGT  
^2040 ^2050

v2900  
-----CGGCTTTCC-----TTGCCA-----  
C CT TTCC TTGCC  
GCGAAGCAATAGGAAAGCGACTGTTCCCAAGTGTGTGTTGAACATATGAATTATATATACTATATGCGCTACGATTT  
^2060 ^2070 ^2080 ^2090 ^2100 ^2110 ^2120 ^2130

v2910 v2920  
-----GGACTTT-----TTTAATACCG-----  
GGAC TT TTT AT C G  
CAGTCTTATCAAGGCGTTTTACGAATTCATTCAGCAGAGTAAGCATGGTGTACGCTCCCTTAATCATCTCGCAAAA  
^2140 ^2150 ^2160 ^2170 ^2180 ^2190 ^2200 ^2210

v2930 v2940  
-----AGAT-----TTA-----TGAAGCGT-----TGCTCGTGT-----T  
AG T TTA TGAAG GT TGCT TG T  
ATCGCTGATAAGGTGGTAAATGTAGCTTTGTACAGCACTACCACCGTGAAG-GTCTTCATGCTGATGGGCAAA  
^2220 ^2230 ^2240 ^2250 ^2260 ^2270 ^2280 ^2290

6d)

CG31909 focal and paralogous regions  
Martinez/Needleman-Wunsch DNA Alignment

Minimum Match: 9; Gap Penalty: 1.10; Gap Length Penalty: 0.33

D. mel region including coding sequence (above, **2L: 7256479-7259204**),  
D. mel region including noncoding sequence (below, **2L: 7230999-7233820**)

v20 v30 v40 v50 v60 v70 v80 v90  
GATGAC--ACCTGTGCGCATTGATCGCTG--GTTTGGCGC-----CTTGGCAATGGCCCTCGTTGACTTTTGCCTCAAGAGCGTGGCT  
TG C ACCT TC A G CGCTG GTT CG CTTC AT G CTC TTGA TTT CTC A C CT  
--TGCCGTACCTATCA-AGAGCAGCGTGTGTTTTCGATGATTATCTTTGCC-ATAGACTC-TTGATTTTT---CTCTACTCTCATTTCT  
^180 ^190 ^200 ^210 ^220 ^230 ^240 ^250  
v100 v110 v120 v130 v140 v150 v160 v170 v180  
GTGGCATTGAAGTCGGCCATCTCTCCAGCAAGTTTTCATCGAACAGGAGCCGGAGACGCCGTGGCAGTTCGACT--TGTCATCATCT  
CA T A G CA CTT CC CAA TTC T C A GA T A TTG T TGTC A C  
ACT--CACTATATATG--CAACTTAAACCTTCAAAAGTTCGTTAGTCTTACTATGATAAATATCCAAITGTTGTGCTGTCTA-CCCAA  
^260 ^270 ^280 ^290 ^300 ^310 ^320 ^330 ^340

v190 v200 v210 v220 v230 v240 v250 v260 v270  
GCGAGGACAGCTTCGAGCCGACCTGAAGAAGTTTAAATAGCACAGGATTTCTATAAATATCTCCCTTCTGCTCTTAAATATA  
C A CA TT C A T A A A AGT TAA A A G A C T A T T CT TC T TATA  
ACAATTTAGCAATTTATCTTTATATTTAAGCAACAGCTTAACCAAAATATGAAAACCCCTATTTTACTCTCAAATC--TTGCTATA  
^350 ^360 ^370 ^380 ^390 ^400 ^410 ^420

v280 v290 v300 v310 v320 v330 v340 v350 v360  
TCTCTTACCTCTGAGTCATGTCGCAATATCTCGCTGACCTCGTACCATCACCACCGCGAAGTCCAGGAAGCTGCGTCCACCGGCT  
TCTCT A TCT TCAT TGA T T CCAT TC GAA T CGT TT  
TCTCT--AATTT--TCAT-----TGATTTGTTTCCAT-----TCTTTGAAA-TACGT-----TT  
^430 ^440 ^450 ^460 ^470

v370 v380 v390 v400 v410 v420 v430 v440 v450  
GCCGTGCTCAGATTGTCATTCAGCCGCCCCACTGGAAGTCCGCGCCTCCCTGTGTGCTTTTGGCCCGCAGCTGCAGTCAAGTCA  
C T C TCA TT C TT CC C T AA T T CC T CTTTT T CACT GT A  
TCATTTT--TCATTTTAACTTT---CC-CATTTTATAAAGTAAATACCAA--TACTTTTA-----TACACTGATAAA  
^480 ^490 ^500 ^510 ^520 ^530 ^540

v460 v470 v480 v490 v500 v510 v520 v530 v540  
TACGTCTCGGCACAGCCCTGGCTATCGAGTGGGTCAAGGCGCCCTGTGAGCCGCTGGACGA-AGGCAGTCTCTCTTGTAGAGCTTC  
A GT C T AC G TG TAT A AT GCG C T T A C G AC A AGG A T  
AATGTACTT---ACTTGA- TGTTATAAAT---ATTGCGATCAATTTTA-CTATGACACAGAGGAATG-----  
^550 ^560 ^570 ^580 ^590 ^600

v550 v560 v570 v580 v590 v600 v610 v620 v630  
TGAAGATGTTCCGCTTTCCGCCGCTCTCGATCGAGCAGTCCAGCGGCTGAGCGGAAGTGTCTTCCGCGAGTGGTGGTCCAGACGG

v640 v650 v660 v670 v680 v690 v700 v710 v720  
CGGGCCTCGCTAAGGTTCCCGCAATCCGCTCTCCTTTCGACACTGGTGGTTCCTGACCGCGGCGAGGCAATGATCTCGAGGGTCCA

v730 v740 v750 v760 v770 v780 v790 v800 v810  
CCAATTTGGCCCTGCGAAGTGAACACCGCCATCACCGTGTGCTCCGAATGAAGTGTGCTGCGAGCAGATAAAGATTTTCAAAATTTTTC

v820 v830 v840 v850 v860 v870 v880 v890 v900  
ATAAGAAAAGGTAAGGATTTCTTAAAGTCTTTTATAGACTATACCAAAATTAATACGTTTTTATATAAAAAGAGAGAAATCTA  
CTA  
-----CTA-----  
^610

v910 v920 v930 v940 v950  
TAGTCGAATCCCGACTATTAGAAAGCCCTTACTCAGCT-----AGTGGGAACGCAAAA-----

TAGTCGAA TCCCAGCTA AGA A CC TTAC CAGCT AGTG GAACGC AAA  
TAGTCGAATCCCAGCTAACAGATACCCGTTACCGAGCTGGTGAAGTGAGAACCAGAAATTCATTTTTTGGCATTACCCAGATAGATATT  
^620 ^630 ^640 ^650 ^660 ^670 ^680 ^690 ^700

GGAGAATATAATGAGAAAAAGCGGTTTTGTGGCGTTAGAGTGGCGGAGGGACATGGGTCTACAAACTTGGAGCTGGCTTAAGTCTCT  
^710 ^720 ^730 ^740 ^750 ^760 ^770 ^780 ^790

GGAACTATATGCTTAATCTTAACCTTCTAGCTTTTTATAGTCTTGGACGTTTCATACCGGCTGACAGACAGGGCAGGGCCAGCATGCAC  
^800 ^810 ^820 ^830 ^840 ^850 ^860 ^870 ^880

-----TCTTTCTAATCTAGTATGCACCTTTTACTCTACGAGTA  
TCTTTCTAATCTAGTATGC CTTTACTCTACG TA  
TCGGCTATTGATCCTGATCAAATATATATATACTTTATATGCTCGGAAACGCTTCTTCTAATCTAGTATGC-CTTTACTCTACGAAATA  
^890 ^900 ^910 ^920 ^930 ^940 ^950 ^960

v1000 v1010 v1020 v1030 v1040 v1050 v1060 v1070 v1080  
AGGGAAAATTTCCGACCGGAGGAGCGAGTTGTGTTAAGTGTCAAGTCCAAATAGACCCCTACAGTCAGAAAACCTTATATAGTGGCGTGAGTGA  
AG GAAAATTT GAACGGAGAGCGAGTTGTGTTAAGTGTCAAGTCCAAATAGACCCCTACAGTCAGAAAACCTTATATAGTGGCG  
AGGAAAATTTGAACGGAGAGCGAGTTGTGTTAAGTGTCAAGTCCAAATAGACCCCTACAGTCAGAAAACCTTATATAGTGGCGG  
^970 ^980 ^990 ^1000 ^1010 ^1020 ^1030 ^1040 ^1050

v1090 v1100 v1110 v1120 v1130 v1140 v1150 v1160 v1170  
GGTGAAGTGAAGAAAGTGGTTCGATCTTAACATAAAAAAATTTTTCTGATTTTAAACAAAATAAGATTTCTTGGTACGTATGAACACAG  
AAGTGA GTTCGATCTTAACATAAAAAA ATTTTTCTGATTTTAAACAAAATAAGATTTCTTGGTACGTATGAACACAG  
-----AAGTGAAGTTCGATCTTAACATAAAAAAAGATTTTTCTGATTTTAAACAAAATAAGATTTCTTGGTACGTATGAACACAG  
^1060 ^1070 ^1080 ^1090 ^1100 ^1110 ^1120 ^1130

v1180 v1190 v1200 v1210 v1220 v1230 v1240 v1250 v1260  
AATGAACGACCAATGTTTATATCTAAGCTCATATAATGCGAGACACAAAGGTGCTGTCCACCTACCCACAAAATAAATGGAAACCTCG  
AATGAACGACCAATGTTTATATCTAAGCTCATATAATGCGAGACACAAAGGTGCTGTCCACCTACCCACAAAATAAATGGAAACCTCG  
AATGAACGACCAATGTTTATATCTAAGCTCATATAATGCGAGACACAAAGGTGCTGTCCACCTACCCACAAAATAAATGGAAACCTCG  
^1140 ^1150 ^1160 ^1170 ^1180 ^1190 ^1200 ^1210 ^1220

v1270 v1280 v1290 v1300 v1310 v1320 v1330 v1340 v1350  
TTTTCCAATCTAACAAATCGGAACCTCAGAACCAACTACGAGTAGAGAGCTCTGCAAGATAAATATTTAAAGAAATTTCTTCAATG  
TTTTCCAATCTAACAAATCGGAACCTCAGAACCAACTACGAGTAGAGAGCTCTGCAAGATAAATATTTAAAGAAATTTCTTCAATG  
TTTTCCAATCTAACAAATCGGAACCTCAGAACCAACTACGAGTAGAGAGCTCTGCAAGATAAATATTTAAAGAAATTTCTTCAATG  
^1230 ^1240 ^1250 ^1260 ^1270 ^1280 ^1290 ^1300 ^1310

v1360 v1370 v1380 v1390 v1400 v1410 v1420 v1430 v1440  
CGGGATGAGCTAAATCACTTAATGATGGCACTACTCCGAGCATATGAGACTTATGAATATTTGACACTGTGCACACTGAAAGCGGT  
GCGGATGAGCTAAATCACTTAATGATGGCACTACTCCGAGCATATGAGACTTATGAATATTTGACACTGTGCACACTGAAAGCGGT  
GCGGATGAGCTAAATCACTTAATGATGGCACTACTCCGAGCATATGAGACTTATGAATATTTGACACTGTGCACACTGAAAGCGGT  
^1320 ^1330 ^1340 ^1350 ^1360 ^1370 ^1380 ^1390 ^1400

v1450 v1460 v1470 v1480 v1490 v1500 v1510 v1520 v1530  
CCTTCTCCGAGAAAGAAAAGTTAACTAACTTTTCTATAAATGAAGGCGATCTACAGAAATATATAGGAAATCTCGAGAAAC  
CCTTCTCCGAGAAAGAAAAGTTAACTAACTTTTCTATAAATGAAGGCGATCTACAGAAATATATAGGAAATCTCGAGAAAC  
CCTTCTCCGAGAAAGAAAAGTTAACTAACTTTTCTATAAATGAAGGCGATCTACAGAAATATATAGGAAATCTCGAGAAAC  
^1410 ^1420 ^1430 ^1440 ^1450 ^1460 ^1470 ^1480 ^1490

v1540 v1550 v1560 v1570 v1580 v1590 v1600 v1610 v1620  
CCAAAATATTTAAACGAAATCAGGAGTTC AACTATATAAAGGACAAATATAGATTTACTGGATGAAGTAGACGCTTTGAAGGTTGCGATG  
CCAAAATATTTAAACGAAATCAGGAGTTC AACTATATAAAGGACAAATATAGATTTACTGGATGAAGTAGACGCTTTGAAGGTTGCGATG  
CCAAAATATTTAAACGAAATCAGGAGTTC AACTATATAAAGGACAAATATAGATTTACTGGATGAAGTAGACGCTTTGAAGGTTGCGATG  
^1500 ^1510 ^1520 ^1530 ^1540 ^1550 ^1560 ^1570 ^1580

v1630 v1640 v1650 v1660 v1670 v1680 v1690 v1700 v1710  
AATATGCTTTGACGGACAGGTGGGATTTGAAAAATGAAAAAATTCGGGTGTTACTTT-ATTTTTTATGGTAAAAAATAAATAAGAA  
AATATGCTTTGACGGACAGGTGGGATTTGAAAAATGAAAAAAT TGTACTT AT ATGGTTAAA TAAA AA  
AATATGCTTTGACGGACAGGTGGGATTTGAAAAATGAAAAAATAT -TGTACTTCAATAAAAAATGGTTAAA-----TAAA--AA  
^1590 ^1600 ^1610 ^1620 ^1630 ^1640 ^1650 ^1660

v1720 v1730 v1740 v1750 v1760 v1770 v1780 v1790 v1800  
ACAGGTACCCGTTATCTTTTACTCTACAGATATAACAGGTATATATGG---ATPCGGATTTCTATTAAGCGCACCTATCTTGGCTTG  
ACAGGTACCCGTTA TC T T AA TAA T A GG ATT G C TT A ACA CTAT TTT CTT

ACAGGTACCCGTTACTCAGCTTTGGGGAAAGCTAAATTTTCAAAGGAAATTTTGGCAACATTTGAAAAACAACATATATTA-CTTC  
^1670 ^1680 ^1690 ^1700 ^1710 ^1720 ^1730 ^1740 ^1750

v1810 v1820 v1830 v1840 v1850 v1860 v1870 v1880 v1890  
CAGATGATTTTACACAGATTCAGCGCCAGTGGCCATCTAG-CAGAACTTGTATGAAGCTTTGTGGCGAGCAATCGTAAAAATAC  
CAG TGA TTTA A AGA T G C AGT CG A TA CAGA G AT A CT CGA CA TAA ATA  
CAG-TGAAGTTA-ATAGAACTT---GACAAAGTTCG---AGTACTCAGA---GAAT-ACCTT-----CGA-CA-----TAATGATAA  
^1760 ^1770 ^1780 ^1790 ^1800 ^1810

v1900 v1910 v1920 v1930 v1940 v1950 v1960 v1970 v1980  
CGTTTCAAAGAGATTTAAATTTGTGGCCCTACTTAGTTAAACCAATATGTCATTTGAACACTTAATAATTAATAATAATAATA  
C TT AAA A AA ATT TAC AGTT AA A A TC T GA CA TT T A A  
C---TTGAAAACAACCCGGATTT---TAC---AGTTGAAG-AGCAC-TC-TGGCAGCATTT-----TGGGCCCAACAACGCC  
^1820 ^1830 ^1840 ^1850 ^1860 ^1870 ^1880

v1990 v2000 v2010 v2020 v2030 v2040 v2050 v2060 v2070  
AATTAATTTATAAATTAATTAATAGCAACCCACCTTAGGATTCGACAACTCGAAATTCGAACTACAAAGTTTTTATCTGCTAATA

v2080 v2090 v2100 v2110 v2120 v2130 v2140 v2150 v2160  
ATAAACCGGCACATGAGAACTTTTATTTGATTTATCAAAAGTTACAACACACATGCTAGTATGCCCTTCTTATCAGTTTTCTAGAAA

v2170 v2180 v2190 v2200 v2210 v2220 v2230 v2240  
TAGCAGAGAAATTTCCCTTGAATG---GTTCCATGCCATATCTGTTCCA-GTTATTTGAGACTTATTTGGAATGCAAGTATC  
AATTTCCCT AA G G CC G C C G T C A G A TTC AA CT A GT TGC G C  
-----AATTTCCCT--AACGGCCAGCAGCCGGACCGCCGGATCCAATGAAAATCAAACCTGA---GTACCGCTGCCGGCCG  
^1890 ^1900 ^1910 ^1920 ^1930 ^1940 ^1950

v2250 v2260 v2270 v2280 v2290 v2300 v2310 v2320  
TTTGAATATATCAAAAGGAAAGCCG---CGCTGCACTTACCCGCTTCTGGCCAGCTCGGTT-ATCATTTTGGGC---ACCCA  
T G T TC AA GG C G C C G C A G A CCGT T A C TC T A A T T C C A G A  
ATGGGGCTTTTCTAAGCGTCCAGTGGAAAACCCAGCAACAGAA--CGCTCGTAAAGCACTACTCAAGAATCCATCAAGCA  
^1960 ^1970 ^1980 ^1990 ^2000 ^2010 ^2020 ^2030 ^2040

v2330 v2340 v2350 v2360 v2370 v2380 v2390 v2400 v2410  
CTCCGCGCGGACTGTGGGAGTATG---CTGATTTGAGAAATCTTAAATTTCTATAAATCTAAGCTGATGTAATGGCGCTAGC  
CG G A TG T G T TG CT TTTG G TT A T TC T T TAA TG AATT G A GA  
GCCCAAAGAAAGATGATTTTTTTTCTAGTTTCCGCT---TTGATTTTCTGTCTGTAAATGTTAAATAAATCTGGAAGAA  
^2050 ^2060 ^2070 ^2080 ^2090 ^2100 ^2110 ^2120 ^2130

v2420  
TAACGAGCTCAGCA  
T A TC G A  
T---ACATC-GAA
