# Supplementary material
Source: PubMed Central journal article supplement (PMC1502557)

NC15323

NC32582

NC32690

100 kb  
ladder

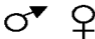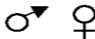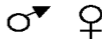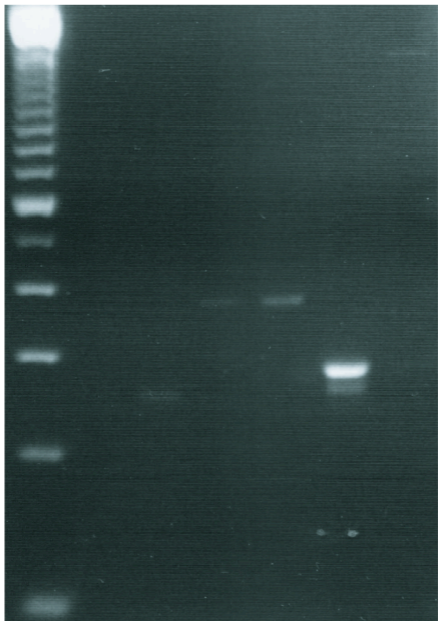

Supplement: pnas_0509809103_3.pdf [file pnas_0509809103_3.pdf]
